# Supplementary material for: Linear epitope mapping in the E and NS1 proteins of dengue and Zika viruses: Prospection of peptides for vaccines and diagnostics
Source: PLoS One. 2023 Oct 3;18(10):e0292451. doi: 10.1371/journal.pone.0292451 (PMC10547212; doi:10.1371/journal.pone.0292451)
Supplement: S2 Table — (XLSX) [file pone.0292451.s003.xlsx]

## Sheet: Peptides - Tabela 1
Column	Row	Peptide code	Name	ID
1	1	1	DENV-1-E	GSGSGSGMRCVGIGN
2	1	2	DENV-1-E	GSGSGMRCVGIGNRD
3	1	3	DENV-1-E	GSGMRCVGIGNRDFV
4	1	4	DENV-1-E	GMRCVGIGNRDFVEG
5	1	5	DENV-1-E	RCVGIGNRDFVEGLS
6	1	6	DENV-1-E	VGIGNRDFVEGLSGA
7	1	7	DENV-1-E	IGNRDFVEGLSGATW
8	1	8	DENV-1-E	NRDFVEGLSGATWVD
9	1	9	DENV-1-E	DFVEGLSGATWVDVV
10	1	10	DENV-1-E	VEGLSGATWVDVVLE
11	1	11	DENV-1-E	GLSGATWVDVVLEHG
12	1	12	DENV-1-E	SGATWVDVVLEHGSC
13	1	13	DENV-1-E	ATWVDVVLEHGSCVT
14	1	14	DENV-1-E	WVDVVLEHGSCVTTM
15	1	15	DENV-1-E	DVVLEHGSCVTTMAK
16	1	16	DENV-1-E	VLEHGSCVTTMAKNK
17	1	17	DENV-1-E	EHGSCVTTMAKNKPT
18	1	18	DENV-1-E	GSCVTTMAKNKPTLD
19	1	19	DENV-1-E	CVTTMAKNKPTLDIE
20	1	20	DENV-1-E	TTMAKNKPTLDIELL
21	1	21	DENV-1-E	MAKNKPTLDIELLKT
22	1	22	DENV-1-E	KNKPTLDIELLKTEV
23	1	23	DENV-1-E	KPTLDIELLKTEVTN
24	1	24	DENV-1-E	TLDIELLKTEVTNPA
25	1	25	DENV-1-E	DIELLKTEVTNPAVL
26	1	26	DENV-1-E	ELLKTEVTNPAVLRK
27	1	27	DENV-1-E	LKTEVTNPAVLRKLC
28	1	28	DENV-1-E	TEVTNPAVLRKLCIE
29	1	29	DENV-1-E	VTNPAVLRKLCIEAK
30	1	30	DENV-1-E	NPAVLRKLCIEAKIS
31	1	31	DENV-1-E	AVLRKLCIEAKISNT
32	1	32	DENV-1-E	LRKLCIEAKISNTTT
33	1	33	DENV-1-E	KLCIEAKISNTTTDS
34	1	34	DENV-1-E	CIEAKISNTTTDSRC
35	1	35	DENV-1-E	EAKISNTTTDSRCPT
36	1	36	DENV-1-E	KISNTTTDSRCPTQG
37	1	37	DENV-1-E	SNTTTDSRCPTQGEA
38	1	38	DENV-1-E	TTTDSRCPTQGEATL
39	1	39	DENV-1-E	TDSRCPTQGEATLVE
40	1	40	DENV-1-E	SRCPTQGEATLVEEQ
41	1	41	DENV-1-E	CPTQGEATLVEEQDA
42	1	42	DENV-1-E	TQGEATLVEEQDANF
43	1	43	DENV-1-E	GEATLVEEQDANFVC
44	1	44	DENV-1-E	ATLVEEQDANFVCRR
45	1	45	DENV-1-E	LVEEQDANFVCRRTF
46	1	46	DENV-1-E	EEQDANFVCRRTFVD
47	1	47	DENV-1-E	QDANFVCRRTFVDRG
48	1	48	DENV-1-E	ANFVCRRTFVDRGWG
49	1	49	DENV-1-E	FVCRRTFVDRGWGNG
50	1	50	DENV-1-E	CRRTFVDRGWGNGCG
51	1	51	DENV-1-E	RTFVDRGWGNGCGLF
52	1	52	DENV-1-E	FVDRGWGNGCGLFGK
53	1	53	DENV-1-E	DRGWGNGCGLFGKGS
54	1	54	DENV-1-E	GWGNGCGLFGKGSLL
55	1	55	DENV-1-E	GNGCGLFGKGSLLTC
56	1	56	DENV-1-E	GCGLFGKGSLLTCAK
57	1	57	DENV-1-E	GLFGKGSLLTCAKFK
58	1	58	DENV-1-E	FGKGSLLTCAKFKCV
59	1	59	DENV-1-E	KGSLLTCAKFKCVTK
60	1	60	DENV-1-E	SLLTCAKFKCVTKLE
61	1	61	DENV-1-E	LTCAKFKCVTKLEGK
62	1	62	DENV-1-E	CAKFKCVTKLEGKIV
63	1	63	DENV-1-E	KFKCVTKLEGKIVQY
64	1	64	DENV-1-E	KCVTKLEGKIVQYEN
65	1	65	DENV-1-E	VTKLEGKIVQYENLK
66	1	66	DENV-1-E	KLEGKIVQYENLKYS
1	3	67	DENV-1-E	EGKIVQYENLKYSVI
2	3	68	DENV-1-E	KIVQYENLKYSVIVT
3	3	69	DENV-1-E	VQYENLKYSVIVTVH
4	3	70	DENV-1-E	YENLKYSVIVTVHTG
5	3	71	DENV-1-E	NLKYSVIVTVHTGDQ
6	3	72	DENV-1-E	KYSVIVTVHTGDQHQ
7	3	73	DENV-1-E	SVIVTVHTGDQHQVG
8	3	74	DENV-1-E	IVTVHTGDQHQVGNE
9	3	75	DENV-1-E	TVHTGDQHQVGNETT
10	3	76	DENV-1-E	HTGDQHQVGNETTEH
11	3	77	DENV-1-E	GDQHQVGNETTEHGT
12	3	78	DENV-1-E	QHQVGNETTEHGTIA
13	3	79	DENV-1-E	QVGNETTEHGTIATI
14	3	80	DENV-1-E	GNETTEHGTIATITP
15	3	81	DENV-1-E	ETTEHGTIATITPQA
16	3	82	DENV-1-E	TEHGTIATITPQAPT
17	3	83	DENV-1-E	HGTIATITPQAPTSE
18	3	84	DENV-1-E	TIATITPQAPTSEIQ
19	3	85	DENV-1-E	ATITPQAPTSEIQLT
20	3	86	DENV-1-E	ITPQAPTSEIQLTDY
21	3	87	DENV-1-E	PQAPTSEIQLTDYGA
22	3	88	DENV-1-E	APTSEIQLTDYGALT
23	3	89	DENV-1-E	TSEIQLTDYGALTLD
24	3	90	DENV-1-E	EIQLTDYGALTLDCS
25	3	91	DENV-1-E	QLTDYGALTLDCSPR
26	3	92	DENV-1-E	TDYGALTLDCSPRTG
27	3	93	DENV-1-E	YGALTLDCSPRTGLD
28	3	94	DENV-1-E	ALTLDCSPRTGLDFN
29	3	95	DENV-1-E	TLDCSPRTGLDFNEM
30	3	96	DENV-1-E	DCSPRTGLDFNEMVL
31	3	97	DENV-1-E	SPRTGLDFNEMVLLT
32	3	98	DENV-1-E	RTGLDFNEMVLLTMK
33	3	99	DENV-1-E	GLDFNEMVLLTMKEK
34	3	100	DENV-1-E	DFNEMVLLTMKEKSW
35	3	101	DENV-1-E	NEMVLLTMKEKSWLV
36	3	102	DENV-1-E	MVLLTMKEKSWLVHK
37	3	103	DENV-1-E	LLTMKEKSWLVHKQW
38	3	104	DENV-1-E	TMKEKSWLVHKQWFL
39	3	105	DENV-1-E	KEKSWLVHKQWFLDL
40	3	106	DENV-1-E	KSWLVHKQWFLDLPL
41	3	107	DENV-1-E	WLVHKQWFLDLPLPW
42	3	108	DENV-1-E	VHKQWFLDLPLPWTS
43	3	109	DENV-1-E	KQWFLDLPLPWTSGA
44	3	110	DENV-1-E	WFLDLPLPWTSGAST
45	3	111	DENV-1-E	LDLPLPWTSGASTSQ
46	3	112	DENV-1-E	LPLPWTSGASTSQET
47	3	113	DENV-1-E	LPWTSGASTSQETWN
48	3	114	DENV-1-E	WTSGASTSQETWNRQ
49	3	115	DENV-1-E	SGASTSQETWNRQDL
50	3	116	DENV-1-E	ASTSQETWNRQDLLV
51	3	117	DENV-1-E	TSQETWNRQDLLVTF
52	3	118	DENV-1-E	QETWNRQDLLVTFKT
53	3	119	DENV-1-E	TWNRQDLLVTFKTAH
54	3	120	DENV-1-E	NRQDLLVTFKTAHAK
55	3	121	DENV-1-E	QDLLVTFKTAHAKKQ
56	3	122	DENV-1-E	LLVTFKTAHAKKQEV
57	3	123	DENV-1-E	VTFKTAHAKKQEVVV
58	3	124	DENV-1-E	FKTAHAKKQEVVVLG
59	3	125	DENV-1-E	TAHAKKQEVVVLGSQ
60	3	126	DENV-1-E	HAKKQEVVVLGSQEG
61	3	127	DENV-1-E	KKQEVVVLGSQEGAM
62	3	128	DENV-1-E	QEVVVLGSQEGAMHT
63	3	129	DENV-1-E	VVVLGSQEGAMHTAL
64	3	130	DENV-1-E	VLGSQEGAMHTALTG
65	3	131	DENV-1-E	GSQEGAMHTALTGAT
66	3	132	DENV-1-E	QEGAMHTALTGATEI
1	5	133	DENV-1-E	GAMHTALTGATEIQT
2	5	134	DENV-1-E	MHTALTGATEIQTSG
3	5	135	DENV-1-E	TALTGATEIQTSGTT
4	5	136	DENV-1-E	LTGATEIQTSGTTTI
5	5	137	DENV-1-E	GATEIQTSGTTTIFA
6	5	138	DENV-1-E	TEIQTSGTTTIFAGH
7	5	139	DENV-1-E	IQTSGTTTIFAGHLK
8	5	140	DENV-1-E	TSGTTTIFAGHLKCR
9	5	141	DENV-1-E	GTTTIFAGHLKCRLK
10	5	142	DENV-1-E	TTIFAGHLKCRLKMD
11	5	143	DENV-1-E	IFAGHLKCRLKMDKL
12	5	144	DENV-1-E	AGHLKCRLKMDKLTL
13	5	145	DENV-1-E	HLKCRLKMDKLTLKG
14	5	146	DENV-1-E	KCRLKMDKLTLKGMS
15	5	147	DENV-1-E	RLKMDKLTLKGMSYV
16	5	148	DENV-1-E	KMDKLTLKGMSYVMC
17	5	149	DENV-1-E	DKLTLKGMSYVMCTG
18	5	150	DENV-1-E	LTLKGMSYVMCTGSF
19	5	151	DENV-1-E	LKGMSYVMCTGSFKL
20	5	152	DENV-1-E	GMSYVMCTGSFKLEK
21	5	153	DENV-1-E	SYVMCTGSFKLEKEV
22	5	154	DENV-1-E	VMCTGSFKLEKEVAE
23	5	155	DENV-1-E	CTGSFKLEKEVAETQ
24	5	156	DENV-1-E	GSFKLEKEVAETQHG
25	5	157	DENV-1-E	FKLEKEVAETQHGTV
26	5	158	DENV-1-E	LEKEVAETQHGTVLV
27	5	159	DENV-1-E	KEVAETQHGTVLVQV
28	5	160	DENV-1-E	VAETQHGTVLVQVKY
29	5	161	DENV-1-E	ETQHGTVLVQVKYEG
30	5	162	DENV-1-E	QHGTVLVQVKYEGTD
31	5	163	DENV-1-E	GTVLVQVKYEGTDAP
32	5	164	DENV-1-E	VLVQVKYEGTDAPCK
33	5	165	DENV-1-E	VQVKYEGTDAPCKIP
34	5	166	DENV-1-E	VKYEGTDAPCKIPFS
35	5	167	DENV-1-E	YEGTDAPCKIPFSTQ
36	5	168	DENV-1-E	GTDAPCKIPFSTQDE
37	5	169	DENV-1-E	DAPCKIPFSTQDEKG
38	5	170	DENV-1-E	PCKIPFSTQDEKGVT
39	5	171	DENV-1-E	KIPFSTQDEKGVTQN
40	5	172	DENV-1-E	PFSTQDEKGVTQNGR
41	5	173	DENV-1-E	STQDEKGVTQNGRLI
42	5	174	DENV-1-E	QDEKGVTQNGRLITA
43	5	175	DENV-1-E	EKGVTQNGRLITANP
44	5	176	DENV-1-E	GVTQNGRLITANPIV
45	5	177	DENV-1-E	TQNGRLITANPIVTD
46	5	178	DENV-1-E	NGRLITANPIVTDKE
47	5	179	DENV-1-E	RLITANPIVTDKEKP
48	5	180	DENV-1-E	ITANPIVTDKEKPVN
49	5	181	DENV-1-E	ANPIVTDKEKPVNIE
50	5	182	DENV-1-E	PIVTDKEKPVNIETE
51	5	183	DENV-1-E	VTDKEKPVNIETEPP
52	5	184	DENV-1-E	DKEKPVNIETEPPFG
53	5	185	DENV-1-E	EKPVNIETEPPFGES
54	5	186	DENV-1-E	PVNIETEPPFGESYI
55	5	187	DENV-1-E	NIETEPPFGESYIVV
56	5	188	DENV-1-E	ETEPPFGESYIVVGA
57	5	189	DENV-1-E	EPPFGESYIVVGAGE
58	5	190	DENV-1-E	PFGESYIVVGAGEKA
59	5	191	DENV-1-E	GESYIVVGAGEKALK
60	5	192	DENV-1-E	SYIVVGAGEKALKLS
61	5	193	DENV-1-E	IVVGAGEKALKLSWF
62	5	194	DENV-1-E	VGAGEKALKLSWFKG
63	5	195	DENV-1-E	AGEKALKLSWFKGSG
64	5	196	DENV-1-E	EKALKLSWFKGSGSG
65	5	197	DENV-1-E	ALKLSWFKGSGSGSG
66	5	198	DENV-1/2-E	KLSWFKGSGSGSGMR
1	7	199	DENV-1/2-E	SWFKGSGSGSGMRCI
2	7	200	DENV-1/2-E	FKGSGSGSGMRCIGI
3	7	201	DENV-2-E	GSGSGSGMRCIGISN
4	7	202	DENV-2-E	GSGSGMRCIGISNRD
5	7	203	DENV-2-E	GSGMRCIGISNRDFV
6	7	204	DENV-2-E	GMRCIGISNRDFVEG
7	7	205	DENV-2-E	RCIGISNRDFVEGVS
8	7	206	DENV-2-E	IGISNRDFVEGVSGG
9	7	207	DENV-2-E	ISNRDFVEGVSGGSW
10	7	208	DENV-2-E	NRDFVEGVSGGSWVD
11	7	209	DENV-2-E	DFVEGVSGGSWVDIV
12	7	210	DENV-2-E	VEGVSGGSWVDIVLE
13	7	211	DENV-2-E	GVSGGSWVDIVLEHG
14	7	212	DENV-2-E	SGGSWVDIVLEHGSC
15	7	213	DENV-2-E	GSWVDIVLEHGSCVT
16	7	214	DENV-2-E	WVDIVLEHGSCVTTM
17	7	215	DENV-2-E	DIVLEHGSCVTTMAK
18	7	216	DENV-2-E	VLEHGSCVTTMAKNK
19	7	217	DENV-2-E	EHGSCVTTMAKNKPT
20	7	218	DENV-2-E	GSCVTTMAKNKPTLD
21	7	219	DENV-2-E	CVTTMAKNKPTLDFE
22	7	220	DENV-2-E	TTMAKNKPTLDFELI
23	7	221	DENV-2-E	MAKNKPTLDFELIKT
24	7	222	DENV-2-E	KNKPTLDFELIKTEA
25	7	223	DENV-2-E	KPTLDFELIKTEAKQ
26	7	224	DENV-2-E	TLDFELIKTEAKQPA
27	7	225	DENV-2-E	DFELIKTEAKQPATL
28	7	226	DENV-2-E	ELIKTEAKQPATLRK
29	7	227	DENV-2-E	IKTEAKQPATLRKYC
30	7	228	DENV-2-E	TEAKQPATLRKYCIE
31	7	229	DENV-2-E	AKQPATLRKYCIEAK
32	7	230	DENV-2-E	QPATLRKYCIEAKLT
33	7	231	DENV-2-E	ATLRKYCIEAKLTNT
34	7	232	DENV-2-E	LRKYCIEAKLTNTTT
35	7	233	DENV-2-E	KYCIEAKLTNTTTES
36	7	234	DENV-2-E	CIEAKLTNTTTESRC
37	7	235	DENV-2-E	EAKLTNTTTESRCPT
38	7	236	DENV-2-E	KLTNTTTESRCPTQG
39	7	237	DENV-2-E	TNTTTESRCPTQGEP
40	7	238	DENV-2-E	TTTESRCPTQGEPSL
41	7	239	DENV-2-E	TESRCPTQGEPSLNE
42	7	240	DENV-2-E	SRCPTQGEPSLNEEQ
43	7	241	DENV-2-E	CPTQGEPSLNEEQDK
44	7	242	DENV-2-E	TQGEPSLNEEQDKRF
45	7	243	DENV-2-E	GEPSLNEEQDKRFIC
46	7	244	DENV-2-E	PSLNEEQDKRFICKH
47	7	245	DENV-2-E	LNEEQDKRFICKHSM
48	7	246	DENV-2-E	EEQDKRFICKHSMVD
49	7	247	DENV-2-E	QDKRFICKHSMVDRG
50	7	248	DENV-2-E	KRFICKHSMVDRGWG
51	7	249	DENV-2-E	FICKHSMVDRGWGNG
52	7	250	DENV-2-E	CKHSMVDRGWGNGCG
53	7	251	DENV-2-E	HSMVDRGWGNGCGLF
54	7	252	DENV-2-E	MVDRGWGNGCGLFGK
55	7	253	DENV-2-E	DRGWGNGCGLFGKGG
56	7	254	DENV-2-E	GWGNGCGLFGKGGIV
57	7	255	DENV-2-E	GNGCGLFGKGGIVTC
58	7	256	DENV-2-E	GCGLFGKGGIVTCAM
59	7	257	DENV-2-E	GLFGKGGIVTCAMFT
60	7	258	DENV-2-E	FGKGGIVTCAMFTCK
61	7	259	DENV-2-E	KGGIVTCAMFTCKKN
62	7	260	DENV-2-E	GIVTCAMFTCKKNME
63	7	261	DENV-2-E	VTCAMFTCKKNMEGK
64	7	262	DENV-2-E	CAMFTCKKNMEGKIV
65	7	263	DENV-2-E	MFTCKKNMEGKIVQP
66	7	264	DENV-2-E	TCKKNMEGKIVQPEN
1	9	265	DENV-2-E	KKNMEGKIVQPENLE
2	9	266	DENV-2-E	NMEGKIVQPENLEYT
3	9	267	DENV-2-E	EGKIVQPENLEYTIV
4	9	268	DENV-2-E	KIVQPENLEYTIVIT
5	9	269	DENV-2-E	VQPENLEYTIVITPH
6	9	270	DENV-2-E	PENLEYTIVITPHSG
7	9	271	DENV-2-E	NLEYTIVITPHSGEE
8	9	272	DENV-2-E	EYTIVITPHSGEEHA
9	9	273	DENV-2-E	TIVITPHSGEEHAVG
10	9	274	DENV-2-E	VITPHSGEEHAVGND
11	9	275	DENV-2-E	TPHSGEEHAVGNDTG
12	9	276	DENV-2-E	HSGEEHAVGNDTGKH
13	9	277	DENV-2-E	GEEHAVGNDTGKHGK
14	9	278	DENV-2-E	EHAVGNDTGKHGKEI
15	9	279	DENV-2-E	AVGNDTGKHGKEIKI
16	9	280	DENV-2-E	GNDTGKHGKEIKITP
17	9	281	DENV-2-E	DTGKHGKEIKITPQS
18	9	282	DENV-2-E	GKHGKEIKITPQSST
19	9	283	DENV-2-E	HGKEIKITPQSSTTE
20	9	284	DENV-2-E	KEIKITPQSSTTEAE
21	9	285	DENV-2-E	IKITPQSSTTEAELT
22	9	286	DENV-2-E	ITPQSSTTEAELTGY
23	9	287	DENV-2-E	PQSSTTEAELTGYGT
24	9	288	DENV-2-E	SSTTEAELTGYGTVT
25	9	289	DENV-2-E	TTEAELTGYGTVTME
26	9	290	DENV-2-E	EAELTGYGTVTMECS
27	9	291	DENV-2-E	ELTGYGTVTMECSPR
28	9	292	DENV-2-E	TGYGTVTMECSPRTG
29	9	293	DENV-2-E	YGTVTMECSPRTGLD
30	9	294	DENV-2-E	TVTMECSPRTGLDFN
31	9	295	DENV-2-E	TMECSPRTGLDFNEM
32	9	296	DENV-2-E	ECSPRTGLDFNEMVL
33	9	297	DENV-2-E	SPRTGLDFNEMVLLQ
34	9	298	DENV-2-E	RTGLDFNEMVLLQME
35	9	299	DENV-2-E	GLDFNEMVLLQMEDK
36	9	300	DENV-2-E	DFNEMVLLQMEDKAW
37	9	301	DENV-2-E	NEMVLLQMEDKAWLV
38	9	302	DENV-2-E	MVLLQMEDKAWLVHR
39	9	303	DENV-2-E	LLQMEDKAWLVHRQW
40	9	304	DENV-2-E	QMEDKAWLVHRQWFL
41	9	305	DENV-2-E	EDKAWLVHRQWFLDL
42	9	306	DENV-2-E	KAWLVHRQWFLDLPL
43	9	307	DENV-2-E	WLVHRQWFLDLPLPW
44	9	308	DENV-2-E	VHRQWFLDLPLPWLP
45	9	309	DENV-2-E	RQWFLDLPLPWLPGA
46	9	310	DENV-2-E	WFLDLPLPWLPGADT
47	9	311	DENV-2-E	LDLPLPWLPGADTQG
48	9	312	DENV-2-E	LPLPWLPGADTQGSN
49	9	313	DENV-2-E	LPWLPGADTQGSNWI
50	9	314	DENV-2-E	WLPGADTQGSNWIQK
51	9	315	DENV-2-E	PGADTQGSNWIQKET
52	9	316	DENV-2-E	ADTQGSNWIQKETLV
53	9	317	DENV-2-E	TQGSNWIQKETLVTF
54	9	318	DENV-2-E	GSNWIQKETLVTFKN
55	9	319	DENV-2-E	NWIQKETLVTFKNPH
56	9	320	DENV-2-E	IQKETLVTFKNPHAK
57	9	321	DENV-2-E	KETLVTFKNPHAKKQ
58	9	322	DENV-2-E	TLVTFKNPHAKKQDV
59	9	323	DENV-2-E	VTFKNPHAKKQDVVV
60	9	324	DENV-2-E	FKNPHAKKQDVVVLG
61	9	325	DENV-2-E	NPHAKKQDVVVLGSQ
62	9	326	DENV-2-E	HAKKQDVVVLGSQEG
63	9	327	DENV-2-E	KKQDVVVLGSQEGAM
64	9	328	DENV-2-E	QDVVVLGSQEGAMHT
65	9	329	DENV-2-E	VVVLGSQEGAMHTAL
66	9	330	DENV-2-E	VLGSQEGAMHTALTG
1	11	331	DENV-2-E	GSQEGAMHTALTGAT
2	11	332	DENV-2-E	QEGAMHTALTGATEI
3	11	333	DENV-2-E	GAMHTALTGATEIQM
4	11	334	DENV-2-E	MHTALTGATEIQMSS
5	11	335	DENV-2-E	TALTGATEIQMSSGN
6	11	336	DENV-2-E	LTGATEIQMSSGNLL
7	11	337	DENV-2-E	GATEIQMSSGNLLFT
8	11	338	DENV-2-E	TEIQMSSGNLLFTGH
9	11	339	DENV-2-E	IQMSSGNLLFTGHLK
10	11	340	DENV-2-E	MSSGNLLFTGHLKCR
11	11	341	DENV-2-E	SGNLLFTGHLKCRLR
12	11	342	DENV-2-E	NLLFTGHLKCRLRMD
13	11	343	DENV-2-E	LFTGHLKCRLRMDKL
14	11	344	DENV-2-E	TGHLKCRLRMDKLQL
15	11	345	DENV-2-E	HLKCRLRMDKLQLKG
16	11	346	DENV-2-E	KCRLRMDKLQLKGMS
17	11	347	DENV-2-E	RLRMDKLQLKGMSYS
18	11	348	DENV-2-E	RMDKLQLKGMSYSMC
19	11	349	DENV-2-E	DKLQLKGMSYSMCTG
20	11	350	DENV-2-E	LQLKGMSYSMCTGKF
21	11	351	DENV-2-E	LKGMSYSMCTGKFKI
22	11	352	DENV-2-E	GMSYSMCTGKFKIVK
23	11	353	DENV-2-E	SYSMCTGKFKIVKEI
24	11	354	DENV-2-E	SMCTGKFKIVKEIAE
25	11	355	DENV-2-E	CTGKFKIVKEIAETQ
26	11	356	DENV-2-E	GKFKIVKEIAETQHG
27	11	357	DENV-2-E	FKIVKEIAETQHGTI
28	11	358	DENV-2-E	IVKEIAETQHGTIVI
29	11	359	DENV-2-E	KEIAETQHGTIVIRV
30	11	360	DENV-2-E	IAETQHGTIVIRVQY
31	11	361	DENV-2-E	ETQHGTIVIRVQYEG
32	11	362	DENV-2-E	QHGTIVIRVQYEGDG
33	11	363	DENV-2-E	GTIVIRVQYEGDGSP
34	11	364	DENV-2-E	IVIRVQYEGDGSPCK
35	11	365	DENV-2-E	IRVQYEGDGSPCKIP
36	11	366	DENV-2-E	VQYEGDGSPCKIPFE
37	11	367	DENV-2-E	YEGDGSPCKIPFEIT
38	11	368	DENV-2-E	GDGSPCKIPFEITDL
39	11	369	DENV-2-E	GSPCKIPFEITDLEK
40	11	370	DENV-2-E	PCKIPFEITDLEKRH
41	11	371	DENV-2-E	KIPFEITDLEKRHVL
42	11	372	DENV-2-E	PFEITDLEKRHVLGR
43	11	373	DENV-2-E	EITDLEKRHVLGRLI
44	11	374	DENV-2-E	TDLEKRHVLGRLITV
45	11	375	DENV-2-E	LEKRHVLGRLITVNP
46	11	376	DENV-2-E	KRHVLGRLITVNPIV
47	11	377	DENV-2-E	HVLGRLITVNPIVTE
48	11	378	DENV-2-E	LGRLITVNPIVTEKD
49	11	379	DENV-2-E	RLITVNPIVTEKDSP
50	11	380	DENV-2-E	ITVNPIVTEKDSPVN
51	11	381	DENV-2-E	VNPIVTEKDSPVNIE
52	11	382	DENV-2-E	PIVTEKDSPVNIEAE
53	11	383	DENV-2-E	VTEKDSPVNIEAEPP
54	11	384	DENV-2-E	EKDSPVNIEAEPPFG
55	11	385	DENV-2-E	DSPVNIEAEPPFGDS
56	11	386	DENV-2-E	PVNIEAEPPFGDSYI
57	11	387	DENV-2-E	NIEAEPPFGDSYIIV
58	11	388	DENV-2-E	EAEPPFGDSYIIVGV
59	11	389	DENV-2-E	EPPFGDSYIIVGVEP
60	11	390	DENV-2-E	PFGDSYIIVGVEPGQ
61	11	391	DENV-2-E	GDSYIIVGVEPGQLK
62	11	392	DENV-2-E	SYIIVGVEPGQLKLN
63	11	393	DENV-2-E	IIVGVEPGQLKLNWF
64	11	394	DENV-2-E	VGVEPGQLKLNWFKG
65	11	395	DENV-2-E	VEPGQLKLNWFKGSG
66	11	396	DENV-2-E	PGQLKLNWFKGSGSG
1	13	397	DENV-2-E	QLKLNWFKGSGSGSG
2	13	398	DENV-2/3-E	KLNWFKGSGSGSGMR
3	13	399	DENV-2/3-E	NWFKGSGSGSGMRCV
4	13	400	DENV-2/3-E	FKGSGSGSGMRCVGV
5	13	401	DENV-3-E	GSGSGSGMRCVGVGN
6	13	402	DENV-3-E	GSGSGMRCVGVGNRD
7	13	403	DENV-3-E	GSGMRCVGVGNRDFV
8	13	404	DENV-3-E	GMRCVGVGNRDFVEG
9	13	405	DENV-3-E	RCVGVGNRDFVEGLS
10	13	406	DENV-3-E	VGVGNRDFVEGLSGA
11	13	407	DENV-3-E	VGNRDFVEGLSGATW
12	13	408	DENV-3-E	NRDFVEGLSGATWVD
13	13	409	DENV-3-E	DFVEGLSGATWVDVV
14	13	410	DENV-3-E	VEGLSGATWVDVVLE
15	13	411	DENV-3-E	GLSGATWVDVVLEHG
16	13	412	DENV-3-E	SGATWVDVVLEHGGC
17	13	413	DENV-3-E	ATWVDVVLEHGGCVT
18	13	414	DENV-3-E	WVDVVLEHGGCVTTM
19	13	415	DENV-3-E	DVVLEHGGCVTTMAK
20	13	416	DENV-3-E	VLEHGGCVTTMAKNK
21	13	417	DENV-3-E	EHGGCVTTMAKNKPT
22	13	418	DENV-3-E	GGCVTTMAKNKPTLD
23	13	419	DENV-3-E	CVTTMAKNKPTLDIE
24	13	420	DENV-3-E	TTMAKNKPTLDIELQ
25	13	421	DENV-3-E	MAKNKPTLDIELQKT
26	13	422	DENV-3-E	KNKPTLDIELQKTEA
27	13	423	DENV-3-E	KPTLDIELQKTEATQ
28	13	424	DENV-3-E	TLDIELQKTEATQLA
29	13	425	DENV-3-E	DIELQKTEATQLATL
30	13	426	DENV-3-E	ELQKTEATQLATLRK
31	13	427	DENV-3-E	QKTEATQLATLRKLC
32	13	428	DENV-3-E	TEATQLATLRKLCIE
33	13	429	DENV-3-E	ATQLATLRKLCIEGK
34	13	430	DENV-3-E	QLATLRKLCIEGKIT
35	13	431	DENV-3-E	ATLRKLCIEGKITNI
36	13	432	DENV-3-E	LRKLCIEGKITNITT
37	13	433	DENV-3-E	KLCIEGKITNITTDS
38	13	434	DENV-3-E	CIEGKITNITTDSRC
39	13	435	DENV-3-E	EGKITNITTDSRCPT
40	13	436	DENV-3-E	KITNITTDSRCPTQG
41	13	437	DENV-3-E	TNITTDSRCPTQGEA
42	13	438	DENV-3-E	ITTDSRCPTQGEAVL
43	13	439	DENV-3-E	TDSRCPTQGEAVLPE
44	13	440	DENV-3-E	SRCPTQGEAVLPEEQ
45	13	441	DENV-3-E	CPTQGEAVLPEEQDQ
46	13	442	DENV-3-E	TQGEAVLPEEQDQNY
47	13	443	DENV-3-E	GEAVLPEEQDQNYVC
48	13	444	DENV-3-E	AVLPEEQDQNYVCKH
49	13	445	DENV-3-E	LPEEQDQNYVCKHTY
50	13	446	DENV-3-E	EEQDQNYVCKHTYVD
51	13	447	DENV-3-E	QDQNYVCKHTYVDRG
52	13	448	DENV-3-E	QNYVCKHTYVDRGWG
53	13	449	DENV-3-E	YVCKHTYVDRGWGNG
54	13	450	DENV-3-E	CKHTYVDRGWGNGCG
55	13	451	DENV-3-E	HTYVDRGWGNGCGLF
56	13	452	DENV-3-E	YVDRGWGNGCGLFGK
57	13	453	DENV-3-E	DRGWGNGCGLFGKGS
58	13	454	DENV-3-E	GWGNGCGLFGKGSLV
59	13	455	DENV-3-E	GNGCGLFGKGSLVTC
60	13	456	DENV-3-E	GCGLFGKGSLVTCAK
61	13	457	DENV-3-E	GLFGKGSLVTCAKFQ
62	13	458	DENV-3-E	FGKGSLVTCAKFQCL
63	13	459	DENV-3-E	KGSLVTCAKFQCLEP
64	13	460	DENV-3-E	SLVTCAKFQCLEPIE
65	13	461	DENV-3-E	VTCAKFQCLEPIEGK
66	13	462	DENV-3-E	CAKFQCLEPIEGKVV
1	15	463	DENV-3-E	KFQCLEPIEGKVVQY
2	15	464	DENV-3-E	QCLEPIEGKVVQYEN
3	15	465	DENV-3-E	LEPIEGKVVQYENLK
4	15	466	DENV-3-E	PIEGKVVQYENLKYT
5	15	467	DENV-3-E	EGKVVQYENLKYTVI
6	15	468	DENV-3-E	KVVQYENLKYTVIIT
7	15	469	DENV-3-E	VQYENLKYTVIITVH
8	15	470	DENV-3-E	YENLKYTVIITVHTG
9	15	471	DENV-3-E	NLKYTVIITVHTGDQ
10	15	472	DENV-3-E	KYTVIITVHTGDQHQ
11	15	473	DENV-3-E	TVIITVHTGDQHQVG
12	15	474	DENV-3-E	IITVHTGDQHQVGNE
13	15	475	DENV-3-E	TVHTGDQHQVGNETQ
14	15	476	DENV-3-E	HTGDQHQVGNETQGV
15	15	477	DENV-3-E	GDQHQVGNETQGVTA
16	15	478	DENV-3-E	QHQVGNETQGVTAEI
17	15	479	DENV-3-E	QVGNETQGVTAEITP
18	15	480	DENV-3-E	GNETQGVTAEITPQA
19	15	481	DENV-3-E	ETQGVTAEITPQAST
20	15	482	DENV-3-E	QGVTAEITPQASTTE
21	15	483	DENV-3-E	VTAEITPQASTTEAI
22	15	484	DENV-3-E	AEITPQASTTEAILP
23	15	485	DENV-3-E	ITPQASTTEAILPEY
24	15	486	DENV-3-E	PQASTTEAILPEYGT
25	15	487	DENV-3-E	ASTTEAILPEYGTLG
26	15	488	DENV-3-E	TTEAILPEYGTLGLE
27	15	489	DENV-3-E	EAILPEYGTLGLECS
28	15	490	DENV-3-E	ILPEYGTLGLECSPR
29	15	491	DENV-3-E	PEYGTLGLECSPRTG
30	15	492	DENV-3-E	YGTLGLECSPRTGLD
31	15	493	DENV-3-E	TLGLECSPRTGLDFN
32	15	494	DENV-3-E	GLECSPRTGLDFNEM
33	15	495	DENV-3-E	ECSPRTGLDFNEMIL
34	15	496	DENV-3-E	SPRTGLDFNEMILLT
35	15	497	DENV-3-E	RTGLDFNEMILLTMK
36	15	498	DENV-3-E	GLDFNEMILLTMKNK
37	15	499	DENV-3-E	DFNEMILLTMKNKAW
38	15	500	DENV-3-E	NEMILLTMKNKAWMV
39	15	501	DENV-3-E	MILLTMKNKAWMVHR
40	15	502	DENV-3-E	LLTMKNKAWMVHRQW
41	15	503	DENV-3-E	TMKNKAWMVHRQWFF
42	15	504	DENV-3-E	KNKAWMVHRQWFFDL
43	15	505	DENV-3-E	KAWMVHRQWFFDLPL
44	15	506	DENV-3-E	WMVHRQWFFDLPLPW
45	15	507	DENV-3-E	VHRQWFFDLPLPWTS
46	15	508	DENV-3-E	RQWFFDLPLPWTSGA
47	15	509	DENV-3-E	WFFDLPLPWTSGATA
48	15	510	DENV-3-E	FDLPLPWTSGATAET
49	15	511	DENV-3-E	LPLPWTSGATAETPT
50	15	512	DENV-3-E	LPWTSGATAETPTWN
51	15	513	DENV-3-E	WTSGATAETPTWNRK
52	15	514	DENV-3-E	SGATAETPTWNRKEL
53	15	515	DENV-3-E	ATAETPTWNRKELLV
54	15	516	DENV-3-E	AETPTWNRKELLVTF
55	15	517	DENV-3-E	TPTWNRKELLVTFKN
56	15	518	DENV-3-E	TWNRKELLVTFKNAH
57	15	519	DENV-3-E	NRKELLVTFKNAHAK
58	15	520	DENV-3-E	KELLVTFKNAHAKKQ
59	15	521	DENV-3-E	LLVTFKNAHAKKQEV
60	15	522	DENV-3-E	VTFKNAHAKKQEVVV
61	15	523	DENV-3-E	FKNAHAKKQEVVVLG
62	15	524	DENV-3-E	NAHAKKQEVVVLGSQ
63	15	525	DENV-3-E	HAKKQEVVVLGSQEG
64	15	526	DENV-3-E	KKQEVVVLGSQEGAM
65	15	527	DENV-3-E	QEVVVLGSQEGAMHT
66	15	528	DENV-3-E	VVVLGSQEGAMHTAL
1	17	529	DENV-3-E	VLGSQEGAMHTALTG
2	17	530	DENV-3-E	GSQEGAMHTALTGAT
3	17	531	DENV-3-E	QEGAMHTALTGATEI
4	17	532	DENV-3-E	GAMHTALTGATEIQN
5	17	533	DENV-3-E	MHTALTGATEIQNSG
6	17	534	DENV-3-E	TALTGATEIQNSGGT
7	17	535	DENV-3-E	LTGATEIQNSGGTSI
8	17	536	DENV-3-E	GATEIQNSGGTSIFA
9	17	537	DENV-3-E	TEIQNSGGTSIFAGH
10	17	538	DENV-3-E	IQNSGGTSIFAGHLK
11	17	539	DENV-3-E	NSGGTSIFAGHLKCR
12	17	540	DENV-3-E	GGTSIFAGHLKCRLK
13	17	541	DENV-3-E	TSIFAGHLKCRLKMD
14	17	542	DENV-3-E	IFAGHLKCRLKMDKL
15	17	543	DENV-3-E	AGHLKCRLKMDKLEL
16	17	544	DENV-3-E	HLKCRLKMDKLELKG
17	17	545	DENV-3-E	KCRLKMDKLELKGMS
18	17	546	DENV-3-E	RLKMDKLELKGMSYA
19	17	547	DENV-3-E	KMDKLELKGMSYAMC
20	17	548	DENV-3-E	DKLELKGMSYAMCTN
21	17	549	DENV-3-E	LELKGMSYAMCTNTF
22	17	550	DENV-3-E	LKGMSYAMCTNTFVL
23	17	551	DENV-3-E	GMSYAMCTNTFVLKK
24	17	552	DENV-3-E	SYAMCTNTFVLKKEV
25	17	553	DENV-3-E	AMCTNTFVLKKEVSE
26	17	554	DENV-3-E	CTNTFVLKKEVSETQ
27	17	555	DENV-3-E	NTFVLKKEVSETQHG
28	17	556	DENV-3-E	FVLKKEVSETQHGTI
29	17	557	DENV-3-E	LKKEVSETQHGTILI
30	17	558	DENV-3-E	KEVSETQHGTILIKV
31	17	559	DENV-3-E	VSETQHGTILIKVEY
32	17	560	DENV-3-E	ETQHGTILIKVEYKG
33	17	561	DENV-3-E	QHGTILIKVEYKGED
34	17	562	DENV-3-E	GTILIKVEYKGEDAP
35	17	563	DENV-3-E	ILIKVEYKGEDAPCK
36	17	564	DENV-3-E	IKVEYKGEDAPCKIP
37	17	565	DENV-3-E	VEYKGEDAPCKIPFS
38	17	566	DENV-3-E	YKGEDAPCKIPFSTE
39	17	567	DENV-3-E	GEDAPCKIPFSTEDG
40	17	568	DENV-3-E	DAPCKIPFSTEDGQG
41	17	569	DENV-3-E	PCKIPFSTEDGQGKA
42	17	570	DENV-3-E	KIPFSTEDGQGKAHN
43	17	571	DENV-3-E	PFSTEDGQGKAHNGR
44	17	572	DENV-3-E	STEDGQGKAHNGRLI
45	17	573	DENV-3-E	EDGQGKAHNGRLITA
46	17	574	DENV-3-E	GQGKAHNGRLITANP
47	17	575	DENV-3-E	GKAHNGRLITANPVV
48	17	576	DENV-3-E	AHNGRLITANPVVTK
49	17	577	DENV-3-E	NGRLITANPVVTKKE
50	17	578	DENV-3-E	RLITANPVVTKKEEP
51	17	579	DENV-3-E	ITANPVVTKKEEPVN
52	17	580	DENV-3-E	ANPVVTKKEEPVNIE
53	17	581	DENV-3-E	PVVTKKEEPVNIEAE
54	17	582	DENV-3-E	VTKKEEPVNIEAEPP
55	17	583	DENV-3-E	KKEEPVNIEAEPPFG
56	17	584	DENV-3-E	EEPVNIEAEPPFGES
57	17	585	DENV-3-E	PVNIEAEPPFGESNI
58	17	586	DENV-3-E	NIEAEPPFGESNIVI
59	17	587	DENV-3-E	EAEPPFGESNIVIGI
60	17	588	DENV-3-E	EPPFGESNIVIGIGD
61	17	589	DENV-3-E	PFGESNIVIGIGDNA
62	17	590	DENV-3-E	GESNIVIGIGDNALK
63	17	591	DENV-3-E	SNIVIGIGDNALKIN
64	17	592	DENV-3-E	IVIGIGDNALKINWY
65	17	593	DENV-3-E	IGIGDNALKINWYKG
66	17	594	DENV-3-E	IGDNALKINWYKGSG
1	19	595	DENV-3-E	DNALKINWYKGSGSG
2	19	596	DENV-3-E	ALKINWYKGSGSGSG
3	19	597	DENV-3/4-E	KINWYKGSGSGSGMR
4	19	598	DENV-3/4-E	NWYKGSGSGSGMRCV
5	19	599	DENV-3/4-E	YKGSGSGSGMRCVGV
6	19	600	DENV-4-E	GSGSGSGMRCVGVGN
7	19	601	DENV-4-E	GSGSGMRCVGVGNRD
8	19	602	DENV-4-E	GSGMRCVGVGNRDFV
9	19	603	DENV-4-E	GMRCVGVGNRDFVEG
10	19	604	DENV-4-E	RCVGVGNRDFVEGVS
11	19	605	DENV-4-E	VGVGNRDFVEGVSGG
12	19	606	DENV-4-E	VGNRDFVEGVSGGAW
13	19	607	DENV-4-E	NRDFVEGVSGGAWVD
14	19	608	DENV-4-E	DFVEGVSGGAWVDLV
15	19	609	DENV-4-E	VEGVSGGAWVDLVLE
16	19	610	DENV-4-E	GVSGGAWVDLVLEHG
17	19	611	DENV-4-E	SGGAWVDLVLEHGGC
18	19	612	DENV-4-E	GAWVDLVLEHGGCVT
19	19	613	DENV-4-E	WVDLVLEHGGCVTTM
20	19	614	DENV-4-E	DLVLEHGGCVTTMAQ
21	19	615	DENV-4-E	VLEHGGCVTTMAQGK
22	19	616	DENV-4-E	EHGGCVTTMAQGKPT
23	19	617	DENV-4-E	GGCVTTMAQGKPTLD
24	19	618	DENV-4-E	CVTTMAQGKPTLDFE
25	19	619	DENV-4-E	TTMAQGKPTLDFELT
26	19	620	DENV-4-E	MAQGKPTLDFELTKT
27	19	621	DENV-4-E	QGKPTLDFELTKTTA
28	19	622	DENV-4-E	KPTLDFELTKTTAKE
29	19	623	DENV-4-E	TLDFELTKTTAKEVA
30	19	624	DENV-4-E	DFELTKTTAKEVALL
31	19	625	DENV-4-E	ELTKTTAKEVALLRT
32	19	626	DENV-4-E	TKTTAKEVALLRTYC
33	19	627	DENV-4-E	TTAKEVALLRTYCIE
34	19	628	DENV-4-E	AKEVALLRTYCIEAL
35	19	629	DENV-4-E	EVALLRTYCIEALIS
36	19	630	DENV-4-E	ALLRTYCIEALISNI
37	19	631	DENV-4-E	LRTYCIEALISNITT
38	19	632	DENV-4-E	TYCIEALISNITTAT
39	19	633	DENV-4-E	CIEALISNITTATRC
40	19	634	DENV-4-E	EALISNITTATRCPT
41	19	635	DENV-4-E	LISNITTATRCPTQG
42	19	636	DENV-4-E	SNITTATRCPTQGEP
43	19	637	DENV-4-E	ITTATRCPTQGEPYL
44	19	638	DENV-4-E	TATRCPTQGEPYLKE
45	19	639	DENV-4-E	TRCPTQGEPYLKEEQ
46	19	640	DENV-4-E	CPTQGEPYLKEEQDQ
47	19	641	DENV-4-E	TQGEPYLKEEQDQQY
48	19	642	DENV-4-E	GEPYLKEEQDQQYIC
49	19	643	DENV-4-E	PYLKEEQDQQYICRR
50	19	644	DENV-4-E	LKEEQDQQYICRRDV
51	19	645	DENV-4-E	EEQDQQYICRRDVVD
52	19	646	DENV-4-E	QDQQYICRRDVVDRG
53	19	647	DENV-4-E	QQYICRRDVVDRGWG
54	19	648	DENV-4-E	YICRRDVVDRGWGNG
55	19	649	DENV-4-E	CRRDVVDRGWGNGCG
56	19	650	DENV-4-E	RDVVDRGWGNGCGLF
57	19	651	DENV-4-E	VVDRGWGNGCGLFGK
58	19	652	DENV-4-E	DRGWGNGCGLFGKGG
59	19	653	DENV-4-E	GWGNGCGLFGKGGVV
60	19	654	DENV-4-E	GNGCGLFGKGGVVTC
61	19	655	DENV-4-E	GCGLFGKGGVVTCAK
62	19	656	DENV-4-E	GLFGKGGVVTCAKFS
63	19	657	DENV-4-E	FGKGGVVTCAKFSCS
64	19	658	DENV-4-E	KGGVVTCAKFSCSGK
65	19	659	DENV-4-E	GVVTCAKFSCSGKIT
66	19	660	DENV-4-E	VTCAKFSCSGKITGN
1	21	661	DENV-4-E	CAKFSCSGKITGNLV
2	21	662	DENV-4-E	KFSCSGKITGNLVQI
3	21	663	DENV-4-E	SCSGKITGNLVQIEN
4	21	664	DENV-4-E	SGKITGNLVQIENLE
5	21	665	DENV-4-E	KITGNLVQIENLEYT
6	21	666	DENV-4-E	TGNLVQIENLEYTVV
7	21	667	DENV-4-E	NLVQIENLEYTVVVT
8	21	668	DENV-4-E	VQIENLEYTVVVTVH
9	21	669	DENV-4-E	IENLEYTVVVTVHNG
10	21	670	DENV-4-E	NLEYTVVVTVHNGDT
11	21	671	DENV-4-E	EYTVVVTVHNGDTHA
12	21	672	DENV-4-E	TVVVTVHNGDTHAVG
13	21	673	DENV-4-E	VVTVHNGDTHAVGND
14	21	674	DENV-4-E	TVHNGDTHAVGNDTS
15	21	675	DENV-4-E	HNGDTHAVGNDTSNH
16	21	676	DENV-4-E	GDTHAVGNDTSNHGV
17	21	677	DENV-4-E	THAVGNDTSNHGVTA
18	21	678	DENV-4-E	AVGNDTSNHGVTATI
19	21	679	DENV-4-E	GNDTSNHGVTATITP
20	21	680	DENV-4-E	DTSNHGVTATITPRS
21	21	681	DENV-4-E	SNHGVTATITPRSPS
22	21	682	DENV-4-E	HGVTATITPRSPSVE
23	21	683	DENV-4-E	VTATITPRSPSVEVK
24	21	684	DENV-4-E	ATITPRSPSVEVKLP
25	21	685	DENV-4-E	ITPRSPSVEVKLPDY
26	21	686	DENV-4-E	PRSPSVEVKLPDYGE
27	21	687	DENV-4-E	SPSVEVKLPDYGELT
28	21	688	DENV-4-E	SVEVKLPDYGELTLD
29	21	689	DENV-4-E	EVKLPDYGELTLDCE
30	21	690	DENV-4-E	KLPDYGELTLDCEPR
31	21	691	DENV-4-E	PDYGELTLDCEPRSG
32	21	692	DENV-4-E	YGELTLDCEPRSGID
33	21	693	DENV-4-E	ELTLDCEPRSGIDFN
34	21	694	DENV-4-E	TLDCEPRSGIDFNEM
35	21	695	DENV-4-E	DCEPRSGIDFNEMIL
36	21	696	DENV-4-E	EPRSGIDFNEMILMK
37	21	697	DENV-4-E	RSGIDFNEMILMKMK
38	21	698	DENV-4-E	GIDFNEMILMKMKKK
39	21	699	DENV-4-E	DFNEMILMKMKKKTW
40	21	700	DENV-4-E	NEMILMKMKKKTWLV
41	21	701	DENV-4-E	MILMKMKKKTWLVHK
42	21	702	DENV-4-E	LMKMKKKTWLVHKQW
43	21	703	DENV-4-E	KMKKKTWLVHKQWFL
44	21	704	DENV-4-E	KKKTWLVHKQWFLDL
45	21	705	DENV-4-E	KTWLVHKQWFLDLPL
46	21	706	DENV-4-E	WLVHKQWFLDLPLPW
47	21	707	DENV-4-E	VHKQWFLDLPLPWTT
48	21	708	DENV-4-E	KQWFLDLPLPWTTGA
49	21	709	DENV-4-E	WFLDLPLPWTTGADT
50	21	710	DENV-4-E	LDLPLPWTTGADTSE
51	21	711	DENV-4-E	LPLPWTTGADTSEVH
52	21	712	DENV-4-E	LPWTTGADTSEVHWN
53	21	713	DENV-4-E	WTTGADTSEVHWNYK
54	21	714	DENV-4-E	TGADTSEVHWNYKER
55	21	715	DENV-4-E	ADTSEVHWNYKERMV
56	21	716	DENV-4-E	TSEVHWNYKERMVTF
57	21	717	DENV-4-E	EVHWNYKERMVTFKV
58	21	718	DENV-4-E	HWNYKERMVTFKVPH
59	21	719	DENV-4-E	NYKERMVTFKVPHAK
60	21	720	DENV-4-E	KERMVTFKVPHAKRQ
61	21	721	DENV-4-E	RMVTFKVPHAKRQDV
62	21	722	DENV-4-E	VTFKVPHAKRQDVTV
63	21	723	DENV-4-E	FKVPHAKRQDVTVLG
64	21	724	DENV-4-E	VPHAKRQDVTVLGSQ
65	21	725	DENV-4-E	HAKRQDVTVLGSQEG
66	21	726	DENV-4-E	KRQDVTVLGSQEGAM
1	23	727	DENV-4-E	QDVTVLGSQEGAMHS
2	23	728	DENV-4-E	VTVLGSQEGAMHSAL
3	23	729	DENV-4-E	VLGSQEGAMHSALAG
4	23	730	DENV-4-E	GSQEGAMHSALAGAT
5	23	731	DENV-4-E	QEGAMHSALAGATEV
6	23	732	DENV-4-E	GAMHSALAGATEVDS
7	23	733	DENV-4-E	MHSALAGATEVDSGD
8	23	734	DENV-4-E	SALAGATEVDSGDGN
9	23	735	DENV-4-E	LAGATEVDSGDGNHM
10	23	736	DENV-4-E	GATEVDSGDGNHMFA
11	23	737	DENV-4-E	TEVDSGDGNHMFAGH
12	23	738	DENV-4-E	VDSGDGNHMFAGHLK
13	23	739	DENV-4-E	SGDGNHMFAGHLKCK
14	23	740	DENV-4-E	DGNHMFAGHLKCKVR
15	23	741	DENV-4-E	NHMFAGHLKCKVRME
16	23	742	DENV-4-E	MFAGHLKCKVRMEKL
17	23	743	DENV-4-E	AGHLKCKVRMEKLRI
18	23	744	DENV-4-E	HLKCKVRMEKLRIKG
19	23	745	DENV-4-E	KCKVRMEKLRIKGMS
20	23	746	DENV-4-E	KVRMEKLRIKGMSYT
21	23	747	DENV-4-E	RMEKLRIKGMSYTMC
22	23	748	DENV-4-E	EKLRIKGMSYTMCSG
23	23	749	DENV-4-E	LRIKGMSYTMCSGKF
24	23	750	DENV-4-E	IKGMSYTMCSGKFSI
25	23	751	DENV-4-E	GMSYTMCSGKFSIDK
26	23	752	DENV-4-E	SYTMCSGKFSIDKEM
27	23	753	DENV-4-E	TMCSGKFSIDKEMAE
28	23	754	DENV-4-E	CSGKFSIDKEMAETQ
29	23	755	DENV-4-E	GKFSIDKEMAETQHG
30	23	756	DENV-4-E	FSIDKEMAETQHGTT
31	23	757	DENV-4-E	IDKEMAETQHGTTVV
32	23	758	DENV-4-E	KEMAETQHGTTVVKV
33	23	759	DENV-4-E	MAETQHGTTVVKVKY
34	23	760	DENV-4-E	ETQHGTTVVKVKYEG
35	23	761	DENV-4-E	QHGTTVVKVKYEGAG
36	23	762	DENV-4-E	GTTVVKVKYEGAGAP
37	23	763	DENV-4-E	TVVKVKYEGAGAPCK
38	23	764	DENV-4-E	VKVKYEGAGAPCKVP
39	23	765	DENV-4-E	VKYEGAGAPCKVPIE
40	23	766	DENV-4-E	YEGAGAPCKVPIEIR
41	23	767	DENV-4-E	GAGAPCKVPIEIRDV
42	23	768	DENV-4-E	GAPCKVPIEIRDVNK
43	23	769	DENV-4-E	PCKVPIEIRDVNKEK
44	23	770	DENV-4-E	KVPIEIRDVNKEKVV
45	23	771	DENV-4-E	PIEIRDVNKEKVVGR
46	23	772	DENV-4-E	EIRDVNKEKVVGRVI
47	23	773	DENV-4-E	RDVNKEKVVGRVISA
48	23	774	DENV-4-E	VNKEKVVGRVISATP
49	23	775	DENV-4-E	KEKVVGRVISATPLA
50	23	776	DENV-4-E	KVVGRVISATPLAEN
51	23	777	DENV-4-E	VGRVISATPLAENTN
52	23	778	DENV-4-E	RVISATPLAENTNSV
53	23	779	DENV-4-E	ISATPLAENTNSVTN
54	23	780	DENV-4-E	ATPLAENTNSVTNIE
55	23	781	DENV-4-E	PLAENTNSVTNIELE
56	23	782	DENV-4-E	AENTNSVTNIELEPP
57	23	783	DENV-4-E	NTNSVTNIELEPPFG
58	23	784	DENV-4-E	NSVTNIELEPPFGDS
59	23	785	DENV-4-E	VTNIELEPPFGDSYI
60	23	786	DENV-4-E	NIELEPPFGDSYIVI
61	23	787	DENV-4-E	ELEPPFGDSYIVIGV
62	23	788	DENV-4-E	EPPFGDSYIVIGVGN
63	23	789	DENV-4-E	PFGDSYIVIGVGNSA
64	23	790	DENV-4-E	GDSYIVIGVGNSALT
65	23	791	DENV-4-E	SYIVIGVGNSALTLH
66	23	792	DENV-4-E	IVIGVGNSALTLHWF
1	25	793	DENV-4-E	IGVGNSALTLHWFRG
2	25	794	DENV-4-E	VGNSALTLHWFRGSG
3	25	795	DENV-4-E	NSALTLHWFRGSGSG
4	25	796	DENV-4-E	ALTLHWFRGSGSGSG
5	25	797	DENV-4/ZIKV-E	TLHWFRGSGSGSGMR
6	25	798	DENV-4/ZIKV-E	HWFRGSGSGSGMRCI
7	25	799	DENV-4/ZIKV-E	FRGSGSGSGMRCIGV
8	25	800	ZIKV-E	GSGSGSGMRCIGVSN
9	25	801	ZIKV-E	GSGSGMRCIGVSNRD
10	25	802	ZIKV-E	GSGMRCIGVSNRDFV
11	25	803	ZIKV-E	GMRCIGVSNRDFVEG
12	25	804	ZIKV-E	RCIGVSNRDFVEGMS
13	25	805	ZIKV-E	IGVSNRDFVEGMSGG
14	25	806	ZIKV-E	VSNRDFVEGMSGGTW
15	25	807	ZIKV-E	NRDFVEGMSGGTWVD
16	25	808	ZIKV-E	DFVEGMSGGTWVDVV
17	25	809	ZIKV-E	VEGMSGGTWVDVVLE
18	25	810	ZIKV-E	GMSGGTWVDVVLEHG
19	25	811	ZIKV-E	SGGTWVDVVLEHGGC
20	25	812	ZIKV-E	GTWVDVVLEHGGCVT
21	25	813	ZIKV-E	WVDVVLEHGGCVTVM
22	25	814	ZIKV-E	DVVLEHGGCVTVMAQ
23	25	815	ZIKV-E	VLEHGGCVTVMAQDK
24	25	816	ZIKV-E	EHGGCVTVMAQDKPT
25	25	817	ZIKV-E	GGCVTVMAQDKPTVD
26	25	818	ZIKV-E	CVTVMAQDKPTVDIE
27	25	819	ZIKV-E	TVMAQDKPTVDIELV
28	25	820	ZIKV-E	MAQDKPTVDIELVTT
29	25	821	ZIKV-E	QDKPTVDIELVTTTV
30	25	822	ZIKV-E	KPTVDIELVTTTVSN
31	25	823	ZIKV-E	TVDIELVTTTVSNMA
32	25	824	ZIKV-E	DIELVTTTVSNMAEV
33	25	825	ZIKV-E	ELVTTTVSNMAEVRS
34	25	826	ZIKV-E	VTTTVSNMAEVRSYC
35	25	827	ZIKV-E	TTVSNMAEVRSYCYE
36	25	828	ZIKV-E	VSNMAEVRSYCYEAS
37	25	829	ZIKV-E	NMAEVRSYCYEASIS
38	25	830	ZIKV-E	AEVRSYCYEASISDM
39	25	831	ZIKV-E	VRSYCYEASISDMAS
40	25	832	ZIKV-E	SYCYEASISDMASDS
41	25	833	ZIKV-E	CYEASISDMASDSRC
42	25	834	ZIKV-E	EASISDMASDSRCPT
43	25	835	ZIKV-E	SISDMASDSRCPTQG
44	25	836	ZIKV-E	SDMASDSRCPTQGEA
45	25	837	ZIKV-E	MASDSRCPTQGEAYL
46	25	838	ZIKV-E	SDSRCPTQGEAYLDK
47	25	839	ZIKV-E	SRCPTQGEAYLDKQS
48	25	840	ZIKV-E	CPTQGEAYLDKQSDT
49	25	841	ZIKV-E	TQGEAYLDKQSDTQY
50	25	842	ZIKV-E	GEAYLDKQSDTQYVC
51	25	843	ZIKV-E	AYLDKQSDTQYVCKR
52	25	844	ZIKV-E	LDKQSDTQYVCKRTL
53	25	845	ZIKV-E	KQSDTQYVCKRTLVD
54	25	846	ZIKV-E	SDTQYVCKRTLVDRG
55	25	847	ZIKV-E	TQYVCKRTLVDRGWG
56	25	848	ZIKV-E	YVCKRTLVDRGWGNG
57	25	849	ZIKV-E	CKRTLVDRGWGNGCG
58	25	850	ZIKV-E	RTLVDRGWGNGCGLF
59	25	851	ZIKV-E	LVDRGWGNGCGLFGK
60	25	852	ZIKV-E	DRGWGNGCGLFGKGS
61	25	853	ZIKV-E	GWGNGCGLFGKGSLV
62	25	854	ZIKV-E	GNGCGLFGKGSLVTC
63	25	855	ZIKV-E	GCGLFGKGSLVTCAK
64	25	856	ZIKV-E	GLFGKGSLVTCAKFA
65	25	857	ZIKV-E	FGKGSLVTCAKFACS
66	25	858	ZIKV-E	KGSLVTCAKFACSKK
1	27	859	ZIKV-E	SLVTCAKFACSKKMT
2	27	860	ZIKV-E	VTCAKFACSKKMTGK
3	27	861	ZIKV-E	CAKFACSKKMTGKSI
4	27	862	ZIKV-E	KFACSKKMTGKSIQP
5	27	863	ZIKV-E	ACSKKMTGKSIQPEN
6	27	864	ZIKV-E	SKKMTGKSIQPENLE
7	27	865	ZIKV-E	KMTGKSIQPENLEYR
8	27	866	ZIKV-E	TGKSIQPENLEYRIM
9	27	867	ZIKV-E	KSIQPENLEYRIMLS
10	27	868	ZIKV-E	IQPENLEYRIMLSVH
11	27	869	ZIKV-E	PENLEYRIMLSVHGS
12	27	870	ZIKV-E	NLEYRIMLSVHGSQH
13	27	871	ZIKV-E	EYRIMLSVHGSQHSG
14	27	872	ZIKV-E	RIMLSVHGSQHSGMI
15	27	873	ZIKV-E	MLSVHGSQHSGMIVN
16	27	874	ZIKV-E	SVHGSQHSGMIVNDT
17	27	875	ZIKV-E	HGSQHSGMIVNDTGH
18	27	876	ZIKV-E	SQHSGMIVNDTGHET
19	27	877	ZIKV-E	HSGMIVNDTGHETDE
20	27	878	ZIKV-E	GMIVNDTGHETDENR
21	27	879	ZIKV-E	IVNDTGHETDENRAK
22	27	880	ZIKV-E	NDTGHETDENRAKVE
23	27	881	ZIKV-E	TGHETDENRAKVEIT
24	27	882	ZIKV-E	HETDENRAKVEITPN
25	27	883	ZIKV-E	TDENRAKVEITPNSP
26	27	884	ZIKV-E	ENRAKVEITPNSPRA
27	27	885	ZIKV-E	RAKVEITPNSPRAEA
28	27	886	ZIKV-E	KVEITPNSPRAEATL
29	27	887	ZIKV-E	EITPNSPRAEATLGG
30	27	888	ZIKV-E	TPNSPRAEATLGGFG
31	27	889	ZIKV-E	NSPRAEATLGGFGSL
32	27	890	ZIKV-E	PRAEATLGGFGSLGL
33	27	891	ZIKV-E	AEATLGGFGSLGLDC
34	27	892	ZIKV-E	ATLGGFGSLGLDCEP
35	27	893	ZIKV-E	LGGFGSLGLDCEPRT
36	27	894	ZIKV-E	GFGSLGLDCEPRTGL
37	27	895	ZIKV-E	GSLGLDCEPRTGLDF
38	27	896	ZIKV-E	LGLDCEPRTGLDFSD
39	27	897	ZIKV-E	LDCEPRTGLDFSDLY
40	27	898	ZIKV-E	CEPRTGLDFSDLYYL
41	27	899	ZIKV-E	PRTGLDFSDLYYLTM
42	27	900	ZIKV-E	TGLDFSDLYYLTMNN
43	27	901	ZIKV-E	LDFSDLYYLTMNNKH
44	27	902	ZIKV-E	FSDLYYLTMNNKHWL
45	27	903	ZIKV-E	DLYYLTMNNKHWLVH
46	27	904	ZIKV-E	YYLTMNNKHWLVHKE
47	27	905	ZIKV-E	LTMNNKHWLVHKEWF
48	27	906	ZIKV-E	MNNKHWLVHKEWFHD
49	27	907	ZIKV-E	NKHWLVHKEWFHDIP
50	27	908	ZIKV-E	HWLVHKEWFHDIPLP
51	27	909	ZIKV-E	LVHKEWFHDIPLPWH
52	27	910	ZIKV-E	HKEWFHDIPLPWHAG
53	27	911	ZIKV-E	EWFHDIPLPWHAGAD
54	27	912	ZIKV-E	FHDIPLPWHAGADTG
55	27	913	ZIKV-E	DIPLPWHAGADTGTP
56	27	914	ZIKV-E	PLPWHAGADTGTPHW
57	27	915	ZIKV-E	PWHAGADTGTPHWNN
58	27	916	ZIKV-E	HAGADTGTPHWNNKE
59	27	917	ZIKV-E	GADTGTPHWNNKEAL
60	27	918	ZIKV-E	DTGTPHWNNKEALVE
61	27	919	ZIKV-E	GTPHWNNKEALVEFK
62	27	920	ZIKV-E	PHWNNKEALVEFKDA
63	27	921	ZIKV-E	WNNKEALVEFKDAHA
64	27	922	ZIKV-E	NKEALVEFKDAHAKR
65	27	923	ZIKV-E	EALVEFKDAHAKRQT
66	27	924	ZIKV-E	LVEFKDAHAKRQTVV
1	29	925	ZIKV-E	EFKDAHAKRQTVVVL
2	29	926	ZIKV-E	KDAHAKRQTVVVLGS
3	29	927	ZIKV-E	AHAKRQTVVVLGSQE
4	29	928	ZIKV-E	AKRQTVVVLGSQEGA
5	29	929	ZIKV-E	RQTVVVLGSQEGAVH
6	29	930	ZIKV-E	TVVVLGSQEGAVHTA
7	29	931	ZIKV-E	VVLGSQEGAVHTALA
8	29	932	ZIKV-E	LGSQEGAVHTALAGA
9	29	933	ZIKV-E	SQEGAVHTALAGALE
10	29	934	ZIKV-E	EGAVHTALAGALEAE
11	29	935	ZIKV-E	AVHTALAGALEAEMD
12	29	936	ZIKV-E	HTALAGALEAEMDGA
13	29	937	ZIKV-E	ALAGALEAEMDGAKG
14	29	938	ZIKV-E	AGALEAEMDGAKGRL
15	29	939	ZIKV-E	ALEAEMDGAKGRLSS
16	29	940	ZIKV-E	EAEMDGAKGRLSSGH
17	29	941	ZIKV-E	EMDGAKGRLSSGHLK
18	29	942	ZIKV-E	DGAKGRLSSGHLKCR
19	29	943	ZIKV-E	AKGRLSSGHLKCRLK
20	29	944	ZIKV-E	GRLSSGHLKCRLKMD
21	29	945	ZIKV-E	LSSGHLKCRLKMDKL
22	29	946	ZIKV-E	SGHLKCRLKMDKLRL
23	29	947	ZIKV-E	HLKCRLKMDKLRLKG
24	29	948	ZIKV-E	KCRLKMDKLRLKGVS
25	29	949	ZIKV-E	RLKMDKLRLKGVSYS
26	29	950	ZIKV-E	KMDKLRLKGVSYSLC
27	29	951	ZIKV-E	DKLRLKGVSYSLCTA
28	29	952	ZIKV-E	LRLKGVSYSLCTAAF
29	29	953	ZIKV-E	LKGVSYSLCTAAFTF
30	29	954	ZIKV-E	GVSYSLCTAAFTFTK
31	29	955	ZIKV-E	SYSLCTAAFTFTKIP
32	29	956	ZIKV-E	SLCTAAFTFTKIPAE
33	29	957	ZIKV-E	CTAAFTFTKIPAETL
34	29	958	ZIKV-E	AAFTFTKIPAETLHG
35	29	959	ZIKV-E	FTFTKIPAETLHGTV
36	29	960	ZIKV-E	FTKIPAETLHGTVTV
37	29	961	ZIKV-E	KIPAETLHGTVTVEV
38	29	962	ZIKV-E	PAETLHGTVTVEVQY
39	29	963	ZIKV-E	ETLHGTVTVEVQYAG
40	29	964	ZIKV-E	LHGTVTVEVQYAGTD
41	29	965	ZIKV-E	GTVTVEVQYAGTDGP
42	29	966	ZIKV-E	VTVEVQYAGTDGPCK
43	29	967	ZIKV-E	VEVQYAGTDGPCKVP
44	29	968	ZIKV-E	VQYAGTDGPCKVPAQ
45	29	969	ZIKV-E	YAGTDGPCKVPAQMA
46	29	970	ZIKV-E	GTDGPCKVPAQMAVD
47	29	971	ZIKV-E	DGPCKVPAQMAVDMQ
48	29	972	ZIKV-E	PCKVPAQMAVDMQTL
49	29	973	ZIKV-E	KVPAQMAVDMQTLTP
50	29	974	ZIKV-E	PAQMAVDMQTLTPVG
51	29	975	ZIKV-E	QMAVDMQTLTPVGRL
52	29	976	ZIKV-E	AVDMQTLTPVGRLIT
53	29	977	ZIKV-E	DMQTLTPVGRLITAN
54	29	978	ZIKV-E	QTLTPVGRLITANPV
55	29	979	ZIKV-E	LTPVGRLITANPVIT
56	29	980	ZIKV-E	PVGRLITANPVITES
57	29	981	ZIKV-E	GRLITANPVITESTE
58	29	982	ZIKV-E	LITANPVITESTENS
59	29	983	ZIKV-E	TANPVITESTENSKM
60	29	984	ZIKV-E	NPVITESTENSKMML
61	29	985	ZIKV-E	VITESTENSKMMLEL
62	29	986	ZIKV-E	TESTENSKMMLELDP
63	29	987	ZIKV-E	STENSKMMLELDPPF
64	29	988	ZIKV-E	ENSKMMLELDPPFGD
65	29	989	ZIKV-E	SKMMLELDPPFGDSY
66	29	990	ZIKV-E	MMLELDPPFGDSYIV
1	31	991	ZIKV-E	LELDPPFGDSYIVIG
2	31	992	ZIKV-E	LDPPFGDSYIVIGVG
3	31	993	ZIKV-E	PPFGDSYIVIGVGEK
4	31	994	ZIKV-E	FGDSYIVIGVGEKKI
5	31	995	ZIKV-E	DSYIVIGVGEKKITH
6	31	996	ZIKV-E	YIVIGVGEKKITHHW
7	31	997	ZIKV-E	VIGVGEKKITHHWHR
8	31	998	ZIKV-E	GVGEKKITHHWHRGS
9	31	999	ZIKV-E	GEKKITHHWHRGSGS
10	31	1000	ZIKV-E	KKITHHWHRGSGSGS
11	31	1001	ZIKV-E/DENV-1-NS1	ITHHWHRGSGSGSGD
12	31	1002	ZIKV-E/DENV-1-NS1	HHWHRGSGSGSGDSG
13	31	1003	ZIKV-E/DENV-1-NS1	WHRGSGSGSGDSGCV
14	31	1004	ZIKV-E/DENV-1-NS1	RGSGSGSGDSGCVIN
15	31	1005	DENV-1-NS1	SGSGSGDSGCVINWK
16	31	1006	DENV-1-NS1	SGSGDSGCVINWKGR
17	31	1007	DENV-1-NS1	SGDSGCVINWKGREL
18	31	1008	DENV-1-NS1	DSGCVINWKGRELKC
19	31	1009	DENV-1-NS1	GCVINWKGRELKCGS
20	31	1010	DENV-1-NS1	VINWKGRELKCGSGI
21	31	1011	DENV-1-NS1	NWKGRELKCGSGIFV
22	31	1012	DENV-1-NS1	KGRELKCGSGIFVTN
23	31	1013	DENV-1-NS1	RELKCGSGIFVTNEV
24	31	1014	DENV-1-NS1	LKCGSGIFVTNEVHT
25	31	1015	DENV-1-NS1	CGSGIFVTNEVHTWT
26	31	1016	DENV-1-NS1	SGIFVTNEVHTWTEQ
27	31	1017	DENV-1-NS1	IFVTNEVHTWTEQYK
28	31	1018	DENV-1-NS1	VTNEVHTWTEQYKFQ
29	31	1019	DENV-1-NS1	NEVHTWTEQYKFQAD
30	31	1020	DENV-1-NS1	VHTWTEQYKFQADSP
31	31	1021	DENV-1-NS1	TWTEQYKFQADSPKR
32	31	1022	DENV-1-NS1	TEQYKFQADSPKRLS
33	31	1023	DENV-1-NS1	QYKFQADSPKRLSAA
34	31	1024	DENV-1-NS1	KFQADSPKRLSAAIG
35	31	1025	DENV-1-NS1	QADSPKRLSAAIGKA
36	31	1026	DENV-1-NS1	DSPKRLSAAIGKAWE
37	31	1027	DENV-1-NS1	PKRLSAAIGKAWEEG
38	31	1028	DENV-1-NS1	RLSAAIGKAWEEGVC
39	31	1029	DENV-1-NS1	SAAIGKAWEEGVCGI
40	31	1030	DENV-1-NS1	AIGKAWEEGVCGIRS
41	31	1031	DENV-1-NS1	GKAWEEGVCGIRSAT
42	31	1032	DENV-1-NS1	AWEEGVCGIRSATRL
43	31	1033	DENV-1-NS1	EEGVCGIRSATRLEN
44	31	1034	DENV-1-NS1	GVCGIRSATRLENIM
45	31	1035	DENV-1-NS1	CGIRSATRLENIMWK
46	31	1036	DENV-1-NS1	IRSATRLENIMWKQI
47	31	1037	DENV-1-NS1	SATRLENIMWKQISN
48	31	1038	DENV-1-NS1	TRLENIMWKQISNEL
49	31	1039	DENV-1-NS1	LENIMWKQISNELNH
50	31	1040	DENV-1-NS1	NIMWKQISNELNHIL
51	31	1041	DENV-1-NS1	MWKQISNELNHILLE
52	31	1042	DENV-1-NS1	KQISNELNHILLEND
53	31	1043	DENV-1-NS1	ISNELNHILLENDMK
54	31	1044	DENV-1-NS1	NELNHILLENDMKFT
55	31	1045	DENV-1-NS1	LNHILLENDMKFTVV
56	31	1046	DENV-1-NS1	HILLENDMKFTVVVG
57	31	1047	DENV-1-NS1	LLENDMKFTVVVGDA
58	31	1048	DENV-1-NS1	ENDMKFTVVVGDANG
59	31	1049	DENV-1-NS1	DMKFTVVVGDANGIL
60	31	1050	DENV-1-NS1	KFTVVVGDANGILAQ
61	31	1051	DENV-1-NS1	TVVVGDANGILAQGK
62	31	1052	DENV-1-NS1	VVGDANGILAQGKKM
63	31	1053	DENV-1-NS1	GDANGILAQGKKMIR
64	31	1054	DENV-1-NS1	ANGILAQGKKMIRPQ
65	31	1055	DENV-1-NS1	GILAQGKKMIRPQPM
66	31	1056	DENV-1-NS1	LAQGKKMIRPQPMEH
1	33	1057	DENV-1-NS1	QGKKMIRPQPMEHKY
2	33	1058	DENV-1-NS1	KKMIRPQPMEHKYSW
3	33	1059	DENV-1-NS1	MIRPQPMEHKYSWKS
4	33	1060	DENV-1-NS1	RPQPMEHKYSWKSWG
5	33	1061	DENV-1-NS1	QPMEHKYSWKSWGKA
6	33	1062	DENV-1-NS1	MEHKYSWKSWGKAKI
7	33	1063	DENV-1-NS1	HKYSWKSWGKAKIIG
8	33	1064	DENV-1-NS1	YSWKSWGKAKIIGAD
9	33	1065	DENV-1-NS1	WKSWGKAKIIGADIQ
10	33	1066	DENV-1-NS1	SWGKAKIIGADIQNT
11	33	1067	DENV-1-NS1	GKAKIIGADIQNTTF
12	33	1068	DENV-1-NS1	AKIIGADIQNTTFII
13	33	1069	DENV-1-NS1	IIGADIQNTTFIIDG
14	33	1070	DENV-1-NS1	GADIQNTTFIIDGPD
15	33	1071	DENV-1-NS1	DIQNTTFIIDGPDTP
16	33	1072	DENV-1-NS1	QNTTFIIDGPDTPEC
17	33	1073	DENV-1-NS1	TTFIIDGPDTPECPD
18	33	1074	DENV-1-NS1	FIIDGPDTPECPDGQ
19	33	1075	DENV-1-NS1	IDGPDTPECPDGQRA
20	33	1076	DENV-1-NS1	GPDTPECPDGQRAWN
21	33	1077	DENV-1-NS1	DTPECPDGQRAWNIW
22	33	1078	DENV-1-NS1	PECPDGQRAWNIWEV
23	33	1079	DENV-1-NS1	CPDGQRAWNIWEVED
24	33	1080	DENV-1-NS1	DGQRAWNIWEVEDYG
25	33	1081	DENV-1-NS1	QRAWNIWEVEDYGFG
26	33	1082	DENV-1-NS1	AWNIWEVEDYGFGVF
27	33	1083	DENV-1-NS1	NIWEVEDYGFGVFTT
28	33	1084	DENV-1-NS1	WEVEDYGFGVFTTNI
29	33	1085	DENV-1-NS1	VEDYGFGVFTTNIWL
30	33	1086	DENV-1-NS1	DYGFGVFTTNIWLKL
31	33	1087	DENV-1-NS1	GFGVFTTNIWLKLRD
32	33	1088	DENV-1-NS1	GVFTTNIWLKLRDSY
33	33	1089	DENV-1-NS1	FTTNIWLKLRDSYTQ
34	33	1090	DENV-1-NS1	TNIWLKLRDSYTQMC
35	33	1091	DENV-1-NS1	IWLKLRDSYTQMCDH
36	33	1092	DENV-1-NS1	LKLRDSYTQMCDHRL
37	33	1093	DENV-1-NS1	LRDSYTQMCDHRLMS
38	33	1094	DENV-1-NS1	DSYTQMCDHRLMSAA
39	33	1095	DENV-1-NS1	YTQMCDHRLMSAAIK
40	33	1096	DENV-1-NS1	QMCDHRLMSAAIKDS
41	33	1097	DENV-1-NS1	CDHRLMSAAIKDSKA
42	33	1098	DENV-1-NS1	HRLMSAAIKDSKAVH
43	33	1099	DENV-1-NS1	LMSAAIKDSKAVHAD
44	33	1100	DENV-1-NS1	SAAIKDSKAVHADMG
45	33	1101	DENV-1-NS1	AIKDSKAVHADMGYW
46	33	1102	DENV-1-NS1	KDSKAVHADMGYWIE
47	33	1103	DENV-1-NS1	SKAVHADMGYWIESE
48	33	1104	DENV-1-NS1	AVHADMGYWIESEKN
49	33	1105	DENV-1-NS1	HADMGYWIESEKNET
50	33	1106	DENV-1-NS1	DMGYWIESEKNETWK
51	33	1107	DENV-1-NS1	GYWIESEKNETWKLA
52	33	1108	DENV-1-NS1	WIESEKNETWKLARA
53	33	1109	DENV-1-NS1	ESEKNETWKLARASF
54	33	1110	DENV-1-NS1	EKNETWKLARASFIE
55	33	1111	DENV-1-NS1	NETWKLARASFIEVK
56	33	1112	DENV-1-NS1	TWKLARASFIEVKTC
57	33	1113	DENV-1-NS1	KLARASFIEVKTCTW
58	33	1114	DENV-1-NS1	ARASFIEVKTCTWPK
59	33	1115	DENV-1-NS1	ASFIEVKTCTWPKSH
60	33	1116	DENV-1-NS1	FIEVKTCTWPKSHTL
61	33	1117	DENV-1-NS1	EVKTCTWPKSHTLWS
62	33	1118	DENV-1-NS1	KTCTWPKSHTLWSNG
63	33	1119	DENV-1-NS1	CTWPKSHTLWSNGVL
64	33	1120	DENV-1-NS1	WPKSHTLWSNGVLES
65	33	1121	DENV-1-NS1	KSHTLWSNGVLESEM
66	33	1122	DENV-1-NS1	HTLWSNGVLESEMII
1	35	1123	DENV-1-NS1	LWSNGVLESEMIIPK
2	35	1124	DENV-1-NS1	SNGVLESEMIIPKIF
3	35	1125	DENV-1-NS1	GVLESEMIIPKIFGG
4	35	1126	DENV-1-NS1	LESEMIIPKIFGGPI
5	35	1127	DENV-1-NS1	SEMIIPKIFGGPISQ
6	35	1128	DENV-1-NS1	MIIPKIFGGPISQHN
7	35	1129	DENV-1-NS1	IPKIFGGPISQHNYR
8	35	1130	DENV-1-NS1	KIFGGPISQHNYRPG
9	35	1131	DENV-1-NS1	FGGPISQHNYRPGYF
10	35	1132	DENV-1-NS1	GPISQHNYRPGYFTQ
11	35	1133	DENV-1-NS1	ISQHNYRPGYFTQTA
12	35	1134	DENV-1-NS1	QHNYRPGYFTQTAGP
13	35	1135	DENV-1-NS1	NYRPGYFTQTAGPWH
14	35	1136	DENV-1-NS1	RPGYFTQTAGPWHLG
15	35	1137	DENV-1-NS1	GYFTQTAGPWHLGKL
16	35	1138	DENV-1-NS1	FTQTAGPWHLGKLEL
17	35	1139	DENV-1-NS1	QTAGPWHLGKLELDF
18	35	1140	DENV-1-NS1	AGPWHLGKLELDFDL
19	35	1141	DENV-1-NS1	PWHLGKLELDFDLCE
20	35	1142	DENV-1-NS1	HLGKLELDFDLCEGT
21	35	1143	DENV-1-NS1	GKLELDFDLCEGTTV
22	35	1144	DENV-1-NS1	LELDFDLCEGTTVVV
23	35	1145	DENV-1-NS1	LDFDLCEGTTVVVDE
24	35	1146	DENV-1-NS1	FDLCEGTTVVVDEHC
25	35	1147	DENV-1-NS1	LCEGTTVVVDEHCGN
26	35	1148	DENV-1-NS1	EGTTVVVDEHCGNRG
27	35	1149	DENV-1-NS1	TTVVVDEHCGNRGPS
28	35	1150	DENV-1-NS1	VVVDEHCGNRGPSLR
29	35	1151	DENV-1-NS1	VDEHCGNRGPSLRTT
30	35	1152	DENV-1-NS1	EHCGNRGPSLRTTTV
31	35	1153	DENV-1-NS1	CGNRGPSLRTTTVTG
32	35	1154	DENV-1-NS1	NRGPSLRTTTVTGKI
33	35	1155	DENV-1-NS1	GPSLRTTTVTGKIIH
34	35	1156	DENV-1-NS1	SLRTTTVTGKIIHEW
35	35	1157	DENV-1-NS1	RTTTVTGKIIHEWCC
36	35	1158	DENV-1-NS1	TTVTGKIIHEWCCRS
37	35	1159	DENV-1-NS1	VTGKIIHEWCCRSCT
38	35	1160	DENV-1-NS1	GKIIHEWCCRSCTLP
39	35	1161	DENV-1-NS1	IIHEWCCRSCTLPPL
40	35	1162	DENV-1-NS1	HEWCCRSCTLPPLRF
41	35	1163	DENV-1-NS1	WCCRSCTLPPLRFRG
42	35	1164	DENV-1-NS1	CRSCTLPPLRFRGED
43	35	1165	DENV-1-NS1	SCTLPPLRFRGEDGC
44	35	1166	DENV-1-NS1	TLPPLRFRGEDGCWY
45	35	1167	DENV-1-NS1	PPLRFRGEDGCWYGM
46	35	1168	DENV-1-NS1	LRFRGEDGCWYGMEI
47	35	1169	DENV-1-NS1	FRGEDGCWYGMEIRP
48	35	1170	DENV-1-NS1	GEDGCWYGMEIRPVK
49	35	1171	DENV-1-NS1	DGCWYGMEIRPVKEK
50	35	1172	DENV-1-NS1	CWYGMEIRPVKEKEE
51	35	1173	DENV-1-NS1	YGMEIRPVKEKEENL
52	35	1174	DENV-1-NS1	MEIRPVKEKEENLVR
53	35	1175	DENV-1-NS1	IRPVKEKEENLVRSM
54	35	1176	DENV-1-NS1	PVKEKEENLVRSMVS
55	35	1177	DENV-1-NS1	KEKEENLVRSMVSAG
56	35	1178	DENV-1-NS1	KEENLVRSMVSAGSG
57	35	1179	DENV-1-NS1	ENLVRSMVSAGSGSG
58	35	1180	DENV-1-NS1	LVRSMVSAGSGSGSG
59	35	1181	DENV-1/2-NS1	RSMVSAGSGSGSGDS
60	35	1182	DENV-1/2-NS1	MVSAGSGSGSGDSGC
61	35	1183	DENV-1/2-NS1	SAGSGSGSGDSGCIV
62	35	1184	DENV-2-NS1	GSGSGSGDSGCIVSW
63	35	1185	DENV-2-NS1	GSGSGDSGCIVSWKN
64	35	1186	DENV-2-NS1	GSGDSGCIVSWKNKE
65	35	1187	DENV-2-NS1	GDSGCIVSWKNKELK
66	35	1188	DENV-2-NS1	SGCIVSWKNKELKCG
1	37	1189	DENV-2-NS1	CIVSWKNKELKCGSG
2	37	1190	DENV-2-NS1	VSWKNKELKCGSGIF
3	37	1191	DENV-2-NS1	WKNKELKCGSGIFIT
4	37	1192	DENV-2-NS1	NKELKCGSGIFITDN
5	37	1193	DENV-2-NS1	ELKCGSGIFITDNVH
6	37	1194	DENV-2-NS1	KCGSGIFITDNVHTW
7	37	1195	DENV-2-NS1	GSGIFITDNVHTWTE
8	37	1196	DENV-2-NS1	GIFITDNVHTWTEQY
9	37	1197	DENV-2-NS1	FITDNVHTWTEQYKF
10	37	1198	DENV-2-NS1	TDNVHTWTEQYKFQP
11	37	1199	DENV-2-NS1	NVHTWTEQYKFQPES
12	37	1200	DENV-2-NS1	HTWTEQYKFQPESPS
13	37	1201	DENV-2-NS1	WTEQYKFQPESPSKL
14	37	1202	DENV-2-NS1	EQYKFQPESPSKLAS
15	37	1203	DENV-2-NS1	YKFQPESPSKLASAI
16	37	1204	DENV-2-NS1	FQPESPSKLASAIQK
17	37	1205	DENV-2-NS1	PESPSKLASAIQKAH
18	37	1206	DENV-2-NS1	SPSKLASAIQKAHEE
19	37	1207	DENV-2-NS1	SKLASAIQKAHEEGI
20	37	1208	DENV-2-NS1	LASAIQKAHEEGICG
21	37	1209	DENV-2-NS1	SAIQKAHEEGICGIR
22	37	1210	DENV-2-NS1	IQKAHEEGICGIRSV
23	37	1211	DENV-2-NS1	KAHEEGICGIRSVTR
24	37	1212	DENV-2-NS1	HEEGICGIRSVTRLE
25	37	1213	DENV-2-NS1	EGICGIRSVTRLENL
26	37	1214	DENV-2-NS1	ICGIRSVTRLENLMW
27	37	1215	DENV-2-NS1	GIRSVTRLENLMWKQ
28	37	1216	DENV-2-NS1	RSVTRLENLMWKQIT
29	37	1217	DENV-2-NS1	VTRLENLMWKQITPE
30	37	1218	DENV-2-NS1	RLENLMWKQITPELN
31	37	1219	DENV-2-NS1	ENLMWKQITPELNHI
32	37	1220	DENV-2-NS1	LMWKQITPELNHILS
33	37	1221	DENV-2-NS1	WKQITPELNHILSEN
34	37	1222	DENV-2-NS1	QITPELNHILSENEV
35	37	1223	DENV-2-NS1	TPELNHILSENEVKL
36	37	1224	DENV-2-NS1	ELNHILSENEVKLTI
37	37	1225	DENV-2-NS1	NHILSENEVKLTIMT
38	37	1226	DENV-2-NS1	ILSENEVKLTIMTGD
39	37	1227	DENV-2-NS1	SENEVKLTIMTGDIK
40	37	1228	DENV-2-NS1	NEVKLTIMTGDIKGI
41	37	1229	DENV-2-NS1	VKLTIMTGDIKGIMQ
42	37	1230	DENV-2-NS1	LTIMTGDIKGIMQAG
43	37	1231	DENV-2-NS1	IMTGDIKGIMQAGKR
44	37	1232	DENV-2-NS1	TGDIKGIMQAGKRSL
45	37	1233	DENV-2-NS1	DIKGIMQAGKRSLRP
46	37	1234	DENV-2-NS1	KGIMQAGKRSLRPQP
47	37	1235	DENV-2-NS1	IMQAGKRSLRPQPTE
48	37	1236	DENV-2-NS1	QAGKRSLRPQPTELK
49	37	1237	DENV-2-NS1	GKRSLRPQPTELKYS
50	37	1238	DENV-2-NS1	RSLRPQPTELKYSWK
51	37	1239	DENV-2-NS1	LRPQPTELKYSWKTW
52	37	1240	DENV-2-NS1	PQPTELKYSWKTWGK
53	37	1241	DENV-2-NS1	PTELKYSWKTWGKAK
54	37	1242	DENV-2-NS1	ELKYSWKTWGKAKML
55	37	1243	DENV-2-NS1	KYSWKTWGKAKMLST
56	37	1244	DENV-2-NS1	SWKTWGKAKMLSTES
57	37	1245	DENV-2-NS1	KTWGKAKMLSTESHN
58	37	1246	DENV-2-NS1	WGKAKMLSTESHNQT
59	37	1247	DENV-2-NS1	KAKMLSTESHNQTFL
60	37	1248	DENV-2-NS1	KMLSTESHNQTFLID
61	37	1249	DENV-2-NS1	LSTESHNQTFLIDGP
62	37	1250	DENV-2-NS1	TESHNQTFLIDGPET
63	37	1251	DENV-2-NS1	SHNQTFLIDGPETAE
64	37	1252	DENV-2-NS1	NQTFLIDGPETAECP
65	37	1253	DENV-2-NS1	TFLIDGPETAECPNT
66	37	1254	DENV-2-NS1	LIDGPETAECPNTNR
1	39	1255	DENV-2-NS1	DGPETAECPNTNRAW
2	39	1256	DENV-2-NS1	PETAECPNTNRAWNS
3	39	1257	DENV-2-NS1	TAECPNTNRAWNSLE
4	39	1258	DENV-2-NS1	ECPNTNRAWNSLEVE
5	39	1259	DENV-2-NS1	PNTNRAWNSLEVEDY
6	39	1260	DENV-2-NS1	TNRAWNSLEVEDYGF
7	39	1261	DENV-2-NS1	RAWNSLEVEDYGFGV
8	39	1262	DENV-2-NS1	WNSLEVEDYGFGVFT
9	39	1263	DENV-2-NS1	SLEVEDYGFGVFTTN
10	39	1264	DENV-2-NS1	EVEDYGFGVFTTNIW
11	39	1265	DENV-2-NS1	EDYGFGVFTTNIWLK
12	39	1266	DENV-2-NS1	YGFGVFTTNIWLKLR
13	39	1267	DENV-2-NS1	FGVFTTNIWLKLREK
14	39	1268	DENV-2-NS1	VFTTNIWLKLREKQD
15	39	1269	DENV-2-NS1	TTNIWLKLREKQDVF
16	39	1270	DENV-2-NS1	NIWLKLREKQDVFCD
17	39	1271	DENV-2-NS1	WLKLREKQDVFCDSK
18	39	1272	DENV-2-NS1	KLREKQDVFCDSKLM
19	39	1273	DENV-2-NS1	REKQDVFCDSKLMSA
20	39	1274	DENV-2-NS1	KQDVFCDSKLMSAAI
21	39	1275	DENV-2-NS1	DVFCDSKLMSAAIKD
22	39	1276	DENV-2-NS1	FCDSKLMSAAIKDNR
23	39	1277	DENV-2-NS1	DSKLMSAAIKDNRAV
24	39	1278	DENV-2-NS1	KLMSAAIKDNRAVHA
25	39	1279	DENV-2-NS1	MSAAIKDNRAVHADM
26	39	1280	DENV-2-NS1	AAIKDNRAVHADMGY
27	39	1281	DENV-2-NS1	IKDNRAVHADMGYWI
28	39	1282	DENV-2-NS1	DNRAVHADMGYWIES
29	39	1283	DENV-2-NS1	RAVHADMGYWIESAL
30	39	1284	DENV-2-NS1	VHADMGYWIESALND
31	39	1285	DENV-2-NS1	ADMGYWIESALNDTW
32	39	1286	DENV-2-NS1	MGYWIESALNDTWKM
33	39	1287	DENV-2-NS1	YWIESALNDTWKMEK
34	39	1288	DENV-2-NS1	IESALNDTWKMEKAS
35	39	1289	DENV-2-NS1	SALNDTWKMEKASFI
36	39	1290	DENV-2-NS1	LNDTWKMEKASFIEV
37	39	1291	DENV-2-NS1	DTWKMEKASFIEVKS
38	39	1292	DENV-2-NS1	WKMEKASFIEVKSCH
39	39	1293	DENV-2-NS1	MEKASFIEVKSCHWP
40	39	1294	DENV-2-NS1	KASFIEVKSCHWPKS
41	39	1295	DENV-2-NS1	SFIEVKSCHWPKSHT
42	39	1296	DENV-2-NS1	IEVKSCHWPKSHTLW
43	39	1297	DENV-2-NS1	VKSCHWPKSHTLWSN
44	39	1298	DENV-2-NS1	SCHWPKSHTLWSNGV
45	39	1299	DENV-2-NS1	HWPKSHTLWSNGVLE
46	39	1300	DENV-2-NS1	PKSHTLWSNGVLESE
47	39	1301	DENV-2-NS1	SHTLWSNGVLESEMV
48	39	1302	DENV-2-NS1	TLWSNGVLESEMVIP
49	39	1303	DENV-2-NS1	WSNGVLESEMVIPKN
50	39	1304	DENV-2-NS1	NGVLESEMVIPKNFA
51	39	1305	DENV-2-NS1	VLESEMVIPKNFAGP
52	39	1306	DENV-2-NS1	ESEMVIPKNFAGPVS
53	39	1307	DENV-2-NS1	EMVIPKNFAGPVSQH
54	39	1308	DENV-2-NS1	VIPKNFAGPVSQHNY
55	39	1309	DENV-2-NS1	PKNFAGPVSQHNYRP
56	39	1310	DENV-2-NS1	NFAGPVSQHNYRPGY
57	39	1311	DENV-2-NS1	AGPVSQHNYRPGYHT
58	39	1312	DENV-2-NS1	PVSQHNYRPGYHTQT
59	39	1313	DENV-2-NS1	SQHNYRPGYHTQTAG
60	39	1314	DENV-2-NS1	HNYRPGYHTQTAGPW
61	39	1315	DENV-2-NS1	YRPGYHTQTAGPWHL
62	39	1316	DENV-2-NS1	PGYHTQTAGPWHLGK
63	39	1317	DENV-2-NS1	YHTQTAGPWHLGKLE
64	39	1318	DENV-2-NS1	TQTAGPWHLGKLEMD
65	39	1319	DENV-2-NS1	TAGPWHLGKLEMDFD
66	39	1320	DENV-2-NS1	GPWHLGKLEMDFDFC
1	41	1321	DENV-2-NS1	WHLGKLEMDFDFCEG
2	41	1322	DENV-2-NS1	LGKLEMDFDFCEGTT
3	41	1323	DENV-2-NS1	KLEMDFDFCEGTTVV
4	41	1324	DENV-2-NS1	EMDFDFCEGTTVVVT
5	41	1325	DENV-2-NS1	DFDFCEGTTVVVTED
6	41	1326	DENV-2-NS1	DFCEGTTVVVTEDCE
7	41	1327	DENV-2-NS1	CEGTTVVVTEDCEKR
8	41	1328	DENV-2-NS1	GTTVVVTEDCEKRGP
9	41	1329	DENV-2-NS1	TVVVTEDCEKRGPSL
10	41	1330	DENV-2-NS1	VVTEDCEKRGPSLRT
11	41	1331	DENV-2-NS1	TEDCEKRGPSLRTTT
12	41	1332	DENV-2-NS1	DCEKRGPSLRTTTAS
13	41	1333	DENV-2-NS1	EKRGPSLRTTTASGK
14	41	1334	DENV-2-NS1	RGPSLRTTTASGKLI
15	41	1335	DENV-2-NS1	PSLRTTTASGKLITE
16	41	1336	DENV-2-NS1	LRTTTASGKLITEWC
17	41	1337	DENV-2-NS1	TTTASGKLITEWCCR
18	41	1338	DENV-2-NS1	TASGKLITEWCCRSC
19	41	1339	DENV-2-NS1	SGKLITEWCCRSCTL
20	41	1340	DENV-2-NS1	KLITEWCCRSCTLPP
21	41	1341	DENV-2-NS1	ITEWCCRSCTLPPLR
22	41	1342	DENV-2-NS1	EWCCRSCTLPPLRYR
23	41	1343	DENV-2-NS1	CCRSCTLPPLRYRGE
24	41	1344	DENV-2-NS1	RSCTLPPLRYRGEDG
25	41	1345	DENV-2-NS1	CTLPPLRYRGEDGCW
26	41	1346	DENV-2-NS1	LPPLRYRGEDGCWYG
27	41	1347	DENV-2-NS1	PLRYRGEDGCWYGME
28	41	1348	DENV-2-NS1	RYRGEDGCWYGMEIR
29	41	1349	DENV-2-NS1	RGEDGCWYGMEIRPL
30	41	1350	DENV-2-NS1	EDGCWYGMEIRPLKE
31	41	1351	DENV-2-NS1	GCWYGMEIRPLKEKE
32	41	1352	DENV-2-NS1	WYGMEIRPLKEKEEN
33	41	1353	DENV-2-NS1	GMEIRPLKEKEENLV
34	41	1354	DENV-2-NS1	EIRPLKEKEENLVNS
35	41	1355	DENV-2-NS1	RPLKEKEENLVNSLV
36	41	1356	DENV-2-NS1	LKEKEENLVNSLVTA
37	41	1357	DENV-2-NS1	EKEENLVNSLVTAGS
38	41	1358	DENV-2-NS1	EENLVNSLVTAGSGS
39	41	1359	DENV-2-NS1	NLVNSLVTAGSGSGS
40	41	1360	DENV-2/3-NS1	VNSLVTAGSGSGSGD
41	41	1361	DENV-2/3-NS1	SLVTAGSGSGSGDMG
42	41	1362	DENV-2/3-NS1	VTAGSGSGSGDMGCV
43	41	1363	DENV-2/3-NS1	AGSGSGSGDMGCVIN
44	41	1364	DENV-3-NS1	SGSGSGDMGCVINWK
45	41	1365	DENV-3-NS1	SGSGDMGCVINWKGK
46	41	1366	DENV-3-NS1	SGDMGCVINWKGKEL
47	41	1367	DENV-3-NS1	DMGCVINWKGKELKC
48	41	1368	DENV-3-NS1	GCVINWKGKELKCGS
49	41	1369	DENV-3-NS1	VINWKGKELKCGSGI
50	41	1370	DENV-3-NS1	NWKGKELKCGSGIFV
51	41	1371	DENV-3-NS1	KGKELKCGSGIFVTN
52	41	1372	DENV-3-NS1	KELKCGSGIFVTNEV
53	41	1373	DENV-3-NS1	LKCGSGIFVTNEVHT
54	41	1374	DENV-3-NS1	CGSGIFVTNEVHTWT
55	41	1375	DENV-3-NS1	SGIFVTNEVHTWTEQ
56	41	1376	DENV-3-NS1	IFVTNEVHTWTEQYK
57	41	1377	DENV-3-NS1	VTNEVHTWTEQYKFQ
58	41	1378	DENV-3-NS1	NEVHTWTEQYKFQAD
59	41	1379	DENV-3-NS1	VHTWTEQYKFQADSP
60	41	1380	DENV-3-NS1	TWTEQYKFQADSPKR
61	41	1381	DENV-3-NS1	TEQYKFQADSPKRLA
62	41	1382	DENV-3-NS1	QYKFQADSPKRLATA
63	41	1383	DENV-3-NS1	KFQADSPKRLATAIA
64	41	1384	DENV-3-NS1	QADSPKRLATAIAGA
65	41	1385	DENV-3-NS1	DSPKRLATAIAGAWE
66	41	1386	DENV-3-NS1	PKRLATAIAGAWENG
1	43	1387	DENV-3-NS1	RLATAIAGAWENGVC
2	43	1388	DENV-3-NS1	ATAIAGAWENGVCGI
3	43	1389	DENV-3-NS1	AIAGAWENGVCGIRS
4	43	1390	DENV-3-NS1	AGAWENGVCGIRSTT
5	43	1391	DENV-3-NS1	AWENGVCGIRSTTRM
6	43	1392	DENV-3-NS1	ENGVCGIRSTTRMEN
7	43	1393	DENV-3-NS1	GVCGIRSTTRMENLL
8	43	1394	DENV-3-NS1	CGIRSTTRMENLLWK
9	43	1395	DENV-3-NS1	IRSTTRMENLLWKQI
10	43	1396	DENV-3-NS1	STTRMENLLWKQIAN
11	43	1397	DENV-3-NS1	TRMENLLWKQIANEL
12	43	1398	DENV-3-NS1	MENLLWKQIANELNY
13	43	1399	DENV-3-NS1	NLLWKQIANELNYIL
14	43	1400	DENV-3-NS1	LWKQIANELNYILWE
15	43	1401	DENV-3-NS1	KQIANELNYILWENN
16	43	1402	DENV-3-NS1	IANELNYILWENNIK
17	43	1403	DENV-3-NS1	NELNYILWENNIKLT
18	43	1404	DENV-3-NS1	LNYILWENNIKLTVV
19	43	1405	DENV-3-NS1	YILWENNIKLTVVVG
20	43	1406	DENV-3-NS1	LWENNIKLTVVVGDI
21	43	1407	DENV-3-NS1	ENNIKLTVVVGDIIG
22	43	1408	DENV-3-NS1	NIKLTVVVGDIIGVL
23	43	1409	DENV-3-NS1	KLTVVVGDIIGVLEQ
24	43	1410	DENV-3-NS1	TVVVGDIIGVLEQGK
25	43	1411	DENV-3-NS1	VVGDIIGVLEQGKRT
26	43	1412	DENV-3-NS1	GDIIGVLEQGKRTLT
27	43	1413	DENV-3-NS1	IIGVLEQGKRTLTPQ
28	43	1414	DENV-3-NS1	GVLEQGKRTLTPQPM
29	43	1415	DENV-3-NS1	LEQGKRTLTPQPMEL
30	43	1416	DENV-3-NS1	QGKRTLTPQPMELKY
31	43	1417	DENV-3-NS1	KRTLTPQPMELKYSW
32	43	1418	DENV-3-NS1	TLTPQPMELKYSWKT
33	43	1419	DENV-3-NS1	TPQPMELKYSWKTWG
34	43	1420	DENV-3-NS1	QPMELKYSWKTWGKA
35	43	1421	DENV-3-NS1	MELKYSWKTWGKAKI
36	43	1422	DENV-3-NS1	LKYSWKTWGKAKIVT
37	43	1423	DENV-3-NS1	YSWKTWGKAKIVTAE
38	43	1424	DENV-3-NS1	WKTWGKAKIVTAETQ
39	43	1425	DENV-3-NS1	TWGKAKIVTAETQNS
40	43	1426	DENV-3-NS1	GKAKIVTAETQNSSF
41	43	1427	DENV-3-NS1	AKIVTAETQNSSFII
42	43	1428	DENV-3-NS1	IVTAETQNSSFIIDG
43	43	1429	DENV-3-NS1	TAETQNSSFIIDGPN
44	43	1430	DENV-3-NS1	ETQNSSFIIDGPNTP
45	43	1431	DENV-3-NS1	QNSSFIIDGPNTPEC
46	43	1432	DENV-3-NS1	SSFIIDGPNTPECPS
47	43	1433	DENV-3-NS1	FIIDGPNTPECPSAS
48	43	1434	DENV-3-NS1	IDGPNTPECPSASRA
49	43	1435	DENV-3-NS1	GPNTPECPSASRAWN
50	43	1436	DENV-3-NS1	NTPECPSASRAWNVW
51	43	1437	DENV-3-NS1	PECPSASRAWNVWEV
52	43	1438	DENV-3-NS1	CPSASRAWNVWEVED
53	43	1439	DENV-3-NS1	SASRAWNVWEVEDYG
54	43	1440	DENV-3-NS1	SRAWNVWEVEDYGFG
55	43	1441	DENV-3-NS1	AWNVWEVEDYGFGVF
56	43	1442	DENV-3-NS1	NVWEVEDYGFGVFTT
57	43	1443	DENV-3-NS1	WEVEDYGFGVFTTNI
58	43	1444	DENV-3-NS1	VEDYGFGVFTTNIWL
59	43	1445	DENV-3-NS1	DYGFGVFTTNIWLKL
60	43	1446	DENV-3-NS1	GFGVFTTNIWLKLRE
61	43	1447	DENV-3-NS1	GVFTTNIWLKLREVY
62	43	1448	DENV-3-NS1	FTTNIWLKLREVYTQ
63	43	1449	DENV-3-NS1	TNIWLKLREVYTQLC
64	43	1450	DENV-3-NS1	IWLKLREVYTQLCDH
65	43	1451	DENV-3-NS1	LKLREVYTQLCDHRL
66	43	1452	DENV-3-NS1	LREVYTQLCDHRLMS
1	45	1453	DENV-3-NS1	EVYTQLCDHRLMSAA
2	45	1454	DENV-3-NS1	YTQLCDHRLMSAAVK
3	45	1455	DENV-3-NS1	QLCDHRLMSAAVKDE
4	45	1456	DENV-3-NS1	CDHRLMSAAVKDERA
5	45	1457	DENV-3-NS1	HRLMSAAVKDERAVH
6	45	1458	DENV-3-NS1	LMSAAVKDERAVHAD
7	45	1459	DENV-3-NS1	SAAVKDERAVHADMG
8	45	1460	DENV-3-NS1	AVKDERAVHADMGYW
9	45	1461	DENV-3-NS1	KDERAVHADMGYWIE
10	45	1462	DENV-3-NS1	ERAVHADMGYWIESQ
11	45	1463	DENV-3-NS1	AVHADMGYWIESQKN
12	45	1464	DENV-3-NS1	HADMGYWIESQKNGS
13	45	1465	DENV-3-NS1	DMGYWIESQKNGSWK
14	45	1466	DENV-3-NS1	GYWIESQKNGSWKLE
15	45	1467	DENV-3-NS1	WIESQKNGSWKLEKA
16	45	1468	DENV-3-NS1	ESQKNGSWKLEKASL
17	45	1469	DENV-3-NS1	QKNGSWKLEKASLIE
18	45	1470	DENV-3-NS1	NGSWKLEKASLIEVK
19	45	1471	DENV-3-NS1	SWKLEKASLIEVKTC
20	45	1472	DENV-3-NS1	KLEKASLIEVKTCTW
21	45	1473	DENV-3-NS1	EKASLIEVKTCTWPK
22	45	1474	DENV-3-NS1	ASLIEVKTCTWPKSH
23	45	1475	DENV-3-NS1	LIEVKTCTWPKSHTL
24	45	1476	DENV-3-NS1	EVKTCTWPKSHTLWS
25	45	1477	DENV-3-NS1	KTCTWPKSHTLWSNG
26	45	1478	DENV-3-NS1	CTWPKSHTLWSNGVL
27	45	1479	DENV-3-NS1	WPKSHTLWSNGVLES
28	45	1480	DENV-3-NS1	KSHTLWSNGVLESDM
29	45	1481	DENV-3-NS1	HTLWSNGVLESDMII
30	45	1482	DENV-3-NS1	LWSNGVLESDMIIPK
31	45	1483	DENV-3-NS1	SNGVLESDMIIPKSL
32	45	1484	DENV-3-NS1	GVLESDMIIPKSLAG
33	45	1485	DENV-3-NS1	LESDMIIPKSLAGPI
34	45	1486	DENV-3-NS1	SDMIIPKSLAGPISQ
35	45	1487	DENV-3-NS1	MIIPKSLAGPISQHN
36	45	1488	DENV-3-NS1	IPKSLAGPISQHNHR
37	45	1489	DENV-3-NS1	KSLAGPISQHNHRPG
38	45	1490	DENV-3-NS1	LAGPISQHNHRPGYH
39	45	1491	DENV-3-NS1	GPISQHNHRPGYHTQ
40	45	1492	DENV-3-NS1	ISQHNHRPGYHTQTA
41	45	1493	DENV-3-NS1	QHNHRPGYHTQTAGP
42	45	1494	DENV-3-NS1	NHRPGYHTQTAGPWH
43	45	1495	DENV-3-NS1	RPGYHTQTAGPWHLG
44	45	1496	DENV-3-NS1	GYHTQTAGPWHLGKL
45	45	1497	DENV-3-NS1	HTQTAGPWHLGKLEL
46	45	1498	DENV-3-NS1	QTAGPWHLGKLELDF
47	45	1499	DENV-3-NS1	AGPWHLGKLELDFNY
48	45	1500	DENV-3-NS1	PWHLGKLELDFNYCE
49	45	1501	DENV-3-NS1	HLGKLELDFNYCEGT
50	45	1502	DENV-3-NS1	GKLELDFNYCEGTTV
51	45	1503	DENV-3-NS1	LELDFNYCEGTTVVI
52	45	1504	DENV-3-NS1	LDFNYCEGTTVVITE
53	45	1505	DENV-3-NS1	FNYCEGTTVVITENC
54	45	1506	DENV-3-NS1	YCEGTTVVITENCGT
55	45	1507	DENV-3-NS1	EGTTVVITENCGTRG
56	45	1508	DENV-3-NS1	TTVVITENCGTRGPS
57	45	1509	DENV-3-NS1	VVITENCGTRGPSLR
58	45	1510	DENV-3-NS1	ITENCGTRGPSLRTT
59	45	1511	DENV-3-NS1	ENCGTRGPSLRTTTV
60	45	1512	DENV-3-NS1	CGTRGPSLRTTTVSG
61	45	1513	DENV-3-NS1	TRGPSLRTTTVSGKL
62	45	1514	DENV-3-NS1	GPSLRTTTVSGKLIH
63	45	1515	DENV-3-NS1	SLRTTTVSGKLIHEW
64	45	1516	DENV-3-NS1	RTTTVSGKLIHEWCC
65	45	1517	DENV-3-NS1	TTVSGKLIHEWCCRS
66	45	1518	DENV-3-NS1	VSGKLIHEWCCRSCT
1	47	1519	DENV-3-NS1	GKLIHEWCCRSCTLP
2	47	1520	DENV-3-NS1	LIHEWCCRSCTLPPL
3	47	1521	DENV-3-NS1	HEWCCRSCTLPPLRY
4	47	1522	DENV-3-NS1	WCCRSCTLPPLRYMG
5	47	1523	DENV-3-NS1	CRSCTLPPLRYMGED
6	47	1524	DENV-3-NS1	SCTLPPLRYMGEDGC
7	47	1525	DENV-3-NS1	TLPPLRYMGEDGCWY
8	47	1526	DENV-3-NS1	PPLRYMGEDGCWYGM
9	47	1527	DENV-3-NS1	LRYMGEDGCWYGMEI
10	47	1528	DENV-3-NS1	YMGEDGCWYGMEIRP
11	47	1529	DENV-3-NS1	GEDGCWYGMEIRPIS
12	47	1530	DENV-3-NS1	DGCWYGMEIRPISEK
13	47	1531	DENV-3-NS1	CWYGMEIRPISEKEE
14	47	1532	DENV-3-NS1	YGMEIRPISEKEENM
15	47	1533	DENV-3-NS1	MEIRPISEKEENMVK
16	47	1534	DENV-3-NS1	IRPISEKEENMVKSL
17	47	1535	DENV-3-NS1	PISEKEENMVKSLVS
18	47	1536	DENV-3-NS1	SEKEENMVKSLVSAG
19	47	1537	DENV-3-NS1	KEENMVKSLVSAGSG
20	47	1538	DENV-3-NS1	ENMVKSLVSAGSGSG
21	47	1539	DENV-3-NS1	MVKSLVSAGSGSGSG
22	47	1540	DENV-3/4-NS1	KSLVSAGSGSGSGDM
23	47	1541	DENV-3/4-NS1	LVSAGSGSGSGDMGC
24	47	1542	DENV-3/4-NS1	SAGSGSGSGDMGCVV
25	47	1543	DENV-4-NS1	GSGSGSGDMGCVVSW
26	47	1544	DENV-4-NS1	GSGSGDMGCVVSWSG
27	47	1545	DENV-4-NS1	GSGDMGCVVSWSGRE
28	47	1546	DENV-4-NS1	GDMGCVVSWSGRELK
29	47	1547	DENV-4-NS1	MGCVVSWSGRELKCG
30	47	1548	DENV-4-NS1	CVVSWSGRELKCGSG
31	47	1549	DENV-4-NS1	VSWSGRELKCGSGIF
32	47	1550	DENV-4-NS1	WSGRELKCGSGIFVV
33	47	1551	DENV-4-NS1	GRELKCGSGIFVVDN
34	47	1552	DENV-4-NS1	ELKCGSGIFVVDNVH
35	47	1553	DENV-4-NS1	KCGSGIFVVDNVHTW
36	47	1554	DENV-4-NS1	GSGIFVVDNVHTWTE
37	47	1555	DENV-4-NS1	GIFVVDNVHTWTEQY
38	47	1556	DENV-4-NS1	FVVDNVHTWTEQYKF
39	47	1557	DENV-4-NS1	VDNVHTWTEQYKFQP
40	47	1558	DENV-4-NS1	NVHTWTEQYKFQPES
41	47	1559	DENV-4-NS1	HTWTEQYKFQPESPA
42	47	1560	DENV-4-NS1	WTEQYKFQPESPARL
43	47	1561	DENV-4-NS1	EQYKFQPESPARLAS
44	47	1562	DENV-4-NS1	YKFQPESPARLASAI
45	47	1563	DENV-4-NS1	FQPESPARLASAILN
46	47	1564	DENV-4-NS1	PESPARLASAILNAH
47	47	1565	DENV-4-NS1	SPARLASAILNAHKD
48	47	1566	DENV-4-NS1	ARLASAILNAHKDGV
49	47	1567	DENV-4-NS1	LASAILNAHKDGVCG
50	47	1568	DENV-4-NS1	SAILNAHKDGVCGIR
51	47	1569	DENV-4-NS1	ILNAHKDGVCGIRST
52	47	1570	DENV-4-NS1	NAHKDGVCGIRSTTR
53	47	1571	DENV-4-NS1	HKDGVCGIRSTTRLE
54	47	1572	DENV-4-NS1	DGVCGIRSTTRLENV
55	47	1573	DENV-4-NS1	VCGIRSTTRLENVMW
56	47	1574	DENV-4-NS1	GIRSTTRLENVMWKQ
57	47	1575	DENV-4-NS1	RSTTRLENVMWKQIT
58	47	1576	DENV-4-NS1	TTRLENVMWKQITNE
59	47	1577	DENV-4-NS1	RLENVMWKQITNELN
60	47	1578	DENV-4-NS1	ENVMWKQITNELNYV
61	47	1579	DENV-4-NS1	VMWKQITNELNYVLW
62	47	1580	DENV-4-NS1	WKQITNELNYVLWEG
63	47	1581	DENV-4-NS1	QITNELNYVLWEGGH
64	47	1582	DENV-4-NS1	TNELNYVLWEGGHDL
65	47	1583	DENV-4-NS1	ELNYVLWEGGHDLTV
66	47	1584	DENV-4-NS1	NYVLWEGGHDLTVVA
1	49	1585	DENV-4-NS1	VLWEGGHDLTVVAGD
2	49	1586	DENV-4-NS1	WEGGHDLTVVAGDVK
3	49	1587	DENV-4-NS1	GGHDLTVVAGDVKGV
4	49	1588	DENV-4-NS1	HDLTVVAGDVKGVLT
5	49	1589	DENV-4-NS1	LTVVAGDVKGVLTKG
6	49	1590	DENV-4-NS1	VVAGDVKGVLTKGKR
7	49	1591	DENV-4-NS1	AGDVKGVLTKGKRAL
8	49	1592	DENV-4-NS1	DVKGVLTKGKRALTP
9	49	1593	DENV-4-NS1	KGVLTKGKRALTPPA
10	49	1594	DENV-4-NS1	VLTKGKRALTPPASD
11	49	1595	DENV-4-NS1	TKGKRALTPPASDLK
12	49	1596	DENV-4-NS1	GKRALTPPASDLKYS
13	49	1597	DENV-4-NS1	RALTPPASDLKYSWK
14	49	1598	DENV-4-NS1	LTPPASDLKYSWKTW
15	49	1599	DENV-4-NS1	PPASDLKYSWKTWGK
16	49	1600	DENV-4-NS1	ASDLKYSWKTWGKAK
17	49	1601	DENV-4-NS1	DLKYSWKTWGKAKIF
18	49	1602	DENV-4-NS1	KYSWKTWGKAKIFTP
19	49	1603	DENV-4-NS1	SWKTWGKAKIFTPEA
20	49	1604	DENV-4-NS1	KTWGKAKIFTPEARN
21	49	1605	DENV-4-NS1	WGKAKIFTPEARNST
22	49	1606	DENV-4-NS1	KAKIFTPEARNSTFL
23	49	1607	DENV-4-NS1	KIFTPEARNSTFLID
24	49	1608	DENV-4-NS1	FTPEARNSTFLIDGP
25	49	1609	DENV-4-NS1	PEARNSTFLIDGPDT
26	49	1610	DENV-4-NS1	ARNSTFLIDGPDTSE
27	49	1611	DENV-4-NS1	NSTFLIDGPDTSECP
28	49	1612	DENV-4-NS1	TFLIDGPDTSECPNE
29	49	1613	DENV-4-NS1	LIDGPDTSECPNERR
30	49	1614	DENV-4-NS1	DGPDTSECPNERRAW
31	49	1615	DENV-4-NS1	PDTSECPNERRAWNS
32	49	1616	DENV-4-NS1	TSECPNERRAWNSFE
33	49	1617	DENV-4-NS1	ECPNERRAWNSFEVE
34	49	1618	DENV-4-NS1	PNERRAWNSFEVEDY
35	49	1619	DENV-4-NS1	ERRAWNSFEVEDYGF
36	49	1620	DENV-4-NS1	RAWNSFEVEDYGFGM
37	49	1621	DENV-4-NS1	WNSFEVEDYGFGMFT
38	49	1622	DENV-4-NS1	SFEVEDYGFGMFTTN
39	49	1623	DENV-4-NS1	EVEDYGFGMFTTNIW
40	49	1624	DENV-4-NS1	EDYGFGMFTTNIWMK
41	49	1625	DENV-4-NS1	YGFGMFTTNIWMKFR
42	49	1626	DENV-4-NS1	FGMFTTNIWMKFREG
43	49	1627	DENV-4-NS1	MFTTNIWMKFREGSS
44	49	1628	DENV-4-NS1	TTNIWMKFREGSSEV
45	49	1629	DENV-4-NS1	NIWMKFREGSSEVCD
46	49	1630	DENV-4-NS1	WMKFREGSSEVCDHR
47	49	1631	DENV-4-NS1	KFREGSSEVCDHRLM
48	49	1632	DENV-4-NS1	REGSSEVCDHRLMSA
49	49	1633	DENV-4-NS1	GSSEVCDHRLMSAAI
50	49	1634	DENV-4-NS1	SEVCDHRLMSAAIKD
51	49	1635	DENV-4-NS1	VCDHRLMSAAIKDQK
52	49	1636	DENV-4-NS1	DHRLMSAAIKDQKAV
53	49	1637	DENV-4-NS1	RLMSAAIKDQKAVHA
54	49	1638	DENV-4-NS1	MSAAIKDQKAVHADM
55	49	1639	DENV-4-NS1	AAIKDQKAVHADMGY
56	49	1640	DENV-4-NS1	IKDQKAVHADMGYWI
57	49	1641	DENV-4-NS1	DQKAVHADMGYWIES
58	49	1642	DENV-4-NS1	KAVHADMGYWIESSK
59	49	1643	DENV-4-NS1	VHADMGYWIESSKNQ
60	49	1644	DENV-4-NS1	ADMGYWIESSKNQTW
61	49	1645	DENV-4-NS1	MGYWIESSKNQTWQI
62	49	1646	DENV-4-NS1	YWIESSKNQTWQIER
63	49	1647	DENV-4-NS1	IESSKNQTWQIERAS
64	49	1648	DENV-4-NS1	SSKNQTWQIERASLI
65	49	1649	DENV-4-NS1	KNQTWQIERASLIEV
66	49	1650	DENV-4-NS1	QTWQIERASLIEVKT
1	51	1651	DENV-4-NS1	WQIERASLIEVKTCL
2	51	1652	DENV-4-NS1	IERASLIEVKTCLWP
3	51	1653	DENV-4-NS1	RASLIEVKTCLWPKT
4	51	1654	DENV-4-NS1	SLIEVKTCLWPKTHT
5	51	1655	DENV-4-NS1	IEVKTCLWPKTHTLW
6	51	1656	DENV-4-NS1	VKTCLWPKTHTLWSN
7	51	1657	DENV-4-NS1	TCLWPKTHTLWSNGV
8	51	1658	DENV-4-NS1	LWPKTHTLWSNGVLE
9	51	1659	DENV-4-NS1	PKTHTLWSNGVLESQ
10	51	1660	DENV-4-NS1	THTLWSNGVLESQML
11	51	1661	DENV-4-NS1	TLWSNGVLESQMLIP
12	51	1662	DENV-4-NS1	WSNGVLESQMLIPKS
13	51	1663	DENV-4-NS1	NGVLESQMLIPKSYA
14	51	1664	DENV-4-NS1	VLESQMLIPKSYAGP
15	51	1665	DENV-4-NS1	ESQMLIPKSYAGPFS
16	51	1666	DENV-4-NS1	QMLIPKSYAGPFSQH
17	51	1667	DENV-4-NS1	LIPKSYAGPFSQHNY
18	51	1668	DENV-4-NS1	PKSYAGPFSQHNYRQ
19	51	1669	DENV-4-NS1	SYAGPFSQHNYRQGY
20	51	1670	DENV-4-NS1	AGPFSQHNYRQGYAT
21	51	1671	DENV-4-NS1	PFSQHNYRQGYATQT
22	51	1672	DENV-4-NS1	SQHNYRQGYATQTVG
23	51	1673	DENV-4-NS1	HNYRQGYATQTVGPW
24	51	1674	DENV-4-NS1	YRQGYATQTVGPWHL
25	51	1675	DENV-4-NS1	QGYATQTVGPWHLGK
26	51	1676	DENV-4-NS1	YATQTVGPWHLGKLE
27	51	1677	DENV-4-NS1	TQTVGPWHLGKLEID
28	51	1678	DENV-4-NS1	TVGPWHLGKLEIDFG
29	51	1679	DENV-4-NS1	GPWHLGKLEIDFGEC
30	51	1680	DENV-4-NS1	WHLGKLEIDFGECPG
31	51	1681	DENV-4-NS1	LGKLEIDFGECPGTT
32	51	1682	DENV-4-NS1	KLEIDFGECPGTTVT
33	51	1683	DENV-4-NS1	EIDFGECPGTTVTIQ
34	51	1684	DENV-4-NS1	DFGECPGTTVTIQEN
35	51	1685	DENV-4-NS1	GECPGTTVTIQENCD
36	51	1686	DENV-4-NS1	CPGTTVTIQENCDHR
37	51	1687	DENV-4-NS1	GTTVTIQENCDHRGP
38	51	1688	DENV-4-NS1	TVTIQENCDHRGPSL
39	51	1689	DENV-4-NS1	TIQENCDHRGPSLRT
40	51	1690	DENV-4-NS1	QENCDHRGPSLRTTT
41	51	1691	DENV-4-NS1	NCDHRGPSLRTTTAS
42	51	1692	DENV-4-NS1	DHRGPSLRTTTASGK
43	51	1693	DENV-4-NS1	RGPSLRTTTASGKLV
44	51	1694	DENV-4-NS1	PSLRTTTASGKLVTQ
45	51	1695	DENV-4-NS1	LRTTTASGKLVTQWC
46	51	1696	DENV-4-NS1	TTTASGKLVTQWCCR
47	51	1697	DENV-4-NS1	TASGKLVTQWCCRSC
48	51	1698	DENV-4-NS1	SGKLVTQWCCRSCTM
49	51	1699	DENV-4-NS1	KLVTQWCCRSCTMPP
50	51	1700	DENV-4-NS1	VTQWCCRSCTMPPLR
51	51	1701	DENV-4-NS1	QWCCRSCTMPPLRFL
52	51	1702	DENV-4-NS1	CCRSCTMPPLRFLGE
53	51	1703	DENV-4-NS1	RSCTMPPLRFLGEDG
54	51	1704	DENV-4-NS1	CTMPPLRFLGEDGCW
55	51	1705	DENV-4-NS1	MPPLRFLGEDGCWYG
56	51	1706	DENV-4-NS1	PLRFLGEDGCWYGME
57	51	1707	DENV-4-NS1	RFLGEDGCWYGMEIR
58	51	1708	DENV-4-NS1	LGEDGCWYGMEIRPL
59	51	1709	DENV-4-NS1	EDGCWYGMEIRPLSE
60	51	1710	DENV-4-NS1	GCWYGMEIRPLSEKE
61	51	1711	DENV-4-NS1	WYGMEIRPLSEKEEN
62	51	1712	DENV-4-NS1	GMEIRPLSEKEENMV
63	51	1713	DENV-4-NS1	EIRPLSEKEENMVKS
64	51	1714	DENV-4-NS1	RPLSEKEENMVKSQV
65	51	1715	DENV-4-NS1	LSEKEENMVKSQVTA
66	51	1716	DENV-4-NS1	EKEENMVKSQVTAGS
1	53	1717	DENV-4-NS1	EENMVKSQVTAGSGS
2	53	1718	DENV-4-NS1	NMVKSQVTAGSGSGS
3	53	1719	DENV-4-ZIKV-NS1	VKSQVTAGSGSGSGD
4	53	1720	DENV-4-ZIKV-NS1	SQVTAGSGSGSGDVG
5	53	1721	DENV-4-ZIKV-NS1	VTAGSGSGSGDVGCS
6	53	1722	DENV-4-ZIKV-NS1	AGSGSGSGDVGCSVD
7	53	1723	ZIKV-NS1	SGSGSGDVGCSVDFS
8	53	1724	ZIKV-NS1	SGSGDVGCSVDFSKK
9	53	1725	ZIKV-NS1	SGDVGCSVDFSKKET
10	53	1726	ZIKV-NS1	DVGCSVDFSKKETRC
11	53	1727	ZIKV-NS1	GCSVDFSKKETRCGT
12	53	1728	ZIKV-NS1	SVDFSKKETRCGTGV
13	53	1729	ZIKV-NS1	DFSKKETRCGTGVFV
14	53	1730	ZIKV-NS1	SKKETRCGTGVFVYN
15	53	1731	ZIKV-NS1	KETRCGTGVFVYNDV
16	53	1732	ZIKV-NS1	TRCGTGVFVYNDVEA
17	53	1733	ZIKV-NS1	CGTGVFVYNDVEAWR
18	53	1734	ZIKV-NS1	TGVFVYNDVEAWRDR
19	53	1735	ZIKV-NS1	VFVYNDVEAWRDRYK
20	53	1736	ZIKV-NS1	VYNDVEAWRDRYKYH
21	53	1737	ZIKV-NS1	NDVEAWRDRYKYHPD
22	53	1738	ZIKV-NS1	VEAWRDRYKYHPDSP
23	53	1739	ZIKV-NS1	AWRDRYKYHPDSPRR
24	53	1740	ZIKV-NS1	RDRYKYHPDSPRRLA
25	53	1741	ZIKV-NS1	RYKYHPDSPRRLAAA
26	53	1742	ZIKV-NS1	KYHPDSPRRLAAAVK
27	53	1743	ZIKV-NS1	HPDSPRRLAAAVKQA
28	53	1744	ZIKV-NS1	DSPRRLAAAVKQAWE
29	53	1745	ZIKV-NS1	PRRLAAAVKQAWEDG
30	53	1746	ZIKV-NS1	RLAAAVKQAWEDGIC
31	53	1747	ZIKV-NS1	AAAVKQAWEDGICGI
32	53	1748	ZIKV-NS1	AVKQAWEDGICGISS
33	53	1749	ZIKV-NS1	KQAWEDGICGISSVS
34	53	1750	ZIKV-NS1	AWEDGICGISSVSRM
35	53	1751	ZIKV-NS1	EDGICGISSVSRMEN
36	53	1752	ZIKV-NS1	GICGISSVSRMENIM
37	53	1753	ZIKV-NS1	CGISSVSRMENIMWR
38	53	1754	ZIKV-NS1	ISSVSRMENIMWRSV
39	53	1755	ZIKV-NS1	SVSRMENIMWRSVEG
40	53	1756	ZIKV-NS1	SRMENIMWRSVEGEL
41	53	1757	ZIKV-NS1	MENIMWRSVEGELNA
42	53	1758	ZIKV-NS1	NIMWRSVEGELNAIL
43	53	1759	ZIKV-NS1	MWRSVEGELNAILEE
44	53	1760	ZIKV-NS1	RSVEGELNAILEENG
45	53	1761	ZIKV-NS1	VEGELNAILEENGVQ
46	53	1762	ZIKV-NS1	GELNAILEENGVQLT
47	53	1763	ZIKV-NS1	LNAILEENGVQLTVV
48	53	1764	ZIKV-NS1	AILEENGVQLTVVVG
49	53	1765	ZIKV-NS1	LEENGVQLTVVVGSV
50	53	1766	ZIKV-NS1	ENGVQLTVVVGSVKN
51	53	1767	ZIKV-NS1	GVQLTVVVGSVKNPM
52	53	1768	ZIKV-NS1	QLTVVVGSVKNPMWR
53	53	1769	ZIKV-NS1	TVVVGSVKNPMWRGP
54	53	1770	ZIKV-NS1	VVGSVKNPMWRGPQR
55	53	1771	ZIKV-NS1	GSVKNPMWRGPQRLP
56	53	1772	ZIKV-NS1	VKNPMWRGPQRLPVP
57	53	1773	ZIKV-NS1	NPMWRGPQRLPVPVN
58	53	1774	ZIKV-NS1	MWRGPQRLPVPVNEL
59	53	1775	ZIKV-NS1	RGPQRLPVPVNELPH
60	53	1776	ZIKV-NS1	PQRLPVPVNELPHGW
61	53	1777	ZIKV-NS1	RLPVPVNELPHGWKA
62	53	1778	ZIKV-NS1	PVPVNELPHGWKAWG
63	53	1779	ZIKV-NS1	PVNELPHGWKAWGKS
64	53	1780	ZIKV-NS1	NELPHGWKAWGKSYF
65	53	1781	ZIKV-NS1	LPHGWKAWGKSYFVR
66	53	1782	ZIKV-NS1	HGWKAWGKSYFVRAA
1	55	1783	ZIKV-NS1	WKAWGKSYFVRAAKT
2	55	1784	ZIKV-NS1	AWGKSYFVRAAKTNN
3	55	1785	ZIKV-NS1	GKSYFVRAAKTNNSF
4	55	1786	ZIKV-NS1	SYFVRAAKTNNSFVV
5	55	1787	ZIKV-NS1	FVRAAKTNNSFVVDG
6	55	1788	ZIKV-NS1	RAAKTNNSFVVDGDT
7	55	1789	ZIKV-NS1	AKTNNSFVVDGDTLK
8	55	1790	ZIKV-NS1	TNNSFVVDGDTLKEC
9	55	1791	ZIKV-NS1	NSFVVDGDTLKECPL
10	55	1792	ZIKV-NS1	FVVDGDTLKECPLKH
11	55	1793	ZIKV-NS1	VDGDTLKECPLKHRA
12	55	1794	ZIKV-NS1	GDTLKECPLKHRAWN
13	55	1795	ZIKV-NS1	TLKECPLKHRAWNSF
14	55	1796	ZIKV-NS1	KECPLKHRAWNSFLV
15	55	1797	ZIKV-NS1	CPLKHRAWNSFLVED
16	55	1798	ZIKV-NS1	LKHRAWNSFLVEDHG
17	55	1799	ZIKV-NS1	HRAWNSFLVEDHGFG
18	55	1800	ZIKV-NS1	AWNSFLVEDHGFGVF
19	55	1801	ZIKV-NS1	NSFLVEDHGFGVFHT
20	55	1802	ZIKV-NS1	FLVEDHGFGVFHTSV
21	55	1803	ZIKV-NS1	VEDHGFGVFHTSVWL
22	55	1804	ZIKV-NS1	DHGFGVFHTSVWLKV
23	55	1805	ZIKV-NS1	GFGVFHTSVWLKVRE
24	55	1806	ZIKV-NS1	GVFHTSVWLKVREDY
25	55	1807	ZIKV-NS1	FHTSVWLKVREDYSL
26	55	1808	ZIKV-NS1	TSVWLKVREDYSLEC
27	55	1809	ZIKV-NS1	VWLKVREDYSLECDP
28	55	1810	ZIKV-NS1	LKVREDYSLECDPAV
29	55	1811	ZIKV-NS1	VREDYSLECDPAVIG
30	55	1812	ZIKV-NS1	EDYSLECDPAVIGTA
31	55	1813	ZIKV-NS1	YSLECDPAVIGTAVK
32	55	1814	ZIKV-NS1	LECDPAVIGTAVKGK
33	55	1815	ZIKV-NS1	CDPAVIGTAVKGKEA
34	55	1816	ZIKV-NS1	PAVIGTAVKGKEAVH
35	55	1817	ZIKV-NS1	VIGTAVKGKEAVHSD
36	55	1818	ZIKV-NS1	GTAVKGKEAVHSDLG
37	55	1819	ZIKV-NS1	AVKGKEAVHSDLGYW
38	55	1820	ZIKV-NS1	KGKEAVHSDLGYWIE
39	55	1821	ZIKV-NS1	KEAVHSDLGYWIESE
40	55	1822	ZIKV-NS1	AVHSDLGYWIESEKN
41	55	1823	ZIKV-NS1	HSDLGYWIESEKNDT
42	55	1824	ZIKV-NS1	DLGYWIESEKNDTWR
43	55	1825	ZIKV-NS1	GYWIESEKNDTWRLK
44	55	1826	ZIKV-NS1	WIESEKNDTWRLKRA
45	55	1827	ZIKV-NS1	ESEKNDTWRLKRAHL
46	55	1828	ZIKV-NS1	EKNDTWRLKRAHLIE
47	55	1829	ZIKV-NS1	NDTWRLKRAHLIEMK
48	55	1830	ZIKV-NS1	TWRLKRAHLIEMKTC
49	55	1831	ZIKV-NS1	RLKRAHLIEMKTCEW
50	55	1832	ZIKV-NS1	KRAHLIEMKTCEWPK
51	55	1833	ZIKV-NS1	AHLIEMKTCEWPKSH
52	55	1834	ZIKV-NS1	LIEMKTCEWPKSHTL
53	55	1835	ZIKV-NS1	EMKTCEWPKSHTLWT
54	55	1836	ZIKV-NS1	KTCEWPKSHTLWTDG
55	55	1837	ZIKV-NS1	CEWPKSHTLWTDGIE
56	55	1838	ZIKV-NS1	WPKSHTLWTDGIEES
57	55	1839	ZIKV-NS1	KSHTLWTDGIEESDL
58	55	1840	ZIKV-NS1	HTLWTDGIEESDLII
59	55	1841	ZIKV-NS1	LWTDGIEESDLIIPK
60	55	1842	ZIKV-NS1	TDGIEESDLIIPKSL
61	55	1843	ZIKV-NS1	GIEESDLIIPKSLAG
62	55	1844	ZIKV-NS1	EESDLIIPKSLAGPL
63	55	1845	ZIKV-NS1	SDLIIPKSLAGPLSH
64	55	1846	ZIKV-NS1	LIIPKSLAGPLSHHN
65	55	1847	ZIKV-NS1	IPKSLAGPLSHHNTR
66	55	1848	ZIKV-NS1	KSLAGPLSHHNTREG
1	57	1849	ZIKV-NS1	LAGPLSHHNTREGYR
2	57	1850	ZIKV-NS1	GPLSHHNTREGYRTQ
3	57	1851	ZIKV-NS1	LSHHNTREGYRTQMK
4	57	1852	ZIKV-NS1	HHNTREGYRTQMKGP
5	57	1853	ZIKV-NS1	NTREGYRTQMKGPWH
6	57	1854	ZIKV-NS1	REGYRTQMKGPWHSE
7	57	1855	ZIKV-NS1	GYRTQMKGPWHSEEL
8	57	1856	ZIKV-NS1	RTQMKGPWHSEELEI
9	57	1857	ZIKV-NS1	QMKGPWHSEELEIRF
10	57	1858	ZIKV-NS1	KGPWHSEELEIRFEE
11	57	1859	ZIKV-NS1	PWHSEELEIRFEECP
12	57	1860	ZIKV-NS1	HSEELEIRFEECPGT
13	57	1861	ZIKV-NS1	EELEIRFEECPGTKV
14	57	1862	ZIKV-NS1	LEIRFEECPGTKVHV
15	57	1863	ZIKV-NS1	IRFEECPGTKVHVEE
16	57	1864	ZIKV-NS1	FEECPGTKVHVEETC
17	57	1865	ZIKV-NS1	ECPGTKVHVEETCGT
18	57	1866	ZIKV-NS1	PGTKVHVEETCGTRG
19	57	1867	ZIKV-NS1	TKVHVEETCGTRGPS
20	57	1868	ZIKV-NS1	VHVEETCGTRGPSLR
21	57	1869	ZIKV-NS1	VEETCGTRGPSLRST
22	57	1870	ZIKV-NS1	ETCGTRGPSLRSTTA
23	57	1871	ZIKV-NS1	CGTRGPSLRSTTASG
24	57	1872	ZIKV-NS1	TRGPSLRSTTASGRV
25	57	1873	ZIKV-NS1	GPSLRSTTASGRVIE
26	57	1874	ZIKV-NS1	SLRSTTASGRVIEEW
27	57	1875	ZIKV-NS1	RSTTASGRVIEEWCC
28	57	1876	ZIKV-NS1	TTASGRVIEEWCCRE
29	57	1877	ZIKV-NS1	ASGRVIEEWCCRECT
30	57	1878	ZIKV-NS1	GRVIEEWCCRECTMP
31	57	1879	ZIKV-NS1	VIEEWCCRECTMPPL
32	57	1880	ZIKV-NS1	EEWCCRECTMPPLSF
33	57	1881	ZIKV-NS1	WCCRECTMPPLSFRA
34	57	1882	ZIKV-NS1	CRECTMPPLSFRAKD
35	57	1883	ZIKV-NS1	ECTMPPLSFRAKDGC
36	57	1884	ZIKV-NS1	TMPPLSFRAKDGCWY
37	57	1885	ZIKV-NS1	PPLSFRAKDGCWYGM
38	57	1886	ZIKV-NS1	LSFRAKDGCWYGMEI
39	57	1887	ZIKV-NS1	FRAKDGCWYGMEIRP
40	57	1888	ZIKV-NS1	AKDGCWYGMEIRPRK
41	57	1889	ZIKV-NS1	DGCWYGMEIRPRKEP
42	57	1890	ZIKV-NS1	CWYGMEIRPRKEPES
43	57	1891	ZIKV-NS1	YGMEIRPRKEPESNL
44	57	1892	ZIKV-NS1	MEIRPRKEPESNLVR
45	57	1893	ZIKV-NS1	IRPRKEPESNLVRSM
46	57	1894	ZIKV-NS1	PRKEPESNLVRSMVT
47	57	1895	ZIKV-NS1	KEPESNLVRSMVTAG
48	57	1896	ZIKV-NS1	PESNLVRSMVTAGSG
49	57	1897	ZIKV-NS1	SNLVRSMVTAGSGSG
50	57	1898	ZIKV-NS1	LVRSMVTAGSGSGSG

## Sheet: Z6-Z7
Peptide code	Virus-Protein	Peptides sequence	Intensity	Epitopes sequence	Virus-Protein	Peptides	Epitopes
10	DENV-1-E	VEGLSGATWVDVVLE	0.290382	VEGLSGATWVDVVLE	DENV-1-E	5	5
41	DENV-1-E	CPTQGEATLVEEQDA	1.0931	CPTQGEATLVEEQDA	DENV-2-E	12	8
85	DENV-1-E	ATITPQAPTSEIQLT	1.5692	ATITPQAPTSEIQLT	DENV-3-E	9	7
129	DENV-1-E	VVVLGSQEGAMHTAL	0.599413	VVVLGSQEGAMHTAL	DENV-4-E	5	4
172	DENV-1-E	PFSTQDEKGVTQNGR	1.18647	PFSTQDEKGVTQNGR	ZIKV-E	9	7
239	DENV-2-E	TESRCPTQGEPSLNE	2.86886		DENV-1-NS1	7	5
240	DENV-2-E	SRCPTQGEPSLNEEQ	2.45878		DENV-2-NS1	9	7
241	DENV-2-E	CPTQGEPSLNEEQDK	1.74364		DENV-3-NS1	8	7
242	DENV-2-E	TQGEPSLNEEQDKRF	2.06089	TQGEPSLNE	DENV-4-NS1	4	3
267	DENV-2-E	EGKIVQPENLEYTIV	3.50732		ZIKV-NS1	7	7
268	DENV-2-E	KIVQPENLEYTIVIT	1.40444	KIVQPENLEYTIV	TOTAL	75	60
297	DENV-2-E	SPRTGLDFNEMVLLQ	0.082142	SPRTGLDFNEMVLLQ
304	DENV-2-E	QMEDKAWLVHRQWFL	0.0747435	QMEDKAWLVHRQWFL
319	DENV-2-E	NWIQKETLVTFKNPH	0.968796	NWIQKETLVTFKNPH
329	DENV-2-E	VVVLGSQEGAMHTAL	0.401202	VVVLGSQEGAMHTAL
368	DENV-2-E	GDGSPCKIPFEITDL	0.86656	GDGSPCKIPFEITDL
393	DENV-2-E	IIVGVEPGQLKLNWF	0.0126538	IIVGVEPGQLKLNWF
433	DENV-3-E	KLCIEGKITNITTDS	0.344563	KLCIEGKITNITTDS
441	DENV-3-E	CPTQGEAVLPEEQDQ	0.621531	CPTQGEAVLPEEQDQ
444	DENV-3-E	AVLPEEQDQNYVCKH	2.11619
445	DENV-3-E	LPEEQDQNYVCKHTY	2.44419
446	DENV-3-E	EEQDQNYVCKHTYVD	0.307832	EEQDQNYVCKH
474	DENV-3-E	IITVHTGDQHQVGNE	0.139953	IITVHTGDQHQVGNE
505	DENV-3-E	KAWMVHRQWFFDLPL	0.00275566	KAWMVHRQWFFDLPL
528	DENV-3-E	VVVLGSQEGAMHTAL	0.942224	VVVLGSQEGAMHTAL
559	DENV-3-E	VSETQHGTILIKVEY	0.585813	VSETQHGTILIKVEY
597	DENV-3/4-E	KINWYKGSGSGSGMR	0.405945
619	DENV-4-E	TTMAQGKPTLDFELT	0.275637
620	DENV-4-E	MAQGKPTLDFELTKT	0.0157884	MAQGKPTLDFELT
637	DENV-4-E	ITTATRCPTQGEPYL	0.0989286	ITTATRCPTQGEPYL
666	DENV-4-E	TGNLVQIENLEYTVV	1.76207	TGNLVQIENLEYTVV
694	DENV-4-E	TLDCEPRSGIDFNEM	1.14224	TLDCEPRSGIDFNEM
797	DENV-4/ZIKV-E	TLHWFRGSGSGSGMR	0.209969	TLHWFRGSGSGSGMR
841	ZIKV-E	TQGEAYLDKQSDTQY	0.0443665	TQGEAYLDKQSDTQY
845	ZIKV-E	KQSDTQYVCKRTLVD	0.933493	KQSDTQYVCKRTLVD
866	ZIKV-E	TGKSIQPENLEYRIM	2.63309
867	ZIKV-E	KSIQPENLEYRIMLS	0.145521	KSIQPENLEYRIM
893	ZIKV-E	LGGFGSLGLDCEPRT	0.634458	LGGFGSLGLDCEPRT
905	ZIKV-E	LTMNNKHWLVHKEWF	0.280401
906	ZIKV-E	MNNKHWLVHKEWFHD	2.0766	MNNKHWLVHKEWF
950	ZIKV-E	KMDKLRLKGVSYSLC	2.22182	KMDKLRLKGVSYSLC
991	ZIKV-E	LELDPPFGDSYIVIG	0.358595	LELDPPFGDSYIVIG
1062	DENV-1-NS1	MEHKYSWKSWGKAKI	0.307832	MEHKYSWKSWGKAKI
1075	DENV-1-NS1	IDGPDTPECPDGQRA	1.69202	IDGPDTPECPDGQRA
1091	DENV-1-NS1	IWLKLRDSYTQMCDH	2.00296	IWLKLRDSYTQMCDH
1142	DENV-1-NS1	HLGKLELDFDLCEGT	0.138191
1143	DENV-1-NS1	GKLELDFDLCEGTTV	0.574347
1144	DENV-1-NS1	LELDFDLCEGTTVVV	2.21061	LELDFDLCEGT
1150	DENV-1-NS1	VVVDEHCGNRGPSLR	2.30553	VVVDEHCGNRGPSLR
1211	DENV-2-NS1	KAHEEGICGIRSVTR	0.138747	KAHEEGICGIRSVTR
1220	DENV-2-NS1	LMWKQITPELNHILS	1.52921
1221	DENV-2-NS1	WKQITPELNHILSEN	2.47216	WKQITPELNHILS
1263	DENV-2-NS1	SLEVEDYGFGVFTTN	0.0443665	SLEVEDYGFGVFTTN
1274	DENV-2-NS1	KQDVFCDSKLMSAAI	1.08581	KQDVFCDSKLMSAAI
1284	DENV-2-NS1	VHADMGYWIESALND	1.91456
1285	DENV-2-NS1	ADMGYWIESALNDTW	2.49428	ADMGYWIESALND
1293	DENV-2-NS1	MEKASFIEVKSCHWP	0.612402	MEKASFIEVKSCHWP
1345	DENV-2-NS1	CTLPPLRYRGEDGCW	2.22898	CTLPPLRYRGEDGCW
1398	DENV-3-NS1	MENLLWKQIANELNY	1.52551	MENLLWKQIANELNY
1406	DENV-3-NS1	LWENNIKLTVVVGDI	0.804462	LWENNIKLTVVVGDI
1408	DENV-3-NS1	NIKLTVVVGDIIGVL	0.721722
1409	DENV-3-NS1	KLTVVVGDIIGVLEQ	0.962307	KLTVVVGDIIGVL
1439	DENV-3-NS1	SASRAWNVWEVEDYG	1.41633	SASRAWNVWEVEDYG
1462	DENV-3-NS1	ERAVHADMGYWIESQ	0.900985	ERAVHADMGYWIESQ
1473	DENV-3-NS1	EKASLIEVKTCTWPK	1.28736	EKASLIEVKTCTWPK
1490	DENV-3-NS1	LAGPISQHNHRPGYH	0.703778	LAGPISQHNHRPGYH
1555	DENV-4-NS1	GIFVVDNVHTWTEQY	0.178465	GIFVVDNVHTWTEQY
1649	DENV-4-NS1	KNQTWQIERASLIEV	0.374623	KNQTWQIERASLIEV
1662	DENV-4-NS1	WSNGVLESQMLIPKS	2.45494
1663	DENV-4-NS1	NGVLESQMLIPKSYA	1.23868	NGVLESQMLIPKS
1730	ZIKV-NS1	SKKETRCGTGVFVYN	0.0747435	SKKETRCGTGVFVYN
1735	ZIKV-NS1	VFVYNDVEAWRDRYK	0.694223	VFVYNDVEAWRDRYK
1765	ZIKV-NS1	LEENGVQLTVVVGSV	2.7137	LEENGVQLTVVVGSV
1798	ZIKV-NS1	LKHRAWNSFLVEDHG	0.118037	LKHRAWNSFLVEDHG
1806	ZIKV-NS1	GVFHTSVWLKVREDY	0.134224	GVFHTSVWLKVREDY
1870	ZIKV-NS1	ETCGTRGPSLRSTTA	0.552082	ETCGTRGPSLRSTTA
1884	ZIKV-NS1	TMPPLSFRAKDGCWY	0.780401	TMPPLSFRAKDGCWY

## Sheet: Z1-Z2
Peptide code	Virus-Protein	Peptides sequence	Intensity	Epitopes sequence	Virus-Protein	Peptides	Epitopes
2	DENV-1-E	GSGSGMRCVGIGNRD	0.661184		DENV-1-E	43	22
4	DENV-1-E	GMRCVGIGNRDFVEG	0.446252		DENV-2-E	57	25
5	DENV-1-E	RCVGIGNRDFVEGLS	0.548412	RCVGIGNRDFVEGLS	DENV-3-E	43	21
11	DENV-1-E	GLSGATWVDVVLEHG	0.103446	GLSGATWVDVVLEHG	DENV-4-E	49	21
14	DENV-1-E	WVDVVLEHGSCVTTM	1.8408		ZIKV-E	37	20
15	DENV-1-E	DVVLEHGSCVTTMAK	3.87723		DENV-1-NS1	38	21
16	DENV-1-E	VLEHGSCVTTMAKNK	0.822148		DENV-2-NS1	35	18
17	DENV-1-E	EHGSCVTTMAKNKPT	0.572745		DENV-3-NS1	45	20
18	DENV-1-E	GSCVTTMAKNKPTLD	3.49066		DENV-4-NS1	40	19
19	DENV-1-E	CVTTMAKNKPTLDIE	2.54853		ZIKV-NS1	61	23
20	DENV-1-E	TTMAKNKPTLDIELL	1.34498	TTM	TOTAL	448	210
33	DENV-1-E	KLCIEAKISNTTTDS	1.0114	KLCIEAKISNTTTDS
39	DENV-1-E	TDSRCPTQGEATLVE	0.885838	TDSRCPTQGEATLVE
42	DENV-1-E	TQGEATLVEEQDANF	0.660326	TQGEATLVEEQDANF
44	DENV-1-E	ATLVEEQDANFVCRR	1.04477
45	DENV-1-E	LVEEQDANFVCRRTF	1.14515	LVEEQDANFVCRR
51	DENV-1-E	RTFVDRGWGNGCGLF	0.299604	RTFVDRGWGNGCGLF
89	DENV-1-E	TSEIQLTDYGALTLD	0.385838	TSEIQLTDYGALTLD
94	DENV-1-E	ALTLDCSPRTGLDFN	1.5962	ALTLDCSPRTGLDFN
98	DENV-1-E	RTGLDFNEMVLLTMK	2.69284	RTGLDFNEMVLLTMK
100	DENV-1-E	DFNEMVLLTMKEKSW	3.81194	DFNEMVLLTMKEKSW
104	DENV-1-E	TMKEKSWLVHKQWFL	6.43976	TMKEKSWLVHKQWFL
106	DENV-1-E	KSWLVHKQWFLDLPL	1.17815	KSWLVHKQWFLDLPL
114	DENV-1-E	WTSGASTSQETWNRQ	0.788063
115	DENV-1-E	SGASTSQETWNRQDL	1.65816
116	DENV-1-E	ASTSQETWNRQDLLV	3.60826
117	DENV-1-E	TSQETWNRQDLLVTF	1.97797
118	DENV-1-E	QETWNRQDLLVTFKT	3.40124	QETWNRQ
124	DENV-1-E	FKTAHAKKQEVVVLG	0.344009	FKTAHAKKQEVVVLG
126	DENV-1-E	HAKKQEVVVLGSQEG	1.26181	HAKKQEVVVLGSQEG
128	DENV-1-E	QEVVVLGSQEGAMHT	0.668087	QEVVVLGSQEGAMHT
165	DENV-1-E	VQVKYEGTDAPCKIP	3.9852
166	DENV-1-E	VKYEGTDAPCKIPFS	2.71111
167	DENV-1-E	YEGTDAPCKIPFSTQ	1.42877
168	DENV-1-E	GTDAPCKIPFSTQDE	0.895927	GTDAPCKIP
172	DENV-1-E	PFSTQDEKGVTQNGR	0.310964	PFSTQDEKGVTQNGR
181	DENV-1-E	ANPIVTDKEKPVNIE	1.01816
182	DENV-1-E	PIVTDKEKPVNIETE	1.91413
183	DENV-1-E	VTDKEKPVNIETEPP	1.73455
184	DENV-1-E	DKEKPVNIETEPPFG	1.84607
185	DENV-1-E	EKPVNIETEPPFGES	5.72767
186	DENV-1-E	PVNIETEPPFGESYI	3.87375	PVNIE
189	DENV-1-E	EPPFGESYIVVGAGE	0.333161	EPPFGESYIVVGAGE
201	DENV-2-E	GSGSGSGMRCIGISN	0.344009
202	DENV-2-E	GSGSGMRCIGISNRD	2.23453
203	DENV-2-E	GSGMRCIGISNRDFV	0.621738
204	DENV-2-E	GMRCIGISNRDFVEG	1.75525
205	DENV-2-E	RCIGISNRDFVEGVS	0.745299	RCIGISNRDFVEGVS
207	DENV-2-E	ISNRDFVEGVSGGSW	0.701644
208	DENV-2-E	NRDFVEGVSGGSWVD	0.498484	NRDFVEGVSGGSW
214	DENV-2-E	WVDIVLEHGSCVTTM	2.47197
215	DENV-2-E	DIVLEHGSCVTTMAK	3.58611
216	DENV-2-E	VLEHGSCVTTMAKNK	3.09906
217	DENV-2-E	EHGSCVTTMAKNKPT	0.532436
218	DENV-2-E	GSCVTTMAKNKPTLD	3.54513
219	DENV-2-E	CVTTMAKNKPTLDFE	0.829363
220	DENV-2-E	TTMAKNKPTLDFELI	1.96031	TTM
221	DENV-2-E	MAKNKPTLDFELIKT	2.81659
222	DENV-2-E	KNKPTLDFELIKTEA	0.256212	KNKPTLDFELIKT
239	DENV-2-E	TESRCPTQGEPSLNE	1.40114
240	DENV-2-E	SRCPTQGEPSLNEEQ	0.858782	SRCPTQGEPSLNE
242	DENV-2-E	TQGEPSLNEEQDKRF	2.95916	TQGEPSLNEEQDKRF
246	DENV-2-E	EEQDKRFICKHSMVD	4.87584	EEQDKRFICKHSMVD
249	DENV-2-E	FICKHSMVDRGWGNG	3.49406	FICKHSMVDRGWGNG
251	DENV-2-E	HSMVDRGWGNGCGLF	0.201644	HSMVDRGWGNGCGLF
260	DENV-2-E	GIVTCAMFTCKKNME	0.865227	GIVTCAMFTCKKNME
266	DENV-2-E	NMEGKIVQPENLEYT	2.60048	NMEGKIVQPENLEYT
271	DENV-2-E	NLEYTIVITPHSGEE	0.444358	NLEYTIVITPHSGEE
282	DENV-2-E	GKHGKEIKITPQSST	5.29825	GKHGKEIKITPQSST
289	DENV-2-E	TTEAELTGYGTVTME	2.76224	TTEAELTGYGTVTME
291	DENV-2-E	ELTGYGTVTMECSPR	5.04384
292	DENV-2-E	TGYGTVTMECSPRTG	1.77282
293	DENV-2-E	YGTVTMECSPRTGLD	3.18662
294	DENV-2-E	TVTMECSPRTGLDFN	4.05227
295	DENV-2-E	TMECSPRTGLDFNEM	5.87863	TMECSPR
297	DENV-2-E	SPRTGLDFNEMVLLQ	0.701644
298	DENV-2-E	RTGLDFNEMVLLQME	2.19358
299	DENV-2-E	GLDFNEMVLLQMEDK	2.42957
300	DENV-2-E	DFNEMVLLQMEDKAW	2.6648
301	DENV-2-E	NEMVLLQMEDKAWLV	2.97718
302	DENV-2-E	MVLLQMEDKAWLVHR	3.59865
303	DENV-2-E	LLQMEDKAWLVHRQW	3.39045	LLQ
304	DENV-2-E	QMEDKAWLVHRQWFL	4.33856	QMEDKAWLVHRQWFL
306	DENV-2-E	KAWLVHRQWFLDLPL	1.13778	KAWLVHRQWFLDLPL
308	DENV-2-E	VHRQWFLDLPLPWLP	1.79682	VHRQWFLDLPLPWLP
313	DENV-2-E	LPWLPGADTQGSNWI	0.188408	LPWLPGADTQGSNWI
365	DENV-2-E	IRVQYEGDGSPCKIP	4.2524
366	DENV-2-E	VQYEGDGSPCKIPFE	2.69467
367	DENV-2-E	YEGDGSPCKIPFEIT	4.39177
368	DENV-2-E	GDGSPCKIPFEITDL	0.339063	GDGSPCKIP
370	DENV-2-E	PCKIPFEITDLEKRH	0.507123
371	DENV-2-E	KIPFEITDLEKRHVL	1.00492	KIPFEITDLEKRH
378	DENV-2-E	LGRLITVNPIVTEKD	1.5525	LGRLITVNPIVTEKD
381	DENV-2-E	VNPIVTEKDSPVNIE	3.76626
382	DENV-2-E	PIVTEKDSPVNIEAE	5.85947
383	DENV-2-E	VTEKDSPVNIEAEPP	3.83746
384	DENV-2-E	EKDSPVNIEAEPPFG	3.10725
385	DENV-2-E	DSPVNIEAEPPFGDS	3.02204
386	DENV-2-E	PVNIEAEPPFGDSYI	2.45457	PVNIE
393	DENV-2-E	IIVGVEPGQLKLNWF	0.930548	IIVGVEPGQLKLNWF
402	DENV-3-E	GSGSGMRCVGVGNRD	1.49998
404	DENV-3-E	GMRCVGVGNRDFVEG	0.0339708
414	DENV-3-E	WVDVVLEHGGCVTTM	0.799604
415	DENV-3-E	DVVLEHGGCVTTMAK	3.69232
416	DENV-3-E	VLEHGGCVTTMAKNK	2.83523
417	DENV-3-E	EHGGCVTTMAKNKPT	1.05111
418	DENV-3-E	GGCVTTMAKNKPTLD	3.55264
419	DENV-3-E	CVTTMAKNKPTLDIE	1.39266
420	DENV-3-E	TTMAKNKPTLDIELQ	3.37266	TTM
424	DENV-3-E	TLDIELQKTEATQLA	0.712039	TLDIELQKTEATQLA
441	DENV-3-E	CPTQGEAVLPEEQDQ	3.59105
442	DENV-3-E	TQGEAVLPEEQDQNY	0.964544	TQGEAVLPEEQDQ
451	DENV-3-E	HTYVDRGWGNGCGLF	0.733709	HTYVDRGWGNGCGLF
460	DENV-3-E	SLVTCAKFQCLEPIE	0.532436	SLVTCAKFQCLEPIE
466	DENV-3-E	PIEGKVVQYENLKYT	0.906382	PIEGKVVQYENLKYT
493	DENV-3-E	TLGLECSPRTGLDFN	0.952484	TLGLECSPRTGLDFN
497	DENV-3-E	RTGLDFNEMILLTMK	3.18874	RTGLDFNEMILLTMK
499	DENV-3-E	DFNEMILLTMKNKAW	3.51565	DFNEMILLTMKNKAW
502	DENV-3-E	LLTMKNKAWMVHRQW	0.0406802
503	DENV-3-E	TMKNKAWMVHRQWFF	6.11043	TMKNKAWMVHRQW
505	DENV-3-E	KAWMVHRQWFFDLPL	2.5205
506	DENV-3-E	WMVHRQWFFDLPLPW	0.530794	WMVHRQWFFDLPL
527	DENV-3-E	QEVVVLGSQEGAMHT	0.434928	QEVVVLGSQEGAMHT
531	DENV-3-E	QEGAMHTALTGATEI	0.905877	QEGAMHTALTGATEI
535	DENV-3-E	LTGATEIQNSGGTSI	0.375606	LTGATEIQNSGGTSI
556	DENV-3-E	FVLKKEVSETQHGTI	1.42055	FVLKKEVSETQHGTI
564	DENV-3-E	IKVEYKGEDAPCKIP	4.24043
565	DENV-3-E	VEYKGEDAPCKIPFS	3.41603
566	DENV-3-E	YKGEDAPCKIPFSTE	3.16982	YKGEDAPCKIP
571	DENV-3-E	PFSTEDGQGKAHNGR	0.532436	PFSTEDGQGKAHNGR
575	DENV-3-E	GKAHNGRLITANPVV	3.62081	GKAHNGRLITANPVV
580	DENV-3-E	ANPVVTKKEEPVNIE	3.78239
581	DENV-3-E	PVVTKKEEPVNIEAE	8.38925
582	DENV-3-E	VTKKEEPVNIEAEPP	5.45736
583	DENV-3-E	KKEEPVNIEAEPPFG	3.77292
584	DENV-3-E	EEPVNIEAEPPFGES	2.36746
585	DENV-3-E	PVNIEAEPPFGESNI	4.08536	PVNIE
587	DENV-3-E	EAEPPFGESNIVIGI	0.344009
588	DENV-3-E	EPPFGESNIVIGIGD	2.9512
589	DENV-3-E	PFGESNIVIGIGDNA	1.75407	PFGESNIVIGI
591	DENV-3-E	SNIVIGIGDNALKIN	0.188408
592	DENV-3-E	IVIGIGDNALKINWY	1.07239	IVIGIGDNALKIN
596	DENV-3-E	ALKINWYKGSGSGSG	0.118319
601	DENV-4-E	GSGSGMRCVGVGNRD	0.147177
606	DENV-4-E	VGNRDFVEGVSGGAW	0.0406802	VGNRDFVEGVSGGAW
613	DENV-4-E	WVDLVLEHGGCVTTM	0.00712312
614	DENV-4-E	DLVLEHGGCVTTMAQ	2.8771	DLVLEHGGCVTTM
617	DENV-4-E	GGCVTTMAQGKPTLD	3.03241
618	DENV-4-E	CVTTMAQGKPTLDFE	0.230271
619	DENV-4-E	TTMAQGKPTLDFELT	3.4143
620	DENV-4-E	MAQGKPTLDFELTKT	2.98677
621	DENV-4-E	QGKPTLDFELTKTTA	1.64478
622	DENV-4-E	KPTLDFELTKTTAKE	2.07621
623	DENV-4-E	TLDFELTKTTAKEVA	2.42186	TLD
626	DENV-4-E	TKTTAKEVALLRTYC	1.81243	TKTTAKEVALLRTYC
633	DENV-4-E	CIEALISNITTATRC	2.31223	CIEALISNITTATRC
642	DENV-4-E	GEPYLKEEQDQQYIC	0.524097
643	DENV-4-E	PYLKEEQDQQYICRR	0.915691
644	DENV-4-E	LKEEQDQQYICRRDV	0.322148
645	DENV-4-E	EEQDQQYICRRDVVD	0.595899
646	DENV-4-E	QDQQYICRRDVVDRG	0.766506
647	DENV-4-E	QQYICRRDVVDRGWG	0.251087
648	DENV-4-E	YICRRDVVDRGWGNG	0.188408	YIC
650	DENV-4-E	RDVVDRGWGNGCGLF	0.714642	RDVVDRGWGNGCGLF
660	DENV-4-E	VTCAKFSCSGKITGN	5.38458	VTCAKFSCSGKITGN
662	DENV-4-E	KFSCSGKITGNLVQI	2.65623
663	DENV-4-E	SCSGKITGNLVQIEN	1.91561
664	DENV-4-E	SGKITGNLVQIENLE	0.0406802	SGKITGNLVQI
690	DENV-4-E	KLPDYGELTLDCEPR	0.549082
691	DENV-4-E	PDYGELTLDCEPRSG	0.0406802	PDYGELTLDCEPR
696	DENV-4-E	EPRSGIDFNEMILMK	4.80826
697	DENV-4-E	RSGIDFNEMILMKMK	3.32435
698	DENV-4-E	GIDFNEMILMKMKKK	2.09506	GIDFNEMILMK
701	DENV-4-E	MILMKMKKKTWLVHK	1.49182	MILMKMKKKTWLVHK
705	DENV-4-E	KTWLVHKQWFLDLPL	1.96153	KTWLVHKQWFLDLPL
749	DENV-4-E	LRIKGMSYTMCSGKF	2.90711	LRIKGMSYTMCSGKF
753	DENV-4-E	TMCSGKFSIDKEMAE	5.73592	TMCSGKFSIDKEMAE
758	DENV-4-E	KEMAETQHGTTVVKV	0.00712312	KEMAETQHGTTVVKV
765	DENV-4-E	VKYEGAGAPCKVPIE	3.23131
766	DENV-4-E	YEGAGAPCKVPIEIR	3.44514
767	DENV-4-E	GAGAPCKVPIEIRDV	3.83738	GAGAPCKVPIE
777	DENV-4-E	VGRVISATPLAENTN	4.10217
778	DENV-4-E	RVISATPLAENTNSV	3.39064
779	DENV-4-E	ISATPLAENTNSVTN	1.95059
780	DENV-4-E	ATPLAENTNSVTNIE	2.41784
781	DENV-4-E	PLAENTNSVTNIELE	1.38199
782	DENV-4-E	AENTNSVTNIELEPP	0.875606
783	DENV-4-E	NTNSVTNIELEPPFG	0.694198	NTN
784	DENV-4-E	NSVTNIELEPPFGDS	1.5592	NSVTNIELEPPFGDS
786	DENV-4-E	NIELEPPFGDSYIVI	1.07029	NIELEPPFGDSYIVI
791	DENV-4-E	SYIVIGVGNSALTLH	0.0727454
792	DENV-4-E	IVIGVGNSALTLHWF	0.161184	IVIGVGNSALTLH
801	ZIKV-E	GSGSGMRCIGVSNRD	0.288063
803	ZIKV-E	GMRCIGVSNRDFVEG	0.895927
832	ZIKV-E	SYCYEASISDMASDS	4.7575	SYCYEASISDMASDS
834	ZIKV-E	EASISDMASDSRCPT	0.674925	EASISDMASDSRCPT
837	ZIKV-E	MASDSRCPTQGEAYL	4.48034
838	ZIKV-E	SDSRCPTQGEAYLDK	5.2459
839	ZIKV-E	SRCPTQGEAYLDKQS	2.01873	SRCPTQGEAYL
841	ZIKV-E	TQGEAYLDKQSDTQY	3.40983	TQGEAYLDKQSDTQY
861	ZIKV-E	CAKFACSKKMTGKSI	0.925374	CAKFACSKKMTGKSI
865	ZIKV-E	KMTGKSIQPENLEYR	3.29883	KMTGKSIQPENLEYR
889	ZIKV-E	NSPRAEATLGGFGSL	2.7151
890	ZIKV-E	PRAEATLGGFGSLGL	0.214642	PRAEATLGGFGSL
899	ZIKV-E	PRTGLDFSDLYYLTM	0.163103
900	ZIKV-E	TGLDFSDLYYLTMNN	2.98355	TGLDFSDLYYLTM
902	ZIKV-E	FSDLYYLTMNNKHWL	0.788367	FSDLYYLTMNNKHWL
905	ZIKV-E	LTMNNKHWLVHKEWF	0.524097
906	ZIKV-E	MNNKHWLVHKEWFHD	1.69934
907	ZIKV-E	NKHWLVHKEWFHDIP	1.20164
908	ZIKV-E	HWLVHKEWFHDIPLP	3.02667
909	ZIKV-E	LVHKEWFHDIPLPWH	2.15927
910	ZIKV-E	HKEWFHDIPLPWHAG	0.770396
911	ZIKV-E	EWFHDIPLPWHAGAD	0.524097	EWFHD
914	ZIKV-E	PLPWHAGADTGTPHW	2.19218	PLPWHAGADTGTPHW
919	ZIKV-E	GTPHWNNKEALVEFK	1.1698
920	ZIKV-E	PHWNNKEALVEFKDA	0.523753	PHWNNKEALVEFK
927	ZIKV-E	AHAKRQTVVVLGSQE	0.618319	AHAKRQTVVVLGSQE
961	ZIKV-E	KIPAETLHGTVTVEV	0.967406	KIPAETLHGTVTVEV
967	ZIKV-E	VEVQYAGTDGPCKVP	3.29534
968	ZIKV-E	VQYAGTDGPCKVPAQ	0.354696	VQYAGTDGPCKVP
978	ZIKV-E	QTLTPVGRLITANPV	5.22538	QTLTPVGRLITANPV
980	ZIKV-E	PVGRLITANPVITES	4.23041
981	ZIKV-E	GRLITANPVITESTE	2.18888
982	ZIKV-E	LITANPVITESTENS	4.22739	LITANPVITES
985	ZIKV-E	VITESTENSKMMLEL	0.239955	VITESTENSKMMLEL
989	ZIKV-E	SKMMLELDPPFGDSY	0.864779
990	ZIKV-E	MMLELDPPFGDSYIV	1.42941	MMLELDPPFGDSY
993	ZIKV-E	PPFGDSYIVIGVGEK	1.01261	PPFGDSYIVIGVGEK
1003	ZIKV-E/DENV-1-NS1	WHRGSGSGSGDSGCV	1.31053
1015	DENV-1-NS1	CGSGIFVTNEVHTWT	0.800155
1016	DENV-1-NS1	SGIFVTNEVHTWTEQ	1.59346
1017	DENV-1-NS1	IFVTNEVHTWTEQYK	1.19973	IFVTNEVHTWT
1020	DENV-1-NS1	VHTWTEQYKFQADSP	2.97915
1021	DENV-1-NS1	TWTEQYKFQADSPKR	0.448351
1022	DENV-1-NS1	TEQYKFQADSPKRLS	0.344009	TEQYKFQADSP
1038	DENV-1-NS1	TRLENIMWKQISNEL	1.22498	TRLENIMWKQISNEL
1062	DENV-1-NS1	MEHKYSWKSWGKAKI	5.19943	MEHKYSWKSWGKAKI
1071	DENV-1-NS1	DIQNTTFIIDGPDTP	2.3006	DIQNTTFIIDGPDTP
1073	DENV-1-NS1	TTFIIDGPDTPECPD	0.132893	TTFIIDGPDTPECPD
1078	DENV-1-NS1	PECPDGQRAWNIWEV	2.10509
1079	DENV-1-NS1	CPDGQRAWNIWEVED	3.32953	CPDGQRAWNIWEV
1082	DENV-1-NS1	AWNIWEVEDYGFGVF	2.10223
1083	DENV-1-NS1	NIWEVEDYGFGVFTT	2.84554
1084	DENV-1-NS1	WEVEDYGFGVFTTNI	1.68424
1085	DENV-1-NS1	VEDYGFGVFTTNIWL	5.91962	VEDYGFGVF
1088	DENV-1-NS1	GVFTTNIWLKLRDSY	2.42229
1089	DENV-1-NS1	FTTNIWLKLRDSYTQ	1.53515	FTTNIWLKLRDSY
1091	DENV-1-NS1	IWLKLRDSYTQMCDH	0.322148	IWLKLRDSYTQMCDH
1102	DENV-1-NS1	KDSKAVHADMGYWIE	0.985995	KDSKAVHADMGYWIE
1127	DENV-1-NS1	SEMIIPKIFGGPISQ	0.333161	SEMIIPKIFGGPISQ
1131	DENV-1-NS1	FGGPISQHNYRPGYF	0.524196	FGGPISQHNYRPGYF
1133	DENV-1-NS1	ISQHNYRPGYFTQTA	4.27782
1134	DENV-1-NS1	QHNYRPGYFTQTAGP	2.29295
1135	DENV-1-NS1	NYRPGYFTQTAGPWH	0.118319	NYRPGYFTQTA
1138	DENV-1-NS1	FTQTAGPWHLGKLEL	0.51566	FTQTAGPWHLGKLEL
1150	DENV-1-NS1	VVVDEHCGNRGPSLR	3.70802	VVVDEHCGNRGPSLR
1156	DENV-1-NS1	SLRTTTVTGKIIHEW	0.842493	SLRTTTVTGKIIHEW
1161	DENV-1-NS1	IIHEWCCRSCTLPPL	0.425374
1162	DENV-1-NS1	HEWCCRSCTLPPLRF	0.739955
1163	DENV-1-NS1	WCCRSCTLPPLRFRG	0.405877	WCCRSCTLPPL
1172	DENV-1-NS1	CWYGMEIRPVKEKEE	2.48034	CWYGMEIRPVKEKEE
1174	DENV-1-NS1	MEIRPVKEKEENLVR	4.50422	MEIRPVKEKEENLVR
1176	DENV-1-NS1	PVKEKEENLVRSMVS	5.98237
1177	DENV-1-NS1	KEKEENLVRSMVSAG	3.74488	KEKEENLVRSMVS
1178	DENV-1-NS1	KEENLVRSMVSAGSG	3.95444
1179	DENV-1-NS1	ENLVRSMVSAGSGSG	5.71585
1180	DENV-1-NS1	LVRSMVSAGSGSGSG	3.68798
1181	DENV-1/2-NS1	RSMVSAGSGSGSGDS	3.65427
1183	DENV-1/2-NS1	SAGSGSGSGDSGCIV	3.88001
1192	DENV-2-NS1	NKELKCGSGIFITDN	1.50592	NKELKCGSGIFITDN
1194	DENV-2-NS1	KCGSGIFITDNVHTW	1.94386	KCGSGIFITDNVHTW
1214	DENV-2-NS1	ICGIRSVTRLENLMW	1.75118	ICGIRSVTRLENLMW
1221	DENV-2-NS1	WKQITPELNHILSEN	0.942955	WKQITPELNHILSEN
1248	DENV-2-NS1	KMLSTESHNQTFLID	0.652863
1249	DENV-2-NS1	LSTESHNQTFLIDGP	1.03244	LSTESHNQTFLID
1254	DENV-2-NS1	LIDGPETAECPNTNR	1.30814	LIDGPETAECPNTNR
1256	DENV-2-NS1	PETAECPNTNRAWNS	0.437517
1257	DENV-2-NS1	TAECPNTNRAWNSLE	0.471928
1258	DENV-2-NS1	ECPNTNRAWNSLEVE	2.04448
1259	DENV-2-NS1	PNTNRAWNSLEVEDY	3.31428
1260	DENV-2-NS1	TNRAWNSLEVEDYGF	2.00846	TNRAWNS
1262	DENV-2-NS1	WNSLEVEDYGFGVFT	0.302909
1263	DENV-2-NS1	SLEVEDYGFGVFTTN	1.68576
1264	DENV-2-NS1	EVEDYGFGVFTTNIW	1.71192	EVEDYGFGVFT
1268	DENV-2-NS1	VFTTNIWLKLREKQD	0.395927
1269	DENV-2-NS1	TTNIWLKLREKQDVF	0.0240968	TTNIWLKLREKQD
1285	DENV-2-NS1	ADMGYWIESALNDTW	0.453666	ADMGYWIESALNDTW
1287	DENV-2-NS1	YWIESALNDTWKMEK	2.16864	YWIESALNDTWKMEK
1289	DENV-2-NS1	SALNDTWKMEKASFI	3.52791
1290	DENV-2-NS1	LNDTWKMEKASFIEV	1.78289
1291	DENV-2-NS1	DTWKMEKASFIEVKS	2.36308
1292	DENV-2-NS1	WKMEKASFIEVKSCH	1.76079
1293	DENV-2-NS1	MEKASFIEVKSCHWP	5.35582	MEKASFI
1306	DENV-2-NS1	ESEMVIPKNFAGPVS	0.405877	ESEMVIPKNFAGPVS
1309	DENV-2-NS1	PKNFAGPVSQHNYRP	0.147177	PKNFAGPVSQHNYRP
1312	DENV-2-NS1	PVSQHNYRPGYHTQT	3.77421
1313	DENV-2-NS1	SQHNYRPGYHTQTAG	2.0621
1314	DENV-2-NS1	HNYRPGYHTQTAGPW	4.65703
1315	DENV-2-NS1	YRPGYHTQTAGPWHL	4.27922	YRPGYHTQT
1318	DENV-2-NS1	TQTAGPWHLGKLEMD	4.0171	TQTAGPWHLGKLEMD
1344	DENV-2-NS1	RSCTLPPLRYRGEDG	1.55208
1345	DENV-2-NS1	CTLPPLRYRGEDGCW	1.43928	CTLPPLRYRGEDG
1347	DENV-2-NS1	PLRYRGEDGCWYGME	0.276333
1348	DENV-2-NS1	RYRGEDGCWYGMEIR	1.05287	RYRGEDGCWYGME
1360	DENV-2/3-NS1	VNSLVTAGSGSGSGD	0.214642
1372	DENV-3-NS1	KELKCGSGIFVTNEV	1.04968	KELKCGSGIFVTNEV
1375	DENV-3-NS1	SGIFVTNEVHTWTEQ	0.310964
1376	DENV-3-NS1	IFVTNEVHTWTEQYK	0.612356	IFVTNEVHTWTEQ
1379	DENV-3-NS1	VHTWTEQYKFQADSP	3.17896	VHTWTEQYKFQADSP
1393	DENV-3-NS1	GVCGIRSTTRMENLL	2.64167
1394	DENV-3-NS1	CGIRSTTRMENLLWK	3.109
1395	DENV-3-NS1	IRSTTRMENLLWKQI	1.45798
1396	DENV-3-NS1	STTRMENLLWKQIAN	0.522783
1397	DENV-3-NS1	TRMENLLWKQIANEL	3.3202
1398	DENV-3-NS1	MENLLWKQIANELNY	3.88918	MENLL
1401	DENV-3-NS1	KQIANELNYILWENN	0.208502	KQIANELNYILWENN
1415	DENV-3-NS1	LEQGKRTLTPQPMEL	3.32922	LEQGKRTLTPQPMEL
1417	DENV-3-NS1	KRTLTPQPMELKYSW	0.735737
1418	DENV-3-NS1	TLTPQPMELKYSWKT	0.934928	TLTPQPMELKYSW
1421	DENV-3-NS1	MELKYSWKTWGKAKI	4.54394	MELKYSWKTWGKAKI
1426	DENV-3-NS1	GKAKIVTAETQNSSF	7.92535
1427	DENV-3-NS1	AKIVTAETQNSSFII	5.27701
1428	DENV-3-NS1	IVTAETQNSSFIIDG	4.56299
1429	DENV-3-NS1	TAETQNSSFIIDGPN	0.739646
1430	DENV-3-NS1	ETQNSSFIIDGPNTP	2.47888
1431	DENV-3-NS1	QNSSFIIDGPNTPEC	3.85524	QNSSF
1436	DENV-3-NS1	NTPECPSASRAWNVW	0.174925
1437	DENV-3-NS1	PECPSASRAWNVWEV	2.12964
1438	DENV-3-NS1	CPSASRAWNVWEVED	4.02712
1439	DENV-3-NS1	SASRAWNVWEVEDYG	0.739955	SASRAWNVW
1441	DENV-3-NS1	AWNVWEVEDYGFGVF	0.771099
1442	DENV-3-NS1	NVWEVEDYGFGVFTT	2.53875
1443	DENV-3-NS1	WEVEDYGFGVFTTNI	3.40463
1444	DENV-3-NS1	VEDYGFGVFTTNIWL	4.92738	VEDYGFGVF
1447	DENV-3-NS1	GVFTTNIWLKLREVY	0.758373
1448	DENV-3-NS1	FTTNIWLKLREVYTQ	0.00712312
1449	DENV-3-NS1	TNIWLKLREVYTQLC	1.14872
1450	DENV-3-NS1	IWLKLREVYTQLCDH	0.434928
1451	DENV-3-NS1	LKLREVYTQLCDHRL	1.68576	LKLREVY
1485	DENV-3-NS1	LESDMIIPKSLAGPI	1.09209	LESDMIIPKSLAGPI
1487	DENV-3-NS1	MIIPKSLAGPISQHN	0.793857	MIIPKSLAGPISQHN
1490	DENV-3-NS1	LAGPISQHNHRPGYH	0.375606	LAGPISQHNHRPGYH
1492	DENV-3-NS1	ISQHNHRPGYHTQTA	4.50811
1493	DENV-3-NS1	QHNHRPGYHTQTAGP	1.53451
1494	DENV-3-NS1	NHRPGYHTQTAGPWH	1.27196
1495	DENV-3-NS1	RPGYHTQTAGPWHLG	1.4325	RPGYHTQTA
1515	DENV-3-NS1	SLRTTTVSGKLIHEW	0.354696	SLRTTTVSGKLIHEW
1531	DENV-3-NS1	CWYGMEIRPISEKEE	2.05102	CWYGMEIRPISEKEE
1533	DENV-3-NS1	MEIRPISEKEENMVK	2.65178	MEIRPISEKEENMVK
1535	DENV-3-NS1	PISEKEENMVKSLVS	0.833161	PISEKEENMVKSLVS
1551	DENV-4-NS1	GRELKCGSGIFVVDN	2.74197
1552	DENV-4-NS1	ELKCGSGIFVVDNVH	0.827556
1553	DENV-4-NS1	KCGSGIFVVDNVHTW	2.17164	KCGSGIFVVDN
1555	DENV-4-NS1	GIFVVDNVHTWTEQY	2.37922	GIFVVDNVHTWTEQY
1560	DENV-4-NS1	WTEQYKFQPESPARL	3.19248	WTEQYKFQPESPARL
1581	DENV-4-NS1	QITNELNYVLWEGGH	0.264618
1582	DENV-4-NS1	TNELNYVLWEGGHDL	0.174925
1583	DENV-4-NS1	ELNYVLWEGGHDLTV	0.365227	ELNYVLWEGGH
1587	DENV-4-NS1	GGHDLTVVAGDVKGV	1.88964	GGHDLTVVAGDVKGV
1606	DENV-4-NS1	KAKIFTPEARNSTFL	2.90533	KAKIFTPEARNSTFL
1613	DENV-4-NS1	LIDGPDTSECPNERR	1.70564
1614	DENV-4-NS1	DGPDTSECPNERRAW	0.980889
1615	DENV-4-NS1	PDTSECPNERRAWNS	0.572745
1616	DENV-4-NS1	TSECPNERRAWNSFE	1.52962
1617	DENV-4-NS1	ECPNERRAWNSFEVE	2.99295
1618	DENV-4-NS1	PNERRAWNSFEVEDY	1.30983
1619	DENV-4-NS1	ERRAWNSFEVEDYGF	0.102987	ERR
1621	DENV-4-NS1	WNSFEVEDYGFGMFT	0.581465
1622	DENV-4-NS1	SFEVEDYGFGMFTTN	1.60617
1623	DENV-4-NS1	EVEDYGFGMFTTNIW	2.74064	EVEDYGFGMFT
1646	DENV-4-NS1	YWIESSKNQTWQIER	0.0240968	YWIESSKNQTWQIER
1649	DENV-4-NS1	KNQTWQIERASLIEV	0.930167
1650	DENV-4-NS1	QTWQIERASLIEVKT	1.38837	QTWQIERASLIEV
1660	DENV-4-NS1	THTLWSNGVLESQML	0.118319	THTLWSNGVLESQML
1666	DENV-4-NS1	QMLIPKSYAGPFSQH	0.556891	QMLIPKSYAGPFSQH
1668	DENV-4-NS1	PKSYAGPFSQHNYRQ	0.147177	PKSYAGPFSQHNYRQ
1671	DENV-4-NS1	PFSQHNYRQGYATQT	2.04714	PFSQHNYRQGYATQT
1673	DENV-4-NS1	HNYRQGYATQTVGPW	3.48586
1674	DENV-4-NS1	YRQGYATQTVGPWHL	1.70273	YRQGYATQTVGPW
1677	DENV-4-NS1	TQTVGPWHLGKLEID	3.28192	TQTVGPWHLGKLEID
1698	DENV-4-NS1	SGKLVTQWCCRSCTM	2.03157
1699	DENV-4-NS1	KLVTQWCCRSCTMPP	3.75941
1700	DENV-4-NS1	VTQWCCRSCTMPPLR	4.27059
1701	DENV-4-NS1	QWCCRSCTMPPLRFL	3.45396
1702	DENV-4-NS1	CCRSCTMPPLRFLGE	3.37109
1703	DENV-4-NS1	RSCTMPPLRFLGEDG	2.78162	RSCTM
1706	DENV-4-NS1	PLRFLGEDGCWYGME	0.802901
1707	DENV-4-NS1	RFLGEDGCWYGMEIR	0.85998
1708	DENV-4-NS1	LGEDGCWYGMEIRPL	1.2614	LGEDGCWYGME
1710	DENV-4-NS1	GCWYGMEIRPLSEKE	0.816578	GCWYGMEIRPLSEKE
1719	DENV-4-ZIKV-NS1	VKSQVTAGSGSGSGD	0.26441
1720	DENV-4-ZIKV-NS1	SQVTAGSGSGSGDVG	0.782222
1730	ZIKV-NS1	SKKETRCGTGVFVYN	2.43247	SKKETRCGTGVFVYN
1732	ZIKV-NS1	TRCGTGVFVYNDVEA	0.234071
1733	ZIKV-NS1	CGTGVFVYNDVEAWR	1.54001
1734	ZIKV-NS1	TGVFVYNDVEAWRDR	1.96958
1735	ZIKV-NS1	VFVYNDVEAWRDRYK	3.03167
1736	ZIKV-NS1	VYNDVEAWRDRYKYH	1.9436
1737	ZIKV-NS1	NDVEAWRDRYKYHPD	0.943406	NDVEA
1739	ZIKV-NS1	AWRDRYKYHPDSPRR	0.056891	AWRDRYKYHPDSPRR
1745	ZIKV-NS1	PRRLAAAVKQAWEDG	0.132893
1746	ZIKV-NS1	RLAAAVKQAWEDGIC	0.675718	RLAAAVKQAWEDG
1753	ZIKV-NS1	CGISSVSRMENIMWR	3.43873
1755	ZIKV-NS1	SVSRMENIMWRSVEG	1.06089
1756	ZIKV-NS1	SRMENIMWRSVEGEL	2.33209
1757	ZIKV-NS1	MENIMWRSVEGELNA	4.86106	MENIMWR
1759	ZIKV-NS1	MWRSVEGELNAILEE	0.54068
1760	ZIKV-NS1	RSVEGELNAILEENG	1.1004	RSVEGELNAILEE
1762	ZIKV-NS1	GELNAILEENGVQLT	0.201644
1763	ZIKV-NS1	LNAILEENGVQLTVV	0.188408	LNAILEENGVQLT
1773	ZIKV-NS1	NPMWRGPQRLPVPVN	2.02162
1774	ZIKV-NS1	MWRGPQRLPVPVNEL	5.95817
1775	ZIKV-NS1	RGPQRLPVPVNELPH	4.78724
1776	ZIKV-NS1	PQRLPVPVNELPHGW	0.444358
1777	ZIKV-NS1	RLPVPVNELPHGWKA	1.00282
1778	ZIKV-NS1	PVPVNELPHGWKAWG	2.39727
1779	ZIKV-NS1	PVNELPHGWKAWGKS	2.12562	PVN
1785	ZIKV-NS1	GKSYFVRAAKTNNSF	1.42281	GKSYFVRAAKTNNSF
1787	ZIKV-NS1	FVRAAKTNNSFVVDG	1.38047	FVRAAKTNNSFVVDG
1790	ZIKV-NS1	TNNSFVVDGDTLKEC	1.36586	TNNSFVVDGDTLKEC
1796	ZIKV-NS1	KECPLKHRAWNSFLV	3.417
1797	ZIKV-NS1	CPLKHRAWNSFLVED	0.668662
1798	ZIKV-NS1	LKHRAWNSFLVEDHG	3.40114
1799	ZIKV-NS1	HRAWNSFLVEDHGFG	2.85472
1800	ZIKV-NS1	AWNSFLVEDHGFGVF	3.00035
1801	ZIKV-NS1	NSFLVEDHGFGVFHT	1.12052
1802	ZIKV-NS1	FLVEDHGFGVFHTSV	3.18528	FVL
1803	ZIKV-NS1	VEDHGFGVFHTSVWL	5.54786	VEDHGFGVFHTSVWL
1806	ZIKV-NS1	GVFHTSVWLKVREDY	0.24767	GVFHTSVWLKVREDY
1824	ZIKV-NS1	DLGYWIESEKNDTWR	1.76571	DLGYWIESEKNDTWR
1841	ZIKV-NS1	LWTDGIEESDLIIPK	0.435745	LWTDGIEESDLIIPK
1856	ZIKV-NS1	RTQMKGPWHSEELEI	0.805307
1857	ZIKV-NS1	QMKGPWHSEELEIRF	1.05689
1858	ZIKV-NS1	KGPWHSEELEIRFEE	0.459919	KGPWHSEELEI
1864	ZIKV-NS1	FEECPGTKVHVEETC	0.415691	FEECPGTKVHVEETC
1867	ZIKV-NS1	TKVHVEETCGTRGPS	0.507123	TKVHVEETCGTRGPS
1873	ZIKV-NS1	GPSLRSTTASGRVIE	0.822369
1874	ZIKV-NS1	SLRSTTASGRVIEEW	0.310964
1875	ZIKV-NS1	RSTTASGRVIEEWCC	0.385838	RSTTASGRVIE
1878	ZIKV-NS1	GRVIEEWCCRECTMP	0.681698
1879	ZIKV-NS1	VIEEWCCRECTMPPL	3.61288
1880	ZIKV-NS1	EEWCCRECTMPPLSF	4.72785
1881	ZIKV-NS1	WCCRECTMPPLSFRA	3.57532
1882	ZIKV-NS1	CRECTMPPLSFRAKD	2.83331
1883	ZIKV-NS1	ECTMPPLSFRAKDGC	0.793857
1884	ZIKV-NS1	TMPPLSFRAKDGCWY	5.1226	TMP
1891	ZIKV-NS1	YGMEIRPRKEPESNL	1.99229
1892	ZIKV-NS1	MEIRPRKEPESNLVR	4.2347	MEIRPRKEPESNL
1894	ZIKV-NS1	PRKEPESNLVRSMVT	4.57009
1895	ZIKV-NS1	KEPESNLVRSMVTAG	3.1781	KEPESNLVRSMVT
1896	ZIKV-NS1	PESNLVRSMVTAGSG	4.02634
1897	ZIKV-NS1	SNLVRSMVTAGSGSG	3.39217
1898	ZIKV-NS1	LVRSMVTAGSGSGSG	2.82768

## Sheet: Z4-Z5
Peptide code	Virus-Protein	Peptides sequence	Intensity	Epitopes sequence	Virus-Protein	Peptides	Epitopes
3	DENV-1-E	GSGMRCVGIGNRDFV	0.0565948		DENV-1-E	36	18
5	DENV-1-E	RCVGIGNRDFVEGLS	2.25281	RCVGIGNRDFVEGLS	DENV-2-E	55	21
7	DENV-1-E	IGNRDFVEGLSGATW	0.286642		DENV-3-E	36	20
8	DENV-1-E	NRDFVEGLSGATWVD	0.96677	NRDFVEGLSGATW	DENV-4-E	41	20
10	DENV-1-E	VEGLSGATWVDVVLE	0.367461		ZIKV-E	34	17
11	DENV-1-E	GLSGATWVDVVLEHG	0.569816	GLSGATWVDVVLE	DENV-1-NS1	35	23
19	DENV-1-E	CVTTMAKNKPTLDIE	2.31792		DENV-2-NS1	31	18
20	DENV-1-E	TTMAKNKPTLDIELL	2.29546		DENV-3-NS1	37	19
21	DENV-1-E	MAKNKPTLDIELLKT	1.98875		DENV-4-NS1	39	14
22	DENV-1-E	KNKPTLDIELLKTEV	0.777317		ZIKV-NS1	39	17
23	DENV-1-E	KPTLDIELLKTEVTN	3.22275	KPTLDIE	TOTAL	383	187
25	DENV-1-E	DIELLKTEVTNPAVL	2.61742	DIELLKTEVTNPAVL
28	DENV-1-E	TEVTNPAVLRKLCIE	0.658958	TEVTNPAVLRKLCIE
45	DENV-1-E	LVEEQDANFVCRRTF	0.300383
46	DENV-1-E	EEQDANFVCRRTFVD	1.38622	EEQDANFVCRRTF
51	DENV-1-E	RTFVDRGWGNGCGLF	1.97245	RTFVDRGWGNGCGLF
67	DENV-1-E	EGKIVQYENLKYSVI	0.934097	EGKIVQYENLKYSVI
89	DENV-1-E	TSEIQLTDYGALTLD	1.9449	TSEIQLTDYGALTLD
93	DENV-1-E	YGALTLDCSPRTGLD	0.272635
94	DENV-1-E	ALTLDCSPRTGLDFN	1.99268
95	DENV-1-E	TLDCSPRTGLDFNEM	1.87214
96	DENV-1-E	DCSPRTGLDFNEMVL	0.286912
97	DENV-1-E	SPRTGLDFNEMVLLT	2.88005	SPRTGLD
105	DENV-1-E	KEKSWLVHKQWFLDL	0.12476
106	DENV-1-E	KSWLVHKQWFLDLPL	1.48137	KSWLVHKQWFLDL
115	DENV-1-E	SGASTSQETWNRQDL	1.93636
116	DENV-1-E	ASTSQETWNRQDLLV	1.8284
117	DENV-1-E	TSQETWNRQDLLVTF	2.35898	TSQETWNRQDL
158	DENV-1-E	LEKEVAETQHGTVLV	1.02659	LEKEVAETQHGTVLV
168	DENV-1-E	GTDAPCKIPFSTQDE	1.89857	GTDAPCKIPFSTQDE
181	DENV-1-E	ANPIVTDKEKPVNIE	0.133961	ANPIVTDKEKPVNIE
185	DENV-1-E	EKPVNIETEPPFGES	1.73077
186	DENV-1-E	PVNIETEPPFGESYI	1.65391
187	DENV-1-E	NIETEPPFGESYIVV	2.41847
188	DENV-1-E	ETEPPFGESYIVVGA	0.174289	ETEPPFGES
193	DENV-1-E	IVVGAGEKALKLSWF	1.05778	IVVGAGEKALKLSWF
202	DENV-2-E	GSGSGMRCIGISNRD	0.182349
203	DENV-2-E	GSGMRCIGISNRDFV	2.21456
204	DENV-2-E	GMRCIGISNRDFVEG	1.97007
205	DENV-2-E	RCIGISNRDFVEGVS	1.39926	RCIGISNRDFVEGVS
207	DENV-2-E	ISNRDFVEGVSGGSW	0.546007
208	DENV-2-E	NRDFVEGVSGGSWVD	1.37951
209	DENV-2-E	DFVEGVSGGSWVDIV	0.751101	DFVEGVSGGSW
211	DENV-2-E	GVSGGSWVDIVLEHG	1.28768	GVSGGSWVDIVLEHG
219	DENV-2-E	CVTTMAKNKPTLDFE	1.24741
220	DENV-2-E	TTMAKNKPTLDFELI	2.00122
221	DENV-2-E	MAKNKPTLDFELIKT	1.99067
222	DENV-2-E	KNKPTLDFELIKTEA	0.0286119	KNKPTLDFE
228	DENV-2-E	TEAKQPATLRKYCIE	0.569816	TEAKQPATLRKYCIE
237	DENV-2-E	TNTTTESRCPTQGEP	0.45862	TNTTTESRCPTQGEP
239	DENV-2-E	TESRCPTQGEPSLNE	4.17776
240	DENV-2-E	SRCPTQGEPSLNEEQ	3.73572
241	DENV-2-E	CPTQGEPSLNEEQDK	2.06726
242	DENV-2-E	TQGEPSLNEEQDKRF	3.54414
243	DENV-2-E	GEPSLNEEQDKRFIC	0.766148	GEPSLNE
251	DENV-2-E	HSMVDRGWGNGCGLF	0.870022	HSMVDRGWGNGCGLF
266	DENV-2-E	NMEGKIVQPENLEYT	0.495893
267	DENV-2-E	EGKIVQPENLEYTIV	3.65506	EGKIVQPENLEYT
269	DENV-2-E	VQPENLEYTIVITPH	0.19032	VQPENLEYTIVITPH
294	DENV-2-E	TVTMECSPRTGLDFN	1.24815
295	DENV-2-E	TMECSPRTGLDFNEM	0.832137
296	DENV-2-E	ECSPRTGLDFNEMVL	1.64492
297	DENV-2-E	SPRTGLDFNEMVLLQ	3.20948
298	DENV-2-E	RTGLDFNEMVLLQME	1.71594
299	DENV-2-E	GLDFNEMVLLQMEDK	0.682349
300	DENV-2-E	DFNEMVLLQMEDKAW	0.430765	DFN
301	DENV-2-E	NEMVLLQMEDKAWLV	0.958162	NEMVLLQMEDKAWLV
303	DENV-2-E	LLQMEDKAWLVHRQW	0.723498
304	DENV-2-E	QMEDKAWLVHRQWFL	0.307156
305	DENV-2-E	EDKAWLVHRQWFLDL	1.62072
306	DENV-2-E	KAWLVHRQWFLDLPL	2.71653
307	DENV-2-E	WLVHRQWFLDLPLPW	0.869768
308	DENV-2-E	VHRQWFLDLPLPWLP	3.81482	VHRQW
310	DENV-2-E	WFLDLPLPWLPGADT	0.750379	WFLDLPLPWLPGADT
313	DENV-2-E	LPWLPGADTQGSNWI	1.12267	LPWLPGADTQGSNWI
316	DENV-2-E	ADTQGSNWIQKETLV	0.870039
317	DENV-2-E	TQGSNWIQKETLVTF	0.350993	TQGSNWIQKETLV
358	DENV-2-E	IVKEIAETQHGTIVI	1.89674	IVKEIAETQHGTIVI
366	DENV-2-E	VQYEGDGSPCKIPFE	1.61468
367	DENV-2-E	YEGDGSPCKIPFEIT	3.5219
368	DENV-2-E	GDGSPCKIPFEITDL	3.17159
369	DENV-2-E	GSPCKIPFEITDLEK	0.200668
370	DENV-2-E	PCKIPFEITDLEKRH	2.26285
371	DENV-2-E	KIPFEITDLEKRHVL	1.33484	KIPFE
381	DENV-2-E	VNPIVTEKDSPVNIE	0.694303	VNPIVTEKDSPVNIE
384	DENV-2-E	EKDSPVNIEAEPPFG	1.59119
385	DENV-2-E	DSPVNIEAEPPFGDS	0.95862
386	DENV-2-E	PVNIEAEPPFGDSYI	1.98416
387	DENV-2-E	NIEAEPPFGDSYIIV	1.45545
388	DENV-2-E	EAEPPFGDSYIIVGV	0.72135	EAEPPFG
393	DENV-2-E	IIVGVEPGQLKLNWF	1.46342	IIVGVEPGQLKLNWF
404	DENV-3-E	GMRCVGVGNRDFVEG	0.509596
405	DENV-3-E	RCVGVGNRDFVEGLS	0.151028	RCVGVGNRDFVEGLS
407	DENV-3-E	VGNRDFVEGLSGATW	0.123942
408	DENV-3-E	NRDFVEGLSGATWVD	0.821777	NRDFVEGLSGATW
411	DENV-3-E	GLSGATWVDVVLEHG	0.61563	GLSGATWVDVVLEHG
419	DENV-3-E	CVTTMAKNKPTLDIE	1.7491
420	DENV-3-E	TTMAKNKPTLDIELQ	3.00649	TTMAKNKPTLDIE
428	DENV-3-E	TEATQLATLRKLCIE	0.383831	TEATQLATLRKLCIE
442	DENV-3-E	TQGEAVLPEEQDQNY	0.286742
443	DENV-3-E	GEAVLPEEQDQNYVC	0.269232	GEAVLPEEQDQNY
451	DENV-3-E	HTYVDRGWGNGCGLF	1.60283	HTYVDRGWGNGCGLF
460	DENV-3-E	SLVTCAKFQCLEPIE	2.16206	SLVTCAKFQCLEPIE
467	DENV-3-E	EGKVVQYENLKYTVI	0.685471	EGKVVQYENLKYTVI
488	DENV-3-E	TTEAILPEYGTLGLE	2.5019	TTEAILPEYGTLGLE
492	DENV-3-E	YGTLGLECSPRTGLD	0.00106399
493	DENV-3-E	TLGLECSPRTGLDFN	2.23528
494	DENV-3-E	GLECSPRTGLDFNEM	0.727387
495	DENV-3-E	ECSPRTGLDFNEMIL	1.40959
496	DENV-3-E	SPRTGLDFNEMILLT	3.63963	SPRTGLD
504	DENV-3-E	KNKAWMVHRQWFFDL	0.817197
505	DENV-3-E	KAWMVHRQWFFDLPL	2.25894
506	DENV-3-E	WMVHRQWFFDLPLPW	1.027	WMVHRQWFFDL
512	DENV-3-E	LPWTSGATAETPTWN	1.76304	LPWTSGATAETPTWN
515	DENV-3-E	ATAETPTWNRKELLV	3.05334
516	DENV-3-E	AETPTWNRKELLVTF	1.78061	AETPTWNRKELLV
557	DENV-3-E	LKKEVSETQHGTILI	1.52509	LKKEVSETQHGTILI
559	DENV-3-E	VSETQHGTILIKVEY	0.550832	VSETQHGTILIKVEY
567	DENV-3-E	GEDAPCKIPFSTEDG	0.265528	GEDAPCKIPFSTEDG
580	DENV-3-E	ANPVVTKKEEPVNIE	2.16377	ANPVVTKKEEPVNIE
583	DENV-3-E	KKEEPVNIEAEPPFG	1.79974
584	DENV-3-E	EEPVNIEAEPPFGES	0.813866
585	DENV-3-E	PVNIEAEPPFGESNI	2.42043
586	DENV-3-E	NIEAEPPFGESNIVI	2.96622
587	DENV-3-E	EAEPPFGESNIVIGI	0.855557
588	DENV-3-E	EPPFGESNIVIGIGD	1.8245	EPPFG
592	DENV-3-E	IVIGIGDNALKINWY	1.55183	IVIGIGDNALKINWY
606	DENV-4-E	VGNRDFVEGVSGGAW	0.272635
607	DENV-4-E	NRDFVEGVSGGAWVD	1.44358
608	DENV-4-E	DFVEGVSGGAWVDLV	1.48584
609	DENV-4-E	VEGVSGGAWVDLVLE	0.464357
610	DENV-4-E	GVSGGAWVDLVLEHG	1.24757
611	DENV-4-E	SGGAWVDLVLEHGGC	0.3401	SGGAW
618	DENV-4-E	CVTTMAQGKPTLDFE	1.02153
619	DENV-4-E	TTMAQGKPTLDFELT	3.27024
620	DENV-4-E	MAQGKPTLDFELTKT	2.04769	MAQGKPTLDFE
630	DENV-4-E	ALLRTYCIEALISNI	0.959684	ALLRTYCIEALISNI
637	DENV-4-E	ITTATRCPTQGEPYL	1.20753	ITTATRCPTQGEPYL
642	DENV-4-E	GEPYLKEEQDQQYIC	1.02389	GEPYLKEEQDQQYIC
644	DENV-4-E	LKEEQDQQYICRRDV	1.22819
645	DENV-4-E	EEQDQQYICRRDVVD	1.71997	EEQDQQYICRRDV
647	DENV-4-E	QQYICRRDVVDRGWG	0.365532	QQYICRRDVVDRGWG
650	DENV-4-E	RDVVDRGWGNGCGLF	0.72135	RDVVDRGWGNGCGLF
664	DENV-4-E	SGKITGNLVQIENLE	2.15958
665	DENV-4-E	KITGNLVQIENLEYT	1.51027
666	DENV-4-E	TGNLVQIENLEYTVV	2.69844	TGNLVQIENLE
682	DENV-4-E	HGVTATITPRSPSVE	2.6561	HGVTATITPRSPSVE
685	DENV-4-E	ITPRSPSVEVKLPDY	2.50872
686	DENV-4-E	PRSPSVEVKLPDYGE	0.149555
687	DENV-4-E	SPSVEVKLPDYGELT	2.22534
688	DENV-4-E	SVEVKLPDYGELTLD	0.338043	SVEVKLPDY
690	DENV-4-E	KLPDYGELTLDCEPR	1.16801	KLPDYGELTLDCEPR
693	DENV-4-E	ELTLDCEPRSGIDFN	2.32533
694	DENV-4-E	TLDCEPRSGIDFNEM	0.0411492
695	DENV-4-E	DCEPRSGIDFNEMIL	0.0210522	DCEPRSGIDFN
704	DENV-4-E	KKKTWLVHKQWFLDL	0.247818
705	DENV-4-E	KTWLVHKQWFLDLPL	2.8254	KTWLVHKQWFLDL
707	DENV-4-E	VHKQWFLDLPLPWTT	0.160148	VHKQWFLDLPLPWTT
712	DENV-4-E	LPWTTGADTSEVHWN	0.464064	LPWTTGADTSEVHWN
766	DENV-4-E	YEGAGAPCKVPIEIR	1.8829
767	DENV-4-E	GAGAPCKVPIEIRDV	2.03014	GAGAPCKVPIEIR
781	DENV-4-E	PLAENTNSVTNIELE	0.278243
782	DENV-4-E	AENTNSVTNIELEPP	0.021385
783	DENV-4-E	NTNSVTNIELEPPFG	2.83342
784	DENV-4-E	NSVTNIELEPPFGDS	1.73866	NSVTNIELE
786	DENV-4-E	NIELEPPFGDSYIVI	2.38126
787	DENV-4-E	ELEPPFGDSYIVIGV	0.732675	ELEPPFGDSYIVI
792	DENV-4-E	IVIGVGNSALTLHWF	2.05375	IVIGVGNSALTLHWF
802	ZIKV-E	GSGMRCIGVSNRDFV	0.526377
803	ZIKV-E	GMRCIGVSNRDFVEG	1.259
807	ZIKV-E	NRDFVEGMSGGTWVD	0.201616	NRDFVEGMSGGTWVD
810	ZIKV-E	GMSGGTWVDVVLEHG	0.588313	GMSGGTWVDVVLEHG
819	ZIKV-E	TVMAQDKPTVDIELV	1.26096	TVMAQDKPTVDIELV
840	ZIKV-E	CPTQGEAYLDKQSDT	0.0698158
841	ZIKV-E	TQGEAYLDKQSDTQY	1.48624	TQGEAYLDKQSDT
850	ZIKV-E	RTLVDRGWGNGCGLF	0.327102	RTLVDRGWGNGCGLF
865	ZIKV-E	KMTGKSIQPENLEYR	0.011296
866	ZIKV-E	TGKSIQPENLEYRIM	3.33826
867	ZIKV-E	KSIQPENLEYRIMLS	2.32535	KSIQPENLEYR
868	ZIKV-E	IQPENLEYRIMLSVH	0.90091	IQPENLEYRIMLSVH
888	ZIKV-E	TPNSPRAEATLGGFG	0.213717	TPNSPRAEATLGGFG
891	ZIKV-E	AEATLGGFGSLGLDC	0.592864	AEATLGGFGSLGLDC
895	ZIKV-E	GSLGLDCEPRTGLDF	0.609413	GSLGLDCEPRTGLDF
898	ZIKV-E	CEPRTGLDFSDLYYL	1.60975
899	ZIKV-E	PRTGLDFSDLYYLTM	0.165971
900	ZIKV-E	TGLDFSDLYYLTMNN	2.80307
901	ZIKV-E	LDFSDLYYLTMNNKH	0.383831	LDFSDLYYL
905	ZIKV-E	LTMNNKHWLVHKEWF	0.792841
906	ZIKV-E	MNNKHWLVHKEWFHD	2.04207
907	ZIKV-E	NKHWLVHKEWFHDIP	2.16785
908	ZIKV-E	HWLVHKEWFHDIPLP	5.21262
909	ZIKV-E	LVHKEWFHDIPLPWH	1.73892	LVHKEWF
911	ZIKV-E	EWFHDIPLPWHAGAD	1.63023	EWFHDIPLPWHAGAD
914	ZIKV-E	PLPWHAGADTGTPHW	0.961048	PLPWHAGADTGTPHW
918	ZIKV-E	DTGTPHWNNKEALVE	0.442036
919	ZIKV-E	GTPHWNNKEALVEFK	0.671127	GTPHWNNKEALVE
921	ZIKV-E	WNNKEALVEFKDAHA	0.0394414	WNNKEALVEFKDAHA
987	ZIKV-E	STENSKMMLELDPPF	1.33814
988	ZIKV-E	ENSKMMLELDPPFGD	1.88609
989	ZIKV-E	SKMMLELDPPFGDSY	1.88627
990	ZIKV-E	MMLELDPPFGDSYIV	3.01689
991	ZIKV-E	LELDPPFGDSYIVIG	1.93813	LELDPPF
1007	DENV-1-NS1	SGDSGCVINWKGREL	1.92235
1026	DENV-1-NS1	DSPKRLSAAIGKAWE	0.546007	DSPKRLSAAIGKAWE
1033	DENV-1-NS1	EEGVCGIRSATRLEN	0.206002	EEGVCGIRSATRLEN
1038	DENV-1-NS1	TRLENIMWKQISNEL	0.662028	TRLENIMWKQISNEL
1040	DENV-1-NS1	NIMWKQISNELNHIL	0.481919	NIMWKQISNELNHIL
1042	DENV-1-NS1	KQISNELNHILLEND	0.12439	KQISNELNHILLEND
1044	DENV-1-NS1	NELNHILLENDMKFT	0.272635
1045	DENV-1-NS1	LNHILLENDMKFTVV	1.70561	LNHILLENDMKFT
1049	DENV-1-NS1	DMKFTVVVGDANGIL	0.625995	DMKFTVVVGDANGIL
1067	DENV-1-NS1	GKAKIIGADIQNTTF	0.558121
1068	DENV-1-NS1	AKIIGADIQNTTFII	2.44987	AKIIGADIQNTTF
1070	DENV-1-NS1	GADIQNTTFIIDGPD	0.112074	GADIQNTTFIIDGPD
1076	DENV-1-NS1	GPDTPECPDGQRAWN	0.377744
1077	DENV-1-NS1	DTPECPDGQRAWNIW	0.880794
1078	DENV-1-NS1	PECPDGQRAWNIWEV	2.92961
1079	DENV-1-NS1	CPDGQRAWNIWEVED	1.5418
1080	DENV-1-NS1	DGQRAWNIWEVEDYG	1.78259	DGQRAWN
1082	DENV-1-NS1	AWNIWEVEDYGFGVF	0.651592
1083	DENV-1-NS1	NIWEVEDYGFGVFTT	2.44051
1084	DENV-1-NS1	WEVEDYGFGVFTTNI	0.586407
1085	DENV-1-NS1	VEDYGFGVFTTNIWL	1.47645	VEDYGFGVF
1088	DENV-1-NS1	GVFTTNIWLKLRDSY	1.35065	GVFTTNIWLKLRDSY
1091	DENV-1-NS1	IWLKLRDSYTQMCDH	0.964064	IWLKLRDSYTQMCDH
1101	DENV-1-NS1	AIKDSKAVHADMGYW	0.174289
1102	DENV-1-NS1	KDSKAVHADMGYWIE	2.31478	KDSKAVHADMGYW
1110	DENV-1-NS1	EKNETWKLARASFIE	2.73548	EKNETWKLARASFIE
1122	DENV-1-NS1	HTLWSNGVLESEMII	0.0198973	HTLWSNGVLESEMII
1131	DENV-1-NS1	FGGPISQHNYRPGYF	1.45941	FGGPISQHNYRPGYF
1139	DENV-1-NS1	QTAGPWHLGKLELDF	0.652879
1140	DENV-1-NS1	AGPWHLGKLELDFDL	0.118112	AGPWHLGKLELDF
1144	DENV-1-NS1	LELDFDLCEGTTVVV	0.526377	LELDFDLCEGTTVVV
1150	DENV-1-NS1	VVVDEHCGNRGPSLR	0.707287	VVVDEHCGNRGPSLR
1156	DENV-1-NS1	SLRTTTVTGKIIHEW	1.70485	SLRTTTVTGKIIHEW
1160	DENV-1-NS1	GKIIHEWCCRSCTLP	2.00901	GKIIHEWCCRSCTLP
1168	DENV-1-NS1	LRFRGEDGCWYGMEI	0.383831	LRFRGEDGCWYGMEI
1193	DENV-2-NS1	ELKCGSGIFITDNVH	0.45862	ELKCGSGIFITDNVH
1195	DENV-2-NS1	GSGIFITDNVHTWTE	0.565116
1196	DENV-2-NS1	GIFITDNVHTWTEQY	1.70405	GIFITDNVHTWTE
1214	DENV-2-NS1	ICGIRSVTRLENLMW	1.665	ICGIRSVTRLENLMW
1218	DENV-2-NS1	RLENLMWKQITPELN	2.79213
1219	DENV-2-NS1	ENLMWKQITPELNHI	0.516358
1220	DENV-2-NS1	LMWKQITPELNHILS	0.265528
1221	DENV-2-NS1	WKQITPELNHILSEN	0.682349	WKQITPELN
1248	DENV-2-NS1	KMLSTESHNQTFLID	2.3196
1249	DENV-2-NS1	LSTESHNQTFLIDGP	1.75227
1250	DENV-2-NS1	TESHNQTFLIDGPET	0.286642	TESHNQTFLID
1257	DENV-2-NS1	TAECPNTNRAWNSLE	0.401791
1258	DENV-2-NS1	ECPNTNRAWNSLEVE	0.930765
1259	DENV-2-NS1	PNTNRAWNSLEVEDY	2.12955
1260	DENV-2-NS1	TNRAWNSLEVEDYGF	1.84849	TNRAWNSLE
1263	DENV-2-NS1	SLEVEDYGFGVFTTN	2.31937
1264	DENV-2-NS1	EVEDYGFGVFTTNIW	2.09279	EVEDYGFGVFTTNIW
1269	DENV-2-NS1	TTNIWLKLREKQDVF	1.42711	TTNIWLKLREKQDVF
1282	DENV-2-NS1	DNRAVHADMGYWIES	0.740088	DNRAVHADMGYWIES
1284	DENV-2-NS1	VHADMGYWIESALND	3.20607
1285	DENV-2-NS1	ADMGYWIESALNDTW	3.02386	ADMGYWIESALND
1287	DENV-2-NS1	YWIESALNDTWKMEK	0.0313348	YWIESALNDTWKMEK
1290	DENV-2-NS1	LNDTWKMEKASFIEV	3.24974	LNDTWKMEKASFIEV
1299	DENV-2-NS1	HWPKSHTLWSNGVLE	0.506198	HWPKSHTLWSNGVLE
1310	DENV-2-NS1	NFAGPVSQHNYRPGY	0.365413	NFAGPVSQHNYRPGY
1319	DENV-2-NS1	TAGPWHLGKLEMDFD	1.54489
1320	DENV-2-NS1	GPWHLGKLEMDFDFC	2.22635
1321	DENV-2-NS1	WHLGKLEMDFDFCEG	0.793989	WHLGKLEMDFDFCEG
1325	DENV-2-NS1	DFDFCEGTTVVVTED	3.17369	DFDFCEGTTVVVTED
1345	DENV-2-NS1	CTLPPLRYRGEDGCW	1.90167	CTLPPLRYRGEDGCW
1348	DENV-2-NS1	RYRGEDGCWYGMEIR	1.72447	RYRGEDGCWYGMEIR
1374	DENV-3-NS1	CGSGIFVTNEVHTWT	0.346512
1375	DENV-3-NS1	SGIFVTNEVHTWTEQ	0.365413	SGIFVTNEVHTWT
1377	DENV-3-NS1	VTNEVHTWTEQYKFQ	0.0603862	VTNEVHTWTEQYKFQ
1385	DENV-3-NS1	DSPKRLATAIAGAWE	1.26639	DSPKRLATAIAGAWE
1397	DENV-3-NS1	TRMENLLWKQIANEL	0.45862
1398	DENV-3-NS1	MENLLWKQIANELNY	2.16131	MENLLWKQIANEL
1401	DENV-3-NS1	KQIANELNYILWENN	1.7622	KQIANELNYILWENN
1404	DENV-3-NS1	LNYILWENNIKLTVV	0.0698158	LNYILWENNIKLTVV
1406	DENV-3-NS1	LWENNIKLTVVVGDI	1.14984
1407	DENV-3-NS1	ENNIKLTVVVGDIIG	0.936197
1408	DENV-3-NS1	NIKLTVVVGDIIGVL	1.2044
1409	DENV-3-NS1	KLTVVVGDIIGVLEQ	2.1407	KLTVVVGDI
1428	DENV-3-NS1	IVTAETQNSSFIIDG	1.59537	IVTAETQNSSFIIDG
1436	DENV-3-NS1	NTPECPSASRAWNVW	0.346512
1437	DENV-3-NS1	PECPSASRAWNVWEV	2.67759
1438	DENV-3-NS1	CPSASRAWNVWEVED	1.88657
1439	DENV-3-NS1	SASRAWNVWEVEDYG	2.37802	SASRAWNVW
1442	DENV-3-NS1	NVWEVEDYGFGVFTT	1.67189
1443	DENV-3-NS1	WEVEDYGFGVFTTNI	1.98449
1444	DENV-3-NS1	VEDYGFGVFTTNIWL	0.85709	VEDYGFGVFTT
1447	DENV-3-NS1	GVFTTNIWLKLREVY	1.62435
1448	DENV-3-NS1	FTTNIWLKLREVYTQ	0.0973865
1449	DENV-3-NS1	TNIWLKLREVYTQLC	0.790475
1450	DENV-3-NS1	IWLKLREVYTQLCDH	2.39494
1451	DENV-3-NS1	LKLREVYTQLCDHRL	1.59726	LKLREVYT
1460	DENV-3-NS1	AVKDERAVHADMGYW	0.892867
1461	DENV-3-NS1	KDERAVHADMGYWIE	1.10635	KDERAVHADMGYW
1481	DENV-3-NS1	HTLWSNGVLESDMII	1.90412	HTLWSNGVLESDMII
1498	DENV-3-NS1	QTAGPWHLGKLELDF	0.0280713
1499	DENV-3-NS1	AGPWHLGKLELDFNY	1.47613
1500	DENV-3-NS1	PWHLGKLELDFNYCE	0.52649	PWHLGKLELDF
1503	DENV-3-NS1	LELDFNYCEGTTVVI	0.128357
1504	DENV-3-NS1	LDFNYCEGTTVVITE	0.959079	LDFNYCEGTTVVI
1515	DENV-3-NS1	SLRTTTVSGKLIHEW	0.800383	SLRTTTVSGKLIHEW
1519	DENV-3-NS1	GKLIHEWCCRSCTLP	0.174289	GKLIHEWCCRSCTLP
1525	DENV-3-NS1	TLPPLRYMGEDGCWY	1.07415	TLPPLRYMGEDGCWY
1527	DENV-3-NS1	LRYMGEDGCWYGMEI	0.40768	LRYMGEDGCWYGMEI
1551	DENV-4-NS1	GRELKCGSGIFVVDN	1.38732
1552	DENV-4-NS1	ELKCGSGIFVVDNVH	1.60745
1553	DENV-4-NS1	KCGSGIFVVDNVHTW	1.35693
1554	DENV-4-NS1	GSGIFVVDNVHTWTE	2.26158
1555	DENV-4-NS1	GIFVVDNVHTWTEQY	2.80169	GIFVVD
1573	DENV-4-NS1	VCGIRSTTRLENVMW	0.893803	VCGIRSTTRLENVMW
1577	DENV-4-NS1	RLENVMWKQITNELN	2.61674	RLENVMWKQITNELN
1579	DENV-4-NS1	VMWKQITNELNYVLW	0.00278748
1580	DENV-4-NS1	WKQITNELNYVLWEG	1.53406
1581	DENV-4-NS1	QITNELNYVLWEGGH	2.3836
1582	DENV-4-NS1	TNELNYVLWEGGHDL	3.15282
1583	DENV-4-NS1	ELNYVLWEGGHDLTV	2.22959
1584	DENV-4-NS1	NYVLWEGGHDLTVVA	1.8672	NYVLW
1607	DENV-4-NS1	KIFTPEARNSTFLID	1.9646
1608	DENV-4-NS1	FTPEARNSTFLIDGP	2.45585
1609	DENV-4-NS1	PEARNSTFLIDGPDT	0.606347	PEARNSTFLID
1616	DENV-4-NS1	TSECPNERRAWNSFE	3.07852
1617	DENV-4-NS1	ECPNERRAWNSFEVE	2.73764
1618	DENV-4-NS1	PNERRAWNSFEVEDY	0.255847
1619	DENV-4-NS1	ERRAWNSFEVEDYGF	1.28786
1620	DENV-4-NS1	RAWNSFEVEDYGFGM	0.107989
1621	DENV-4-NS1	WNSFEVEDYGFGMFT	0.298717
1622	DENV-4-NS1	SFEVEDYGFGMFTTN	2.77509	SFE
1623	DENV-4-NS1	EVEDYGFGMFTTNIW	1.79151	EVEDYGFGMFTTNIW
1640	DENV-4-NS1	IKDQKAVHADMGYWI	0.279673	IKDQKAVHADMGYWI
1646	DENV-4-NS1	YWIESSKNQTWQIER	1.27652	YWIESSKNQTWQIER
1648	DENV-4-NS1	SSKNQTWQIERASLI	0.346512
1649	DENV-4-NS1	KNQTWQIERASLIEV	2.39243	KNQTWQIERASLI
1658	DENV-4-NS1	LWPKTHTLWSNGVLE	0.511296	LWPKTHTLWSNGVLE
1677	DENV-4-NS1	TQTVGPWHLGKLEID	1.57547
1678	DENV-4-NS1	TVGPWHLGKLEIDFG	2.95806	TVGPWHLGKLEID
1702	DENV-4-NS1	CCRSCTMPPLRFLGE	0.743777
1703	DENV-4-NS1	RSCTMPPLRFLGEDG	0.916423
1704	DENV-4-NS1	CTMPPLRFLGEDGCW	0.714234
1705	DENV-4-NS1	MPPLRFLGEDGCWYG	0.198203
1706	DENV-4-NS1	PLRFLGEDGCWYGME	0.607793
1707	DENV-4-NS1	RFLGEDGCWYGMEIR	2.11779
1708	DENV-4-NS1	LGEDGCWYGMEIRPL	0.944457	LGE
1709	DENV-4-NS1	EDGCWYGMEIRPLSE	0.0791236	EDGCWYGMEIRPLSE
1733	ZIKV-NS1	CGTGVFVYNDVEAWR	1.59113
1734	ZIKV-NS1	TGVFVYNDVEAWRDR	1.78001
1735	ZIKV-NS1	VFVYNDVEAWRDRYK	0.149555
1736	ZIKV-NS1	VYNDVEAWRDRYKYH	0.213717	VYNDVEAWR
1744	ZIKV-NS1	DSPRRLAAAVKQAWE	0.00106399	DSPRRLAAAVKQAWE
1746	ZIKV-NS1	RLAAAVKQAWEDGIC	1.49661	RLAAAVKQAWEDGIC
1757	ZIKV-NS1	MENIMWRSVEGELNA	1.11739
1758	ZIKV-NS1	NIMWRSVEGELNAIL	3.58919
1759	ZIKV-NS1	MWRSVEGELNAILEE	1.30055
1760	ZIKV-NS1	RSVEGELNAILEENG	0.276496
1761	ZIKV-NS1	VEGELNAILEENGVQ	0.243777	VEGELNA
1763	ZIKV-NS1	LNAILEENGVQLTVV	3.05757	LNAILEENGVQLTVV
1771	ZIKV-NS1	GSVKNPMWRGPQRLP	0.464064	GSVKNPMWRGPQRLP
1774	ZIKV-NS1	MWRGPQRLPVPVNEL	0.871605
1775	ZIKV-NS1	RGPQRLPVPVNELPH	1.332
1776	ZIKV-NS1	PQRLPVPVNELPHGW	2.4689	PQRLPVPVNEL
1798	ZIKV-NS1	LKHRAWNSFLVEDHG	0.793545
1799	ZIKV-NS1	HRAWNSFLVEDHGFG	1.85156
1800	ZIKV-NS1	AWNSFLVEDHGFGVF	2.07017
1801	ZIKV-NS1	NSFLVEDHGFGVFHT	1.03865
1802	ZIKV-NS1	FLVEDHGFGVFHTSV	0.868516	FLVEDHG
1806	ZIKV-NS1	GVFHTSVWLKVREDY	2.76925
1807	ZIKV-NS1	FHTSVWLKVREDYSL	1.72138
1808	ZIKV-NS1	TSVWLKVREDYSLEC	0.790102
1809	ZIKV-NS1	VWLKVREDYSLECDP	0.779673	VWLKVREDY
1820	ZIKV-NS1	KGKEAVHSDLGYWIE	1.32736	KGKEAVHSDLGYWIE
1824	ZIKV-NS1	DLGYWIESEKNDTWR	0.546007	DLGYWIESEKNDTWR
1837	ZIKV-NS1	CEWPKSHTLWTDGIE	0.777173	CEWPKSHTLWTDGIE
1840	ZIKV-NS1	HTLWTDGIEESDLII	1.35287
1841	ZIKV-NS1	LWTDGIEESDLIIPK	0.70945	LWTDGIEESDLII
1849	ZIKV-NS1	LAGPLSHHNTREGYR	0.313866	LAGPLSHHNTREGYR
1855	ZIKV-NS1	GYRTQMKGPWHSEEL	0.425062
1856	ZIKV-NS1	RTQMKGPWHSEELEI	1.61783
1857	ZIKV-NS1	QMKGPWHSEELEIRF	2.69657
1858	ZIKV-NS1	KGPWHSEELEIRFEE	2.01557
1859	ZIKV-NS1	PWHSEELEIRFEECP	1.92539	PWHSEEL
1873	ZIKV-NS1	GPSLRSTTASGRVIE	0.352867
1874	ZIKV-NS1	SLRSTTASGRVIEEW	3.07294	SLRSTTASGRVIE
1876	ZIKV-NS1	TTASGRVIEEWCCRE	0.00106399	TTASGRVIEEWCCRE

## Sheet: Z3-Z8
Peptide code	Virus-Protein	Peptides sequence	Intensity	Epitopes sequence	Virus-Protein	Peptides	Epitopes
5	DENV-1-E	RCVGIGNRDFVEGLS	3.80669		DENV-1-E	24	16
6	DENV-1-E	VGIGNRDFVEGLSGA	1.76678		DENV-2-E	34	18
7	DENV-1-E	IGNRDFVEGLSGATW	1.22609	IGNRDFVEGLSGATW	DENV-3-E	30	22
9	DENV-1-E	DFVEGLSGATWVDVV	2.4971		DENV-4-E	41	25
10	DENV-1-E	VEGLSGATWVDVVLE	3.94127		ZIKV-E	30	16
11	DENV-1-E	GLSGATWVDVVLEHG	1.15851		DENV-1-NS1	26	14
12	DENV-1-E	SGATWVDVVLEHGSC	2.55336	SGATWVDVV	DENV-2-NS1	31	17
21	DENV-1-E	MAKNKPTLDIELLKT	1.65238	MAKNKPTLDIELLKT	DENV-3-NS1	23	16
24	DENV-1-E	TLDIELLKTEVTNPA	0.976309	TLDIELLKTEVTNPA	DENV-4-NS1	26	15
30	DENV-1-E	NPAVLRKLCIEAKIS	0.3398	NPAVLRKLCIEAKIS	ZIKV-NS1	41	17
46	DENV-1-E	EEQDANFVCRRTFVD	0.340194	EEQDANFVCRRTFVD	TOTAL	306	176
67	DENV-1-E	EGKIVQYENLKYSVI	0.984553	EGKIVQYENLKYSVI
79	DENV-1-E	QVGNETTEHGTIATI	0.743477
80	DENV-1-E	GNETTEHGTIATITP	0.777034	GNETTEHGTIATI
89	DENV-1-E	TSEIQLTDYGALTLD	0.0767653	TSEIQLTDYGALTLD
94	DENV-1-E	ALTLDCSPRTGLDFN	1.93389
95	DENV-1-E	TLDCSPRTGLDFNEM	0.415801	TLDCSPRTGLDFN
101	DENV-1-E	NEMVLLTMKEKSWLV	3.45143	NEMVLLTMKEKSWLV
113	DENV-1-E	LPWTSGASTSQETWN	1.45916	LPWTSGASTSQETWN
118	DENV-1-E	QETWNRQDLLVTFKT	3.31524	QETWNRQDLLVTFKT
133	DENV-1-E	GAMHTALTGATEIQT	1.57315	GAMHTALTGATEIQT
175	DENV-1-E	EKGVTQNGRLITANP	0.848534	EKGVTQNGRLITANP
189	DENV-1-E	EPPFGESYIVVGAGE	0.397538	EPPFGESYIVVGAGE
195	DENV-1-E	AGEKALKLSWFKGSG	0.158515
199	DENV-1/2-E	SWFKGSGSGSGMRCI	1.04732
200	DENV-1/2-E	FKGSGSGSGMRCIGI	0.254837
204	DENV-2-E	GMRCIGISNRDFVEG	1.27634
205	DENV-2-E	RCIGISNRDFVEGVS	0.928488
206	DENV-2-E	IGISNRDFVEGVSGG	2.53255
207	DENV-2-E	ISNRDFVEGVSGGSW	2.13601
208	DENV-2-E	NRDFVEGVSGGSWVD	0.882091
209	DENV-2-E	DFVEGVSGGSWVDIV	0.683828
210	DENV-2-E	VEGVSGGSWVDIVLE	2.09108
211	DENV-2-E	GVSGGSWVDIVLEHG	0.244787	GVS
221	DENV-2-E	MAKNKPTLDFELIKT	4.7914
222	DENV-2-E	KNKPTLDFELIKTEA	0.995695
223	DENV-2-E	KPTLDFELIKTEAKQ	1.19936	KPTLDFELIKT
225	DENV-2-E	DFELIKTEAKQPATL	1.65425	DFELIKTEAKQPATL
239	DENV-2-E	TESRCPTQGEPSLNE	2.19208
240	DENV-2-E	SRCPTQGEPSLNEEQ	2.94421
241	DENV-2-E	CPTQGEPSLNEEQDK	2.65123
242	DENV-2-E	TQGEPSLNEEQDKRF	2.7905	TQGEPSLNE
246	DENV-2-E	EEQDKRFICKHSMVD	3.79121	EEQDKRFICKHSMVD
254	DENV-2-E	GWGNGCGLFGKGGIV	1.75823
255	DENV-2-E	GNGCGLFGKGGIVTC	1.13228	GNGCGLFGKGGIV
267	DENV-2-E	EGKIVQPENLEYTIV	2.69875
268	DENV-2-E	KIVQPENLEYTIVIT	1.97615	KIVQPENLEYTIV
271	DENV-2-E	NLEYTIVITPHSGEE	2.12498
272	DENV-2-E	EYTIVITPHSGEEHA	0.3398	EYTIVITPHSGEE
274	DENV-2-E	VITPHSGEEHAVGND	2.98089	VITPHSGEEHAVGND
285	DENV-2-E	IKITPQSSTTEAELT	0.527761	IKITPQSSTTEAELT
297	DENV-2-E	SPRTGLDFNEMVLLQ	0.592128	SPRTGLDFNEMVLLQ
308	DENV-2-E	VHRQWFLDLPLPWLP	0.473288	VHRQWFLDLPLPWLP
310	DENV-2-E	WFLDLPLPWLPGADT	0.214814	WFLDLPLPWLPGADT
350	DENV-2-E	LQLKGMSYSMCTGKF	0.397538	LQLKGMSYSMCTGKF
368	DENV-2-E	GDGSPCKIPFEITDL	1.63187	GDGSPCKIPFEITDL
386	DENV-2-E	PVNIEAEPPFGDSYI	0.122225	PVNIEAEPPFGDSYI
389	DENV-2-E	EPPFGDSYIIVGVEP	1.23575	EPPFGDSYIIVGVEP
393	DENV-2-E	IIVGVEPGQLKLNWF	0.277034	IIVGVEPGQLKLNWF
397	DENV-2-E	QLKLNWFKGSGSGSG	0.484553
398	DENV-2/3-E	KLNWFKGSGSGSGMR	2.25823
399	DENV-2/3-E	NWFKGSGSGSGMRCV	1.20905
400	DENV-2/3-E	FKGSGSGSGMRCVGV	0.860761
404	DENV-3-E	GMRCVGVGNRDFVEG	1.26466
405	DENV-3-E	RCVGVGNRDFVEGLS	1.57969	RCVGVGNRDFVEG
407	DENV-3-E	VGNRDFVEGLSGATW	2.0095	VGNRDFVEGLSGATW
410	DENV-3-E	VEGLSGATWVDVVLE	0.707693
411	DENV-3-E	GLSGATWVDVVLEHG	2.16856
412	DENV-3-E	SGATWVDVVLEHGGC	2.58571	SGATWVDVVLE
421	DENV-3-E	MAKNKPTLDIELQKT	1.64102	MAKNKPTLDIELQKT
442	DENV-3-E	TQGEAVLPEEQDQNY	0.225345	TQGEAVLPEEQDQNY
446	DENV-3-E	EEQDQNYVCKHTYVD	5.53717	EEQDQNYVCKHTYVD
467	DENV-3-E	EGKVVQYENLKYTVI	0.0767653	EGKVVQYENLKYTVI
478	DENV-3-E	QHQVGNETQGVTAEI	0.878801	QHQVGNETQGVTAEI
490	DENV-3-E	ILPEYGTLGLECSPR	0.132281	ILPEYGTLGLECSPR
492	DENV-3-E	YGTLGLECSPRTGLD	0.359564
493	DENV-3-E	TLGLECSPRTGLDFN	1.12017	TLGLECSPRTGLD
496	DENV-3-E	SPRTGLDFNEMILLT	0.605057	SPRTGLDFNEMILLT
512	DENV-3-E	LPWTSGATAETPTWN	2.8516
513	DENV-3-E	WTSGATAETPTWNRK	2.25484	WTSGATAETPTWN
515	DENV-3-E	ATAETPTWNRKELLV	0.0473184	ATAETPTWNRKELLV
531	DENV-3-E	QEGAMHTALTGATEI	0.3398	QEGAMHTALTGATEI
558	DENV-3-E	KEVSETQHGTILIKV	0.950996	KEVSETQHGTILIKV
561	DENV-3-E	QHGTILIKVEYKGED	1.9408	QHGTILIKVEYKGED
565	DENV-3-E	VEYKGEDAPCKIPFS	2.4392	VEYKGEDAPCKIPFS
574	DENV-3-E	GQGKAHNGRLITANP	0.690646	GQGKAHNGRLITANP
578	DENV-3-E	RLITANPVVTKKEEP	3.33453	RLITANPVVTKKEEP
580	DENV-3-E	ANPVVTKKEEPVNIE	4.01272	ANPVVTKKEEPVNIE
584	DENV-3-E	EEPVNIEAEPPFGES	7.009
585	DENV-3-E	PVNIEAEPPFGESNI	0.105057	PVNIEAEPPFGES
587	DENV-3-E	EAEPPFGESNIVIGI	0.829711
588	DENV-3-E	EPPFGESNIVIGIGD	0.983858	EPPFGESNIVIGI
596	DENV-3-E	ALKINWYKGSGSGSG	2.55303
597	DENV-3/4-E	KINWYKGSGSGSGMR	2.769
598	DENV-3/4-E	NWYKGSGSGSGMRCV	1.74956
604	DENV-4-E	RCVGVGNRDFVEGVS	0.675413	RCVGVGNRDFVEGVS
609	DENV-4-E	VEGVSGGAWVDLVLE	1.52083	VEGVSGGAWVDLVLE
611	DENV-4-E	SGGAWVDLVLEHGGC	0.397538	SGGAWVDLVLEHGGC
619	DENV-4-E	TTMAQGKPTLDFELT	1.3989
620	DENV-4-E	MAQGKPTLDFELTKT	4.54789
621	DENV-4-E	QGKPTLDFELTKTTA	2.44726
622	DENV-4-E	KPTLDFELTKTTAKE	1.70321	KPTLDFELT
624	DENV-4-E	DFELTKTTAKEVALL	0.795077	DFELTKTTAKEVALL
630	DENV-4-E	ALLRTYCIEALISNI	0.415801
631	DENV-4-E	LRTYCIEALISNITT	2.87568
632	DENV-4-E	TYCIEALISNITTAT	0.0473184
633	DENV-4-E	CIEALISNITTATRC	3.83381
636	DENV-4-E	SNITTATRCPTQGEP	0.903218	CIEALISNI
638	DENV-4-E	TATRCPTQGEPYLKE	2.70065	TATRCPTQGEPYLKE
642	DENV-4-E	GEPYLKEEQDQQYIC	2.69232	GEPYLKEEQDQQYIC
645	DENV-4-E	EEQDQQYICRRDVVD	2.48891	EEQDQQYICRRDVVD
653	DENV-4-E	GWGNGCGLFGKGGVV	0.720206	GWGNGCGLFGKGGVV
666	DENV-4-E	TGNLVQIENLEYTVV	2.89154
667	DENV-4-E	NLVQIENLEYTVVVT	0.0767653	NLVQIENLEYTVV
673	DENV-4-E	VVTVHNGDTHAVGND	0.652341	VVTVHNGDTHAVGND
678	DENV-4-E	AVGNDTSNHGVTATI	2.27925	AVGNDTSNHGVTATI
680	DENV-4-E	DTSNHGVTATITPRS	1.58471	DTSNHGVTATITPRS
689	DENV-4-E	EVKLPDYGELTLDCE	3.80995	EVKLPDYGELTLDCE
691	DENV-4-E	PDYGELTLDCEPRSG	3.74638	PDYGELTLDCEPRSG
693	DENV-4-E	ELTLDCEPRSGIDFN	0.470061	ELTLDCEPRSGIDFN
700	DENV-4-E	NEMILMKMKKKTWLV	2.09056	NEMILMKMKKKTWLV
730	DENV-4-E	GSQEGAMHSALAGAT	1.47983
731	DENV-4-E	QEGAMHSALAGATEV	4.62353
732	DENV-4-E	GAMHSALAGATEVDS	4.47501
733	DENV-4-E	MHSALAGATEVDSGD	5.00625
734	DENV-4-E	SALAGATEVDSGDGN	4.89168	SALAGAT
738	DENV-4-E	VDSGDGNHMFAGHLK	0.935549	VDSGDGNHMFAGHLK
758	DENV-4-E	KEMAETQHGTTVVKV	0.39211	KEMAETQHGTTVVKV
762	DENV-4-E	GTTVVKVKYEGAGAP	2.89846
763	DENV-4-E	TVVKVKYEGAGAPCK	0.959533
764	DENV-4-E	VKVKYEGAGAPCKVP	3.92849
765	DENV-4-E	VKYEGAGAPCKVPIE	0.3398
766	DENV-4-E	YEGAGAPCKVPIEIR	0.183828	YEGAGAP
768	DENV-4-E	GAPCKVPIEIRDVNK	1.175	GAPCKVPIEIRDVNK
786	DENV-4-E	NIELEPPFGDSYIVI	0.140005	NIELEPPFGDSYIVI
788	DENV-4-E	EPPFGDSYIVIGVGN	0.200429	EPPFGDSYIVIGVGN
803	ZIKV-E	GMRCIGVSNRDFVEG	3.35079
804	ZIKV-E	RCIGVSNRDFVEGMS	1.8325	RCIGVSNRDFVEGMS
807	ZIKV-E	NRDFVEGMSGGTWVD	0.105057
808	ZIKV-E	DFVEGMSGGTWVDVV	0.803809
809	ZIKV-E	VEGMSGGTWVDVVLE	0.692607	VEGMSGGTWVD
874	ZIKV-E	SVHGSQHSGMIVNDT	4.94907
875	ZIKV-E	HGSQHSGMIVNDTGH	5.17987
876	ZIKV-E	SQHSGMIVNDTGHET	5.7099
877	ZIKV-E	HSGMIVNDTGHETDE	5.52844
878	ZIKV-E	GMIVNDTGHETDENR	2.03799	GMIVNDT
882	ZIKV-E	HETDENRAKVEITPN	1.73644
883	ZIKV-E	TDENRAKVEITPNSP	3.31585	TDENRAKVEITPN
898	ZIKV-E	CEPRTGLDFSDLYYL	1.10795	CEPRTGLDFSDLYYL
910	ZIKV-E	HKEWFHDIPLPWHAG	0.0767653	HKEWFHDIPLPWHAG
934	ZIKV-E	EGAVHTALAGALEAE	0.994727
935	ZIKV-E	AVHTALAGALEAEMD	1.76456	AVHTALAGALEA
938	ZIKV-E	AGALEAEMDGAKGRL	0.809099	AGALEAEMDGAKGRL
953	ZIKV-E	LKGVSYSLCTAAFTF	1.20225	LKGVSYSLCTAAFTF
956	ZIKV-E	SLCTAAFTFTKIPAE	2.72686	SLCTAAFTFTKIPAE
963	ZIKV-E	ETLHGTVTVEVQYAG	0.105057	ETLHGTVTVEVQYAG
965	ZIKV-E	GTVTVEVQYAGTDGP	0.209046	GTVTVEVQYAGTDGP
978	ZIKV-E	QTLTPVGRLITANPV	0.0767653
979	ZIKV-E	LTPVGRLITANPVIT	0.59105
980	ZIKV-E	PVGRLITANPVITES	0.46797	PVGRLITANPV
983	ZIKV-E	TANPVITESTENSKM	0.632281	TANPVITESTENSKM
989	ZIKV-E	SKMMLELDPPFGDSY	0.498308
990	ZIKV-E	MMLELDPPFGDSYIV	0.150632
991	ZIKV-E	LELDPPFGDSYIVIG	1.98386
992	ZIKV-E	LDPPFGDSYIVIGVG	1.00897	LDPPFGDSY
994	ZIKV-E	FGDSYIVIGVGEKKI	2.17134	FGDSYIVIGVGEKKI
1004	ZIKV-E/DENV-1-NS1	RGSGSGSGDSGCVIN	0.0767653
1027	DENV-1-NS1	PKRLSAAIGKAWEEG	2.87217
1028	DENV-1-NS1	RLSAAIGKAWEEGVC	1.19616
1029	DENV-1-NS1	SAAIGKAWEEGVCGI	2.66601
1030	DENV-1-NS1	AIGKAWEEGVCGIRS	0.397538	AIGKAWEEG
1033	DENV-1-NS1	EEGVCGIRSATRLEN	6.2445	EEGVCGIRSATRLEN
1042	DENV-1-NS1	KQISNELNHILLEND	0.122454	KQISNELNHILLEND
1065	DENV-1-NS1	WKSWGKAKIIGADIQ	2.34106
1066	DENV-1-NS1	SWGKAKIIGADIQNT	0.8398
1067	DENV-1-NS1	GKAKIIGADIQNTTF	0.277034
1068	DENV-1-NS1	AKIIGADIQNTTFII	0.743477	AKIIGADIQ
1072	DENV-1-NS1	QNTTFIIDGPDTPEC	0.0473184	AKIIGADIQNTTFII
1079	DENV-1-NS1	CPDGQRAWNIWEVED	0.415801
1080	DENV-1-NS1	DGQRAWNIWEVEDYG	1.15928	DGQRAWNIWEVED
1085	DENV-1-NS1	VEDYGFGVFTTNIWL	0.484553	VEDYGFGVFTTNIWL
1089	DENV-1-NS1	FTTNIWLKLRDSYTQ	1.60459	FTTNIWLKLRDSYTQ
1126	DENV-1-NS1	LESEMIIPKIFGGPI	1.95996
1127	DENV-1-NS1	SEMIIPKIFGGPISQ	0.950996
1128	DENV-1-NS1	MIIPKIFGGPISQHN	1.96771	MIIPKIFGGPI
1132	DENV-1-NS1	GPISQHNYRPGYFTQ	1.45557	GPISQHNYRPGYFTQ
1144	DENV-1-NS1	LELDFDLCEGTTVVV	0.397538	LELDFDLCEGTTVVV
1150	DENV-1-NS1	VVVDEHCGNRGPSLR	2.56459
1151	DENV-1-NS1	VDEHCGNRGPSLRTT	1.54808
1152	DENV-1-NS1	EHCGNRGPSLRTTTV	2.02311	EHCGNRGPSLR
1154	DENV-1-NS1	NRGPSLRTTTVTGKI	0.183828
1155	DENV-1-NS1	GPSLRTTTVTGKIIH	3.98321	GPSLRTTTVTGKI
1172	DENV-1-NS1	CWYGMEIRPVKEKEE	2.09221	CWYGMEIRPVKEKEE
1197	DENV-2-NS1	FITDNVHTWTEQYKF	4.09354	FITDNVHTWTEQYKF
1206	DENV-2-NS1	SPSKLASAIQKAHEE	3.44041
1207	DENV-2-NS1	SKLASAIQKAHEEGI	2.57024	SKLASAIQKAHEEGI
1209	DENV-2-NS1	SAIQKAHEEGICGIR	1.31703
1210	DENV-2-NS1	IQKAHEEGICGIRSV	1.55704	IQKAHEEGICGIRSV
1259	DENV-2-NS1	PNTNRAWNSLEVEDY	0.0735703	PNTNRAWNSLEVEDY
1263	DENV-2-NS1	SLEVEDYGFGVFTTN	1.82753
1264	DENV-2-NS1	EVEDYGFGVFTTNIW	0.645517	EVEDYGFGVFTTN
1275	DENV-2-NS1	DVFCDSKLMSAAIKD	0.231935	DVFCDSKLMSAAIKD
1284	DENV-2-NS1	VHADMGYWIESALND	2.45227
1285	DENV-2-NS1	ADMGYWIESALNDTW	1.37956	ADMGYWIESALND
1296	DENV-2-NS1	IEVKSCHWPKSHTLW	0.208282	IEVKSCHWPKSHTLW
1305	DENV-2-NS1	VLESEMVIPKNFAGP	0.705833
1306	DENV-2-NS1	ESEMVIPKNFAGPVS	2.72559	ESEMVIPKNFAGP
1308	DENV-2-NS1	VIPKNFAGPVSQHNY	0.183828	VIPKNFAGPVSQHNY
1319	DENV-2-NS1	TAGPWHLGKLEMDFD	0.198139	TAGPWHLGKLEMDFD
1324	DENV-2-NS1	EMDFDFCEGTTVVVT	0.254837
1325	DENV-2-NS1	DFDFCEGTTVVVTED	0.849749
1326	DENV-2-NS1	DFCEGTTVVVTEDCE	1.74681	DFCEGTTVVVT
1332	DENV-2-NS1	DCEKRGPSLRTTTAS	3.20024	DCEKRGPSLRTTTAS
1334	DENV-2-NS1	RGPSLRTTTASGKLI	1.94486	RGPSLRTTTASGKLI
1342	DENV-2-NS1	EWCCRSCTLPPLRYR	0.415763
1343	DENV-2-NS1	CCRSCTLPPLRYRGE	0.3398
1344	DENV-2-NS1	RSCTLPPLRYRGEDG	0.132281
1345	DENV-2-NS1	CTLPPLRYRGEDGCW	0.484553
1346	DENV-2-NS1	LPPLRYRGEDGCWYG	0.743477	LPPLRYR
1352	DENV-2-NS1	WYGMEIRPLKEKEEN	1.24956	WYGMEIRPLKEKEEN
1354	DENV-2-NS1	EIRPLKEKEENLVNS	2.53166
1355	DENV-2-NS1	RPLKEKEENLVNSLV	0.208282	RPLKEKEENLVNS
1357	DENV-2-NS1	EKEENLVNSLVTAGS	1.17128
1358	DENV-2-NS1	EENLVNSLVTAGSGS	6.36181
1398	DENV-3-NS1	MENLLWKQIANELNY	0.827427	MENLLWKQIANELNY
1401	DENV-3-NS1	KQIANELNYILWENN	0.655182	KQIANELNYILWENN
1415	DENV-3-NS1	LEQGKRTLTPQPMEL	0.298569	LEQGKRTLTPQPMEL
1418	DENV-3-NS1	TLTPQPMELKYSWKT	1.4824	TLTPQPMELKYSWKT
1427	DENV-3-NS1	AKIVTAETQNSSFII	0.051143	AKIVTAETQNSSFII
1432	DENV-3-NS1	SSFIIDGPNTPECPS	3.21729	SSFIIDGPNTPECPS
1439	DENV-3-NS1	SASRAWNVWEVEDYG	0.415801	SASRAWNVWEVEDYG
1443	DENV-3-NS1	WEVEDYGFGVFTTNI	0.288978
1444	DENV-3-NS1	VEDYGFGVFTTNIWL	0.0606947	VEDYGFGVFTTNI
1485	DENV-3-NS1	LESDMIIPKSLAGPI	0.433613
1486	DENV-3-NS1	SDMIIPKSLAGPISQ	0.378801	SDMIIPKSLAGPI
1493	DENV-3-NS1	QHNHRPGYHTQTAGP	0.105057	QHNHRPGYHTQTAGP
1506	DENV-3-NS1	YCEGTTVVITENCGT	2.54205	YCEGTTVVITENCGT
1509	DENV-3-NS1	VVITENCGTRGPSLR	2.17359
1510	DENV-3-NS1	ITENCGTRGPSLRTT	2.08708	ITENCGTRGPSLRTT
1514	DENV-3-NS1	GPSLRTTTVSGKLIH	2.70985	GPSLRTTTVSGKLIH
1522	DENV-3-NS1	WCCRSCTLPPLRYMG	1.53901
1523	DENV-3-NS1	CRSCTLPPLRYMGED	0.183828
1524	DENV-3-NS1	SCTLPPLRYMGEDGC	0.618797
1525	DENV-3-NS1	TLPPLRYMGEDGCWY	0.866368	TLPPLRYM
1531	DENV-3-NS1	CWYGMEIRPISEKEE	2.10289
1532	DENV-3-NS1	YGMEIRPISEKEENM	0.696159	YGMEIRPISEKEE
1536	DENV-3-NS1	SEKEENMVKSLVSAG	1.79697	SEKEENMVKSLVSAG
1552	DENV-4-NS1	ELKCGSGIFVVDNVH	0.438491
1553	DENV-4-NS1	KCGSGIFVVDNVHTW	2.90852
1554	DENV-4-NS1	GSGIFVVDNVHTWTE	2.49518
1555	DENV-4-NS1	GIFVVDNVHTWTEQY	2.21715
1556	DENV-4-NS1	FVVDNVHTWTEQYKF	2.95973
1557	DENV-4-NS1	VDNVHTWTEQYKFQP	4.96114	VDNVH
1582	DENV-4-NS1	TNELNYVLWEGGHDL	0.46797	TNELNYVLWEGGHDL
1587	DENV-4-NS1	GGHDLTVVAGDVKGV	1.46574
1588	DENV-4-NS1	HDLTVVAGDVKGVLT	2.52294	HDLTVVAGDVKGV
1594	DENV-4-NS1	VLTKGKRALTPPASD	0.319479	VLTKGKRALTPPASD
1609	DENV-4-NS1	PEARNSTFLIDGPDT	2.43418
1610	DENV-4-NS1	ARNSTFLIDGPDTSE	5.03085
1611	DENV-4-NS1	NSTFLIDGPDTSECP	5.21185
1612	DENV-4-NS1	TFLIDGPDTSECPNE	4.53069
1613	DENV-4-NS1	LIDGPDTSECPNERR	2.07913	LIDGPDT
1615	DENV-4-NS1	PDTSECPNERRAWNS	2.94189	PDTSECPNERRAWNS
1634	DENV-4-NS1	SEVCDHRLMSAAIKD	0.74602	SEVCDHRLMSAAIKD
1637	DENV-4-NS1	RLMSAAIKDQKAVHA	1.15851	RLMSAAIKDQKAVHA
1654	DENV-4-NS1	SLIEVKTCLWPKTHT	2.41897	SLIEVKTCLWPKTHT
1674	DENV-4-NS1	YRQGYATQTVGPWHL	0.132281	YRQGYATQTVGPWHL
1678	DENV-4-NS1	TVGPWHLGKLEIDFG	1.26126	TVGPWHLGKLEIDFG
1687	DENV-4-NS1	GTTVTIQENCDHRGP	0.208282	GTTVTIQENCDHRGP
1691	DENV-4-NS1	NCDHRGPSLRTTTAS	3.41053	NCDHRGPSLRTTTAS
1711	DENV-4-NS1	WYGMEIRPLSEKEEN	0.359564	WYGMEIRPLSEKEEN
1713	DENV-4-NS1	EIRPLSEKEENMVKS	1.10582	EIRPLSEKEENMVKS
1717	DENV-4-NS1	EENMVKSQVTAGSGS	6.0586
1719	DENV-4-ZIKV-NS1	VKSQVTAGSGSGSGD	0.254837
1720	DENV-4-ZIKV-NS1	SQVTAGSGSGSGDVG	1.11683
1724	ZIKV-NS1	SGSGDVGCSVDFSKK	2.33098
1725	ZIKV-NS1	SGDVGCSVDFSKKET	2.82821
1734	ZIKV-NS1	TGVFVYNDVEAWRDR	0.190836
1735	ZIKV-NS1	VFVYNDVEAWRDRYK	1.70905
1736	ZIKV-NS1	VYNDVEAWRDRYKYH	1.68293	VYNDVEAWRDR
1739	ZIKV-NS1	AWRDRYKYHPDSPRR	0.484588	AWRDRYKYHPDSPRR
1745	ZIKV-NS1	PRRLAAAVKQAWEDG	0.547318	PRRLAAAVKQAWEDG
1759	ZIKV-NS1	MWRSVEGELNAILEE	2.81835	MWRSVEGELNAILEE
1787	ZIKV-NS1	FVRAAKTNNSFVVDG	4.0441
1788	ZIKV-NS1	RAAKTNNSFVVDGDT	4.01669
1789	ZIKV-NS1	AKTNNSFVVDGDTLK	0.429712
1790	ZIKV-NS1	TNNSFVVDGDTLKEC	2.39513
1791	ZIKV-NS1	NSFVVDGDTLKECPL	5.34333	NSFVVDG
1797	ZIKV-NS1	CPLKHRAWNSFLVED	2.38216	CPLKHRAWNSFLVED
1803	ZIKV-NS1	VEDHGFGVFHTSVWL	0.231935
1804	ZIKV-NS1	DHGFGVFHTSVWLKV	2.40368	DHGFGVFHTSVWL
1808	ZIKV-NS1	TSVWLKVREDYSLEC	0.484553
1809	ZIKV-NS1	VWLKVREDYSLECDP	3.30022	VWLKVREDYSLECDP
1811	ZIKV-NS1	VREDYSLECDPAVIG	1.52466	VREDYSLECDPAVIG
1832	ZIKV-NS1	KRAHLIEMKTCEWPK	0.720206	KRAHLIEMKTCEWPK
1840	ZIKV-NS1	HTLWTDGIEESDLII	4.12804	HTLWTDGIEESDLII
1844	ZIKV-NS1	EESDLIIPKSLAGPL	5.90574
1845	ZIKV-NS1	SDLIIPKSLAGPLSH	1.90199
1846	ZIKV-NS1	LIIPKSLAGPLSHHN	2.73367	LIIPKSLAGPL
1850	ZIKV-NS1	GPLSHHNTREGYRTQ	2.56955	GPLSHHNTREGYRTQ
1855	ZIKV-NS1	GYRTQMKGPWHSEEL	0.59105
1856	ZIKV-NS1	RTQMKGPWHSEELEI	0.319479
1857	ZIKV-NS1	QMKGPWHSEELEIRF	2.76357
1858	ZIKV-NS1	KGPWHSEELEIRFEE	3.65891
1859	ZIKV-NS1	PWHSEELEIRFEECP	2.78238	PWHSEEL
1861	ZIKV-NS1	EELEIRFEECPGTKV	6.37024	EELEIRFEECPGTKV
1863	ZIKV-NS1	IRFEECPGTKVHVEE	1.62318	IRFEECPGTKVHVEE
1868	ZIKV-NS1	VHVEETCGTRGPSLR	1.54356
1869	ZIKV-NS1	VEETCGTRGPSLRST	2.75466
1870	ZIKV-NS1	ETCGTRGPSLRSTTA	0.516618
1871	ZIKV-NS1	CGTRGPSLRSTTASG	0.859564
1872	ZIKV-NS1	TRGPSLRSTTASGRV	0.532132
1873	ZIKV-NS1	GPSLRSTTASGRVIE	4.21152
1874	ZIKV-NS1	SLRSTTASGRVIEEW	0.618797	SLR
1880	ZIKV-NS1	EEWCCRECTMPPLSF	2.84467
1882	ZIKV-NS1	CRECTMPPLSFRAKD	1.19284

## Sheet: Z27
Peptide code	Virus-Protein	Peptides sequence	Intensity	Epitopes sequence	Virus-Protein	Peptides	Epitopes
1	DENV-1-E	GSGSGSGMRCVGIGN	3.66021		DENV-1-E	26	14
2	DENV-1-E	GSGSGMRCVGIGNRD	0.864405		DENV-2-E	40	19
4	DENV-1-E	GMRCVGIGNRDFVEG	1.22186		DENV-3-E	40	19
7	DENV-1-E	IGNRDFVEGLSGATW	0.933157	IGNRDFVEGLSGATW	DENV-4-E	41	26
11	DENV-1-E	GLSGATWVDVVLEHG	1.98279	GLSGATWVDVVLEHG	ZIKV-E	45	30
36	DENV-1-E	KISNTTTDSRCPTQG	0.177207	KISNTTTDSRCPTQG	DENV-1-NS1	29	23
47	DENV-1-E	QDANFVCRRTFVDRG	0.40449		DENV-2-NS1	21	13
48	DENV-1-E	ANFVCRRTFVDRGWG	1.89412		DENV-3-NS1	25	20
49	DENV-1-E	FVCRRTFVDRGWGNG	2.40319		DENV-4-NS1	29	19
50	DENV-1-E	CRRTFVDRGWGNGCG	2.57078	CRRTFVDRG	ZIKV-NS1	25	21
52	DENV-1-E	FVDRGWGNGCGLFGK	0.423727	FVDRGWGNGCGLFGK	TOTAL	321	204
54	DENV-1-E	GWGNGCGLFGKGSLL	0.0294794	GWGNGCGLFGKGSLL
145	DENV-1-E	HLKCRLKMDKLTLKG	0.271675	HLKCRLKMDKLTLKG
149	DENV-1-E	DKLTLKGMSYVMCTG	1.15477
150	DENV-1-E	LTLKGMSYVMCTGSF	1.30845	LTLKGMSYVMCTG
152	DENV-1-E	GMSYVMCTGSFKLEK	1.16898	GMSYVMCTGSFKLEK
156	DENV-1-E	GSFKLEKEVAETQHG	2.48227	GSFKLEKEVAETQHG
169	DENV-1-E	DAPCKIPFSTQDEKG	0.0294794	DAPCKIPFSTQDEKG
172	DENV-1-E	PFSTQDEKGVTQNGR	0.0922448	PFSTQDEKGVTQNGR
176	DENV-1-E	GVTQNGRLITANPIV	0.512896	GVTQNGRLITANPIV
188	DENV-1-E	ETEPPFGESYIVVGA	0.121692
189	DENV-1-E	EPPFGESYIVVGAGE	0.776862	EPPFGESYIVVGA
194	DENV-1-E	VGAGEKALKLSWFKG	1.10863
195	DENV-1-E	AGEKALKLSWFKGSG	0.0294794
196	DENV-1-E	EKALKLSWFKGSGSG	0.384726
197	DENV-1-E	ALKLSWFKGSGSGSG	1.36716
198	DENV-1/2-E	KLSWFKGSGSGSGMR	0.677207
200	DENV-1/2-E	FKGSGSGSGMRCIGI	0.776862
201	DENV-2-E	GSGSGSGMRCIGISN	2.45439
202	DENV-2-E	GSGSGMRCIGISNRD	2.38029
203	DENV-2-E	GSGMRCIGISNRDFV	0.637507
204	DENV-2-E	GMRCIGISNRDFVEG	1.71664
206	DENV-2-E	IGISNRDFVEGVSGG	7.12506	IGISNRDFVEGVSGG
209	DENV-2-E	DFVEGVSGGSWVDIV	1.22251	DFVEGVSGGSWVDIV
211	DENV-2-E	GVSGGSWVDIVLEHG	3.5953
212	DENV-2-E	SGGSWVDIVLEHGSC	0.380421
213	DENV-2-E	GSWVDIVLEHGSCVT	1.18386	GSWVDIVLEHG
236	DENV-2-E	KLTNTTTESRCPTQG	0.845454	KLTNTTTESRCPTQG
247	DENV-2-E	QDKRFICKHSMVDRG	0.741085
248	DENV-2-E	KRFICKHSMVDRGWG	2.09591
249	DENV-2-E	FICKHSMVDRGWGNG	2.5844
250	DENV-2-E	CKHSMVDRGWGNGCG	2.62852	CKHSMVDRG
252	DENV-2-E	MVDRGWGNGCGLFGK	1.17721
253	DENV-2-E	DRGWGNGCGLFGKGG	6.71179
254	DENV-2-E	GWGNGCGLFGKGGIV	1.2592
255	DENV-2-E	GNGCGLFGKGGIVTC	2.72329
256	DENV-2-E	GCGLFGKGGIVTCAM	1.98728
257	DENV-2-E	GLFGKGGIVTCAMFT	1.87209
258	DENV-2-E	FGKGGIVTCAMFTCK	1.86182	FGK
277	DENV-2-E	GEEHAVGNDTGKHGK	0.203441	GEEHAVGNDTGKHGK
282	DENV-2-E	GKHGKEIKITPQSST	0.788404
283	DENV-2-E	HGKEIKITPQSSTTE	0.0294794	HGKEIKITPQSST
292	DENV-2-E	TGYGTVTMECSPRTG	0.93574	TGYGTVTMECSPRTG
311	DENV-2-E	LDLPLPWLPGADTQG	1.17313	LDLPLPWLPGADTQG
330	DENV-2-E	VLGSQEGAMHTALTG	0.0922448	VLGSQEGAMHTALTG
338	DENV-2-E	TEIQMSSGNLLFTGH	0.149983	TEIQMSSGNLLFTGH
345	DENV-2-E	HLKCRLRMDKLQLKG	0.621692	HLKCRLRMDKLQLKG
349	DENV-2-E	DKLQLKGMSYSMCTG	0.276862	DKLQLKGMSYSMCTG
352	DENV-2-E	GMSYSMCTGKFKIVK	1.97582	GMSYSMCTGKFKIVK
356	DENV-2-E	GKFKIVKEIAETQHG	2.98815	GKFKIVKEIAETQHG
362	DENV-2-E	QHGTIVIRVQYEGDG	1.06785
363	DENV-2-E	GTIVIRVQYEGDGSP	0.384726	GTIVIRVQYEGDG
371	DENV-2-E	KIPFEITDLEKRHVL	0.48506	KIPFEITDLEKRHVL
390	DENV-2-E	PFGDSYIIVGVEPGQ	0.206687	PFGDSYIIVGVEPGQ
394	DENV-2-E	VGVEPGQLKLNWFKG	1.06193
395	DENV-2-E	VEPGQLKLNWFKGSG	0.592245
396	DENV-2-E	PGQLKLNWFKGSGSG	1.23526
397	DENV-2-E	QLKLNWFKGSGSGSG	1.08469
400	DENV-2/3-E	FKGSGSGSGMRCVGV	0.914173
401	DENV-3-E	GSGSGSGMRCVGVGN	4.00197
402	DENV-3-E	GSGSGMRCVGVGNRD	1.3439
404	DENV-3-E	GMRCVGVGNRDFVEG	1.39298
411	DENV-3-E	GLSGATWVDVVLEHG	0.186489
412	DENV-3-E	SGATWVDVVLEHGGC	3.31052	SGATWVDVVLEHG
416	DENV-3-E	VLEHGGCVTTMAKNK	0.894676	VLEHGGCVTTMAKNK
418	DENV-3-E	GGCVTTMAKNKPTLD	5.27804	GGCVTTMAKNKPTLD
436	DENV-3-E	KITNITTDSRCPTQG	0.203441	KITNITTDSRCPTQG
447	DENV-3-E	QDQNYVCKHTYVDRG	0.764986
448	DENV-3-E	QNYVCKHTYVDRGWG	2.29856
449	DENV-3-E	YVCKHTYVDRGWGNG	3.13354
450	DENV-3-E	CKHTYVDRGWGNGCG	2.95794	CKHTYVDRG
452	DENV-3-E	YVDRGWGNGCGLFGK	1.92595
453	DENV-3-E	DRGWGNGCGLFGKGS	1.42373
454	DENV-3-E	GWGNGCGLFGKGSLV	1.67721
455	DENV-3-E	GNGCGLFGKGSLVTC	0.321961	GNGCGLFGK
476	DENV-3-E	HTGDQHQVGNETQGV	0.832808	HTGDQHQVGNETQGV
491	DENV-3-E	PEYGTLGLECSPRTG	0.0294794	PEYGTLGLECSPRTG
525	DENV-3-E	HAKKQEVVVLGSQEG	0.749131	HAKKQEVVVLGSQEG
534	DENV-3-E	TALTGATEIQNSGGT	4.09466
535	DENV-3-E	LTGATEIQNSGGTSI	1.00446
536	DENV-3-E	GATEIQNSGGTSIFA	2.04368
537	DENV-3-E	TEIQNSGGTSIFAGH	1.69697
538	DENV-3-E	IQNSGGTSIFAGHLK	3.85476	IQNSGGT
540	DENV-3-E	GGTSIFAGHLKCRLK	6.50104	GGTSIFAGHLKCRLK
551	DENV-3-E	GMSYAMCTNTFVLKK	1.27858	GMSYAMCTNTFVLKK
560	DENV-3-E	ETQHGTILIKVEYKG	0.960931	ETQHGTILIKVEYKG
562	DENV-3-E	GTILIKVEYKGEDAP	0.0294794	GTILIKVEYKGEDAP
567	DENV-3-E	GEDAPCKIPFSTEDG	2.10654
568	DENV-3-E	DAPCKIPFSTEDGQG	0.993886
569	DENV-3-E	PCKIPFSTEDGQGKA	0.149983	PCKIPFSTEDG
571	DENV-3-E	PFSTEDGQGKAHNGR	0.253209	PFSTEDGQGKAHNGR
574	DENV-3-E	GQGKAHNGRLITANP	0.753209
575	DENV-3-E	GKAHNGRLITANPVV	0.299764	GKAHNGRLITANP
588	DENV-3-E	EPPFGESNIVIGIGD	0.90449	EPPFGESNIVIGIGD
590	DENV-3-E	GESNIVIGIGDNALK	0.121692	GESNIVIGIGDNALK
593	DENV-3-E	IGIGDNALKINWYKG	1.08278
594	DENV-3-E	IGDNALKINWYKGSG	0.995922
595	DENV-3-E	DNALKINWYKGSGSG	0.635976
596	DENV-3-E	ALKINWYKGSGSGSG	1.13598
599	DENV-3/4-E	YKGSGSGSGMRCVGV	0.0922448
600	DENV-4-E	GSGSGSGMRCVGVGN	2.91101
605	DENV-4-E	VGVGNRDFVEGVSGG	5.09468	VGVGNRDFVEGVSGG
608	DENV-4-E	DFVEGVSGGAWVDLV	0.500542	DFVEGVSGGAWVDLV
610	DENV-4-E	GVSGGAWVDLVLEHG	3.64332
611	DENV-4-E	SGGAWVDLVLEHGGC	4.27906
612	DENV-4-E	GAWVDLVLEHGGCVT	0.727734
613	DENV-4-E	WVDLVLEHGGCVTTM	0.121692	WVDLVLEHG
615	DENV-4-E	VLEHGGCVTTMAQGK	2.7226	VLEHGGCVTTMAQGK
617	DENV-4-E	GGCVTTMAQGKPTLD	5.51661	GGCVTTMAQGKPTLD
635	DENV-4-E	LISNITTATRCPTQG	1.49	LISNITTATRCPTQG
646	DENV-4-E	QDQQYICRRDVVDRG	0.893416
647	DENV-4-E	QQYICRRDVVDRGWG	1.87113
648	DENV-4-E	YICRRDVVDRGWGNG	2.09245
649	DENV-4-E	CRRDVVDRGWGNGCG	1.59599	CRRDVVDRG
651	DENV-4-E	VVDRGWGNGCGLFGK	1.41897
652	DENV-4-E	DRGWGNGCGLFGKGG	6.59473
653	DENV-4-E	GWGNGCGLFGKGGVV	2.02124	GWGNGCGLFGK
656	DENV-4-E	GLFGKGGVVTCAKFS	1.41417
657	DENV-4-E	FGKGGVVTCAKFSCS	1.57321
658	DENV-4-E	KGGVVTCAKFSCSGK	0.577058	KGGVVTCAKFS
676	DENV-4-E	GDTHAVGNDTSNHGV	1.18041	GDTHAVGNDTSNHGV
691	DENV-4-E	PDYGELTLDCEPRSG	1.46731	PDYGELTLDCEPRSG
723	DENV-4-E	FKVPHAKRQDVTVLG	0.364405	FKVPHAKRQDVTVLG
725	DENV-4-E	HAKRQDVTVLGSQEG	0.40449	HAKRQDVTVLGSQEG
727	DENV-4-E	QDVTVLGSQEGAMHS	2.94073	QDVTVLGSQEGAMHS
732	DENV-4-E	GAMHSALAGATEVDS	0.177207	GAMHSALAGATEVDS
734	DENV-4-E	SALAGATEVDSGDGN	0.607118	SALAGATEVDSGDGN
737	DENV-4-E	TEVDSGDGNHMFAGH	0.228754	TEVDSGDGNHMFAGH
744	DENV-4-E	HLKCKVRMEKLRIKG	0.54569	HLKCKVRMEKLRIKG
748	DENV-4-E	EKLRIKGMSYTMCSG	0.677207	EKLRIKGMSYTMCSG
751	DENV-4-E	GMSYTMCSGKFSIDK	2.05522	GMSYTMCSGKFSIDK
755	DENV-4-E	GKFSIDKEMAETQHG	2.27817	GKFSIDKEMAETQHG
761	DENV-4-E	QHGTTVVKVKYEGAG	1.21544	QHGTTVVKVKYEGAG
767	DENV-4-E	GAGAPCKVPIEIRDV	0.343495	GAGAPCKVPIEIRDV
783	DENV-4-E	NTNSVTNIELEPPFG	0.0708076	NTNSVTNIELEPPFG
788	DENV-4-E	EPPFGDSYIVIGVGN	1.71207	EPPFGDSYIVIGVGN
790	DENV-4-E	GDSYIVIGVGNSALT	1.17008	GDSYIVIGVGNSALT
793	DENV-4-E	IGVGNSALTLHWFRG	2.63835
794	DENV-4-E	VGNSALTLHWFRGSG	0.892478
795	DENV-4-E	NSALTLHWFRGSGSG	0.663724
796	DENV-4-E	ALTLHWFRGSGSGSG	2.71473
799	DENV-4/ZIKV-E	FRGSGSGSGMRCIGV	2.3072
800	ZIKV-E	GSGSGSGMRCIGVSN	2.706
801	ZIKV-E	GSGSGMRCIGVSNRD	1.72156
803	ZIKV-E	GMRCIGVSNRDFVEG	2.14068
805	ZIKV-E	IGVSNRDFVEGMSGG	7.19439	IGVSNRDFVEGMSGG
810	ZIKV-E	GMSGGTWVDVVLEHG	5.21236	GMSGGTWVDVVLEHG
811	ZIKV-E	SGGTWVDVVLEHGGC	1.33211	SGGTWVDVVLEHGGC
815	ZIKV-E	VLEHGGCVTVMAQDK	1.29569	VLEHGGCVTVMAQDK
817	ZIKV-E	GGCVTVMAQDKPTVD	3.16002	GGCVTVMAQDKPTVD
835	ZIKV-E	SISDMASDSRCPTQG	1.07371	SISDMASDSRCPTQG
846	ZIKV-E	SDTQYVCKRTLVDRG	1.58458
847	ZIKV-E	TQYVCKRTLVDRGWG	2.25972
848	ZIKV-E	YVCKRTLVDRGWGNG	2.30687
849	ZIKV-E	CKRTLVDRGWGNGCG	3.16698	CKRTLVDRG
851	ZIKV-E	LVDRGWGNGCGLFGK	1.04569
852	ZIKV-E	DRGWGNGCGLFGKGS	0.864405
853	ZIKV-E	GWGNGCGLFGKGSLV	0.933157	GWGNGCGLFGK
860	ZIKV-E	VTCAKFACSKKMTGK	2.96185	VTCAKFACSKKMTGK
866	ZIKV-E	TGKSIQPENLEYRIM	5.30735
867	ZIKV-E	KSIQPENLEYRIMLS	4.2392
868	ZIKV-E	IQPENLEYRIMLSVH	0.47854
869	ZIKV-E	PENLEYRIMLSVHGS	1.59102	PENLEYRIM
875	ZIKV-E	HGSQHSGMIVNDTGH	0.97854	HGSQHSGMIVNDTGH
883	ZIKV-E	TDENRAKVEITPNSP	0.690443	TDENRAKVEITPNSP
887	ZIKV-E	EITPNSPRAEATLGG	7.03976
888	ZIKV-E	TPNSPRAEATLGGFG	2.08279	TPNSPRAEATLGG
890	ZIKV-E	PRAEATLGGFGSLGL	1.2592	PRAEATLGGFGSLGL
905	ZIKV-E	LTMNNKHWLVHKEWF	0.0294794	LTMNNKHWLVHKEWF
910	ZIKV-E	HKEWFHDIPLPWHAG	2.10654	HKEWFHDIPLPWHAG
912	ZIKV-E	FHDIPLPWHAGADTG	1.65248	FHDIPLPWHAGADTG
925	ZIKV-E	EFKDAHAKRQTVVVL	2.90021	EFKDAHAKRQTVVVL
928	ZIKV-E	AKRQTVVVLGSQEGA	0.253209	AKRQTVVVLGSQEGA
932	ZIKV-E	LGSQEGAVHTALAGA	0.592245	LGSQEGAVHTALAGA
937	ZIKV-E	ALAGALEAEMDGAKG	0.663724	ALAGALEAEMDGAKG
940	ZIKV-E	EAEMDGAKGRLSSGH	0.121692	EAEMDGAKGRLSSGH
947	ZIKV-E	HLKCRLKMDKLRLKG	1.65477	HLKCRLKMDKLRLKG
958	ZIKV-E	AAFTFTKIPAETLHG	0.149983	AAFTFTKIPAETLHG
961	ZIKV-E	KIPAETLHGTVTVEV	0.649983	KIPAETLHGTVTVEV
963	ZIKV-E	ETLHGTVTVEVQYAG	0.383505	ETLHGTVTVEVQYAG
965	ZIKV-E	GTVTVEVQYAGTDGP	2.8072	GTVTVEVQYAGTDGP
974	ZIKV-E	PAQMAVDMQTLTPVG	0.476971	PAQMAVDMQTLTPVG
984	ZIKV-E	NPVITESTENSKMML	0.299764	NPVITESTENSKMML
992	ZIKV-E	LDPPFGDSYIVIGVG	1.39388	LDPPFGDSYIVIGVG
998	ZIKV-E	GVGEKKITHHWHRGS	1.76485
999	ZIKV-E	GEKKITHHWHRGSGS	0.690443
1000	ZIKV-E	KKITHHWHRGSGSGS	0.228754
1001	ZIKV-E/DENV-1-NS1	ITHHWHRGSGSGSGD	1.04569
1002	ZIKV-E/DENV-1-NS1	HHWHRGSGSGSGDSG	2.05747
1006	DENV-1-NS1	SGSGDSGCVINWKGR	0.649983
1009	DENV-1-NS1	GCVINWKGRELKCGS	0.677207	GCVINWKGRELKCGS
1024	DENV-1-NS1	KFQADSPKRLSAAIG	0.742228	KFQADSPKRLSAAIG
1027	DENV-1-NS1	PKRLSAAIGKAWEEG	0.0589587	PKRLSAAIGKAWEEG
1043	DENV-1-NS1	ISNELNHILLENDMK	0.723491	ISNELNHILLENDMK
1046	DENV-1-NS1	HILLENDMKFTVVVG	1.18167	HILLENDMKFTVVVG
1048	DENV-1-NS1	ENDMKFTVVVGDANG	2.02452	ENDMKFTVVVGDANG
1051	DENV-1-NS1	TVVVGDANGILAQGK	0.894676	TVVVGDANGILAQGK
1053	DENV-1-NS1	GDANGILAQGKKMIR	1.81788	GDANGILAQGKKMIR
1060	DENV-1-NS1	RPQPMEHKYSWKSWG	1.79569	RPQPMEHKYSWKSWG
1063	DENV-1-NS1	HKYSWKSWGKAKIIG	1.00401	HKYSWKSWGKAKIIG
1067	DENV-1-NS1	GKAKIIGADIQNTTF	0.0615445	GKAKIIGADIQNTTF
1118	DENV-1-NS1	KTCTWPKSHTLWSNG	1.32255	KTCTWPKSHTLWSNG
1125	DENV-1-NS1	GVLESEMIIPKIFGG	7.24945	GVLESEMIIPKIFGG
1128	DENV-1-NS1	MIIPKIFGGPISQHN	2.47817	MIIPKIFGGPISQHN
1130	DENV-1-NS1	KIFGGPISQHNYRPG	5.02601
1131	DENV-1-NS1	FGGPISQHNYRPGYF	3.4447
1132	DENV-1-NS1	GPISQHNYRPGYFTQ	0.0922448	GPISQHNYRPG
1134	DENV-1-NS1	QHNYRPGYFTQTAGP	2.27403	QHNYRPGYFTQTAGP
1136	DENV-1-NS1	RPGYFTQTAGPWHLG	1.99307
1137	DENV-1-NS1	GYFTQTAGPWHLGKL	0.384726	GYFTQTAGPWHLG
1148	DENV-1-NS1	EGTTVVVDEHCGNRG	1.14392	EGTTVVVDEHCGNRG
1153	DENV-1-NS1	CGNRGPSLRTTTVTG	1.49237	CGNRGPSLRTTTVTG
1155	DENV-1-NS1	GPSLRTTTVTGKIIH	2.55071	GPSLRTTTVTGKIIH
1163	DENV-1-NS1	WCCRSCTLPPLRFRG	2.08278	WCCRSCTLPPLRFRG
1167	DENV-1-NS1	PPLRFRGEDGCWYGM	2.31606	PPLRFRGEDGCWYGM
1170	DENV-1-NS1	GEDGCWYGMEIRPVK	1.47194	GEDGCWYGMEIRPVK
1179	DENV-1-NS1	ENLVRSMVSAGSGSG	0.561545
1180	DENV-1-NS1	LVRSMVSAGSGSGSG	2.78064
1182	DENV-1/2-NS1	MVSAGSGSGSGDSGC	1.11417
1184	DENV-2-NS1	GSGSGSGDSGCIVSW	2.9981
1185	DENV-2-NS1	GSGSGDSGCIVSWKN	2.623
1186	DENV-2-NS1	GSGDSGCIVSWKNKE	0.276862
1189	DENV-2-NS1	CIVSWKNKELKCGSG	0.677207	CIVSWKNKELKCGSG
1200	DENV-2-NS1	HTWTEQYKFQPESPS	0.90449
1201	DENV-2-NS1	WTEQYKFQPESPSKL	1.9408
1202	DENV-2-NS1	EQYKFQPESPSKLAS	2.19044	EQYKFQPESPS
1204	DENV-2-NS1	FQPESPSKLASAIQK	0.741085	FQPESPSKLASAIQK
1230	DENV-2-NS1	LTIMTGDIKGIMQAG	2.00351	LTIMTGDIKGIMQAG
1249	DENV-2-NS1	LSTESHNQTFLIDGP	1.04238	LSTESHNQTFLIDGP
1305	DENV-2-NS1	VLESEMVIPKNFAGP	1.38801	VLESEMVIPKNFAGP
1310	DENV-2-NS1	NFAGPVSQHNYRPGY	2.71604	NFAGPVSQHNYRPGY
1313	DENV-2-NS1	SQHNYRPGYHTQTAG	2.38315	SQHNYRPGYHTQTAG
1316	DENV-2-NS1	PGYHTQTAGPWHLGK	1.57298	PGYHTQTAGPWHLGK
1328	DENV-2-NS1	GTTVVVTEDCEKRGP	2.71832	GTTVVVTEDCEKRGP
1333	DENV-2-NS1	EKRGPSLRTTTASGK	1.82469
1334	DENV-2-NS1	RGPSLRTTTASGKLI	1.83549
1335	DENV-2-NS1	PSLRTTTASGKLITE	1.22875	PSLRTTTASGK
1344	DENV-2-NS1	RSCTLPPLRYRGEDG	0.203441	RSCTLPPLRYRGEDG
1353	DENV-2-NS1	GMEIRPLKEKEENLV	0.121692	GMEIRPLKEKEENLV
1359	DENV-2-NS1	NLVNSLVTAGSGSGS	0.73292
1360	DENV-2/3-NS1	VNSLVTAGSGSGSGD	1.09224
1361	DENV-2/3-NS1	SLVTAGSGSGSGDMG	3.73175
1363	DENV-2/3-NS1	AGSGSGSGDMGCVIN	0.561545
1365	DENV-3-NS1	SGSGDMGCVINWKGK	0.960728
1368	DENV-3-NS1	GCVINWKGKELKCGS	1.82668
1369	DENV-3-NS1	VINWKGKELKCGSGI	0.299764	VINWKGKELKCGS
1386	DENV-3-NS1	PKRLATAIAGAWENG	1.59794	PKRLATAIAGAWENG
1388	DENV-3-NS1	ATAIAGAWENGVCGI	0.121692	ATAIAGAWENGVCGI
1405	DENV-3-NS1	YILWENNIKLTVVVG	1.3773	YILWENNIKLTVVVG
1407	DENV-3-NS1	ENNIKLTVVVGDIIG	1.75979	ENNIKLTVVVGDIIG
1410	DENV-3-NS1	TVVVGDIIGVLEQGK	0.442465	TVVVGDIIGVLEQGK
1419	DENV-3-NS1	TPQPMELKYSWKTWG	2.19173	TPQPMELKYSWKTWG
1464	DENV-3-NS1	HADMGYWIESQKNGS	0.577058	HADMGYWIESQKNGS
1477	DENV-3-NS1	KTCTWPKSHTLWSNG	1.68041	KTCTWPKSHTLWSNG
1484	DENV-3-NS1	GVLESDMIIPKSLAG	2.09298	GVLESDMIIPKSLAG
1489	DENV-3-NS1	KSLAGPISQHNHRPG	2.98522	KSLAGPISQHNHRPG
1491	DENV-3-NS1	GPISQHNHRPGYHTQ	2.55933	GPISQHNHRPGYHTQ
1493	DENV-3-NS1	QHNHRPGYHTQTAGP	3.17158	QHNHRPGYHTQTAGP
1495	DENV-3-NS1	RPGYHTQTAGPWHLG	2.88386
1496	DENV-3-NS1	GYHTQTAGPWHLGKL	1.42886	GYHTQTAGPWHLG
1507	DENV-3-NS1	EGTTVVITENCGTRG	1.20985	EGTTVVITENCGTRG
1512	DENV-3-NS1	CGTRGPSLRTTTVSG	2.93762	CGTRGPSLRTTTVSG
1514	DENV-3-NS1	GPSLRTTTVSGKLIH	2.53085	GPSLRTTTVSGKLIH
1522	DENV-3-NS1	WCCRSCTLPPLRYMG	0.343495	WCCRSCTLPPLRYMG
1526	DENV-3-NS1	PPLRYMGEDGCWYGM	2.32545	PPLRYMGEDGCWYGM
1529	DENV-3-NS1	GEDGCWYGMEIRPIS	1.36619	GEDGCWYGMEIRPIS
1538	DENV-3-NS1	ENMVKSLVSAGSGSG	0.343495
1539	DENV-3-NS1	MVKSLVSAGSGSGSG	2.33218
1541	DENV-3/4-NS1	LVSAGSGSGSGDMGC	0.495922
1543	DENV-4-NS1	GSGSGSGDMGCVVSW	1.85614
1544	DENV-4-NS1	GSGSGDMGCVVSWSG	3.54958
1545	DENV-4-NS1	GSGDMGCVVSWSGRE	0.177207
1547	DENV-4-NS1	MGCVVSWSGRELKCG	0.321961
1548	DENV-4-NS1	CVVSWSGRELKCGSG	1.59138	CVVSWSGRELKCG
1567	DENV-4-NS1	LASAILNAHKDGVCG	1.1207	LASAILNAHKDGVCG
1581	DENV-4-NS1	QITNELNYVLWEGGH	5.6232
1582	DENV-4-NS1	TNELNYVLWEGGHDL	1.70105
1583	DENV-4-NS1	ELNYVLWEGGHDLTV	4.0118
1584	DENV-4-NS1	NYVLWEGGHDLTVVA	2.52711
1585	DENV-4-NS1	VLWEGGHDLTVVAGD	4.9289
1586	DENV-4-NS1	WEGGHDLTVVAGDVK	1.24109
1587	DENV-4-NS1	GGHDLTVVAGDVKGV	7.36995	GGH
1589	DENV-4-NS1	LTVVAGDVKGVLTKG	0.651171	LTVVAGDVKGVLTKG
1599	DENV-4-NS1	PPASDLKYSWKTWGK	0.0615445	PPASDLKYSWKTWGK
1608	DENV-4-NS1	FTPEARNSTFLIDGP	1.46878	FTPEARNSTFLIDGP
1620	DENV-4-NS1	RAWNSFEVEDYGFGM	0.499313	RAWNSFEVEDYGFGM
1626	DENV-4-NS1	FGMFTTNIWMKFREG	1.43042	FGMFTTNIWMKFREG
1639	DENV-4-NS1	AAIKDQKAVHADMGY	0.299764	AAIKDQKAVHADMGY
1664	DENV-4-NS1	VLESQMLIPKSYAGP	1.93253	VLESQMLIPKSYAGP
1669	DENV-4-NS1	SYAGPFSQHNYRQGY	2.91138	SYAGPFSQHNYRQGY
1672	DENV-4-NS1	SQHNYRQGYATQTVG	2.63576	SQHNYRQGYATQTVG
1675	DENV-4-NS1	QGYATQTVGPWHLGK	1.21394	QGYATQTVGPWHLGK
1678	DENV-4-NS1	TVGPWHLGKLEIDFG	1.4408	TVGPWHLGKLEIDFG
1687	DENV-4-NS1	GTTVTIQENCDHRGP	3.4221	GTTVTIQENCDHRGP
1692	DENV-4-NS1	DHRGPSLRTTTASGK	1.1207	DHRGPSLRTTTASGK
1703	DENV-4-NS1	RSCTMPPLRFLGEDG	1.6966	RSCTMPPLRFLGEDG
1705	DENV-4-NS1	MPPLRFLGEDGCWYG	0.874637	MPPLRFLGEDGCWYG
1707	DENV-4-NS1	RFLGEDGCWYGMEIR	0.799764	RFLGEDGCWYGMEIR
1719	DENV-4-ZIKV-NS1	VKSQVTAGSGSGSGD	1.78867
1720	DENV-4-ZIKV-NS1	SQVTAGSGSGSGDVG	3.22208
1727	ZIKV-NS1	GCSVDFSKKETRCGT	0.623089	GCSVDFSKKETRCGT
1755	ZIKV-NS1	SVSRMENIMWRSVEG	0.866192	SVSRMENIMWRSVEG
1760	ZIKV-NS1	RSVEGELNAILEENG	0.469537	RSVEGELNAILEENG
1764	ZIKV-NS1	AILEENGVQLTVVVG	0.974462	AILEENGVQLTVVVG
1769	ZIKV-NS1	TVVVGSVKNPMWRGP	2.68964	TVVVGSVKNPMWRGP
1771	ZIKV-NS1	GSVKNPMWRGPQRLP	0.0615445	GSVKNPMWRGPQRLP
1773	ZIKV-NS1	NPMWRGPQRLPVPVN	0.649983	NPMWRGPQRLPVPVN
1776	ZIKV-NS1	PQRLPVPVNELPHGW	0.299764	PQRLPVPVNELPHGW
1778	ZIKV-NS1	PVPVNELPHGWKAWG	2.89386	PVPVNELPHGWKAWG
1784	ZIKV-NS1	AWGKSYFVRAAKTNN	0.0294794	AWGKSYFVRAAKTNN
1798	ZIKV-NS1	LKHRAWNSFLVEDHG	0.929079
1799	ZIKV-NS1	HRAWNSFLVEDHGFG	0.149463	HRAWNSFLVEDHG
1818	ZIKV-NS1	GTAVKGKEAVHSDLG	2.94692	GTAVKGKEAVHSDLG
1836	ZIKV-NS1	KTCEWPKSHTLWTDG	0.54569	KTCEWPKSHTLWTDG
1843	ZIKV-NS1	GIEESDLIIPKSLAG	2.39019	GIEESDLIIPKSLAG
1848	ZIKV-NS1	KSLAGPLSHHNTREG	1.90769	KSLAGPLSHHNTREG
1850	ZIKV-NS1	GPLSHHNTREGYRTQ	0.512896	GPLSHHNTREGYRTQ
1852	ZIKV-NS1	HHNTREGYRTQMKGP	2.82333	HHNTREGYRTQMKGP
1866	ZIKV-NS1	PGTKVHVEETCGTRG	0.916933	PGTKVHVEETCGTRG
1871	ZIKV-NS1	CGTRGPSLRSTTASG	1.60723	CGTRGPSLRSTTASG
1885	ZIKV-NS1	PPLSFRAKDGCWYGM	3.1423	PPLSFRAKDGCWYGM
1895	ZIKV-NS1	KEPESNLVRSMVTAG	0.364405	KEPESNLVRSMVTAG
1896	ZIKV-NS1	PESNLVRSMVTAGSG	0.830267
1897	ZIKV-NS1	SNLVRSMVTAGSGSG	0.90449
1898	ZIKV-NS1	LVRSMVTAGSGSGSG	3.08799

## Sheet: Z16-Z12-Z17
Peptide code	Virus-Protein	Peptides sequence	Intensity	Epitopes sequence	Virus-Protein	Peptides	Epitopes
21	DENV-1-E	MAKNKPTLDIELLKT	0.342863	MAKNKPTLDIELLKT	DENV-1-E	32	22
23	DENV-1-E	KPTLDIELLKTEVTN	1.9268	KPTLDIELLKTEVTN	DENV-2-E	40	21
29	DENV-1-E	VTNPAVLRKLCIEAK	2.41856	VTNPAVLRKLCIEAK	DENV-3-E	30	18
33	DENV-1-E	KLCIEAKISNTTTDS	2.13622		DENV-4-E	50	26
34	DENV-1-E	CIEAKISNTTTDSRC	1.45211	CIEAKISNTTTDS	ZIKV-E	34	25
38	DENV-1-E	TTTDSRCPTQGEATL	2.2763		DENV-1-NS1	32	23
39	DENV-1-E	TDSRCPTQGEATLVE	1.07453	TDSRCPTQGEATL	DENV-2-NS1	32	20
45	DENV-1-E	LVEEQDANFVCRRTF	0.468632	LVEEQDANFVCRRTF	DENV-3-NS1	34	24
51	DENV-1-E	RTFVDRGWGNGCGLF	0.439185	RTFVDRGWGNGCGLF	DENV-4-NS1	29	22
65	DENV-1-E	VTKLEGKIVQYENLK	3.80697	VTKLEGKIVQYENLK	ZIKV-NS1	32	22
72	DENV-1-E	KYSVIVTVHTGDQHQ	2.1633		TOTAL	345	223
73	DENV-1-E	SVIVTVHTGDQHQVG	0.731667
74	DENV-1-E	IVTVHTGDQHQVGNE	2.21173	IVTVHTGDQHQ
76	DENV-1-E	HTGDQHQVGNETTEH	0.146704	HTGDQHQVGNETTEH
95	DENV-1-E	TLDCSPRTGLDFNEM	0.600149	TLDCSPRTGLDFNEM
97	DENV-1-E	SPRTGLDFNEMVLLT	3.15134
98	DENV-1-E	RTGLDFNEMVLLTMK	3.0807	RTGLDFNEMVLLT
100	DENV-1-E	DFNEMVLLTMKEKSW	1.17584	DFNEMVLLTMKEKSW
103	DENV-1-E	LLTMKEKSWLVHKQW	2.45494	LLTMKEKSWLVHKQW
111	DENV-1-E	LDLPLPWTSGASTSQ	1.31833	LDLPLPWTSGASTSQ
114	DENV-1-E	WTSGASTSQETWNRQ	0.0503815	WTSGASTSQETWNRQ
117	DENV-1-E	TSQETWNRQDLLVTF	2.37978
118	DENV-1-E	QETWNRQDLLVTFKT	0.146704	QETWNRQDLLVTF
123	DENV-1-E	VTFKTAHAKKQEVVV	3.42453	VTFKTAHAKKQEVVV
136	DENV-1-E	LTGATEIQTSGTTTI	3.59496
137	DENV-1-E	GATEIQTSGTTTIFA	0.100149	GATEIQTSGTTTI
150	DENV-1-E	LTLKGMSYVMCTGSF	3.94751
151	DENV-1-E	LKGMSYVMCTGSFKL	0.996924	LKGMSYVMCTGSF
168	DENV-1-E	GTDAPCKIPFSTQDE	1.43089
169	DENV-1-E	DAPCKIPFSTQDEKG	0.85158	DAPCKIPFSTQDE
187	DENV-1-E	NIETEPPFGESYIVV	1.88358
188	DENV-1-E	ETEPPFGESYIVVGA	0.575695	ETEPPFGESYIVV
206	DENV-2-E	IGISNRDFVEGVSGG	0.751431
207	DENV-2-E	ISNRDFVEGVSGGSW	4.91926
208	DENV-2-E	NRDFVEGVSGGSWVD	0.600149	NRDFVEGVSGG
221	DENV-2-E	MAKNKPTLDFELIKT	3.46763
222	DENV-2-E	KNKPTLDFELIKTEA	1.58743
223	DENV-2-E	KPTLDFELIKTEAKQ	3.61472
224	DENV-2-E	TLDFELIKTEAKQPA	1.57739	TLDFELIKT
227	DENV-2-E	IKTEAKQPATLRKYC	0.524148	IKTEAKQPATLRKYC
232	DENV-2-E	LRKYCIEAKLTNTTT	3.32998
233	DENV-2-E	KYCIEAKLTNTTTES	3.58227
234	DENV-2-E	CIEAKLTNTTTESRC	2.5203
235	DENV-2-E	EAKLTNTTTESRCPT	0.870817
236	DENV-2-E	KLTNTTTESRCPTQG	1.26686	KLTNTTT
238	DENV-2-E	TTTESRCPTQGEPSL	3.05237	TTTESRCPTQGEPSL
245	DENV-2-E	LNEEQDKRFICKHSM	0.0503815	LNEEQDKRFICKHSM
278	DENV-2-E	EHAVGNDTGKHGKEI	0.550381
279	DENV-2-E	AVGNDTGKHGKEIKI	0.100149	AVGNDTGKHGKEI
283	DENV-2-E	HGKEIKITPQSSTTE	2.37555
284	DENV-2-E	KEIKITPQSSTTEAE	3.14426
285	DENV-2-E	IKITPQSSTTEAELT	5.27593
286	DENV-2-E	ITPQSSTTEAELTGY	4.50773
287	DENV-2-E	PQSSTTEAELTGYGT	5.04369
288	DENV-2-E	SSTTEAELTGYGTVT	5.5246	SSTTE
295	DENV-2-E	TMECSPRTGLDFNEM	1.83515
296	DENV-2-E	ECSPRTGLDFNEMVL	0.48596
297	DENV-2-E	SPRTGLDFNEMVLLQ	2.74346
298	DENV-2-E	RTGLDFNEMVLLQME	2.72859	RTGLDFNEM
300	DENV-2-E	DFNEMVLLQMEDKAW	2.25915	DFNEMVLLQMEDKAW
311	DENV-2-E	LDLPLPWLPGADTQG	0.958866	LDLPLPWLPGADTQG
319	DENV-2-E	NWIQKETLVTFKNPH	0.408485	NWIQKETLVTFKNPH
323	DENV-2-E	VTFKNPHAKKQDVVV	2.25988	VTFKNPHAKKQDVVV
325	DENV-2-E	NPHAKKQDVVVLGSQ	0.547305	NPHAKKQDVVVLGSQ
336	DENV-2-E	LTGATEIQMSSGNLL	4.88393
337	DENV-2-E	GATEIQMSSGNLLFT	0.342863	GATEIQMSSGNLL
340	DENV-2-E	MSSGNLLFTGHLKCR	3.32489	MSSGNLLFTGHLKCR
343	DENV-2-E	LFTGHLKCRLRMDKL	1.25804	LFTGHLKCRLRMDKL
378	DENV-2-E	LGRLITVNPIVTEKD	1.06195	LGRLITVNPIVTEKD
380	DENV-2-E	ITVNPIVTEKDSPVN	2.05809	ITVNPIVTEKDSPVN
383	DENV-2-E	VTEKDSPVNIEAEPP	0.342863	VTEKDSPVNIEAEPP
387	DENV-2-E	NIEAEPPFGDSYIIV	0.270279	NIEAEPPFGDSYIIV
407	DENV-3-E	VGNRDFVEGLSGATW	0.231667	VGNRDFVEGLSGATW
422	DENV-3-E	KNKPTLDIELQKTEA	0.211031
423	DENV-3-E	KPTLDIELQKTEATQ	0.231667	KPTLDIELQKTEA
436	DENV-3-E	KITNITTDSRCPTQG	0.524148	KITNITTDSRCPTQG
438	DENV-3-E	ITTDSRCPTQGEAVL	3.267
439	DENV-3-E	TDSRCPTQGEAVLPE	1.90782
440	DENV-3-E	SRCPTQGEAVLPEEQ	0.855469
441	DENV-3-E	CPTQGEAVLPEEQDQ	0.99278
442	DENV-3-E	TQGEAVLPEEQDQNY	1.62646
443	DENV-3-E	GEAVLPEEQDQNYVC	0.662894	GEAVL
461	DENV-3-E	VTCAKFQCLEPIEGK	0.146704	VTCAKFQCLEPIEGK
469	DENV-3-E	VQYENLKYTVIITVH	0.0473532	VQYENLKYTVIITVH
472	DENV-3-E	KYTVIITVHTGDQHQ	1.47984	KYTVIITVHTGDQHQ
474	DENV-3-E	IITVHTGDQHQVGNE	4.64334	IITVHTGDQHQVGNE
482	DENV-3-E	QGVTAEITPQASTTE	1.43726	QGVTAEITPQASTTE
492	DENV-3-E	YGTLGLECSPRTGLD	1.61308
493	DENV-3-E	TLGLECSPRTGLDFN	0.646704
494	DENV-3-E	GLECSPRTGLDFNEM	2.6305
495	DENV-3-E	ECSPRTGLDFNEMIL	0.92493
496	DENV-3-E	SPRTGLDFNEMILLT	3.1806
497	DENV-3-E	RTGLDFNEMILLTMK	3.71547	RTGLD
499	DENV-3-E	DFNEMILLTMKNKAW	1.2927	DFNEMILLTMKNKAW
502	DENV-3-E	LLTMKNKAWMVHRQW	3.10717	LLTMKNKAWMVHRQW
522	DENV-3-E	VTFKNAHAKKQEVVV	2.38274	VTFKNAHAKKQEVVV
535	DENV-3-E	LTGATEIQNSGGTSI	4.87837	LTGATEIQNSGGTSI
559	DENV-3-E	VSETQHGTILIKVEY	3.29815	VSETQHGTILIKVEY
579	DENV-3-E	ITANPVVTKKEEPVN	4.03683	ITANPVVTKKEEPVN
582	DENV-3-E	VTKKEEPVNIEAEPP	2.2799	VTKKEEPVNIEAEPP
584	DENV-3-E	EEPVNIEAEPPFGES	0.270668
585	DENV-3-E	PVNIEAEPPFGESNI	0.146704	PVNIEAEPPFGES
619	DENV-4-E	TTMAQGKPTLDFELT	0.277539
620	DENV-4-E	MAQGKPTLDFELTKT	4.37762
621	DENV-4-E	QGKPTLDFELTKTTA	2.40461
622	DENV-4-E	KPTLDFELTKTTAKE	3.3813
623	DENV-4-E	TLDFELTKTTAKEVA	6.07944
624	DENV-4-E	DFELTKTTAKEVALL	0.37642	DFELT
627	DENV-4-E	TTAKEVALLRTYCIE	0.378371	TTAKEVALLRTYCIE
629	DENV-4-E	EVALLRTYCIEALIS	1.19709
630	DENV-4-E	ALLRTYCIEALISNI	1.26905
631	DENV-4-E	LRTYCIEALISNITT	2.38025
632	DENV-4-E	TYCIEALISNITTAT	0.407817	TYCIEALIS
635	DENV-4-E	LISNITTATRCPTQG	2.65949	LISNITTATRCPTQG
637	DENV-4-E	ITTATRCPTQGEPYL	3.94778	ITTATRCPTQGEPYL
642	DENV-4-E	GEPYLKEEQDQQYIC	0.307668	GEPYLKEEQDQQYIC
668	DENV-4-E	VQIENLEYTVVVTVH	1.70035
669	DENV-4-E	IENLEYTVVVTVHNG	0.498822
670	DENV-4-E	NLEYTVVVTVHNGDT	0.439185
671	DENV-4-E	EYTVVVTVHNGDTHA	2.28881	EYTVVVTVH
673	DENV-4-E	VVTVHNGDTHAVGND	4.6217	VVTVHNGDTHAVGND
675	DENV-4-E	HNGDTHAVGNDTSNH	7.71454
676	DENV-4-E	GDTHAVGNDTSNHGV	6.78711
677	DENV-4-E	THAVGNDTSNHGVTA	7.34051
678	DENV-4-E	AVGNDTSNHGVTATI	5.95548
679	DENV-4-E	GNDTSNHGVTATITP	3.82532	GNDTSNH
683	DENV-4-E	VTATITPRSPSVEVK	3.50125	VTATITPRSPSVEVK
685	DENV-4-E	ITPRSPSVEVKLPDY	2.96521	ITPRSPSVEVKLPDY
689	DENV-4-E	EVKLPDYGELTLDCE	0.146704	EVKLPDYGELTLDCE
694	DENV-4-E	TLDCEPRSGIDFNEM	2.38708	TLDCEPRSGIDFNEM
696	DENV-4-E	EPRSGIDFNEMILMK	2.0016
697	DENV-4-E	RSGIDFNEMILMKMK	2.1702
698	DENV-4-E	GIDFNEMILMKMKKK	0.342863
699	DENV-4-E	DFNEMILMKMKKKTW	0.804592	DFNEMILMK
702	DENV-4-E	LMKMKKKTWLVHKQW	1.50444	LMKMKKKTWLVHKQW
710	DENV-4-E	LDLPLPWTTGADTSE	0.746853	LDLPLPWTTGADTSE
722	DENV-4-E	VTFKVPHAKRQDVTV	3.38592	VTFKVPHAKRQDVTV
728	DENV-4-E	VTVLGSQEGAMHSAL	6.30635	VTVLGSQEGAMHSAL
738	DENV-4-E	VDSGDGNHMFAGHLK	1.06007	VDSGDGNHMFAGHLK
749	DENV-4-E	LRIKGMSYTMCSGKF	0.270668	LRIKGMSYTMCSGKF
756	DENV-4-E	FSIDKEMAETQHGTT	2.87034
757	DENV-4-E	IDKEMAETQHGTTVV	0.496924	IDKEMAETQHGTT
769	DENV-4-E	PCKVPIEIRDVNKEK	1.24082	PCKVPIEIRDVNKEK
771	DENV-4-E	PIEIRDVNKEKVVGR	1.84374
772	DENV-4-E	EIRDVNKEKVVGRVI	1.44301	EIRDVNKEKVVGR
779	DENV-4-E	ISATPLAENTNSVTN	4.52171	ISATPLAENTNSVTN
781	DENV-4-E	PLAENTNSVTNIELE	2.19079
782	DENV-4-E	AENTNSVTNIELEPP	1.7019
783	DENV-4-E	NTNSVTNIELEPPFG	2.61353	NTNSVTNIELE
785	DENV-4-E	VTNIELEPPFGDSYI	3.87501
786	DENV-4-E	NIELEPPFGDSYIVI	0.347678
787	DENV-4-E	ELEPPFGDSYIVIGV	0.0108635	ELEPPFGDSYI
805	ZIKV-E	IGVSNRDFVEGMSGG	0.845052
806	ZIKV-E	VSNRDFVEGMSGGTW	4.37443	VSNRDFVEGMSGG
826	ZIKV-E	VTTTVSNMAEVRSYC	5.05573
827	ZIKV-E	TTVSNMAEVRSYCYE	2.07563
828	ZIKV-E	VSNMAEVRSYCYEAS	5.14355	VSNMAEVRSYC
833	ZIKV-E	CYEASISDMASDSRC	0.468632	CYEASISDMASDSRC
838	ZIKV-E	SDSRCPTQGEAYLDK	4.43001	SDSRCPTQGEAYLDK
841	ZIKV-E	TQGEAYLDKQSDTQY	0.231667
842	ZIKV-E	GEAYLDKQSDTQYVC	0.274009	GEAYLDKQSDTQY
844	ZIKV-E	LDKQSDTQYVCKRTL	1.71811	LDKQSDTQYVCKRTL
860	ZIKV-E	VTCAKFACSKKMTGK	1.29482	VTCAKFACSKKMTGK
868	ZIKV-E	IQPENLEYRIMLSVH	0.407817	IQPENLEYRIMLSVH
877	ZIKV-E	HSGMIVNDTGHETDE	3.22356
878	ZIKV-E	GMIVNDTGHETDENR	1.87334	GMIVNDTGHETDE
883	ZIKV-E	TDENRAKVEITPNSP	3.61949	TDENRAKVEITPNSP
893	ZIKV-E	LGGFGSLGLDCEPRT	3.18204	LGGFGSLGLDCEPRT
898	ZIKV-E	CEPRTGLDFSDLYYL	0.35592	CEPRTGLDFSDLYYL
900	ZIKV-E	TGLDFSDLYYLTMNN	0.408485
901	ZIKV-E	LDFSDLYYLTMNNKH	2.82401
902	ZIKV-E	FSDLYYLTMNNKHWL	4.69829	FSDLYYLTMNN
905	ZIKV-E	LTMNNKHWLVHKEWF	5.99551	LTMNNKHWLVHKEWF
909	ZIKV-E	LVHKEWFHDIPLPWH	1.10426	LVHKEWFHDIPLPWH
932	ZIKV-E	LGSQEGAVHTALAGA	3.14298	LGSQEGAVHTALAGA
945	ZIKV-E	LSSGHLKCRLKMDKL	5.85961	LSSGHLKCRLKMDKL
953	ZIKV-E	LKGVSYSLCTAAFTF	0.623802	LKGVSYSLCTAAFTF
959	ZIKV-E	FTFTKIPAETLHGTV	3.69305
960	ZIKV-E	FTKIPAETLHGTVTV	5.19606
961	ZIKV-E	KIPAETLHGTVTVEV	0.496924	KIPAETLHGTV
964	ZIKV-E	LHGTVTVEVQYAGTD	3.06601	LHGTVTVEVQYAGTD
966	ZIKV-E	VTVEVQYAGTDGPCK	5.76472	VTVEVQYAGTDGPCK
979	ZIKV-E	LTPVGRLITANPVIT	4.14916	LTPVGRLITANPVIT
982	ZIKV-E	LITANPVITESTENS	0.615336	LITANPVITESTENS
990	ZIKV-E	MMLELDPPFGDSYIV	0.17815	MMLELDPPFGDSYIV
992	ZIKV-E	LDPPFGDSYIVIGVG	2.53821	LDPPFGDSYIVIGVG
1001	ZIKV-E/DENV-1-NS1	ITHHWHRGSGSGSGD	6.54105
1017	DENV-1-NS1	IFVTNEVHTWTEQYK	2.34669
1018	DENV-1-NS1	VTNEVHTWTEQYKFQ	7.5926	VTNEVHTWTEQYK
1020	DENV-1-NS1	VHTWTEQYKFQADSP	1.21928	VHTWTEQYKFQADSP
1039	DENV-1-NS1	LENIMWKQISNELNH	2.92269	LENIMWKQISNELNH
1043	DENV-1-NS1	ISNELNHILLENDMK	6.15446	ISNELNHILLENDMK
1047	DENV-1-NS1	LLENDMKFTVVVGDA	0.100149	LLENDMKFTVVVGDA
1072	DENV-1-NS1	QNTTFIIDGPDTPEC	0.146704
1073	DENV-1-NS1	TTFIIDGPDTPECPD	0.307668
1074	DENV-1-NS1	FIIDGPDTPECPDGQ	0.393244
1075	DENV-1-NS1	IDGPDTPECPDGQRA	0.190435	IDGPDTPEC
1079	DENV-1-NS1	CPDGQRAWNIWEVED	0.700299
1080	DENV-1-NS1	DGQRAWNIWEVEDYG	1.07834	DGQRAWNIWEVED
1084	DENV-1-NS1	WEVEDYGFGVFTTNI	0.805795
1085	DENV-1-NS1	VEDYGFGVFTTNIWL	2.27178	VEDYGFGVFTTNI
1089	DENV-1-NS1	FTTNIWLKLRDSYTQ	4.16981	FTTNIWLKLRDSYTQ
1092	DENV-1-NS1	LKLRDSYTQMCDHRL	0.146704
1093	DENV-1-NS1	LRDSYTQMCDHRLMS	1.08803	LRDSYTQMCDHRL
1095	DENV-1-NS1	YTQMCDHRLMSAAIK	3.83056	YTQMCDHRLMSAAIK
1099	DENV-1-NS1	LMSAAIKDSKAVHAD	3.64892	LMSAAIKDSKAVHAD
1102	DENV-1-NS1	KDSKAVHADMGYWIE	1.51592	KDSKAVHADMGYWIE
1111	DENV-1-NS1	NETWKLARASFIEVK	0.760103	NETWKLARASFIEVK
1115	DENV-1-NS1	ASFIEVKTCTWPKSH	3.88569	ASFIEVKTCTWPKSH
1126	DENV-1-NS1	LESEMIIPKIFGGPI	1.27543	LESEMIIPKIFGGPI
1131	DENV-1-NS1	FGGPISQHNYRPGYF	0.100149	FGGPISQHNYRPGYF
1133	DENV-1-NS1	ISQHNYRPGYFTQTA	5.47511	ISQHNYRPGYFTQTA
1138	DENV-1-NS1	FTQTAGPWHLGKLEL	4.46224	FTQTAGPWHLGKLEL
1144	DENV-1-NS1	LELDFDLCEGTTVVV	0.731667	LELDFDLCEGTTVVV
1149	DENV-1-NS1	TTVVVDEHCGNRGPS	1.90541	TTVVVDEHCGNRGPS
1157	DENV-1-NS1	RTTTVTGKIIHEWCC	1.09243
1158	DENV-1-NS1	TTVTGKIIHEWCCRS	3.21615
1159	DENV-1-NS1	VTGKIIHEWCCRSCT	2.09984	VTGKIIHEWCC
1176	DENV-1-NS1	PVKEKEENLVRSMVS	0.870817	PVKEKEENLVRSMVS
1181	DENV-1/2-NS1	RSMVSAGSGSGSGDS	2.66771
1190	DENV-2-NS1	VSWKNKELKCGSGIF	0.539335	VSWKNKELKCGSGIF
1197	DENV-2-NS1	FITDNVHTWTEQYKF	0.524148
1198	DENV-2-NS1	TDNVHTWTEQYKFQP	3.53657	TDNVHTWTEQYK
1204	DENV-2-NS1	FQPESPSKLASAIQK	3.2035	FQPESPSKLASAIQK
1208	DENV-2-NS1	LASAIQKAHEEGICG	1.44928	LASAIQKAHEEGICG
1216	DENV-2-NS1	RSVTRLENLMWKQIT	1.40178
1217	DENV-2-NS1	VTRLENLMWKQITPE	5.97639	VTRLENLMWKQI
1220	DENV-2-NS1	LMWKQITPELNHILS	2.48404	LMWKQITPELNHILS
1230	DENV-2-NS1	LTIMTGDIKGIMQAG	5.90984	LTIMTGDIKGIMQAG
1249	DENV-2-NS1	LSTESHNQTFLIDGP	6.20072	LSTESHNQTFLIDGP
1252	DENV-2-NS1	NQTFLIDGPETAECP	0.650531
1253	DENV-2-NS1	TFLIDGPETAECPNT	0.307668
1254	DENV-2-NS1	LIDGPETAECPNTNR	0.496924
1255	DENV-2-NS1	DGPETAECPNTNRAW	0.0503815	DGPETAECP
1258	DENV-2-NS1	ECPNTNRAWNSLEVE	0.668901
1259	DENV-2-NS1	PNTNRAWNSLEVEDY	0.040675	PNTNRAWNSLEVE
1263	DENV-2-NS1	SLEVEDYGFGVFTTN	3.48218
1264	DENV-2-NS1	EVEDYGFGVFTTNIW	1.7003	EVEDYGFGVFTTN
1268	DENV-2-NS1	VFTTNIWLKLREKQD	4.23161	VFTTNIWLKLREKQD
1286	DENV-2-NS1	MGYWIESALNDTWKM	1.62073
1287	DENV-2-NS1	YWIESALNDTWKMEK	0.270668
1288	DENV-2-NS1	IESALNDTWKMEKAS	1.89324
1289	DENV-2-NS1	SALNDTWKMEKASFI	0.936109
1290	DENV-2-NS1	LNDTWKMEKASFIEV	1.43147	LNDTWKM
1310	DENV-2-NS1	NFAGPVSQHNYRPGY	1.91915	NFAGPVSQHNYRPGY
1321	DENV-2-NS1	WHLGKLEMDFDFCEG	0.0789642	WHLGKLEMDFDFCEG
1323	DENV-2-NS1	KLEMDFDFCEGTTVV	0.47085	KLEMDFDFCEGTTVV
1325	DENV-2-NS1	DFDFCEGTTVVVTED	1.8651	DFDFCEGTTVVVTED
1336	DENV-2-NS1	LRTTTASGKLITEWC	3.676
1337	DENV-2-NS1	TTTASGKLITEWCCR	3.40714	TTTASGKLITEWC
1341	DENV-2-NS1	ITEWCCRSCTLPPLR	2.35369	ITEWCCRSCTLPPLR
1348	DENV-2-NS1	RYRGEDGCWYGMEIR	0.690435	RYRGEDGCWYGMEIR
1360	DENV-2/3-NS1	VNSLVTAGSGSGSGD	2.69305
1362	DENV-2/3-NS1	VTAGSGSGSGDMGCV	2.01592
1376	DENV-3-NS1	IFVTNEVHTWTEQYK	1.10015
1377	DENV-3-NS1	VTNEVHTWTEQYKFQ	6.92279	VTNEVHTWTEQYK
1379	DENV-3-NS1	VHTWTEQYKFQADSP	0.190435	VHTWTEQYKFQADSP
1395	DENV-3-NS1	IRSTTRMENLLWKQI	0.100149	IRSTTRMENLLWKQI
1404	DENV-3-NS1	LNYILWENNIKLTVV	0.342863	LNYILWENNIKLTVV
1409	DENV-3-NS1	KLTVVVGDIIGVLEQ	0.321049	KLTVVVGDIIGVLEQ
1421	DENV-3-NS1	MELKYSWKTWGKAKI	0.146704
1422	DENV-3-NS1	LKYSWKTWGKAKIVT	2.92987
1423	DENV-3-NS1	YSWKTWGKAKIVTAE	2.51643	YSWKTWGKAKI
1426	DENV-3-NS1	GKAKIVTAETQNSSF	1.80112	GKAKIVTAETQNSSF
1428	DENV-3-NS1	IVTAETQNSSFIIDG	4.03865	IVTAETQNSSFIIDG
1431	DENV-3-NS1	QNSSFIIDGPNTPEC	3.76128
1432	DENV-3-NS1	SSFIIDGPNTPECPS	1.52882
1433	DENV-3-NS1	FIIDGPNTPECPSAS	1.4221	FIIDGPNTPEC
1438	DENV-3-NS1	CPSASRAWNVWEVED	0.190435
1439	DENV-3-NS1	SASRAWNVWEVEDYG	0.439185	SASRAWNVWEVED
1443	DENV-3-NS1	WEVEDYGFGVFTTNI	1.0048
1444	DENV-3-NS1	VEDYGFGVFTTNIWL	0.111848	VEDYGFGVFTTNI
1448	DENV-3-NS1	FTTNIWLKLREVYTQ	3.6417	FTTNIWLKLREVYTQ
1454	DENV-3-NS1	YTQLCDHRLMSAAVK	4.14752	YTQLCDHRLMSAAVK
1456	DENV-3-NS1	CDHRLMSAAVKDERA	0.968632	CDHRLMSAAVKDERA
1458	DENV-3-NS1	LMSAAVKDERAVHAD	3.12496	LMSAAVKDERAVHAD
1474	DENV-3-NS1	ASLIEVKTCTWPKSH	3.93421
1475	DENV-3-NS1	LIEVKTCTWPKSHTL	0.190435	LIEVKTCTWPKSH
1482	DENV-3-NS1	LWSNGVLESDMIIPK	1.09243	LWSNGVLESDMIIPK
1485	DENV-3-NS1	LESDMIIPKSLAGPI	2.69426	LESDMIIPKSLAGPI
1489	DENV-3-NS1	KSLAGPISQHNHRPG	2.11489
1490	DENV-3-NS1	LAGPISQHNHRPGYH	3.30822	LAGPISQHNHRPG
1492	DENV-3-NS1	ISQHNHRPGYHTQTA	5.17077	ISQHNHRPGYHTQTA
1510	DENV-3-NS1	ITENCGTRGPSLRTT	1.06299	ITENCGTRGPSLRTT
1513	DENV-3-NS1	TRGPSLRTTTVSGKL	0.190435	TRGPSLRTTTVSGKL
1516	DENV-3-NS1	RTTTVSGKLIHEWCC	0.714583
1517	DENV-3-NS1	TTVSGKLIHEWCCRS	2.34177	TTVSGKLIHEWCC
1525	DENV-3-NS1	TLPPLRYMGEDGCWY	0.146704	TLPPLRYMGEDGCWY
1540	DENV-3/4-NS1	KSLVSAGSGSGSGDM	2.0203
1541	DENV-3/4-NS1	LVSAGSGSGSGDMGC	2.14363
1549	DENV-4-NS1	VSWSGRELKCGSGIF	3.53282	VSWSGRELKCGSGIF
1552	DENV-4-NS1	ELKCGSGIFVVDNVH	0.107965
1553	DENV-4-NS1	KCGSGIFVVDNVHTW	0.500997
1554	DENV-4-NS1	GSGIFVVDNVHTWTE	0.807668
1555	DENV-4-NS1	GIFVVDNVHTWTEQY	1.63315	GIFVVDNVH
1557	DENV-4-NS1	VDNVHTWTEQYKFQP	5.35163	VDNVHTWTEQYKFQP
1563	DENV-4-NS1	FQPESPARLASAILN	3.06698	FQPESPARLASAILN
1567	DENV-4-NS1	LASAILNAHKDGVCG	3.30333	LASAILNAHKDGVCG
1575	DENV-4-NS1	RSTTRLENVMWKQIT	2.59673	RSTTRLENVMWKQIT
1581	DENV-4-NS1	QITNELNYVLWEGGH	2.19132	QITNELNYVLWEGGH
1589	DENV-4-NS1	LTVVAGDVKGVLTKG	6.32321	LTVVAGDVKGVLTKG
1598	DENV-4-NS1	LTPPASDLKYSWKTW	5.05304	LTPPASDLKYSWKTW
1608	DENV-4-NS1	FTPEARNSTFLIDGP	5.51154	FTPEARNSTFLIDGP
1610	DENV-4-NS1	ARNSTFLIDGPDTSE	0.84767
1611	DENV-4-NS1	NSTFLIDGPDTSECP	0.439185
1612	DENV-4-NS1	TFLIDGPDTSECPNE	0.646704	TFLIDGPDTSE
1617	DENV-4-NS1	ECPNERRAWNSFEVE	0.066213	ECPNERRAWNSFEVE
1622	DENV-4-NS1	SFEVEDYGFGMFTTN	0.905409	SFEVEDYGFGMFTTN
1626	DENV-4-NS1	FGMFTTNIWMKFREG	0.670852	FGMFTTNIWMKFREG
1667	DENV-4-NS1	LIPKSYAGPFSQHNY	0.697086	LIPKSYAGPFSQHNY
1676	DENV-4-NS1	YATQTVGPWHLGKLE	1.56153	YATQTVGPWHLGKLE
1681	DENV-4-NS1	LGKLEIDFGECPGTT	2.48057
1682	DENV-4-NS1	KLEIDFGECPGTTVT	0.37642	KLEIDFGECPGTT
1695	DENV-4-NS1	LRTTTASGKLVTQWC	2.55666
1696	DENV-4-NS1	TTTASGKLVTQWCCR	3.47452	TTTASGKLVTQWC
1700	DENV-4-NS1	VTQWCCRSCTMPPLR	1.19062	VTQWCCRSCTMPPLR
1703	DENV-4-NS1	RSCTMPPLRFLGEDG	0.575695	RSCTMPPLRFLGEDG
1706	DENV-4-NS1	PLRFLGEDGCWYGME	0.378371	PLRFLGEDGCWYGME
1715	DENV-4-NS1	LSEKEENMVKSQVTA	3.52194	LSEKEENMVKSQVTA
1721	DENV-4-ZIKV-NS1	VTAGSGSGSGDVGCS	0.898135
1734	ZIKV-NS1	TGVFVYNDVEAWRDR	0.486954	TGVFVYNDVEAWRDR
1736	ZIKV-NS1	VYNDVEAWRDRYKYH	0.439185
1737	ZIKV-NS1	NDVEAWRDRYKYHPD	0.623802	NDVEAWRDRYKYH
1749	ZIKV-NS1	KQAWEDGICGISSVS	0.351103	KQAWEDGICGISSVS
1754	ZIKV-NS1	ISSVSRMENIMWRSV	3.95297	ISSVSRMENIMWRSV
1759	ZIKV-NS1	MWRSVEGELNAILEE	0.231667
1760	ZIKV-NS1	RSVEGELNAILEENG	1.95809	RSVEGELNAILEE
1763	ZIKV-NS1	LNAILEENGVQLTVV	4.07453	LNAILEENGVQLTVV
1784	ZIKV-NS1	AWGKSYFVRAAKTNN	0.690435	AWGKSYFVRAAKTNN
1788	ZIKV-NS1	RAAKTNNSFVVDGDT	0.087652	RAAKTNNSFVVDGDT
1790	ZIKV-NS1	TNNSFVVDGDTLKEC	0.345941
1791	ZIKV-NS1	NSFVVDGDTLKECPL	0.190435	NSFVVDGDTLKEC
1807	ZIKV-NS1	FHTSVWLKVREDYSL	0.937264
1808	ZIKV-NS1	TSVWLKVREDYSLEC	0.408485
1809	ZIKV-NS1	VWLKVREDYSLECDP	0.496924
1810	ZIKV-NS1	LKVREDYSLECDPAV	1.05519	LKVREDYSL
1813	ZIKV-NS1	YSLECDPAVIGTAVK	4.79115	YSLECDPAVIGTAVK
1824	ZIKV-NS1	DLGYWIESEKNDTWR	0.231667	DLGYWIESEKNDTWR
1839	ZIKV-NS1	KSHTLWTDGIEESDL	0.270668	KSHTLWTDGIEESDL
1841	ZIKV-NS1	LWTDGIEESDLIIPK	2.31331
1842	ZIKV-NS1	TDGIEESDLIIPKSL	0.496924	TDGIEESDLIIPK
1846	ZIKV-NS1	LIIPKSLAGPLSHHN	0.0503815	LIIPKSLAGPLSHHN
1849	ZIKV-NS1	LAGPLSHHNTREGYR	2.02797	LAGPLSHHNTREGYR
1851	ZIKV-NS1	LSHHNTREGYRTQMK	6.27711	LSHHNTREGYRTQMK
1858	ZIKV-NS1	KGPWHSEELEIRFEE	0.337828	KGPWHSEELEIRFEE
1862	ZIKV-NS1	LEIRFEECPGTKVHV	4.68116	LEIRFEECPGTKVHV
1868	ZIKV-NS1	VHVEETCGTRGPSLR	3.31278	VHVEETCGTRGPSLR
1873	ZIKV-NS1	GPSLRSTTASGRVIE	1.01901
1874	ZIKV-NS1	SLRSTTASGRVIEEW	0.231667
1875	ZIKV-NS1	RSTTASGRVIEEWCC	1.56007	RSTTASGRVIE
1886	ZIKV-NS1	LSFRAKDGCWYGMEI	4.39691	LSFRAKDGCWYGMEI
1898	ZIKV-NS1	LVRSMVTAGSGSGSG	0.0503815

## Sheet: Z13-Z18-Z9
Peptide code	Virus-Protein	Peptides sequence	Intensity	Epitopes sequence	Virus-Protein	Peptides	Epitopes
7	DENV-1-E	IGNRDFVEGLSGATW	0.804827	IGNRDFVEGLSGATW	DENV-1-E	22	15
12	DENV-1-E	SGATWVDVVLEHGSC	0.0916955	SGATWVDVVLEHGSC	DENV-2-E	27	15
14	DENV-1-E	WVDVVLEHGSCVTTM	0.0818811	WVDVVLEHGSCVTTM	DENV-3-E	23	11
23	DENV-1-E	KPTLDIELLKTEVTN	1.99415	KPTLDIELLKTEVTN	DENV-4-E	31	14
35	DENV-1-E	EAKISNTTTDSRCPT	2.74482	EAKISNTTTDSRCPT	ZIKV-E	21	14
37	DENV-1-E	SNTTTDSRCPTQGEA	1.93806	SNTTTDSRCPTQGEA	DENV-1-NS1	24	17
69	DENV-1-E	VQYENLKYSVIVTVH	1.35498	VQYENLKYSVIVTVH	DENV-2-NS1	18	8
71	DENV-1-E	NLKYSVIVTVHTGDQ	1.46784		DENV-3-NS1	20	14
72	DENV-1-E	KYSVIVTVHTGDQHQ	4.136		DENV-4-NS1	18	6
73	DENV-1-E	SVIVTVHTGDQHQVG	3.90415		ZIKV-NS1	20	14
74	DENV-1-E	IVTVHTGDQHQVGNE	3.30305	IVTVHTGDQ	TOTAL	224	128
79	DENV-1-E	QVGNETTEHGTIATI	2.71383
80	DENV-1-E	GNETTEHGTIATITP	1.86825
81	DENV-1-E	ETTEHGTIATITPQA	1.40818
82	DENV-1-E	TEHGTIATITPQAPT	1.57368	TEHGTIATI
95	DENV-1-E	TLDCSPRTGLDFNEM	0.644628	TLDCSPRTGLDFNEM
97	DENV-1-E	SPRTGLDFNEMVLLT	0.392259	SPRTGLDFNEMVLLT
139	DENV-1-E	IQTSGTTTIFAGHLK	0.130946	IQTSGTTTIFAGHLK
160	DENV-1-E	VAETQHGTVLVQVKY	2.99519	VAETQHGTVLVQVKY
175	DENV-1-E	EKGVTQNGRLITANP	0.110933	EKGVTQNGRLITANP
186	DENV-1-E	PVNIETEPPFGESYI	1.07768
187	DENV-1-E	NIETEPPFGESYIVV	2.61824	NIETEPPFGESYI
206	DENV-2-E	IGISNRDFVEGVSGG	1.62782
207	DENV-2-E	ISNRDFVEGVSGGSW	2.47859
208	DENV-2-E	NRDFVEGVSGGSWVD	0.147933	NRDFVEGVSGG
210	DENV-2-E	VEGVSGGSWVDIVLE	0.372181	VEGVSGGSWVDIVLE
221	DENV-2-E	MAKNKPTLDFELIKT	3.5821
222	DENV-2-E	KNKPTLDFELIKTEA	0.669471
223	DENV-2-E	KPTLDFELIKTEAKQ	2.70743
224	DENV-2-E	TLDFELIKTEAKQPA	0.96828	TLDFELIKT
227	DENV-2-E	IKTEAKQPATLRKYC	1.99604	IKTEAKQPATLRKYC
235	DENV-2-E	EAKLTNTTTESRCPT	0.816257	EAKLTNTTTESRCPT
237	DENV-2-E	TNTTTESRCPTQGEP	1.32702	TNTTTESRCPTQGEP
239	DENV-2-E	TESRCPTQGEPSLNE	0.891568
240	DENV-2-E	SRCPTQGEPSLNEEQ	2.09933
241	DENV-2-E	CPTQGEPSLNEEQDK	1.89727
242	DENV-2-E	TQGEPSLNEEQDKRF	1.0976	TQGEPSLNE
246	DENV-2-E	EEQDKRFICKHSMVD	1.36418	EEQDKRFICKHSMVD
274	DENV-2-E	VITPHSGEEHAVGND	0.298566	VITPHSGEEHAVGND
295	DENV-2-E	TMECSPRTGLDFNEM	1.01924	TMECSPRTGLDFNEM
360	DENV-2-E	IAETQHGTIVIRVQY	2.3092	IAETQHGTIVIRVQY
375	DENV-2-E	LEKRHVLGRLITVNP	0.437174	LEKRHVLGRLITVNP
378	DENV-2-E	LGRLITVNPIVTEKD	1.80717	LGRLITVNPIVTEKD
380	DENV-2-E	ITVNPIVTEKDSPVN	0.938764
381	DENV-2-E	VNPIVTEKDSPVNIE	1.31388
382	DENV-2-E	PIVTEKDSPVNIEAE	1.08145
383	DENV-2-E	VTEKDSPVNIEAEPP	2.30647
384	DENV-2-E	EKDSPVNIEAEPPFG	0.694701	EKDSPVN
386	DENV-2-E	PVNIEAEPPFGDSYI	0.628709	PVNIEAEPPFGDSYI
407	DENV-3-E	VGNRDFVEGLSGATW	0.47859	VGNRDFVEGLSGATW
433	DENV-3-E	KLCIEGKITNITTDS	0.322639	KLCIEGKITNITTDS
435	DENV-3-E	EGKITNITTDSRCPT	0.33106
436	DENV-3-E	KITNITTDSRCPTQG	1.27933
437	DENV-3-E	TNITTDSRCPTQGEA	0.892357
438	DENV-3-E	ITTDSRCPTQGEAVL	0.833968	ITTDSRCPT
446	DENV-3-E	EEQDQNYVCKHTYVD	1.99158	EEQDQNYVCKHTYVD
469	DENV-3-E	VQYENLKYTVIITVH	3.00349	VQYENLKYTVIITVH
471	DENV-3-E	NLKYTVIITVHTGDQ	3.16784
472	DENV-3-E	KYTVIITVHTGDQHQ	3.93107
473	DENV-3-E	TVIITVHTGDQHQVG	3.19946
474	DENV-3-E	IITVHTGDQHQVGNE	5.45391	IITVHTGDQ
494	DENV-3-E	GLECSPRTGLDFNEM	0.818063	GLECSPRTGLDFNEM
496	DENV-3-E	SPRTGLDFNEMILLT	0.0618424	SPRTGLDFNEMILLT
555	DENV-3-E	NTFVLKKEVSETQHG	0.138859	NTFVLKKEVSETQHG
559	DENV-3-E	VSETQHGTILIKVEY	2.37472	VSETQHGTILIKVEY
579	DENV-3-E	ITANPVVTKKEEPVN	2.43908
580	DENV-3-E	ANPVVTKKEEPVNIE	0.200101
581	DENV-3-E	PVVTKKEEPVNIEAE	2.57527
582	DENV-3-E	VTKKEEPVNIEAEPP	1.27203
583	DENV-3-E	KKEEPVNIEAEPPFG	1.13796
584	DENV-3-E	EEPVNIEAEPPFGES	3.97751
585	DENV-3-E	PVNIEAEPPFGESNI	1.99472	PVN
606	DENV-4-E	VGNRDFVEGVSGGAW	0.481645	VGNRDFVEGVSGGAW
609	DENV-4-E	VEGVSGGAWVDLVLE	0.121867	VEGVSGGAWVDLVLE
620	DENV-4-E	MAQGKPTLDFELTKT	3.27093
621	DENV-4-E	QGKPTLDFELTKTTA	1.36842
622	DENV-4-E	KPTLDFELTKTTAKE	2.09871
623	DENV-4-E	TLDFELTKTTAKEVA	2.71864	TLDFELTKT
645	DENV-4-E	EEQDQQYICRRDVVD	0.0181019	EEQDQQYICRRDVVD
668	DENV-4-E	VQIENLEYTVVVTVH	3.57946	VQIENLEYTVVVTVH
670	DENV-4-E	NLEYTVVVTVHNGDT	3.42854
671	DENV-4-E	EYTVVVTVHNGDTHA	4.21806
672	DENV-4-E	TVVVTVHNGDTHAVG	3.37918
673	DENV-4-E	VVTVHNGDTHAVGND	4.55633	VVTVHNGDT
678	DENV-4-E	AVGNDTSNHGVTATI	0.871061	AVGNDTSNHGVTATI
683	DENV-4-E	VTATITPRSPSVEVK	0.256548	VTATITPRSPSVEVK
728	DENV-4-E	VTVLGSQEGAMHSAL	2.35087	VTVLGSQEGAMHSAL
733	DENV-4-E	MHSALAGATEVDSGD	0.0719314	MHSALAGATEVDSGD
738	DENV-4-E	VDSGDGNHMFAGHLK	3.51726	VDSGDGNHMFAGHLK
767	DENV-4-E	GAGAPCKVPIEIRDV	0.889789
768	DENV-4-E	GAPCKVPIEIRDVNK	0.933127
769	DENV-4-E	PCKVPIEIRDVNKEK	4.15783
770	DENV-4-E	KVPIEIRDVNKEKVV	0.340058
771	DENV-4-E	PIEIRDVNKEKVVGR	3.72796
772	DENV-4-E	EIRDVNKEKVVGRVI	2.97529	EIRDV
777	DENV-4-E	VGRVISATPLAENTN	0.525582	VGRVISATPLAENTN
779	DENV-4-E	ISATPLAENTNSVTN	0.263596
780	DENV-4-E	ATPLAENTNSVTNIE	2.25054
781	DENV-4-E	PLAENTNSVTNIELE	2.05332
782	DENV-4-E	AENTNSVTNIELEPP	2.92649
783	DENV-4-E	NTNSVTNIELEPPFG	3.85735
784	DENV-4-E	NSVTNIELEPPFGDS	0.124909
785	DENV-4-E	VTNIELEPPFGDSYI	2.59375	VTN
805	ZIKV-E	IGVSNRDFVEGMSGG	0.676508
806	ZIKV-E	VSNRDFVEGMSGGTW	1.8518	VSNRDFVEGMSGG
813	ZIKV-E	WVDVVLEHGGCVTVM	0.927983	WVDVVLEHGGCVTVM
815	ZIKV-E	VLEHGGCVTVMAQDK	1.85034	VLEHGGCVTVMAQDK
826	ZIKV-E	VTTTVSNMAEVRSYC	3.72815	VTTTVSNMAEVRSYC
828	ZIKV-E	VSNMAEVRSYCYEAS	3.31998	VSNMAEVRSYCYEAS
877	ZIKV-E	HSGMIVNDTGHETDE	0.0618424	HSGMIVNDTGHETDE
914	ZIKV-E	PLPWHAGADTGTPHW	0.335768	PLPWHAGADTGTPHW
938	ZIKV-E	AGALEAEMDGAKGRL	0.0412311	AGALEAEMDGAKGRL
961	ZIKV-E	KIPAETLHGTVTVEV	2.91407
962	ZIKV-E	PAETLHGTVTVEVQY	1.68792	PAETLHGTVTVEV
964	ZIKV-E	LHGTVTVEVQYAGTD	2.91416
965	ZIKV-E	GTVTVEVQYAGTDGP	1.44111
966	ZIKV-E	VTVEVQYAGTDGPCK	4.72882	VTVEVQYAGTD
978	ZIKV-E	QTLTPVGRLITANPV	0.79879	QTLTPVGRLITANPV
980	ZIKV-E	PVGRLITANPVITES	1.38652
981	ZIKV-E	GRLITANPVITESTE	1.57754
982	ZIKV-E	LITANPVITESTENS	1.01201
983	ZIKV-E	TANPVITESTENSKM	0.165745	TANPVITES
985	ZIKV-E	VITESTENSKMMLEL	4.92493	VITESTENSKMMLEL
995	ZIKV-E	DSYIVIGVGEKKITH	0.156894	DSYIVIGVGEKKITH
1016	DENV-1-NS1	SGIFVTNEVHTWTEQ	0.683984
1017	DENV-1-NS1	IFVTNEVHTWTEQYK	3.72908
1018	DENV-1-NS1	VTNEVHTWTEQYKFQ	4.14067	VTNEVHTWTEQ
1020	DENV-1-NS1	VHTWTEQYKFQADSP	1.52065	VHTWTEQYKFQADSP
1029	DENV-1-NS1	SAAIGKAWEEGVCGI	2.49965	SAAIGKAWEEGVCGI
1033	DENV-1-NS1	EEGVCGIRSATRLEN	1.30686	EEGVCGIRSATRLEN
1043	DENV-1-NS1	ISNELNHILLENDMK	2.69752	ISNELNHILLENDMK
1047	DENV-1-NS1	LLENDMKFTVVVGDA	0.156894	LLENDMKFTVVVGDA
1072	DENV-1-NS1	QNTTFIIDGPDTPEC	0.995238	QNTTFIIDGPDTPEC
1079	DENV-1-NS1	CPDGQRAWNIWEVED	0.799351
1080	DENV-1-NS1	DGQRAWNIWEVEDYG	0.313348	DGQRAWNIWEVED
1083	DENV-1-NS1	NIWEVEDYGFGVFTT	1.51297
1084	DENV-1-NS1	WEVEDYGFGVFTTNI	0.983856
1085	DENV-1-NS1	VEDYGFGVFTTNIWL	2.73881	VEDYGFGVFTT
1087	DENV-1-NS1	GFGVFTTNIWLKLRD	0.0818811	GFGVFTTNIWLKLRD
1100	DENV-1-NS1	SAAIKDSKAVHADMG	0.264263	SAAIKDSKAVHADMG
1111	DENV-1-NS1	NETWKLARASFIEVK	1.57684	NETWKLARASFIEVK
1113	DENV-1-NS1	KLARASFIEVKTCTW	0.506086
1114	DENV-1-NS1	ARASFIEVKTCTWPK	0.240866	ARASFIEVKTCTW
1133	DENV-1-NS1	ISQHNYRPGYFTQTA	0.337047	ISQHNYRPGYFTQTA
1150	DENV-1-NS1	VVVDEHCGNRGPSLR	1.25574	VVVDEHCGNRGPSLR
1155	DENV-1-NS1	GPSLRTTTVTGKIIH	1.87221
1156	DENV-1-NS1	SLRTTTVTGKIIHEW	0.120362	SLRTTTVTGKIIH
1176	DENV-1-NS1	PVKEKEENLVRSMVS	2.4775	PVKEKEENLVRSMVS
1210	DENV-2-NS1	IQKAHEEGICGIRSV	0.0200134	IQKAHEEGICGIRSV
1263	DENV-2-NS1	SLEVEDYGFGVFTTN	4.02882
1264	DENV-2-NS1	EVEDYGFGVFTTNIW	2.14281	EVEDYGFGVFTTN
1268	DENV-2-NS1	VFTTNIWLKLREKQD	3.73118	VFTTNIWLKLREKQD
1281	DENV-2-NS1	IKDNRAVHADMGYWI	1.68128
1282	DENV-2-NS1	DNRAVHADMGYWIES	0.24875	DNRAVHADMGYWI
1288	DENV-2-NS1	IESALNDTWKMEKAS	1.75288
1290	DENV-2-NS1	LNDTWKMEKASFIEV	0.110933
1291	DENV-2-NS1	DTWKMEKASFIEVKS	1.4124
1292	DENV-2-NS1	WKMEKASFIEVKSCH	1.35532
1293	DENV-2-NS1	MEKASFIEVKSCHWP	0.461862	MEKAS
1325	DENV-2-NS1	DFDFCEGTTVVVTED	0.0818811	DFDFCEGTTVVVTED
1329	DENV-2-NS1	TVVVTEDCEKRGPSL	1.44602
1330	DENV-2-NS1	VVTEDCEKRGPSLRT	3.99848	VVTEDCEKRGPSL
1354	DENV-2-NS1	EIRPLKEKEENLVNS	1.16862
1355	DENV-2-NS1	RPLKEKEENLVNSLV	1.10451
1356	DENV-2-NS1	LKEKEENLVNSLVTA	0.346355	LKEKEENLVNS
1358	DENV-2-NS1	EENLVNSLVTAGSGS	1.65698
1375	DENV-3-NS1	SGIFVTNEVHTWTEQ	1.87857
1376	DENV-3-NS1	IFVTNEVHTWTEQYK	3.70205
1377	DENV-3-NS1	VTNEVHTWTEQYKFQ	3.74025	VTNEVHTWTEQ
1379	DENV-3-NS1	VHTWTEQYKFQADSP	0.39776	VHTWTEQYKFQADSP
1402	DENV-3-NS1	IANELNYILWENNIK	1.97742	IANELNYILWENNIK
1423	DENV-3-NS1	YSWKTWGKAKIVTAE	1.62214	YSWKTWGKAKIVTAE
1425	DENV-3-NS1	TWGKAKIVTAETQNS	0.725851
1426	DENV-3-NS1	GKAKIVTAETQNSSF	0.544911	GKAKIVTAETQNS
1428	DENV-3-NS1	IVTAETQNSSFIIDG	4.13716	IVTAETQNSSFIIDG
1431	DENV-3-NS1	QNSSFIIDGPNTPEC	1.3811
1432	DENV-3-NS1	SSFIIDGPNTPECPS	3.40369	SSFIIDGPNTPEC
1438	DENV-3-NS1	CPSASRAWNVWEVED	0.294324
1439	DENV-3-NS1	SASRAWNVWEVEDYG	0.0916955	SASRAWNVWEVED
1443	DENV-3-NS1	WEVEDYGFGVFTTNI	1.54821
1444	DENV-3-NS1	VEDYGFGVFTTNIWL	1.02031	VEDYGFGVFTTNI
1462	DENV-3-NS1	ERAVHADMGYWIESQ	0.486969	ERAVHADMGYWIESQ
1470	DENV-3-NS1	NGSWKLEKASLIEVK	0.00916591	NGSWKLEKASLIEVK
1492	DENV-3-NS1	ISQHNHRPGYHTQTA	0.0618424	ISQHNHRPGYHTQTA
1509	DENV-3-NS1	VVITENCGTRGPSLR	0.256548	VVITENCGTRGPSLR
1535	DENV-3-NS1	PISEKEENMVKSLVS	0.733633	PISEKEENMVKSLVS
1551	DENV-4-NS1	GRELKCGSGIFVVDN	0.357702
1552	DENV-4-NS1	ELKCGSGIFVVDNVH	1.21212
1553	DENV-4-NS1	KCGSGIFVVDNVHTW	1.08411
1554	DENV-4-NS1	GSGIFVVDNVHTWTE	1.53999
1555	DENV-4-NS1	GIFVVDNVHTWTEQY	1.73046
1556	DENV-4-NS1	FVVDNVHTWTEQYKF	0.208799
1557	DENV-4-NS1	VDNVHTWTEQYKFQP	4.60202	VDN
1581	DENV-4-NS1	QITNELNYVLWEGGH	0.0546722	QITNELNYVLWEGGH
1640	DENV-4-NS1	IKDQKAVHADMGYWI	0.700251	IKDQKAVHADMGYWI
1647	DENV-4-NS1	IESSKNQTWQIERAS	0.0200134
1648	DENV-4-NS1	SSKNQTWQIERASLI	1.24133	SSKNQTWQIERAS
1677	DENV-4-NS1	TQTVGPWHLGKLEID	2.15453	TQTVGPWHLGKLEID
1684	DENV-4-NS1	DFGECPGTTVTIQEN	1.00542
1685	DENV-4-NS1	GECPGTTVTIQENCD	0.709076
1686	DENV-4-NS1	CPGTTVTIQENCDHR	1.72538
1687	DENV-4-NS1	GTTVTIQENCDHRGP	1.31741
1688	DENV-4-NS1	TVTIQENCDHRGPSL	1.18759	TVTIQEN
1717	DENV-4-NS1	EENMVKSQVTAGSGS	0.309819
1719	DENV-4-ZIKV-NS1	VKSQVTAGSGSGSGD	0.174489
1735	ZIKV-NS1	VFVYNDVEAWRDRYK	0.960428
1736	ZIKV-NS1	VYNDVEAWRDRYKYH	3.12318	VYNDVEAWRDRYK
1749	ZIKV-NS1	KQAWEDGICGISSVS	1.77952	KQAWEDGICGISSVS
1751	ZIKV-NS1	EDGICGISSVSRMEN	1.02353
1752	ZIKV-NS1	GICGISSVSRMENIM	0.862668
1753	ZIKV-NS1	CGISSVSRMENIMWR	0.301479
1754	ZIKV-NS1	ISSVSRMENIMWRSV	1.78798	ISSVSRMEN
1768	ZIKV-NS1	QLTVVVGSVKNPMWR	0.812467	QLTVVVGSVKNPMWR
1774	ZIKV-NS1	MWRGPQRLPVPVNEL	0.0412311	MWRGPQRLPVPVNEL
1778	ZIKV-NS1	PVPVNELPHGWKAWG	2.92704
1779	ZIKV-NS1	PVNELPHGWKAWGKS	0.277256	PVNELPHGWKAWG
1790	ZIKV-NS1	TNNSFVVDGDTLKEC	0.0531995
1791	ZIKV-NS1	NSFVVDGDTLKECPL	1.27005	NSFVVDGDTLKEC
1793	ZIKV-NS1	VDGDTLKECPLKHRA	2.42927	VDGDTLKECPLKHRA
1827	ZIKV-NS1	ESEKNDTWRLKRAHL	1.5593	ESEKNDTWRLKRAHL
1834	ZIKV-NS1	LIEMKTCEWPKSHTL	0.156894	LIEMKTCEWPKSHTL
1844	ZIKV-NS1	EESDLIIPKSLAGPL	1.86921	EESDLIIPKSLAGPL
1861	ZIKV-NS1	EELEIRFEECPGTKV	1.05749	EELEIRFEECPGTKV
1863	ZIKV-NS1	IRFEECPGTKVHVEE	0.0916955	IRFEECPGTKVHVEE
1880	ZIKV-NS1	EEWCCRECTMPPLSF	0.240866	EEWCCRECTMPPLSF

## Sheet: Z15-Z14-Z24
Peptide code	Virus-Protein	Peptides sequence	Intensity	Epitopes sequence	Virus-Protein	Peptides	Epitopes
6	DENV-1-E	VGIGNRDFVEGLSGA	0.120157	VGIGNRDFVEGLSGA	DENV-1-E	26	14
38	DENV-1-E	TTTDSRCPTQGEATL	0.827676		DENV-2-E	36	20
39	DENV-1-E	TDSRCPTQGEATLVE	0.892317		DENV-3-E	27	15
40	DENV-1-E	SRCPTQGEATLVEEQ	0.993733		DENV-4-E	29	15
41	DENV-1-E	CPTQGEATLVEEQDA	2.7929		ZIKV-E	20	17
42	DENV-1-E	TQGEATLVEEQDANF	1.01655		DENV-1-NS1	27	15
43	DENV-1-E	GEATLVEEQDANFVC	0.122903		DENV-2-NS1	18	10
44	DENV-1-E	ATLVEEQDANFVCRR	0.48864	ATL	DENV-3-NS1	27	16
67	DENV-1-E	EGKIVQYENLKYSVI	0.0351947	EGKIVQYENLKYSVI	DENV-4-NS1	13	10
82	DENV-1-E	TEHGTIATITPQAPT	2.69967	TEHGTIATITPQAPT	ZIKV-NS1	20	12
89	DENV-1-E	TSEIQLTDYGALTLD	0.578926	TSEIQLTDYGALTLD	TOTAL	243	144
91	DENV-1-E	QLTDYGALTLDCSPR	0.0351947	QLTDYGALTLDCSPR
94	DENV-1-E	ALTLDCSPRTGLDFN	0.120157
95	DENV-1-E	TLDCSPRTGLDFNEM	0.0351947	TLDCSPRTGLDFNEM
97	DENV-1-E	SPRTGLDFNEMVLLT	0.578926
98	DENV-1-E	RTGLDFNEMVLLTMK	0.327676	RTGLDFNEMVLLT
112	DENV-1-E	LPLPWTSGASTSQET	0.461069	LPLPWTSGASTSQET
125	DENV-1-E	TAHAKKQEVVVLGSQ	0.196159	TAHAKKQEVVVLGSQ
135	DENV-1-E	TALTGATEIQTSGTT	0.196159	TALTGATEIQTSGTT
149	DENV-1-E	DKLTLKGMSYVMCTG	3.73178	DKLTLKGMSYVMCTG
154	DENV-1-E	VMCTGSFKLEKEVAE	1.79599
155	DENV-1-E	CTGSFKLEKEVAETQ	1.30011	CTGSFKLEKEVAE
187	DENV-1-E	NIETEPPFGESYIVV	1.1854
188	DENV-1-E	ETEPPFGESYIVVGA	0.196159
189	DENV-1-E	EPPFGESYIVVGAGE	1.42751	EPPFGESYIVV
197	DENV-1-E	ALKLSWFKGSGSGSG	0.703783
198	DENV-1/2-E	KLSWFKGSGSGSGMR	2.09122
199	DENV-1/2-E	SWFKGSGSGSGMRCI	0.48864
207	DENV-2-E	ISNRDFVEGVSGGSW	0.535195	ISNRDFVEGVSGGSW
221	DENV-2-E	MAKNKPTLDFELIKT	0.592586	MAKNKPTLDFELIKT
230	DENV-2-E	QPATLRKYCIEAKLT	1.23135	QPATLRKYCIEAKLT
238	DENV-2-E	TTTESRCPTQGEPSL	0.608797	TTTESRCPTQGEPSL
242	DENV-2-E	TQGEPSLNEEQDKRF	0.857123	TQGEPSLNEEQDKRF
246	DENV-2-E	EEQDKRFICKHSMVD	0.385415	EEQDKRFICKHSMVD
267	DENV-2-E	EGKIVQPENLEYTIV	0.447833	EGKIVQPENLEYTIV
275	DENV-2-E	TPHSGEEHAVGNDTG	2.94783	TPHSGEEHAVGNDTG
285	DENV-2-E	IKITPQSSTTEAELT	0.827676	IKITPQSSTTEAELT
287	DENV-2-E	PQSSTTEAELTGYGT	0.26491
288	DENV-2-E	SSTTEAELTGYGTVT	4.60101
289	DENV-2-E	TTEAELTGYGTVTME	0.120157	TTEAELTGYGT
292	DENV-2-E	TGYGTVTMECSPRTG	4.76514
293	DENV-2-E	YGTVTMECSPRTGLD	1.02383
294	DENV-2-E	TVTMECSPRTGLDFN	3.24045
295	DENV-2-E	TMECSPRTGLDFNEM	0.659158	TMECSPRTG
298	DENV-2-E	RTGLDFNEMVLLQME	0.912638
299	DENV-2-E	GLDFNEMVLLQMEDK	3.34384
300	DENV-2-E	DFNEMVLLQMEDKAW	1.23135
301	DENV-2-E	NEMVLLQMEDKAWLV	1.68599	NEMVLLQME
305	DENV-2-E	EDKAWLVHRQWFLDL	0.0500244	EDKAWLVHRQWFLDL
309	DENV-2-E	RQWFLDLPLPWLPGA	1.08157
310	DENV-2-E	WFLDLPLPWLPGADT	0.512494
311	DENV-2-E	LDLPLPWLPGADTQG	0.26491	LDLPLPWLPGA
326	DENV-2-E	HAKKQDVVVLGSQEG	0.659158	HAKKQDVVVLGSQEG
349	DENV-2-E	DKLQLKGMSYSMCTG	2.8729	DKLQLKGMSYSMCTG
354	DENV-2-E	SMCTGKFKIVKEIAE	3.25328
355	DENV-2-E	CTGKFKIVKEIAETQ	2.78168	CTGKFKIVKEIAE
357	DENV-2-E	FKIVKEIAETQHGTI	0.659158	FKIVKEIAETQHGTI
384	DENV-2-E	EKDSPVNIEAEPPFG	2.13041
385	DENV-2-E	DSPVNIEAEPPFGDS	1.28112
386	DENV-2-E	PVNIEAEPPFGDSYI	0.144888	PVNIEAEPPFG
388	DENV-2-E	EAEPPFGDSYIIVGV	1.73808
389	DENV-2-E	EPPFGDSYIIVGVEP	2.00551
390	DENV-2-E	PFGDSYIIVGVEPGQ	0.98864	PFGDSYIIVGV
397	DENV-2-E	QLKLNWFKGSGSGSG	1.23585
398	DENV-2/3-E	KLNWFKGSGSGSGMR	2.02158
399	DENV-2/3-E	NWFKGSGSGSGMRCV	0.851511
407	DENV-3-E	VGNRDFVEGLSGATW	0.327676	VGNRDFVEGLSGATW
440	DENV-3-E	SRCPTQGEAVLPEEQ	2.80927
441	DENV-3-E	CPTQGEAVLPEEQDQ	2.65535
442	DENV-3-E	TQGEAVLPEEQDQNY	0.824371
443	DENV-3-E	GEAVLPEEQDQNYVC	2.25062
444	DENV-3-E	AVLPEEQDQNYVCKH	0.120157	AVLPEEQ
446	DENV-3-E	EEQDQNYVCKHTYVD	3.09922	EEQDQNYVCKHTYVD
460	DENV-3-E	SLVTCAKFQCLEPIE	0.327676	SLVTCAKFQCLEPIE
488	DENV-3-E	TTEAILPEYGTLGLE	1.27932
489	DENV-3-E	EAILPEYGTLGLECS	0.108032	EAILPEYGTLGLE
496	DENV-3-E	SPRTGLDFNEMILLT	2.70378	SPRTGLDFNEMILLT
507	DENV-3-E	VHRQWFFDLPLPWTS	0.731353
508	DENV-3-E	RQWFFDLPLPWTSGA	0.535195	RQWFFDLPLPWTS
511	DENV-3-E	LPLPWTSGATAETPT	1.65535	LPLPWTSGATAETPT
548	DENV-3-E	DKLELKGMSYAMCTN	4.02289	DKLELKGMSYAMCTN
554	DENV-3-E	CTNTFVLKKEVSETQ	0.196159	CTNTFVLKKEVSETQ
565	DENV-3-E	VEYKGEDAPCKIPFS	0.885068	VEYKGEDAPCKIPFS
567	DENV-3-E	GEDAPCKIPFSTEDG	0.48864	GEDAPCKIPFSTEDG
579	DENV-3-E	ITANPVVTKKEEPVN	0.26491
580	DENV-3-E	ANPVVTKKEEPVNIE	0.578926	ANPVVTKKEEPVN
584	DENV-3-E	EEPVNIEAEPPFGES	3.99421
585	DENV-3-E	PVNIEAEPPFGESNI	1.65535
586	DENV-3-E	NIEAEPPFGESNIVI	0.210057
587	DENV-3-E	EAEPPFGESNIVIGI	1.1779
588	DENV-3-E	EPPFGESNIVIGIGD	1.61412	EPPFGES
592	DENV-3-E	IVIGIGDNALKINWY	0.376812	IVIGIGDNALKINWY
596	DENV-3-E	ALKINWYKGSGSGSG	1.90306
597	DENV-3/4-E	KINWYKGSGSGSGMR	2.59361
645	DENV-4-E	EEQDQQYICRRDVVD	1.80057	EEQDQQYICRRDVVD
666	DENV-4-E	TGNLVQIENLEYTVV	1.18416	TGNLVQIENLEYTVV
674	DENV-4-E	TVHNGDTHAVGNDTS	0.26491	TVHNGDTHAVGNDTS
682	DENV-4-E	HGVTATITPRSPSVE	1.06757
683	DENV-4-E	VTATITPRSPSVEVK	1.07893	VTATITPRSPSVE
689	DENV-4-E	EVKLPDYGELTLDCE	1.65032
690	DENV-4-E	KLPDYGELTLDCEPR	0.294426
691	DENV-4-E	PDYGELTLDCEPRSG	1.44783	PDYGELTLDCE
693	DENV-4-E	ELTLDCEPRSGIDFN	0.508232	ELTLDCEPRSGIDFN
696	DENV-4-E	EPRSGIDFNEMILMK	0.23395	EPRSGIDFNEMILMK
709	DENV-4-E	WFLDLPLPWTTGADT	1.33258
710	DENV-4-E	LDLPLPWTTGADTSE	0.385415
711	DENV-4-E	LPLPWTTGADTSEVH	3.90649
712	DENV-4-E	LPWTTGADTSEVHWN	4.58538
713	DENV-4-E	WTTGADTSEVHWNYK	2.42837
714	DENV-4-E	TGADTSEVHWNYKER	0.0351947	TGADT
732	DENV-4-E	GAMHSALAGATEVDS	4.70936
733	DENV-4-E	MHSALAGATEVDSGD	4.10124
734	DENV-4-E	SALAGATEVDSGDGN	3.1619	SALAGATEVDS
737	DENV-4-E	TEVDSGDGNHMFAGH	5.03057	TEVDSGDGNHMFAGH
757	DENV-4-E	IDKEMAETQHGTTVV	0.327676	IDKEMAETQHGTTVV
767	DENV-4-E	GAGAPCKVPIEIRDV	0.196159	GAGAPCKVPIEIRDV
771	DENV-4-E	PIEIRDVNKEKVVGR	0.48864	PIEIRDVNKEKVVGR
782	DENV-4-E	AENTNSVTNIELEPP	0.196159	AENTNSVTNIELEPP
786	DENV-4-E	NIELEPPFGDSYIVI	0.954286
787	DENV-4-E	ELEPPFGDSYIVIGV	0.595513
788	DENV-4-E	EPPFGDSYIVIGVGN	2.29413
789	DENV-4-E	PFGDSYIVIGVGNSA	1.21445
790	DENV-4-E	GDSYIVIGVGNSALT	0.872952	GDSYIVI
825	ZIKV-E	ELVTTTVSNMAEVRS	1.27932	ELVTTTVSNMAEVRS
827	ZIKV-E	TTVSNMAEVRSYCYE	2.35642	TTVSNMAEVRSYCYE
841	ZIKV-E	TQGEAYLDKQSDTQY	0.731353
842	ZIKV-E	GEAYLDKQSDTQYVC	0.239405	GEAYLDKQSDTQY
845	ZIKV-E	KQSDTQYVCKRTLVD	1.18239	KQSDTQYVCKRTLVD
866	ZIKV-E	TGKSIQPENLEYRIM	1.05739	TGKSIQPENLEYRIM
898	ZIKV-E	CEPRTGLDFSDLYYL	1.58793	CEPRTGLDFSDLYYL
900	ZIKV-E	TGLDFSDLYYLTMNN	1.77083	TGLDFSDLYYLTMNN
909	ZIKV-E	LVHKEWFHDIPLPWH	0.054728	LVHKEWFHDIPLPWH
911	ZIKV-E	EWFHDIPLPWHAGAD	0.620157	EWFHDIPLPWHAGAD
940	ZIKV-E	EAEMDGAKGRLSSGH	3.08848	EAEMDGAKGRLSSGH
951	ZIKV-E	DKLRLKGVSYSLCTA	3.46414	DKLRLKGVSYSLCTA
977	ZIKV-E	DMQTLTPVGRLITAN	0.196159	DMQTLTPVGRLITAN
982	ZIKV-E	LITANPVITESTENS	0.731353	LITANPVITESTENS
986	ZIKV-E	TESTENSKMMLELDP	0.155352	TESTENSKMMLELDP
988	ZIKV-E	ENSKMMLELDPPFGD	0.120157	ENSKMMLELDPPFGD
990	ZIKV-E	MMLELDPPFGDSYIV	0.29448
991	ZIKV-E	LELDPPFGDSYIVIG	0.48864
992	ZIKV-E	LDPPFGDSYIVIGVG	1.25355	LDPPFGDSYIV
995	ZIKV-E	DSYIVIGVGEKKITH	3.23683	DSYIVIGVGEKKITH
1015	DENV-1-NS1	CGSGIFVTNEVHTWT	0.535195	CGSGIFVTNEVHTWT
1027	DENV-1-NS1	PKRLSAAIGKAWEEG	0.694353	PKRLSAAIGKAWEEG
1029	DENV-1-NS1	SAAIGKAWEEGVCGI	1.73585	SAAIGKAWEEGVCGI
1033	DENV-1-NS1	EEGVCGIRSATRLEN	1.05739	EEGVCGIRSATRLEN
1043	DENV-1-NS1	ISNELNHILLENDMK	2.44028
1044	DENV-1-NS1	NELNHILLENDMKFT	3.09871
1045	DENV-1-NS1	LNHILLENDMKFTVV	0.438872	LNHILLENDMK
1051	DENV-1-NS1	TVVVGDANGILAQGK	2.03502	TVVVGDANGILAQGK
1079	DENV-1-NS1	CPDGQRAWNIWEVED	0.240314
1080	DENV-1-NS1	DGQRAWNIWEVEDYG	0.155352	DGQRAWNIWEVED
1083	DENV-1-NS1	NIWEVEDYGFGVFTT	1.43524	NIWEVEDYGFGVFTT
1085	DENV-1-NS1	VEDYGFGVFTTNIWL	0.48864	VEDYGFGVFTTNIWL
1103	DENV-1-NS1	SKAVHADMGYWIESE	0.196159	SKAVHADMGYWIESE
1106	DENV-1-NS1	DMGYWIESEKNETWK	0.26491
1107	DENV-1-NS1	GYWIESEKNETWKLA	1.09259
1108	DENV-1-NS1	WIESEKNETWKLARA	1.02383
1109	DENV-1-NS1	ESEKNETWKLARASF	1.99626
1110	DENV-1-NS1	EKNETWKLARASFIE	4.27026	EKNETWK
1113	DENV-1-NS1	KLARASFIEVKTCTW	0.0189121	KLARASFIEVKTCTW
1144	DENV-1-NS1	LELDFDLCEGTTVVV	0.120157	LELDFDLCEGTTVVV
1153	DENV-1-NS1	CGNRGPSLRTTTVTG	2.77459
1154	DENV-1-NS1	NRGPSLRTTTVTGKI	1.45283
1155	DENV-1-NS1	GPSLRTTTVTGKIIH	2.91779
1156	DENV-1-NS1	SLRTTTVTGKIIHEW	3.85899
1157	DENV-1-NS1	RTTTVTGKIIHEWCC	1.15032
1158	DENV-1-NS1	TTVTGKIIHEWCCRS	3.72484	TTVTG
1168	DENV-1-NS1	LRFRGEDGCWYGMEI	0.327676	LRFRGEDGCWYGMEI
1258	DENV-2-NS1	ECPNTNRAWNSLEVE	0.120157	ECPNTNRAWNSLEVE
1263	DENV-2-NS1	SLEVEDYGFGVFTTN	0.231353
1264	DENV-2-NS1	EVEDYGFGVFTTNIW	3.63985	EVEDYGFGVFTTN
1285	DENV-2-NS1	ADMGYWIESALNDTW	0.196159	ADMGYWIESALNDTW
1290	DENV-2-NS1	LNDTWKMEKASFIEV	6.82333	LNDTWKMEKASFIEV
1306	DENV-2-NS1	ESEMVIPKNFAGPVS	2.47728	ESEMVIPKNFAGPVS
1318	DENV-2-NS1	TQTAGPWHLGKLEMD	3.4676	TQTAGPWHLGKLEMD
1323	DENV-2-NS1	KLEMDFDFCEGTTVV	0.046283
1324	DENV-2-NS1	EMDFDFCEGTTVVVT	1.33413	EMDFDFCEGTTVV
1329	DENV-2-NS1	TVVVTEDCEKRGPSL	2.30113	TVVVTEDCEKRGPSL
1336	DENV-2-NS1	LRTTTASGKLITEWC	1.32768
1337	DENV-2-NS1	TTTASGKLITEWCCR	7.10312
1338	DENV-2-NS1	TASGKLITEWCCRSC	1.94449	TASGKLITEWC
1354	DENV-2-NS1	EIRPLKEKEENLVNS	2.77083
1355	DENV-2-NS1	RPLKEKEENLVNSLV	3.25136
1356	DENV-2-NS1	LKEKEENLVNSLVTA	2.83559	LKEKEENLVNS
1357	DENV-2-NS1	EKEENLVNSLVTAGS	4.17344
1358	DENV-2-NS1	EENLVNSLVTAGSGS	0.659158
1372	DENV-3-NS1	KELKCGSGIFVTNEV	0.148931	KELKCGSGIFVTNEV
1396	DENV-3-NS1	STTRMENLLWKQIAN	0.120157
1397	DENV-3-NS1	TRMENLLWKQIANEL	2.97728
1398	DENV-3-NS1	MENLLWKQIANELNY	0.79399	MENLLWKQIAN
1401	DENV-3-NS1	KQIANELNYILWENN	0.164816	KQIANELNYILWENN
1410	DENV-3-NS1	TVVVGDIIGVLEQGK	2.78142	TVVVGDIIGVLEQGK
1415	DENV-3-NS1	LEQGKRTLTPQPMEL	0.938872	LEQGKRTLTPQPMEL
1419	DENV-3-NS1	TPQPMELKYSWKTWG	1.19435	TPQPMELKYSWKTWG
1428	DENV-3-NS1	IVTAETQNSSFIIDG	3.2425
1429	DENV-3-NS1	TAETQNSSFIIDGPN	1.18954
1430	DENV-3-NS1	ETQNSSFIIDGPNTP	3.31979
1431	DENV-3-NS1	QNSSFIIDGPNTPEC	4.8694
1432	DENV-3-NS1	SSFIIDGPNTPECPS	5.95131	SSFIIDG
1437	DENV-3-NS1	PECPSASRAWNVWEV	0.196159	PECPSASRAWNVWEV
1439	DENV-3-NS1	SASRAWNVWEVEDYG	0.827676	SASRAWNVWEVEDYG
1448	DENV-3-NS1	FTTNIWLKLREVYTQ	2.04165
1449	DENV-3-NS1	TNIWLKLREVYTQLC	3.05831
1450	DENV-3-NS1	IWLKLREVYTQLCDH	0.924069
1451	DENV-3-NS1	LKLREVYTQLCDHRL	0.196159	LKLREVYTQ
1462	DENV-3-NS1	ERAVHADMGYWIESQ	0.796976	ERAVHADMGYWIESQ
1502	DENV-3-NS1	GKLELDFNYCEGTTV	0.316316	GKLELDFNYCEGTTV
1515	DENV-3-NS1	SLRTTTVSGKLIHEW	1.32429	SLRTTTVSGKLIHEW
1517	DENV-3-NS1	TTVSGKLIHEWCCRS	0.438872	TTVSGKLIHEWCCRS
1530	DENV-3-NS1	DGCWYGMEIRPISEK	2.00557
1531	DENV-3-NS1	CWYGMEIRPISEKEE	1.24031
1532	DENV-3-NS1	YGMEIRPISEKEENM	1.64399	YGMEIRPISEK
1535	DENV-3-NS1	PISEKEENMVKSLVS	1.23585	PISEKEENMVKSLVS
1555	DENV-4-NS1	GIFVVDNVHTWTEQY	0.0351947	GIFVVDNVHTWTEQY
1576	DENV-4-NS1	TTRLENVMWKQITNE	4.63632	TTRLENVMWKQITNE
1611	DENV-4-NS1	NSTFLIDGPDTSECP	3.45438	NSTFLIDGPDTSECP
1616	DENV-4-NS1	TSECPNERRAWNSFE	0.0351947
1617	DENV-4-NS1	ECPNERRAWNSFEVE	0.66602	ECPNERRAWNSFE
1622	DENV-4-NS1	SFEVEDYGFGMFTTN	5.14441
1623	DENV-4-NS1	EVEDYGFGMFTTNIW	3.35567	EVEDYGFGMFTTN
1665	DENV-4-NS1	ESQMLIPKSYAGPFS	0.535195	ESQMLIPKSYAGPFS
1677	DENV-4-NS1	TQTVGPWHLGKLEID	0.964185	TQTVGPWHLGKLEID
1688	DENV-4-NS1	TVTIQENCDHRGPSL	0.196159	TVTIQENCDHRGPSL
1696	DENV-4-NS1	TTTASGKLVTQWCCR	6.53068	TTTASGKLVTQWCCR
1706	DENV-4-NS1	PLRFLGEDGCWYGME	0.327676	PLRFLGEDGCWYGME
1716	DENV-4-NS1	EKEENMVKSQVTAGS	0.857123
1723	ZIKV-NS1	SGSGSGDVGCSVDFS	0.542809
1759	ZIKV-NS1	MWRSVEGELNAILEE	0.912638	MWRSVEGELNAILEE
1778	ZIKV-NS1	PVPVNELPHGWKAWG	0.827676	PVPVNELPHGWKAWG
1787	ZIKV-NS1	FVRAAKTNNSFVVDG	1.71387
1788	ZIKV-NS1	RAAKTNNSFVVDGDT	3.49058
1789	ZIKV-NS1	AKTNNSFVVDGDTLK	0.331443
1790	ZIKV-NS1	TNNSFVVDGDTLKEC	4.35676
1791	ZIKV-NS1	NSFVVDGDTLKECPL	6.03363	NSFVVDG
1812	ZIKV-NS1	EDYSLECDPAVIGTA	3.00035	EDYSLECDPAVIGTA
1827	ZIKV-NS1	ESEKNDTWRLKRAHL	3.35472	ESEKNDTWRLKRAHL
1840	ZIKV-NS1	HTLWTDGIEESDLII	0.912638	HTLWTDGIEESDLII
1844	ZIKV-NS1	EESDLIIPKSLAGPL	5.20732	EESDLIIPKSLAGPL
1858	ZIKV-NS1	KGPWHSEELEIRFEE	0.0417022
1859	ZIKV-NS1	PWHSEELEIRFEECP	0.354773	PWHSEELEIRFEE
1861	ZIKV-NS1	EELEIRFEECPGTKV	3.6339	EELEIRFEECPGTKV
1867	ZIKV-NS1	TKVHVEETCGTRGPS	0.0351947	TKVHVEETCGTRGPS
1874	ZIKV-NS1	SLRSTTASGRVIEEW	1.19435
1875	ZIKV-NS1	RSTTASGRVIEEWCC	0.120157
1876	ZIKV-NS1	TTASGRVIEEWCCRE	0.26491	TTASGRVIEEW
1880	ZIKV-NS1	EEWCCRECTMPPLSF	0.912638	EEWCCRECTMPPLSF

## Sheet: Z11-Z26-Z19
Peptide code	Virus-Protein	Peptides sequence	Intensity	Epitopes sequence	Virus-Protein	Peptides	Epitopes
8	DENV-1-E	NRDFVEGLSGATWVD	0.169925	NRDFVEGLSGATWVD	DENV-1-E	16	13
10	DENV-1-E	VEGLSGATWVDVVLE	0.0829623	VEGLSGATWVDVVLE	DENV-2-E	31	17
16	DENV-1-E	VLEHGSCVTTMAKNK	0.169925	VLEHGSCVTTMAKNK	DENV-3-E	22	13
25	DENV-1-E	DIELLKTEVTNPAVL	0.208926	DIELLKTEVTNPAVL	DENV-4-E	37	17
55	DENV-1-E	GNGCGLFGKGSLLTC	1.39232	GNGCGLFGKGSLLTC	ZIKV-E	19	14
67	DENV-1-E	EGKIVQYENLKYSVI	0.562061	EGKIVQYENLKYSVI	DENV-1-NS1	16	12
91	DENV-1-E	QLTDYGALTLDCSPR	0.584963	QLTDYGALTLDCSPR	DENV-2-NS1	16	14
127	DENV-1-E	KKQEVVVLGSQEGAM	0.812626		DENV-3-NS1	15	10
128	DENV-1-E	QEVVVLGSQEGAMHT	1.51186	QEVVVLGSQEGAM	DENV-4-NS1	17	14
130	DENV-1-E	VLGSQEGAMHTALTG	1.39295	VLGSQEGAMHTALTG	ZIKV-NS1	17	11
154	DENV-1-E	VMCTGSFKLEKEVAE	0.749861		TOTAL	206	135
155	DENV-1-E	CTGSFKLEKEVAETQ	0.169925	CTGSFKLEKEVAE
172	DENV-1-E	PFSTQDEKGVTQNGR	2.06713	PFSTQDEKGVTQNGR
186	DENV-1-E	PVNIETEPPFGESYI	2.19331
187	DENV-1-E	NIETEPPFGESYIVV	1.60258	NIETEPPFGESYI
190	DENV-1-E	PFGESYIVVGAGEKA	0.247334	PFGESYIVVGAGEKA
208	DENV-2-E	NRDFVEGVSGGSWVD	1.39243	NRDFVEGVSGGSWVD
216	DENV-2-E	VLEHGSCVTTMAKNK	0.0384078	VLEHGSCVTTMAKNK
233	DENV-2-E	KYCIEAKLTNTTTES	2.26869
234	DENV-2-E	CIEAKLTNTTTESRC	1.0911	CIEAKLTNTTTES
239	DENV-2-E	TESRCPTQGEPSLNE	2.56957
240	DENV-2-E	SRCPTQGEPSLNEEQ	0.576816
241	DENV-2-E	CPTQGEPSLNEEQDK	1.14118
242	DENV-2-E	TQGEPSLNEEQDKRF	0.628694	TQGEPSLNE
267	DENV-2-E	EGKIVQPENLEYTIV	0.346743	TQGEPSLNEEQDKRF
284	DENV-2-E	KEIKITPQSSTTEAE	0.85824
285	DENV-2-E	IKITPQSSTTEAELT	1.2783	IKITPQSSTTEAE
287	DENV-2-E	PQSSTTEAELTGYGT	0.48864	PQSSTTEAELTGYGT
289	DENV-2-E	TTEAELTGYGTVTME	0.169925	TTEAELTGYGTVTME
292	DENV-2-E	TGYGTVTMECSPRTG	2.78456
293	DENV-2-E	YGTVTMECSPRTGLD	0.562061	YGTVTMECSPRTG
297	DENV-2-E	SPRTGLDFNEMVLLQ	0.0849625
298	DENV-2-E	RTGLDFNEMVLLQME	0.0849625	RTGLDFNEMVLLQ
327	DENV-2-E	KKQDVVVLGSQEGAM	2.24575
328	DENV-2-E	QDVVVLGSQEGAMHT	2.19212
329	DENV-2-E	VVVLGSQEGAMHTAL	1.46942
330	DENV-2-E	VLGSQEGAMHTALTG	1.63824	VLGSQEGAM
354	DENV-2-E	SMCTGKFKIVKEIAE	2.97705
355	DENV-2-E	CTGKFKIVKEIAETQ	2.30944	CTGKFKIVKEIAE
370	DENV-2-E	PCKIPFEITDLEKRH	1.00259	PCKIPFEITDLEKRH
372	DENV-2-E	PFEITDLEKRHVLGR	5.47762
373	DENV-2-E	EITDLEKRHVLGRLI	0.513953	EITDLEKRHVLGR
382	DENV-2-E	PIVTEKDSPVNIEAE	1.6359	PIVTEKDSPVNIEAE
386	DENV-2-E	PVNIEAEPPFGDSYI	1.51612	PVNIEAEPPFGDSYI
388	DENV-2-E	EAEPPFGDSYIIVGV	0.377444
389	DENV-2-E	EPPFGDSYIIVGVEP	0.274154
390	DENV-2-E	PFGDSYIIVGVEPGQ	1.74702	PFGDSYIIVGV
408	DENV-3-E	NRDFVEGLSGATWVD	1.59251	NRDFVEGLSGATWVD
460	DENV-3-E	SLVTCAKFQCLEPIE	0.0384078	SLVTCAKFQCLEPIE
466	DENV-3-E	PIEGKVVQYENLKYT	1.91585	PIEGKVVQYENLKYT
488	DENV-3-E	TTEAILPEYGTLGLE	0.513953	TTEAILPEYGTLGLE
496	DENV-3-E	SPRTGLDFNEMILLT	0.0384078	SPRTGLDFNEMILLT
507	DENV-3-E	VHRQWFFDLPLPWTS	0.948923
508	DENV-3-E	RQWFFDLPLPWTSGA	0.669925	RQWFFDLPLPWTS
510	DENV-3-E	FDLPLPWTSGATAET	1.07601	FDLPLPWTSGATAET
526	DENV-3-E	KKQEVVVLGSQEGAM	0.48864
527	DENV-3-E	QEVVVLGSQEGAMHT	2.66169
528	DENV-3-E	VVVLGSQEGAMHTAL	1.21366
529	DENV-3-E	VLGSQEGAMHTALTG	1.97359	VLGSQEGAMHTALTG
565	DENV-3-E	VEYKGEDAPCKIPFS	0.366084
566	DENV-3-E	YKGEDAPCKIPFSTE	0.708926	YKGEDAPCKIPFS
571	DENV-3-E	PFSTEDGQGKAHNGR	1.25676	PFSTEDGQGKAHNGR
577	DENV-3-E	NGRLITANPVVTKKE	0.314678	NGRLITANPVVTKKE
579	DENV-3-E	ITANPVVTKKEEPVN	0.435182
580	DENV-3-E	ANPVVTKKEEPVNIE	1.8693
581	DENV-3-E	PVVTKKEEPVNIEAE	2.77853	PVVTKKEEPVN
584	DENV-3-E	EEPVNIEAEPPFGES	0.523605
585	DENV-3-E	PVNIEAEPPFGESNI	3.67959	PVNIEAEPPFGES
596	DENV-3-E	ALKINWYKGSGSGSG	0.0849625
597	DENV-3/4-E	KINWYKGSGSGSGMR	0.314678
607	DENV-4-E	NRDFVEGVSGGAWVD	1.61277	NRDFVEGVSGGAWVD
615	DENV-4-E	VLEHGGCVTTMAQGK	0.681109	VLEHGGCVTTMAQGK
629	DENV-4-E	EVALLRTYCIEALIS	0.377444
630	DENV-4-E	ALLRTYCIEALISNI	1.29567
631	DENV-4-E	LRTYCIEALISNITT	0.915852	LRTYCIEALIS
642	DENV-4-E	GEPYLKEEQDQQYIC	0.745927
643	DENV-4-E	PYLKEEQDQQYICRR	0.314678	PYLKEEQDQQYIC
664	DENV-4-E	SGKITGNLVQIENLE	0.835383	SGKITGNLVQIENLE
667	DENV-4-E	NLVQIENLEYTVVVT	0.866084	NLVQIENLEYTVVVT
673	DENV-4-E	VVTVHNGDTHAVGND	0.0695896
674	DENV-4-E	TVHNGDTHAVGNDTS	1.61201
675	DENV-4-E	HNGDTHAVGNDTSNH	0.0849625	HNGDTHAVGND
688	DENV-4-E	SVEVKLPDYGELTLD	0.279606
689	DENV-4-E	EVKLPDYGELTLDCE	1.66142
690	DENV-4-E	KLPDYGELTLDCEPR	0.436059
691	DENV-4-E	PDYGELTLDCEPRSG	0.644109	PDYGELTLD
694	DENV-4-E	TLDCEPRSGIDFNEM	0.377444	TLDCEPRSGIDFNEM
725	DENV-4-E	HAKRQDVTVLGSQEG	5.44664
726	DENV-4-E	KRQDVTVLGSQEGAM	4.76904
727	DENV-4-E	QDVTVLGSQEGAMHS	6.07874
728	DENV-4-E	VTVLGSQEGAMHSAL	5.82164	VTVLGSQEG
730	DENV-4-E	GSQEGAMHSALAGAT	2.53154
731	DENV-4-E	QEGAMHSALAGATEV	4.16078
732	DENV-4-E	GAMHSALAGATEVDS	4.12993
733	DENV-4-E	MHSALAGATEVDSGD	3.33563
734	DENV-4-E	SALAGATEVDSGDGN	4.0652	SALAGAT
767	DENV-4-E	GAGAPCKVPIEIRDV	0.245927	GAGAPCKVPIEIRDV
771	DENV-4-E	PIEIRDVNKEKVVGR	3.81609
772	DENV-4-E	EIRDVNKEKVVGRVI	2.50614	EIRDVNKEKVVGR
778	DENV-4-E	RVISATPLAENTNSV	0.281121
779	DENV-4-E	ISATPLAENTNSVTN	1.38828	ISATPLAENTNSV
781	DENV-4-E	PLAENTNSVTNIELE	0.0327815	PLAENTNSVTNIELE
784	DENV-4-E	NSVTNIELEPPFGDS	0.313421	NSVTNIELEPPFGDS
786	DENV-4-E	NIELEPPFGDSYIVI	1.40882
787	DENV-4-E	ELEPPFGDSYIVIGV	1.09873
788	DENV-4-E	EPPFGDSYIVIGVGN	1.00571
789	DENV-4-E	PFGDSYIVIGVGNSA	1.07163	PFGDSYIVI
807	ZIKV-E	NRDFVEGMSGGTWVD	1.626	NRDFVEGMSGGTWVD
815	ZIKV-E	VLEHGGCVTVMAQDK	1.71033	VLEHGGCVTVMAQDK
841	ZIKV-E	TQGEAYLDKQSDTQY	0.254888	TQGEAYLDKQSDTQY
867	ZIKV-E	KSIQPENLEYRIMLS	0.984603	KSIQPENLEYRIMLS
880	ZIKV-E	NDTGHETDENRAKVE	1.50081	NDTGHETDENRAKVE
898	ZIKV-E	CEPRTGLDFSDLYYL	0.335663	CEPRTGLDFSDLYYL
900	ZIKV-E	TGLDFSDLYYLTMNN	0.12337	TGLDFSDLYYLTMNN
929	ZIKV-E	RQTVVVLGSQEGAVH	2.67545
930	ZIKV-E	TVVVLGSQEGAVHTA	1.16356	TVVVLGSQEGAVH
932	ZIKV-E	LGSQEGAVHTALAGA	2.29788	LGSQEGAVHTALAGA
934	ZIKV-E	EGAVHTALAGALEAE	0.385151	EGAVHTALAGALEAE
939	ZIKV-E	ALEAEMDGAKGRLSS	1.25489	ALEAEMDGAKGRLSS
945	ZIKV-E	LSSGHLKCRLKMDKL	1.78253	LSSGHLKCRLKMDKL
978	ZIKV-E	QTLTPVGRLITANPV	2.21017	QTLTPVGRLITANPV
980	ZIKV-E	PVGRLITANPVITES	3.50702
981	ZIKV-E	GRLITANPVITESTE	2.27784
982	ZIKV-E	LITANPVITESTENS	2.87595
983	ZIKV-E	TANPVITESTENSKM	2.7397
984	ZIKV-E	NPVITESTENSKMML	1.52833	NPVITES
1019	DENV-1-NS1	NEVHTWTEQYKFQAD	0.377444	NEVHTWTEQYKFQAD
1028	DENV-1-NS1	RLSAAIGKAWEEGVC	0.0849625	RLSAAIGKAWEEGVC
1033	DENV-1-NS1	EEGVCGIRSATRLEN	0.0849625	EEGVCGIRSATRLEN
1043	DENV-1-NS1	ISNELNHILLENDMK	0.0849625
1044	DENV-1-NS1	NELNHILLENDMKFT	1.13233	NELNHILLENDMK
1072	DENV-1-NS1	QNTTFIIDGPDTPEC	0.930725
1073	DENV-1-NS1	TTFIIDGPDTPECPD	3.04234
1074	DENV-1-NS1	FIIDGPDTPECPDGQ	1.81263	FIIDGPDTPEC
1079	DENV-1-NS1	CPDGQRAWNIWEVED	0.208926
1080	DENV-1-NS1	DGQRAWNIWEVEDYG	0.462406	DGQRAWNIWEVED
1083	DENV-1-NS1	NIWEVEDYGFGVFTT	0.902565	NIWEVEDYGFGVFTT
1085	DENV-1-NS1	VEDYGFGVFTTNIWL	4.25265	VEDYGFGVFTTNIWL
1110	DENV-1-NS1	EKNETWKLARASFIE	1.2163	EKNETWKLARASFIE
1144	DENV-1-NS1	LELDFDLCEGTTVVV	0.627865	LELDFDLCEGTTVVV
1150	DENV-1-NS1	VVVDEHCGNRGPSLR	0.128694	VVVDEHCGNRGPSLR
1176	DENV-1-NS1	PVKEKEENLVRSMVS	2.64265	PVKEKEENLVRSMVS
1192	DENV-2-NS1	NKELKCGSGIFITDN	0.128694	NKELKCGSGIFITDN
1220	DENV-2-NS1	LMWKQITPELNHILS	0.169925	LMWKQITPELNHILS
1224	DENV-2-NS1	ELNHILSENEVKLTI	2.34551
1225	DENV-2-NS1	NHILSENEVKLTIMT	3.47081	NHILSENEVKLTI
1247	DENV-2-NS1	KAKMLSTESHNQTFL	0.435182	KAKMLSTESHNQTFL
1249	DENV-2-NS1	LSTESHNQTFLIDGP	4.22089	LSTESHNQTFLIDGP
1252	DENV-2-NS1	NQTFLIDGPETAECP	0.208926	NQTFLIDGPETAECP
1263	DENV-2-NS1	SLEVEDYGFGVFTTN	0.128694
1264	DENV-2-NS1	EVEDYGFGVFTTNIW	1.41585	EVEDYGFGVFTTN
1290	DENV-2-NS1	LNDTWKMEKASFIEV	4.99109	LNDTWKMEKASFIEV
1305	DENV-2-NS1	VLESEMVIPKNFAGP	1.75175	VLESEMVIPKNFAGP
1310	DENV-2-NS1	NFAGPVSQHNYRPGY	0.0384078	NFAGPVSQHNYRPGY
1312	DENV-2-NS1	PVSQHNYRPGYHTQT	0.128694	PVSQHNYRPGYHTQT
1323	DENV-2-NS1	KLEMDFDFCEGTTVV	0.280849	KLEMDFDFCEGTTVV
1332	DENV-2-NS1	DCEKRGPSLRTTTAS	0.781121	DCEKRGPSLRTTTAS
1359	DENV-2-NS1	NLVNSLVTAGSGSGS	0.245927	NLVNSLVTAGSGSGS
1378	DENV-3-NS1	NEVHTWTEQYKFQAD	0.85853	NEVHTWTEQYKFQAD
1397	DENV-3-NS1	TRMENLLWKQIANEL	1.57441	TRMENLLWKQIANEL
1431	DENV-3-NS1	QNSSFIIDGPNTPEC	0.361602
1432	DENV-3-NS1	SSFIIDGPNTPECPS	3.07354
1433	DENV-3-NS1	FIIDGPNTPECPSAS	0.97359	FIIDGPNTPEC
1438	DENV-3-NS1	CPSASRAWNVWEVED	0.298619
1439	DENV-3-NS1	SASRAWNVWEVEDYG	0.697566	SASRAWNVWEVED
1442	DENV-3-NS1	NVWEVEDYGFGVFTT	0.959573	NVWEVEDYGFGVFTT
1444	DENV-3-NS1	VEDYGFGVFTTNIWL	3.67588	VEDYGFGVFTTNIWL
1448	DENV-3-NS1	FTTNIWLKLREVYTQ	1.92679
1449	DENV-3-NS1	TNIWLKLREVYTQLC	1.60818
1450	DENV-3-NS1	IWLKLREVYTQLCDH	0.435182	IWLKLREVYTQ
1485	DENV-3-NS1	LESDMIIPKSLAGPI	0.435182	LESDMIIPKSLAGPI
1502	DENV-3-NS1	GKLELDFNYCEGTTV	0.435182	GKLELDFNYCEGTTV
1535	DENV-3-NS1	PISEKEENMVKSLVS	4.44737	PISEKEENMVKSLVS
1558	DENV-4-NS1	NVHTWTEQYKFQPES	0.0384078	NVHTWTEQYKFQPES
1582	DENV-4-NS1	TNELNYVLWEGGHDL	0.208926	TNELNYVLWEGGHDL
1584	DENV-4-NS1	NYVLWEGGHDLTVVA	0.208926	NYVLWEGGHDLTVVA
1609	DENV-4-NS1	PEARNSTFLIDGPDT	0.0384078	PEARNSTFLIDGPDT
1611	DENV-4-NS1	NSTFLIDGPDTSECP	1.04234	NSTFLIDGPDTSECP
1622	DENV-4-NS1	SFEVEDYGFGMFTTN	2.93543
1623	DENV-4-NS1	EVEDYGFGMFTTNIW	1.29862	EVEDYGFGMFTTN
1648	DENV-4-NS1	SSKNQTWQIERASLI	1.52058
1649	DENV-4-NS1	KNQTWQIERASLIEV	0.724187	KNQTWQIERASLI
1654	DENV-4-NS1	SLIEVKTCLWPKTHT	0.169925	SLIEVKTCLWPKTHT
1664	DENV-4-NS1	VLESQMLIPKSYAGP	1.64884	VLESQMLIPKSYAGP
1683	DENV-4-NS1	EIDFGECPGTTVTIQ	0.314678	EIDFGECPGTTVTIQ
1709	DENV-4-NS1	EDGCWYGMEIRPLSE	0.128694	EDGCWYGMEIRPLSE
1711	DENV-4-NS1	WYGMEIRPLSEKEEN	0.462406	WYGMEIRPLSEKEEN
1713	DENV-4-NS1	EIRPLSEKEENMVKS	0.257388	EIRPLSEKEENMVKS
1715	DENV-4-NS1	LSEKEENMVKSQVTA	2.18076	LSEKEENMVKSQVTA
1718	DENV-4-NS1	NMVKSQVTAGSGSGS	0.915852
1736	ZIKV-NS1	VYNDVEAWRDRYKYH	0.128694
1737	ZIKV-NS1	NDVEAWRDRYKYHPD	0.777085	NDVEAWRDRYKYH
1758	ZIKV-NS1	NIMWRSVEGELNAIL	3.21547
1759	ZIKV-NS1	MWRSVEGELNAILEE	3.01949
1760	ZIKV-NS1	RSVEGELNAILEENG	2.0054
1761	ZIKV-NS1	VEGELNAILEENGVQ	1.73906	VEGELNAIL
1773	ZIKV-NS1	NPMWRGPQRLPVPVN	0.0384078
1774	ZIKV-NS1	MWRGPQRLPVPVNEL	1.26976	MWRGPQRLPVPVN
1776	ZIKV-NS1	PQRLPVPVNELPHGW	0.683878	PQRLPVPVNELPHGW
1778	ZIKV-NS1	PVPVNELPHGWKAWG	5.58914	PVPVNELPHGWKAWG
1791	ZIKV-NS1	NSFVVDGDTLKECPL	0.33762	NSFVVDGDTLKECPL
1803	ZIKV-NS1	VEDHGFGVFHTSVWL	1.70833	VEDHGFGVFHTSVWL
1808	ZIKV-NS1	TSVWLKVREDYSLEC	0.0849625	TSVWLKVREDYSLEC
1811	ZIKV-NS1	VREDYSLECDPAVIG	1.89243	VREDYSLECDPAVIG
1856	ZIKV-NS1	RTQMKGPWHSEELEI	0.377444	RTQMKGPWHSEELEI
1879	ZIKV-NS1	VIEEWCCRECTMPPL	0.0384078	VIEEWCCRECTMPPL
1897	ZIKV-NS1	SNLVRSMVTAGSGSG	0.245927

[truncated: 2 more sheets: Z10-Z20-Z21, Z22-Z23-Z25-Z28]
