# Supplementary material for: Linear epitope mapping in the E and NS1 proteins of dengue and Zika viruses: Prospection of peptides for vaccines and diagnostics
Source: PLoS One. 2023 Oct 3;18(10):e0292451. doi: 10.1371/journal.pone.0292451 (PMC10547212; doi:10.1371/journal.pone.0292451)
Supplement: S3 Table — (XLSX) [file pone.0292451.s004.xlsx]

## Sheet: Epitope hot spots - Tabela 1
Peptide code	Virus-Protein	Sequence	Detection rate (%)	Peptide code	Virus-Protein	Peptides	Detection rate (%)	Peptide code	Virus-Protein	Sequence	Detection rate (%)	Peptide code	Virus-Protein	Sequence	Detection rate (%)	Peptide code	Virus-Protein	Sequence	Detection rate (%)
1	DENV-1-E	GSGSGSGMRCVGIGN	20	201	DENV-2-E	GSGSGSGMRCIGISN	6.66667	401	DENV-3-E	GSGSGSGMRCVGVGN	6.66667	601	DENV-4-E	GSGSGSGMRCVGVGN	6.66667	800	ZIKV-E	GSGSGSGMRCIGVSN	0
2	DENV-1-E	GSGSGMRCVGIGNRD	0	202	DENV-2-E	GSGSGMRCIGISNRD	6.66667	402	DENV-3-E	GSGSGMRCVGVGNRD	0	602	DENV-4-E	GSGSGMRCVGVGNRD	0	801	ZIKV-E	GSGSGMRCIGVSNRD	6.66667
3	DENV-1-E	GSGMRCVGIGNRDFV	6.66667	203	DENV-2-E	GSGMRCIGISNRDFV	26.6667	403	DENV-3-E	GSGMRCVGVGNRDFV	6.66667	603	DENV-4-E	GSGMRCVGVGNRDFV	6.66667	802	ZIKV-E	GSGMRCIGVSNRDFV	26.6667
4	DENV-1-E	GMRCVGIGNRDFVEG	20	204	DENV-2-E	GMRCIGISNRDFVEG	40	404	DENV-3-E	GMRCVGVGNRDFVEG	20	604	DENV-4-E	GMRCVGVGNRDFVEG	0	803	ZIKV-E	GMRCIGVSNRDFVEG	40
5	DENV-1-E	RCVGIGNRDFVEGLS	20	205	DENV-2-E	RCIGISNRDFVEGVS	60	405	DENV-3-E	RCVGVGNRDFVEGLS	6.66667	605	DENV-4-E	RCVGVGNRDFVEGVS	0	804	ZIKV-E	RCIGVSNRDFVEGMS	13.3333
6	DENV-1-E	VGIGNRDFVEGLSGA	6.66667	206	DENV-2-E	IGISNRDFVEGVSGG	46.6667	406	DENV-3-E	VGVGNRDFVEGLSGA	6.66667	606	DENV-4-E	VGVGNRDFVEGVSGG	20	805	ZIKV-E	IGVSNRDFVEGMSGG	26.6667
7	DENV-1-E	IGNRDFVEGLSGATW	26.6667	207	DENV-2-E	ISNRDFVEGVSGGSW	53.3333	407	DENV-3-E	VGNRDFVEGLSGATW	33.3333	607	DENV-4-E	VGNRDFVEGVSGGAW	26.6667	806	ZIKV-E	VSNRDFVEGMSGGTW	26.6667
8	DENV-1-E	NRDFVEGLSGATWVD	46.6667	208	DENV-2-E	NRDFVEGVSGGSWVD	66.6667	408	DENV-3-E	NRDFVEGLSGATWVD	46.6667	608	DENV-4-E	NRDFVEGVSGGAWVD	40	807	ZIKV-E	NRDFVEGMSGGTWVD	40
9	DENV-1-E	DFVEGLSGATWVDVV	66.6667	209	DENV-2-E	DFVEGVSGGSWVDIV	60	409	DENV-3-E	DFVEGLSGATWVDVV	20	609	DENV-4-E	DFVEGVSGGAWVDLV	46.6667	808	ZIKV-E	DFVEGMSGGTWVDVV	26.6667
10	DENV-1-E	VEGLSGATWVDVVLE	46.6667	210	DENV-2-E	VEGVSGGSWVDIVLE	53.3333	410	DENV-3-E	VEGLSGATWVDVVLE	13.3333	610	DENV-4-E	VEGVSGGAWVDLVLE	40	809	ZIKV-E	VEGMSGGTWVDVVLE	40
11	DENV-1-E	GLSGATWVDVVLEHG	33.3333	211	DENV-2-E	GVSGGSWVDIVLEHG	40	411	DENV-3-E	GLSGATWVDVVLEHG	46.6667	611	DENV-4-E	GVSGGAWVDLVLEHG	33.3333	810	ZIKV-E	GMSGGTWVDVVLEHG	26.6667
12	DENV-1-E	SGATWVDVVLEHGSC	60	212	DENV-2-E	SGGSWVDIVLEHGSC	46.6667	412	DENV-3-E	SGATWVDVVLEHGGC	53.3333	612	DENV-4-E	SGGAWVDLVLEHGGC	40	811	ZIKV-E	SGGTWVDVVLEHGGC	40
13	DENV-1-E	ATWVDVVLEHGSCVT	26.6667	213	DENV-2-E	GSWVDIVLEHGSCVT	40	413	DENV-3-E	ATWVDVVLEHGGCVT	26.6667	613	DENV-4-E	GAWVDLVLEHGGCVT	13.3333	812	ZIKV-E	GTWVDVVLEHGGCVT	26.6667
14	DENV-1-E	WVDVVLEHGSCVTTM	53.3333	214	DENV-2-E	WVDIVLEHGSCVTTM	53.3333	414	DENV-3-E	WVDVVLEHGGCVTTM	33.3333	614	DENV-4-E	WVDLVLEHGGCVTTM	26.6667	813	ZIKV-E	WVDVVLEHGGCVTVM	46.6667
15	DENV-1-E	DVVLEHGSCVTTMAK	20	215	DENV-2-E	DIVLEHGSCVTTMAK	6.66667	415	DENV-3-E	DVVLEHGGCVTTMAK	13.3333	615	DENV-4-E	DLVLEHGGCVTTMAQ	13.3333	814	ZIKV-E	DVVLEHGGCVTVMAQ	26.6667
16	DENV-1-E	VLEHGSCVTTMAKNK	0	216	DENV-2-E	VLEHGSCVTTMAKNK	0	416	DENV-3-E	VLEHGGCVTTMAKNK	0	616	DENV-4-E	VLEHGGCVTTMAQGK	0	815	ZIKV-E	VLEHGGCVTVMAQDK	33.3333
17	DENV-1-E	EHGSCVTTMAKNKPT	6.66667	217	DENV-2-E	EHGSCVTTMAKNKPT	6.66667	417	DENV-3-E	EHGGCVTTMAKNKPT	13.3333	617	DENV-4-E	EHGGCVTTMAQGKPT	6.66667	816	ZIKV-E	EHGGCVTVMAQDKPT	26.6667
18	DENV-1-E	GSCVTTMAKNKPTLD	6.66667	218	DENV-2-E	GSCVTTMAKNKPTLD	6.66667	418	DENV-3-E	GGCVTTMAKNKPTLD	6.66667	618	DENV-4-E	GGCVTTMAQGKPTLD	6.66667	817	ZIKV-E	GGCVTVMAQDKPTVD	26.6667
19	DENV-1-E	CVTTMAKNKPTLDIE	20	219	DENV-2-E	CVTTMAKNKPTLDFE	20	419	DENV-3-E	CVTTMAKNKPTLDIE	26.6667	619	DENV-4-E	CVTTMAQGKPTLDFE	20	818	ZIKV-E	CVTVMAQDKPTVDIE	13.3333
20	DENV-1-E	TTMAKNKPTLDIELL	20	220	DENV-2-E	TTMAKNKPTLDFELI	46.6667	420	DENV-3-E	TTMAKNKPTLDIELQ	46.6667	620	DENV-4-E	TTMAQGKPTLDFELT	46.6667	819	ZIKV-E	TVMAQDKPTVDIELV	13.3333
21	DENV-1-E	MAKNKPTLDIELLKT	40	221	DENV-2-E	MAKNKPTLDFELIKT	46.6667	421	DENV-3-E	MAKNKPTLDIELQKT	26.6667	621	DENV-4-E	MAQGKPTLDFELTKT	60	820	ZIKV-E	MAQDKPTVDIELVTT	13.3333
22	DENV-1-E	KNKPTLDIELLKTEV	20	222	DENV-2-E	KNKPTLDFELIKTEA	53.3333	422	DENV-3-E	KNKPTLDIELQKTEA	26.6667	622	DENV-4-E	QGKPTLDFELTKTTA	53.3333	821	ZIKV-E	QDKPTVDIELVTTTV	13.3333
23	DENV-1-E	KPTLDIELLKTEVTN	40	223	DENV-2-E	KPTLDFELIKTEAKQ	53.3333	423	DENV-3-E	KPTLDIELQKTEATQ	33.3333	623	DENV-4-E	KPTLDFELTKTTAKE	46.6667	822	ZIKV-E	KPTVDIELVTTTVSN	6.66667
24	DENV-1-E	TLDIELLKTEVTNPA	20	224	DENV-2-E	TLDFELIKTEAKQPA	53.3333	424	DENV-3-E	TLDIELQKTEATQLA	40	624	DENV-4-E	TLDFELTKTTAKEVA	66.6667	823	ZIKV-E	TVDIELVTTTVSNMA	13.3333
25	DENV-1-E	DIELLKTEVTNPAVL	20	225	DENV-2-E	DFELIKTEAKQPATL	33.3333	425	DENV-3-E	DIELQKTEATQLATL	26.6667	625	DENV-4-E	DFELTKTTAKEVALL	53.3333	824	ZIKV-E	DIELVTTTVSNMAEV	13.3333
26	DENV-1-E	ELLKTEVTNPAVLRK	20	226	DENV-2-E	ELIKTEAKQPATLRK	20	426	DENV-3-E	ELQKTEATQLATLRK	26.6667	626	DENV-4-E	ELTKTTAKEVALLRT	26.6667	825	ZIKV-E	ELVTTTVSNMAEVRS	46.6667
27	DENV-1-E	LKTEVTNPAVLRKLC	6.66667	227	DENV-2-E	IKTEAKQPATLRKYC	20	427	DENV-3-E	QKTEATQLATLRKLC	0	627	DENV-4-E	TKTTAKEVALLRTYC	26.6667	826	ZIKV-E	VTTTVSNMAEVRSYC	40
28	DENV-1-E	TEVTNPAVLRKLCIE	13.3333	228	DENV-2-E	TEAKQPATLRKYCIE	20	428	DENV-3-E	TEATQLATLRKLCIE	6.66667	628	DENV-4-E	TTAKEVALLRTYCIE	26.6667	827	ZIKV-E	TTVSNMAEVRSYCYE	20
29	DENV-1-E	VTNPAVLRKLCIEAK	0	229	DENV-2-E	AKQPATLRKYCIEAK	0	429	DENV-3-E	ATQLATLRKLCIEGK	0	629	DENV-4-E	AKEVALLRTYCIEAL	13.3333	828	ZIKV-E	VSNMAEVRSYCYEAS	40
30	DENV-1-E	NPAVLRKLCIEAKIS	6.66667	230	DENV-2-E	QPATLRKYCIEAKLT	0	430	DENV-3-E	QLATLRKLCIEGKIT	0	630	DENV-4-E	EVALLRTYCIEALIS	60	829	ZIKV-E	NMAEVRSYCYEASIS	26.6667
31	DENV-1-E	AVLRKLCIEAKISNT	6.66667	231	DENV-2-E	ATLRKYCIEAKLTNT	6.66667	431	DENV-3-E	ATLRKLCIEGKITNI	13.3333	631	DENV-4-E	ALLRTYCIEALISNI	33.3333	830	ZIKV-E	AEVRSYCYEASISDM	40
32	DENV-1-E	LRKLCIEAKISNTTT	40	232	DENV-2-E	LRKYCIEAKLTNTTT	40	432	DENV-3-E	LRKLCIEGKITNITT	26.6667	632	DENV-4-E	LRTYCIEALISNITT	13.3333	831	ZIKV-E	VRSYCYEASISDMAS	6.66667
33	DENV-1-E	KLCIEAKISNTTTDS	40	233	DENV-2-E	KYCIEAKLTNTTTES	46.6667	433	DENV-3-E	KLCIEGKITNITTDS	40	633	DENV-4-E	TYCIEALISNITTAT	13.3333	832	ZIKV-E	SYCYEASISDMASDS	33.3333
34	DENV-1-E	CIEAKISNTTTDSRC	33.3333	234	DENV-2-E	CIEAKLTNTTTESRC	26.6667	434	DENV-3-E	CIEGKITNITTDSRC	26.6667	634	DENV-4-E	CIEALISNITTATRC	13.3333	833	ZIKV-E	CYEASISDMASDSRC	6.66667
35	DENV-1-E	EAKISNTTTDSRCPT	53.3333	235	DENV-2-E	EAKLTNTTTESRCPT	26.6667	435	DENV-3-E	EGKITNITTDSRCPT	26.6667	635	DENV-4-E	EALISNITTATRCPT	13.3333	834	ZIKV-E	EASISDMASDSRCPT	40
36	DENV-1-E	KISNTTTDSRCPTQG	20	236	DENV-2-E	KLTNTTTESRCPTQG	13.3333	436	DENV-3-E	KITNITTDSRCPTQG	13.3333	636	DENV-4-E	LISNITTATRCPTQG	0	835	ZIKV-E	SISDMASDSRCPTQG	26.6667
37	DENV-1-E	SNTTTDSRCPTQGEA	6.66667	237	DENV-2-E	TNTTTESRCPTQGEP	26.6667	437	DENV-3-E	TNITTDSRCPTQGEA	20	637	DENV-4-E	SNITTATRCPTQGEP	20	836	ZIKV-E	SDMASDSRCPTQGEA	6.66667
38	DENV-1-E	TTTDSRCPTQGEATL	6.66667	238	DENV-2-E	TTTESRCPTQGEPSL	13.3333	438	DENV-3-E	ITTDSRCPTQGEAVL	26.6667	638	DENV-4-E	ITTATRCPTQGEPYL	13.3333	837	ZIKV-E	MASDSRCPTQGEAYL	6.66667
39	DENV-1-E	TDSRCPTQGEATLVE	20	239	DENV-2-E	TESRCPTQGEPSLNE	53.3333	439	DENV-3-E	TDSRCPTQGEAVLPE	26.6667	639	DENV-4-E	TATRCPTQGEPYLKE	20	838	ZIKV-E	SDSRCPTQGEAYLDK	40
40	DENV-1-E	SRCPTQGEATLVEEQ	13.3333	240	DENV-2-E	SRCPTQGEPSLNEEQ	40	440	DENV-3-E	SRCPTQGEAVLPEEQ	26.6667	640	DENV-4-E	TRCPTQGEPYLKEEQ	6.66667	839	ZIKV-E	SRCPTQGEAYLDKQS	0
41	DENV-1-E	CPTQGEATLVEEQDA	20	241	DENV-2-E	CPTQGEPSLNEEQDK	46.6667	441	DENV-3-E	CPTQGEAVLPEEQDQ	26.6667	641	DENV-4-E	CPTQGEPYLKEEQDQ	6.66667	840	ZIKV-E	CPTQGEAYLDKQSDT	26.6667
42	DENV-1-E	TQGEATLVEEQDANF	13.3333	242	DENV-2-E	TQGEPSLNEEQDKRF	66.6667	442	DENV-3-E	TQGEAVLPEEQDQNY	26.6667	642	DENV-4-E	TQGEPYLKEEQDQQY	0	841	ZIKV-E	TQGEAYLDKQSDTQY	26.6667
43	DENV-1-E	GEATLVEEQDANFVC	20	243	DENV-2-E	GEPSLNEEQDKRFIC	40	443	DENV-3-E	GEAVLPEEQDQNYVC	53.3333	643	DENV-4-E	GEPYLKEEQDQQYIC	46.6667	842	ZIKV-E	GEAYLDKQSDTQYVC	26.6667
44	DENV-1-E	ATLVEEQDANFVCRR	0	244	DENV-2-E	PSLNEEQDKRFICKH	13.3333	444	DENV-3-E	AVLPEEQDQNYVCKH	6.66667	644	DENV-4-E	PYLKEEQDQQYICRR	0	843	ZIKV-E	AYLDKQSDTQYVCKR	6.66667
45	DENV-1-E	LVEEQDANFVCRRTF	13.3333	245	DENV-2-E	LNEEQDKRFICKHSM	6.66667	445	DENV-3-E	LPEEQDQNYVCKHTY	6.66667	645	DENV-4-E	LKEEQDQQYICRRDV	20	844	ZIKV-E	LDKQSDTQYVCKRTL	6.66667
46	DENV-1-E	EEQDANFVCRRTFVD	20	246	DENV-2-E	EEQDKRFICKHSMVD	20	446	DENV-3-E	EEQDQNYVCKHTYVD	40	646	DENV-4-E	EEQDQQYICRRDVVD	33.3333	845	ZIKV-E	KQSDTQYVCKRTLVD	6.66667
47	DENV-1-E	QDANFVCRRTFVDRG	0	247	DENV-2-E	QDKRFICKHSMVDRG	6.66667	447	DENV-3-E	QDQNYVCKHTYVDRG	0	647	DENV-4-E	QDQQYICRRDVVDRG	26.6667	846	ZIKV-E	SDTQYVCKRTLVDRG	0
48	DENV-1-E	ANFVCRRTFVDRGWG	0	248	DENV-2-E	KRFICKHSMVDRGWG	0	448	DENV-3-E	QNYVCKHTYVDRGWG	0	648	DENV-4-E	QQYICRRDVVDRGWG	13.3333	847	ZIKV-E	TQYVCKRTLVDRGWG	6.66667
49	DENV-1-E	FVCRRTFVDRGWGNG	0	249	DENV-2-E	FICKHSMVDRGWGNG	0	449	DENV-3-E	YVCKHTYVDRGWGNG	6.66667	649	DENV-4-E	YICRRDVVDRGWGNG	6.66667	848	ZIKV-E	YVCKRTLVDRGWGNG	0
50	DENV-1-E	CRRTFVDRGWGNGCG	13.3333	250	DENV-2-E	CKHSMVDRGWGNGCG	6.66667	450	DENV-3-E	CKHTYVDRGWGNGCG	13.3333	650	DENV-4-E	CRRDVVDRGWGNGCG	6.66667	849	ZIKV-E	CKRTLVDRGWGNGCG	6.66667
51	DENV-1-E	RTFVDRGWGNGCGLF	26.6667	251	DENV-2-E	HSMVDRGWGNGCGLF	6.66667	451	DENV-3-E	HTYVDRGWGNGCGLF	20	651	DENV-4-E	RDVVDRGWGNGCGLF	26.6667	850	ZIKV-E	RTLVDRGWGNGCGLF	26.6667
52	DENV-1-E	FVDRGWGNGCGLFGK	0	252	DENV-2-E	MVDRGWGNGCGLFGK	6.66667	452	DENV-3-E	YVDRGWGNGCGLFGK	6.66667	652	DENV-4-E	VVDRGWGNGCGLFGK	0	851	ZIKV-E	LVDRGWGNGCGLFGK	0
53	DENV-1-E	DRGWGNGCGLFGKGS	6.66667	253	DENV-2-E	DRGWGNGCGLFGKGG	6.66667	453	DENV-3-E	DRGWGNGCGLFGKGS	0	653	DENV-4-E	DRGWGNGCGLFGKGG	0	852	ZIKV-E	DRGWGNGCGLFGKGS	0
54	DENV-1-E	GWGNGCGLFGKGSLL	6.66667	254	DENV-2-E	GWGNGCGLFGKGGIV	13.3333	454	DENV-3-E	GWGNGCGLFGKGSLV	13.3333	654	DENV-4-E	GWGNGCGLFGKGGVV	13.3333	853	ZIKV-E	GWGNGCGLFGKGSLV	13.3333
55	DENV-1-E	GNGCGLFGKGSLLTC	6.66667	255	DENV-2-E	GNGCGLFGKGGIVTC	0	455	DENV-3-E	GNGCGLFGKGSLVTC	6.66667	655	DENV-4-E	GNGCGLFGKGGVVTC	0	854	ZIKV-E	GNGCGLFGKGSLVTC	6.66667
56	DENV-1-E	GCGLFGKGSLLTCAK	0	256	DENV-2-E	GCGLFGKGGIVTCAM	13.3333	456	DENV-3-E	GCGLFGKGSLVTCAK	0	656	DENV-4-E	GCGLFGKGGVVTCAK	0	855	ZIKV-E	GCGLFGKGSLVTCAK	0
57	DENV-1-E	GLFGKGSLLTCAKFK	6.66667	257	DENV-2-E	GLFGKGGIVTCAMFT	0	457	DENV-3-E	GLFGKGSLVTCAKFQ	0	657	DENV-4-E	GLFGKGGVVTCAKFS	0	856	ZIKV-E	GLFGKGSLVTCAKFA	0
58	DENV-1-E	FGKGSLLTCAKFKCV	6.66667	258	DENV-2-E	FGKGGIVTCAMFTCK	0	458	DENV-3-E	FGKGSLVTCAKFQCL	0	658	DENV-4-E	FGKGGVVTCAKFSCS	0	857	ZIKV-E	FGKGSLVTCAKFACS	0
59	DENV-1-E	KGSLLTCAKFKCVTK	0	259	DENV-2-E	KGGIVTCAMFTCKKN	0	459	DENV-3-E	KGSLVTCAKFQCLEP	6.66667	659	DENV-4-E	KGGVVTCAKFSCSGK	0	858	ZIKV-E	KGSLVTCAKFACSKK	0
60	DENV-1-E	SLLTCAKFKCVTKLE	13.3333	260	DENV-2-E	GIVTCAMFTCKKNME	6.66667	460	DENV-3-E	SLVTCAKFQCLEPIE	33.3333	660	DENV-4-E	GVVTCAKFSCSGKIT	0	859	ZIKV-E	SLVTCAKFACSKKMT	0
61	DENV-1-E	LTCAKFKCVTKLEGK	20	261	DENV-2-E	VTCAMFTCKKNMEGK	0	461	DENV-3-E	VTCAKFQCLEPIEGK	13.3333	661	DENV-4-E	VTCAKFSCSGKITGN	13.3333	860	ZIKV-E	VTCAKFACSKKMTGK	6.66667
62	DENV-1-E	CAKFKCVTKLEGKIV	6.66667	262	DENV-2-E	CAMFTCKKNMEGKIV	13.3333	462	DENV-3-E	CAKFQCLEPIEGKVV	6.66667	662	DENV-4-E	CAKFSCSGKITGNLV	13.3333	861	ZIKV-E	CAKFACSKKMTGKSI	0
63	DENV-1-E	KFKCVTKLEGKIVQY	6.66667	263	DENV-2-E	MFTCKKNMEGKIVQP	0	463	DENV-3-E	KFQCLEPIEGKVVQY	20	663	DENV-4-E	KFSCSGKITGNLVQI	20	862	ZIKV-E	KFACSKKMTGKSIQP	0
64	DENV-1-E	KCVTKLEGKIVQYEN	13.3333	264	DENV-2-E	TCKKNMEGKIVQPEN	0	464	DENV-3-E	QCLEPIEGKVVQYEN	13.3333	664	DENV-4-E	SCSGKITGNLVQIEN	46.6667	863	ZIKV-E	ACSKKMTGKSIQPEN	6.66667
65	DENV-1-E	VTKLEGKIVQYENLK	0	265	DENV-2-E	KKNMEGKIVQPENLE	26.6667	465	DENV-3-E	LEPIEGKVVQYENLK	13.3333	665	DENV-4-E	SGKITGNLVQIENLE	66.6667	864	ZIKV-E	SKKMTGKSIQPENLE	20
66	DENV-1-E	KLEGKIVQYENLKYS	13.3333	266	DENV-2-E	NMEGKIVQPENLEYT	46.6667	466	DENV-3-E	PIEGKVVQYENLKYT	40	666	DENV-4-E	KITGNLVQIENLEYT	40	865	ZIKV-E	KMTGKSIQPENLEYR	13.3333
67	DENV-1-E	EGKIVQYENLKYSVI	53.3333	267	DENV-2-E	EGKIVQPENLEYTIV	60	467	DENV-3-E	EGKVVQYENLKYTVI	46.6667	667	DENV-4-E	TGNLVQIENLEYTVV	73.3333	866	ZIKV-E	TGKSIQPENLEYRIM	33.3333
68	DENV-1-E	KIVQYENLKYSVIVT	6.66667	268	DENV-2-E	KIVQPENLEYTIVIT	46.6667	468	DENV-3-E	KVVQYENLKYTVIIT	6.66667	668	DENV-4-E	NLVQIENLEYTVVVT	53.3333	867	ZIKV-E	KSIQPENLEYRIMLS	33.3333
69	DENV-1-E	VQYENLKYSVIVTVH	26.6667	269	DENV-2-E	VQPENLEYTIVITPH	13.3333	469	DENV-3-E	VQYENLKYTVIITVH	33.3333	669	DENV-4-E	VQIENLEYTVVVTVH	46.6667	868	ZIKV-E	IQPENLEYRIMLSVH	6.66667
70	DENV-1-E	YENLKYSVIVTVHTG	13.3333	270	DENV-2-E	PENLEYTIVITPHSG	13.3333	470	DENV-3-E	YENLKYTVIITVHTG	20	670	DENV-4-E	IENLEYTVVVTVHNG	26.6667	869	ZIKV-E	PENLEYRIMLSVHGS	0
71	DENV-1-E	NLKYSVIVTVHTGDQ	33.3333	271	DENV-2-E	NLEYTIVITPHSGEE	20	471	DENV-3-E	NLKYTVIITVHTGDQ	40	671	DENV-4-E	NLEYTVVVTVHNGDT	60	870	ZIKV-E	NLEYRIMLSVHGSQH	26.6667
72	DENV-1-E	KYSVIVTVHTGDQHQ	40	272	DENV-2-E	EYTIVITPHSGEEHA	33.3333	472	DENV-3-E	KYTVIITVHTGDQHQ	40	672	DENV-4-E	EYTVVVTVHNGDTHA	46.6667	871	ZIKV-E	EYRIMLSVHGSQHSG	13.3333
73	DENV-1-E	SVIVTVHTGDQHQVG	40	273	DENV-2-E	TIVITPHSGEEHAVG	13.3333	473	DENV-3-E	TVIITVHTGDQHQVG	33.3333	673	DENV-4-E	TVVVTVHNGDTHAVG	33.3333	872	ZIKV-E	RIMLSVHGSQHSGMI	0
74	DENV-1-E	IVTVHTGDQHQVGNE	40	274	DENV-2-E	VITPHSGEEHAVGND	13.3333	474	DENV-3-E	IITVHTGDQHQVGNE	53.3333	674	DENV-4-E	VVTVHNGDTHAVGND	53.3333	873	ZIKV-E	MLSVHGSQHSGMIVN	6.66667
75	DENV-1-E	TVHTGDQHQVGNETT	20	275	DENV-2-E	TPHSGEEHAVGNDTG	0	475	DENV-3-E	TVHTGDQHQVGNETQ	13.3333	675	DENV-4-E	TVHNGDTHAVGNDTS	13.3333	874	ZIKV-E	SVHGSQHSGMIVNDT	6.66667
76	DENV-1-E	HTGDQHQVGNETTEH	13.3333	276	DENV-2-E	HSGEEHAVGNDTGKH	6.66667	476	DENV-3-E	HTGDQHQVGNETQGV	0	676	DENV-4-E	HNGDTHAVGNDTSNH	13.3333	875	ZIKV-E	HGSQHSGMIVNDTGH	6.66667
77	DENV-1-E	GDQHQVGNETTEHGT	6.66667	277	DENV-2-E	GEEHAVGNDTGKHGK	6.66667	477	DENV-3-E	GDQHQVGNETQGVTA	0	677	DENV-4-E	GDTHAVGNDTSNHGV	0	876	ZIKV-E	SQHSGMIVNDTGHET	0
78	DENV-1-E	QHQVGNETTEHGTIA	0	278	DENV-2-E	EHAVGNDTGKHGKEI	26.6667	478	DENV-3-E	QHQVGNETQGVTAEI	13.3333	678	DENV-4-E	THAVGNDTSNHGVTA	13.3333	877	ZIKV-E	HSGMIVNDTGHETDE	20
79	DENV-1-E	QVGNETTEHGTIATI	33.3333	279	DENV-2-E	AVGNDTGKHGKEIKI	6.66667	479	DENV-3-E	QVGNETQGVTAEITP	6.66667	679	DENV-4-E	AVGNDTSNHGVTATI	6.66667	878	ZIKV-E	GMIVNDTGHETDENR	13.3333
80	DENV-1-E	GNETTEHGTIATITP	20	280	DENV-2-E	GNDTGKHGKEIKITP	20	480	DENV-3-E	GNETQGVTAEITPQA	0	680	DENV-4-E	GNDTSNHGVTATITP	0	879	ZIKV-E	IVNDTGHETDENRAK	6.66667
81	DENV-1-E	ETTEHGTIATITPQA	33.3333	281	DENV-2-E	DTGKHGKEIKITPQS	13.3333	481	DENV-3-E	ETQGVTAEITPQAST	0	681	DENV-4-E	DTSNHGVTATITPRS	0	880	ZIKV-E	NDTGHETDENRAKVE	20
82	DENV-1-E	TEHGTIATITPQAPT	40	282	DENV-2-E	GKHGKEIKITPQSST	13.3333	482	DENV-3-E	QGVTAEITPQASTTE	6.66667	682	DENV-4-E	SNHGVTATITPRSPS	0	881	ZIKV-E	TGHETDENRAKVEIT	0
83	DENV-1-E	HGTIATITPQAPTSE	6.66667	283	DENV-2-E	HGKEIKITPQSSTTE	20	483	DENV-3-E	VTAEITPQASTTEAI	6.66667	683	DENV-4-E	HGVTATITPRSPSVE	0	882	ZIKV-E	HETDENRAKVEITPN	13.3333
84	DENV-1-E	TIATITPQAPTSEIQ	6.66667	284	DENV-2-E	KEIKITPQSSTTEAE	40	484	DENV-3-E	AEITPQASTTEAILP	0	684	DENV-4-E	VTATITPRSPSVEVK	6.66667	883	ZIKV-E	TDENRAKVEITPNSP	0
85	DENV-1-E	ATITPQAPTSEIQLT	20	285	DENV-2-E	IKITPQSSTTEAELT	33.3333	485	DENV-3-E	ITPQASTTEAILPEY	6.66667	685	DENV-4-E	ATITPRSPSVEVKLP	6.66667	884	ZIKV-E	ENRAKVEITPNSPRA	6.66667
86	DENV-1-E	ITPQAPTSEIQLTDY	0	286	DENV-2-E	ITPQSSTTEAELTGY	33.3333	486	DENV-3-E	PQASTTEAILPEYGT	0	686	DENV-4-E	ITPRSPSVEVKLPDY	13.3333	885	ZIKV-E	RAKVEITPNSPRAEA	6.66667
87	DENV-1-E	PQAPTSEIQLTDYGA	0	287	DENV-2-E	PQSSTTEAELTGYGT	6.66667	487	DENV-3-E	ASTTEAILPEYGTLG	0	687	DENV-4-E	PRSPSVEVKLPDYGE	13.3333	886	ZIKV-E	KVEITPNSPRAEATL	6.66667
88	DENV-1-E	APTSEIQLTDYGALT	20	288	DENV-2-E	SSTTEAELTGYGTVT	40	488	DENV-3-E	TTEAILPEYGTLGLE	33.3333	688	DENV-4-E	SPSVEVKLPDYGELT	26.6667	887	ZIKV-E	EITPNSPRAEATLGG	20
89	DENV-1-E	TSEIQLTDYGALTLD	33.3333	289	DENV-2-E	TTEAELTGYGTVTME	20	489	DENV-3-E	EAILPEYGTLGLECS	40	689	DENV-4-E	SVEVKLPDYGELTLD	33.3333	888	ZIKV-E	TPNSPRAEATLGGFG	0
90	DENV-1-E	EIQLTDYGALTLDCS	33.3333	290	DENV-2-E	EAELTGYGTVTMECS	33.3333	490	DENV-3-E	ILPEYGTLGLECSPR	0	690	DENV-4-E	EVKLPDYGELTLDCE	80	889	ZIKV-E	NSPRAEATLGGFGSL	26.6667
91	DENV-1-E	QLTDYGALTLDCSPR	13.3333	291	DENV-2-E	ELTGYGTVTMECSPR	20	491	DENV-3-E	PEYGTLGLECSPRTG	0	691	DENV-4-E	KLPDYGELTLDCEPR	66.6667	890	ZIKV-E	PRAEATLGGFGSLGL	13.3333
92	DENV-1-E	TDYGALTLDCSPRTG	6.66667	292	DENV-2-E	TGYGTVTMECSPRTG	0	492	DENV-3-E	YGTLGLECSPRTGLD	20	692	DENV-4-E	PDYGELTLDCEPRSG	60	891	ZIKV-E	AEATLGGFGSLGLDC	26.6667
93	DENV-1-E	YGALTLDCSPRTGLD	26.6667	293	DENV-2-E	YGTVTMECSPRTGLD	0	493	DENV-3-E	TLGLECSPRTGLDFN	33.3333	693	DENV-4-E	YGELTLDCEPRSGID	33.3333	892	ZIKV-E	ATLGGFGSLGLDCEP	13.3333
94	DENV-1-E	ALTLDCSPRTGLDFN	26.6667	294	DENV-2-E	TVTMECSPRTGLDFN	20	494	DENV-3-E	GLECSPRTGLDFNEM	26.6667	694	DENV-4-E	ELTLDCEPRSGIDFN	66.6667	893	ZIKV-E	LGGFGSLGLDCEPRT	33.3333
95	DENV-1-E	TLDCSPRTGLDFNEM	20	295	DENV-2-E	TMECSPRTGLDFNEM	26.6667	495	DENV-3-E	ECSPRTGLDFNEMIL	20	695	DENV-4-E	TLDCEPRSGIDFNEM	40	894	ZIKV-E	GFGSLGLDCEPRTGL	13.3333
96	DENV-1-E	DCSPRTGLDFNEMVL	20	296	DENV-2-E	ECSPRTGLDFNEMVL	40	496	DENV-3-E	SPRTGLDFNEMILLT	60	696	DENV-4-E	DCEPRSGIDFNEMIL	6.66667	895	ZIKV-E	GSLGLDCEPRTGLDF	20
97	DENV-1-E	SPRTGLDFNEMVLLT	66.6667	297	DENV-2-E	SPRTGLDFNEMVLLQ	53.3333	497	DENV-3-E	RTGLDFNEMILLTMK	13.3333	697	DENV-4-E	EPRSGIDFNEMILMK	20	896	ZIKV-E	LGLDCEPRTGLDFSD	26.6667
98	DENV-1-E	RTGLDFNEMVLLTMK	13.3333	298	DENV-2-E	RTGLDFNEMVLLQME	46.6667	498	DENV-3-E	GLDFNEMILLTMKNK	6.66667	698	DENV-4-E	RSGIDFNEMILMKMK	0	897	ZIKV-E	LDCEPRTGLDFSDLY	6.66667
99	DENV-1-E	GLDFNEMVLLTMKEK	13.3333	299	DENV-2-E	GLDFNEMVLLQMEDK	26.6667	499	DENV-3-E	DFNEMILLTMKNKAW	6.66667	699	DENV-4-E	GIDFNEMILMKMKKK	0	898	ZIKV-E	CEPRTGLDFSDLYYL	46.6667
100	DENV-1-E	DFNEMVLLTMKEKSW	13.3333	300	DENV-2-E	DFNEMVLLQMEDKAW	33.3333	500	DENV-3-E	NEMILLTMKNKAWMV	20	700	DENV-4-E	DFNEMILMKMKKKTW	0	899	ZIKV-E	PRTGLDFSDLYYLTM	13.3333
101	DENV-1-E	NEMVLLTMKEKSWLV	20	301	DENV-2-E	NEMVLLQMEDKAWLV	40	501	DENV-3-E	MILLTMKNKAWMVHR	0	701	DENV-4-E	NEMILMKMKKKTWLV	20	900	ZIKV-E	TGLDFSDLYYLTMNN	66.6667
102	DENV-1-E	MVLLTMKEKSWLVHK	20	302	DENV-2-E	MVLLQMEDKAWLVHR	20	502	DENV-3-E	LLTMKNKAWMVHRQW	0	702	DENV-4-E	MILMKMKKKTWLVHK	13.3333	901	ZIKV-E	LDFSDLYYLTMNNKH	13.3333
103	DENV-1-E	LLTMKEKSWLVHKQW	0	303	DENV-2-E	LLQMEDKAWLVHRQW	6.66667	503	DENV-3-E	TMKNKAWMVHRQWFF	0	703	DENV-4-E	LMKMKKKTWLVHKQW	0	902	ZIKV-E	FSDLYYLTMNNKHWL	6.66667
104	DENV-1-E	TMKEKSWLVHKQWFL	0	304	DENV-2-E	QMEDKAWLVHRQWFL	6.66667	504	DENV-3-E	KNKAWMVHRQWFFDL	20	704	DENV-4-E	KMKKKTWLVHKQWFL	0	903	ZIKV-E	DLYYLTMNNKHWLVH	26.6667
105	DENV-1-E	KEKSWLVHKQWFLDL	20	305	DENV-2-E	EDKAWLVHRQWFLDL	33.3333	505	DENV-3-E	KAWMVHRQWFFDLPL	26.6667	705	DENV-4-E	KKKTWLVHKQWFLDL	26.6667	904	ZIKV-E	YYLTMNNKHWLVHKE	13.3333
106	DENV-1-E	KSWLVHKQWFLDLPL	20	306	DENV-2-E	KAWLVHRQWFLDLPL	20	506	DENV-3-E	WMVHRQWFFDLPLPW	13.3333	706	DENV-4-E	KTWLVHKQWFLDLPL	33.3333	905	ZIKV-E	LTMNNKHWLVHKEWF	20
107	DENV-1-E	WLVHKQWFLDLPLPW	13.3333	307	DENV-2-E	WLVHRQWFLDLPLPW	13.3333	507	DENV-3-E	VHRQWFFDLPLPWTS	26.6667	707	DENV-4-E	WLVHKQWFLDLPLPW	13.3333	906	ZIKV-E	MNNKHWLVHKEWFHD	20
108	DENV-1-E	VHKQWFLDLPLPWTS	26.6667	308	DENV-2-E	VHRQWFLDLPLPWLP	13.3333	508	DENV-3-E	RQWFFDLPLPWTSGA	26.6667	708	DENV-4-E	VHKQWFLDLPLPWTT	33.3333	907	ZIKV-E	NKHWLVHKEWFHDIP	26.6667
109	DENV-1-E	KQWFLDLPLPWTSGA	40	309	DENV-2-E	RQWFLDLPLPWLPGA	26.6667	509	DENV-3-E	WFFDLPLPWTSGATA	6.66667	709	DENV-4-E	KQWFLDLPLPWTTGA	26.6667	908	ZIKV-E	HWLVHKEWFHDIPLP	20
110	DENV-1-E	WFLDLPLPWTSGAST	0	310	DENV-2-E	WFLDLPLPWLPGADT	20	510	DENV-3-E	FDLPLPWTSGATAET	20	710	DENV-4-E	WFLDLPLPWTTGADT	0	909	ZIKV-E	LVHKEWFHDIPLPWH	13.3333
111	DENV-1-E	LDLPLPWTSGASTSQ	13.3333	311	DENV-2-E	LDLPLPWLPGADTQG	6.66667	511	DENV-3-E	LPLPWTSGATAETPT	6.66667	711	DENV-4-E	LDLPLPWTTGADTSE	6.66667	910	ZIKV-E	HKEWFHDIPLPWHAG	0
112	DENV-1-E	LPLPWTSGASTSQET	0	312	DENV-2-E	LPLPWLPGADTQGSN	20	512	DENV-3-E	LPWTSGATAETPTWN	6.66667	712	DENV-4-E	LPLPWTTGADTSEVH	6.66667	911	ZIKV-E	EWFHDIPLPWHAGAD	13.3333
113	DENV-1-E	LPWTSGASTSQETWN	13.3333	313	DENV-2-E	LPWLPGADTQGSNWI	20	513	DENV-3-E	WTSGATAETPTWNRK	0	713	DENV-4-E	LPWTTGADTSEVHWN	6.66667	912	ZIKV-E	FHDIPLPWHAGADTG	6.66667
114	DENV-1-E	WTSGASTSQETWNRQ	13.3333	314	DENV-2-E	WLPGADTQGSNWIQK	13.3333	514	DENV-3-E	SGATAETPTWNRKEL	6.66667	714	DENV-4-E	WTTGADTSEVHWNYK	0	913	ZIKV-E	DIPLPWHAGADTGTP	13.3333
115	DENV-1-E	SGASTSQETWNRQDL	33.3333	315	DENV-2-E	PGADTQGSNWIQKET	6.66667	515	DENV-3-E	ATAETPTWNRKELLV	0	715	DENV-4-E	TGADTSEVHWNYKER	6.66667	914	ZIKV-E	PLPWHAGADTGTPHW	6.66667
116	DENV-1-E	ASTSQETWNRQDLLV	40	316	DENV-2-E	ADTQGSNWIQKETLV	26.6667	516	DENV-3-E	AETPTWNRKELLVTF	13.3333	716	DENV-4-E	ADTSEVHWNYKERMV	0	915	ZIKV-E	PWHAGADTGTPHWNN	33.3333
117	DENV-1-E	TSQETWNRQDLLVTF	40	317	DENV-2-E	TQGSNWIQKETLVTF	26.6667	517	DENV-3-E	TPTWNRKELLVTFKN	6.66667	717	DENV-4-E	TSEVHWNYKERMVTF	13.3333	916	ZIKV-E	HAGADTGTPHWNNKE	26.6667
118	DENV-1-E	QETWNRQDLLVTFKT	0	318	DENV-2-E	GSNWIQKETLVTFKN	26.6667	518	DENV-3-E	TWNRKELLVTFKNAH	0	718	DENV-4-E	EVHWNYKERMVTFKV	13.3333	917	ZIKV-E	GADTGTPHWNNKEAL	26.6667
119	DENV-1-E	TWNRQDLLVTFKTAH	6.66667	319	DENV-2-E	NWIQKETLVTFKNPH	40	519	DENV-3-E	NRKELLVTFKNAHAK	6.66667	719	DENV-4-E	HWNYKERMVTFKVPH	0	918	ZIKV-E	DTGTPHWNNKEALVE	40
120	DENV-1-E	NRQDLLVTFKTAHAK	26.6667	320	DENV-2-E	IQKETLVTFKNPHAK	6.66667	520	DENV-3-E	KELLVTFKNAHAKKQ	6.66667	720	DENV-4-E	NYKERMVTFKVPHAK	6.66667	919	ZIKV-E	GTPHWNNKEALVEFK	40
121	DENV-1-E	QDLLVTFKTAHAKKQ	13.3333	321	DENV-2-E	KETLVTFKNPHAKKQ	0	521	DENV-3-E	LLVTFKNAHAKKQEV	13.3333	721	DENV-4-E	KERMVTFKVPHAKRQ	6.66667	920	ZIKV-E	PHWNNKEALVEFKDA	33.3333
122	DENV-1-E	LLVTFKTAHAKKQEV	6.66667	322	DENV-2-E	TLVTFKNPHAKKQDV	0	522	DENV-3-E	VTFKNAHAKKQEVVV	20	722	DENV-4-E	RMVTFKVPHAKRQDV	0	921	ZIKV-E	WNNKEALVEFKDAHA	33.3333
123	DENV-1-E	VTFKTAHAKKQEVVV	13.3333	323	DENV-2-E	VTFKNPHAKKQDVVV	0	523	DENV-3-E	FKNAHAKKQEVVVLG	13.3333	723	DENV-4-E	VTFKVPHAKRQDVTV	0	922	ZIKV-E	NKEALVEFKDAHAKR	26.6667
124	DENV-1-E	FKTAHAKKQEVVVLG	13.3333	324	DENV-2-E	FKNPHAKKQDVVVLG	0	524	DENV-3-E	NAHAKKQEVVVLGSQ	26.6667	724	DENV-4-E	FKVPHAKRQDVTVLG	0	923	ZIKV-E	EALVEFKDAHAKRQT	20
125	DENV-1-E	TAHAKKQEVVVLGSQ	6.66667	325	DENV-2-E	NPHAKKQDVVVLGSQ	20	525	DENV-3-E	HAKKQEVVVLGSQEG	20	725	DENV-4-E	VPHAKRQDVTVLGSQ	6.66667	924	ZIKV-E	LVEFKDAHAKRQTVV	13.3333
126	DENV-1-E	HAKKQEVVVLGSQEG	26.6667	326	DENV-2-E	HAKKQDVVVLGSQEG	13.3333	526	DENV-3-E	KKQEVVVLGSQEGAM	13.3333	726	DENV-4-E	HAKRQDVTVLGSQEG	6.66667	925	ZIKV-E	EFKDAHAKRQTVVVL	6.66667
127	DENV-1-E	KKQEVVVLGSQEGAM	13.3333	327	DENV-2-E	KKQDVVVLGSQEGAM	6.66667	527	DENV-3-E	QEVVVLGSQEGAMHT	13.3333	727	DENV-4-E	KRQDVTVLGSQEGAM	13.3333	926	ZIKV-E	KDAHAKRQTVVVLGS	0
128	DENV-1-E	QEVVVLGSQEGAMHT	20	328	DENV-2-E	QDVVVLGSQEGAMHT	6.66667	528	DENV-3-E	VVVLGSQEGAMHTAL	6.66667	728	DENV-4-E	QDVTVLGSQEGAMHS	20	927	ZIKV-E	AHAKRQTVVVLGSQE	20
129	DENV-1-E	VVVLGSQEGAMHTAL	6.66667	329	DENV-2-E	VVVLGSQEGAMHTAL	6.66667	529	DENV-3-E	VLGSQEGAMHTALTG	20	729	DENV-4-E	VTVLGSQEGAMHSAL	40	928	ZIKV-E	AKRQTVVVLGSQEGA	6.66667
130	DENV-1-E	VLGSQEGAMHTALTG	13.3333	330	DENV-2-E	VLGSQEGAMHTALTG	6.66667	530	DENV-3-E	GSQEGAMHTALTGAT	6.66667	730	DENV-4-E	VLGSQEGAMHSALAG	13.3333	929	ZIKV-E	RQTVVVLGSQEGAVH	6.66667
131	DENV-1-E	GSQEGAMHTALTGAT	6.66667	331	DENV-2-E	GSQEGAMHTALTGAT	40	531	DENV-3-E	QEGAMHTALTGATEI	20	731	DENV-4-E	GSQEGAMHSALAGAT	6.66667	930	ZIKV-E	TVVVLGSQEGAVHTA	6.66667
132	DENV-1-E	QEGAMHTALTGATEI	13.3333	332	DENV-2-E	QEGAMHTALTGATEI	20	532	DENV-3-E	GAMHTALTGATEIQN	6.66667	732	DENV-4-E	QEGAMHSALAGATEV	40	931	ZIKV-E	VVLGSQEGAVHTALA	0
133	DENV-1-E	GAMHTALTGATEIQT	40	333	DENV-2-E	GAMHTALTGATEIQM	20	533	DENV-3-E	MHTALTGATEIQNSG	6.66667	733	DENV-4-E	GAMHSALAGATEVDS	60	932	ZIKV-E	LGSQEGAVHTALAGA	0
134	DENV-1-E	MHTALTGATEIQTSG	0	334	DENV-2-E	MHTALTGATEIQMSS	6.66667	534	DENV-3-E	TALTGATEIQNSGGT	0	734	DENV-4-E	MHSALAGATEVDSGD	46.6667	933	ZIKV-E	SQEGAVHTALAGALE	13.3333
135	DENV-1-E	TALTGATEIQTSGTT	0	335	DENV-2-E	TALTGATEIQMSSGN	6.66667	535	DENV-3-E	LTGATEIQNSGGTSI	13.3333	735	DENV-4-E	SALAGATEVDSGDGN	46.6667	934	ZIKV-E	EGAVHTALAGALEAE	40
136	DENV-1-E	LTGATEIQTSGTTTI	13.3333	336	DENV-2-E	LTGATEIQMSSGNLL	20	536	DENV-3-E	GATEIQNSGGTSIFA	6.66667	736	DENV-4-E	LAGATEVDSGDGNHM	0	935	ZIKV-E	AVHTALAGALEAEMD	33.3333
137	DENV-1-E	GATEIQTSGTTTIFA	6.66667	337	DENV-2-E	GATEIQMSSGNLLFT	20	537	DENV-3-E	TEIQNSGGTSIFAGH	6.66667	737	DENV-4-E	GATEVDSGDGNHMFA	13.3333	936	ZIKV-E	HTALAGALEAEMDGA	13.3333
138	DENV-1-E	TEIQTSGTTTIFAGH	6.66667	338	DENV-2-E	TEIQMSSGNLLFTGH	13.3333	538	DENV-3-E	IQNSGGTSIFAGHLK	0	738	DENV-4-E	TEVDSGDGNHMFAGH	13.3333	937	ZIKV-E	ALAGALEAEMDGAKG	6.66667
139	DENV-1-E	IQTSGTTTIFAGHLK	0	339	DENV-2-E	IQMSSGNLLFTGHLK	6.66667	539	DENV-3-E	NSGGTSIFAGHLKCR	20	739	DENV-4-E	VDSGDGNHMFAGHLK	13.3333	938	ZIKV-E	AGALEAEMDGAKGRL	13.3333
140	DENV-1-E	TSGTTTIFAGHLKCR	13.3333	340	DENV-2-E	MSSGNLLFTGHLKCR	13.3333	540	DENV-3-E	GGTSIFAGHLKCRLK	0	740	DENV-4-E	SGDGNHMFAGHLKCK	0	939	ZIKV-E	ALEAEMDGAKGRLSS	6.66667
141	DENV-1-E	GTTTIFAGHLKCRLK	6.66667	341	DENV-2-E	SGNLLFTGHLKCRLR	6.66667	541	DENV-3-E	TSIFAGHLKCRLKMD	0	741	DENV-4-E	DGNHMFAGHLKCKVR	0	940	ZIKV-E	EAEMDGAKGRLSSGH	33.3333
142	DENV-1-E	TTIFAGHLKCRLKMD	6.66667	342	DENV-2-E	NLLFTGHLKCRLRMD	13.3333	542	DENV-3-E	IFAGHLKCRLKMDKL	6.66667	742	DENV-4-E	NHMFAGHLKCKVRME	13.3333	941	ZIKV-E	EMDGAKGRLSSGHLK	6.66667
143	DENV-1-E	IFAGHLKCRLKMDKL	6.66667	343	DENV-2-E	LFTGHLKCRLRMDKL	6.66667	543	DENV-3-E	AGHLKCRLKMDKLEL	6.66667	743	DENV-4-E	MFAGHLKCKVRMEKL	0	942	ZIKV-E	DGAKGRLSSGHLKCR	6.66667
144	DENV-1-E	AGHLKCRLKMDKLTL	0	344	DENV-2-E	TGHLKCRLRMDKLQL	0	544	DENV-3-E	HLKCRLKMDKLELKG	0	744	DENV-4-E	AGHLKCKVRMEKLRI	0	943	ZIKV-E	AKGRLSSGHLKCRLK	6.66667
145	DENV-1-E	HLKCRLKMDKLTLKG	6.66667	345	DENV-2-E	HLKCRLRMDKLQLKG	0	545	DENV-3-E	KCRLKMDKLELKGMS	0	745	DENV-4-E	HLKCKVRMEKLRIKG	0	944	ZIKV-E	GRLSSGHLKCRLKMD	0
146	DENV-1-E	KCRLKMDKLTLKGMS	0	346	DENV-2-E	KCRLRMDKLQLKGMS	0	546	DENV-3-E	RLKMDKLELKGMSYA	0	746	DENV-4-E	KCKVRMEKLRIKGMS	0	945	ZIKV-E	LSSGHLKCRLKMDKL	6.66667
147	DENV-1-E	RLKMDKLTLKGMSYV	0	347	DENV-2-E	RLRMDKLQLKGMSYS	0	547	DENV-3-E	KMDKLELKGMSYAMC	0	747	DENV-4-E	KVRMEKLRIKGMSYT	6.66667	946	ZIKV-E	SGHLKCRLKMDKLRL	6.66667
148	DENV-1-E	KMDKLTLKGMSYVMC	0	348	DENV-2-E	RMDKLQLKGMSYSMC	6.66667	548	DENV-3-E	DKLELKGMSYAMCTN	13.3333	748	DENV-4-E	RMEKLRIKGMSYTMC	0	947	ZIKV-E	HLKCRLKMDKLRLKG	6.66667
149	DENV-1-E	DKLTLKGMSYVMCTG	13.3333	349	DENV-2-E	DKLQLKGMSYSMCTG	6.66667	549	DENV-3-E	LELKGMSYAMCTNTF	0	749	DENV-4-E	EKLRIKGMSYTMCSG	0	948	ZIKV-E	KCRLKMDKLRLKGVS	6.66667
150	DENV-1-E	LTLKGMSYVMCTGSF	6.66667	350	DENV-2-E	LQLKGMSYSMCTGKF	0	550	DENV-3-E	LKGMSYAMCTNTFVL	0	750	DENV-4-E	LRIKGMSYTMCSGKF	0	949	ZIKV-E	RLKMDKLRLKGVSYS	0
151	DENV-1-E	LKGMSYVMCTGSFKL	6.66667	351	DENV-2-E	LKGMSYSMCTGKFKI	13.3333	551	DENV-3-E	GMSYAMCTNTFVLKK	0	751	DENV-4-E	IKGMSYTMCSGKFSI	0	950	ZIKV-E	KMDKLRLKGVSYSLC	0
152	DENV-1-E	GMSYVMCTGSFKLEK	13.3333	352	DENV-2-E	GMSYSMCTGKFKIVK	20	552	DENV-3-E	SYAMCTNTFVLKKEV	0	752	DENV-4-E	GMSYTMCSGKFSIDK	0	951	ZIKV-E	DKLRLKGVSYSLCTA	6.66667
153	DENV-1-E	SYVMCTGSFKLEKEV	6.66667	353	DENV-2-E	SYSMCTGKFKIVKEI	13.3333	553	DENV-3-E	AMCTNTFVLKKEVSE	0	753	DENV-4-E	SYTMCSGKFSIDKEM	0	952	ZIKV-E	LRLKGVSYSLCTAAF	20
154	DENV-1-E	VMCTGSFKLEKEVAE	20	354	DENV-2-E	SMCTGKFKIVKEIAE	6.66667	554	DENV-3-E	CTNTFVLKKEVSETQ	6.66667	754	DENV-4-E	TMCSGKFSIDKEMAE	0	953	ZIKV-E	LKGVSYSLCTAAFTF	0
155	DENV-1-E	CTGSFKLEKEVAETQ	20	355	DENV-2-E	CTGKFKIVKEIAETQ	0	555	DENV-3-E	NTFVLKKEVSETQHG	33.3333	755	DENV-4-E	CSGKFSIDKEMAETQ	0	954	ZIKV-E	GVSYSLCTAAFTFTK	0
156	DENV-1-E	GSFKLEKEVAETQHG	6.66667	356	DENV-2-E	GKFKIVKEIAETQHG	0	556	DENV-3-E	FVLKKEVSETQHGTI	6.66667	756	DENV-4-E	GKFSIDKEMAETQHG	0	955	ZIKV-E	SYSLCTAAFTFTKIP	0
157	DENV-1-E	FKLEKEVAETQHGTV	6.66667	357	DENV-2-E	FKIVKEIAETQHGTI	0	557	DENV-3-E	LKKEVSETQHGTILI	6.66667	757	DENV-4-E	FSIDKEMAETQHGTT	6.66667	956	ZIKV-E	SLCTAAFTFTKIPAE	33.3333
158	DENV-1-E	LEKEVAETQHGTVLV	6.66667	358	DENV-2-E	IVKEIAETQHGTIVI	13.3333	558	DENV-3-E	KEVSETQHGTILIKV	0	758	DENV-4-E	IDKEMAETQHGTTVV	13.3333	957	ZIKV-E	CTAAFTFTKIPAETL	20
159	DENV-1-E	KEVAETQHGTVLVQV	0	359	DENV-2-E	KEIAETQHGTIVIRV	0	559	DENV-3-E	VSETQHGTILIKVEY	20	759	DENV-4-E	KEMAETQHGTTVVKV	0	958	ZIKV-E	AAFTFTKIPAETLHG	0
160	DENV-1-E	VAETQHGTVLVQVKY	6.66667	360	DENV-2-E	IAETQHGTIVIRVQY	20	560	DENV-3-E	ETQHGTILIKVEYKG	6.66667	760	DENV-4-E	MAETQHGTTVVKVKY	6.66667	959	ZIKV-E	FTFTKIPAETLHGTV	0
161	DENV-1-E	ETQHGTVLVQVKYEG	26.6667	361	DENV-2-E	ETQHGTIVIRVQYEG	33.3333	561	DENV-3-E	QHGTILIKVEYKGED	20	761	DENV-4-E	ETQHGTTVVKVKYEG	6.66667	960	ZIKV-E	FTKIPAETLHGTVTV	13.3333
162	DENV-1-E	QHGTVLVQVKYEGTD	0	362	DENV-2-E	QHGTIVIRVQYEGDG	13.3333	562	DENV-3-E	GTILIKVEYKGEDAP	6.66667	762	DENV-4-E	QHGTTVVKVKYEGAG	0	961	ZIKV-E	KIPAETLHGTVTVEV	46.6667
163	DENV-1-E	GTVLVQVKYEGTDAP	6.66667	363	DENV-2-E	GTIVIRVQYEGDGSP	6.66667	563	DENV-3-E	ILIKVEYKGEDAPCK	6.66667	763	DENV-4-E	GTTVVKVKYEGAGAP	6.66667	962	ZIKV-E	PAETLHGTVTVEVQY	33.3333
164	DENV-1-E	VLVQVKYEGTDAPCK	13.3333	364	DENV-2-E	IVIRVQYEGDGSPCK	0	564	DENV-3-E	IKVEYKGEDAPCKIP	6.66667	764	DENV-4-E	TVVKVKYEGAGAPCK	13.3333	963	ZIKV-E	ETLHGTVTVEVQYAG	40
165	DENV-1-E	VQVKYEGTDAPCKIP	13.3333	365	DENV-2-E	IRVQYEGDGSPCKIP	0	565	DENV-3-E	VEYKGEDAPCKIPFS	6.66667	765	DENV-4-E	VKVKYEGAGAPCKVP	13.3333	964	ZIKV-E	LHGTVTVEVQYAGTD	20
166	DENV-1-E	VKYEGTDAPCKIPFS	13.3333	366	DENV-2-E	VQYEGDGSPCKIPFE	6.66667	566	DENV-3-E	YKGEDAPCKIPFSTE	13.3333	766	DENV-4-E	VKYEGAGAPCKVPIE	33.3333	965	ZIKV-E	GTVTVEVQYAGTDGP	33.3333
167	DENV-1-E	YEGTDAPCKIPFSTQ	13.3333	367	DENV-2-E	YEGDGSPCKIPFEIT	6.66667	567	DENV-3-E	GEDAPCKIPFSTEDG	26.6667	767	DENV-4-E	YEGAGAPCKVPIEIR	26.6667	966	ZIKV-E	VTVEVQYAGTDGPCK	33.3333
168	DENV-1-E	GTDAPCKIPFSTQDE	13.3333	368	DENV-2-E	GDGSPCKIPFEITDL	26.6667	568	DENV-3-E	DAPCKIPFSTEDGQG	33.3333	768	DENV-4-E	GAGAPCKVPIEIRDV	40	967	ZIKV-E	VEVQYAGTDGPCKVP	0
169	DENV-1-E	DAPCKIPFSTQDEKG	26.6667	369	DENV-2-E	GSPCKIPFEITDLEK	6.66667	569	DENV-3-E	PCKIPFSTEDGQGKA	0	769	DENV-4-E	GAPCKVPIEIRDVNK	40	968	ZIKV-E	VQYAGTDGPCKVPAQ	0
170	DENV-1-E	PCKIPFSTQDEKGVT	6.66667	370	DENV-2-E	PCKIPFEITDLEKRH	26.6667	570	DENV-3-E	KIPFSTEDGQGKAHN	0	770	DENV-4-E	PCKVPIEIRDVNKEK	53.3333	969	ZIKV-E	YAGTDGPCKVPAQMA	0
171	DENV-1-E	KIPFSTQDEKGVTQN	6.66667	371	DENV-2-E	KIPFEITDLEKRHVL	13.3333	571	DENV-3-E	PFSTEDGQGKAHNGR	0	771	DENV-4-E	KVPIEIRDVNKEKVV	33.3333	970	ZIKV-E	GTDGPCKVPAQMAVD	6.66667
172	DENV-1-E	PFSTQDEKGVTQNGR	0	372	DENV-2-E	PFEITDLEKRHVLGR	6.66667	572	DENV-3-E	STEDGQGKAHNGRLI	13.3333	772	DENV-4-E	PIEIRDVNKEKVVGR	53.3333	971	ZIKV-E	DGPCKVPAQMAVDMQ	6.66667
173	DENV-1-E	STQDEKGVTQNGRLI	13.3333	373	DENV-2-E	EITDLEKRHVLGRLI	13.3333	573	DENV-3-E	EDGQGKAHNGRLITA	13.3333	773	DENV-4-E	EIRDVNKEKVVGRVI	66.6667	972	ZIKV-E	PCKVPAQMAVDMQTL	0
174	DENV-1-E	QDEKGVTQNGRLITA	13.3333	374	DENV-2-E	TDLEKRHVLGRLITV	6.66667	574	DENV-3-E	GQGKAHNGRLITANP	13.3333	774	DENV-4-E	RDVNKEKVVGRVISA	6.66667	973	ZIKV-E	KVPAQMAVDMQTLTP	0
175	DENV-1-E	EKGVTQNGRLITANP	13.3333	375	DENV-2-E	LEKRHVLGRLITVNP	13.3333	575	DENV-3-E	GKAHNGRLITANPVV	26.6667	775	DENV-4-E	VNKEKVVGRVISATP	6.66667	974	ZIKV-E	PAQMAVDMQTLTPVG	6.66667
176	DENV-1-E	GVTQNGRLITANPIV	13.3333	376	DENV-2-E	KRHVLGRLITVNPIV	26.6667	576	DENV-3-E	AHNGRLITANPVVTK	6.66667	776	DENV-4-E	KEKVVGRVISATPLA	0	975	ZIKV-E	QMAVDMQTLTPVGRL	0
177	DENV-1-E	TQNGRLITANPIVTD	0	377	DENV-2-E	HVLGRLITVNPIVTE	33.3333	577	DENV-3-E	NGRLITANPVVTKKE	13.3333	777	DENV-4-E	KVVGRVISATPLAEN	0	976	ZIKV-E	AVDMQTLTPVGRLIT	6.66667
178	DENV-1-E	NGRLITANPIVTDKE	0	378	DENV-2-E	LGRLITVNPIVTEKD	33.3333	578	DENV-3-E	RLITANPVVTKKEEP	26.6667	778	DENV-4-E	VGRVISATPLAENTN	26.6667	977	ZIKV-E	DMQTLTPVGRLITAN	6.66667
179	DENV-1-E	RLITANPIVTDKEKP	13.3333	379	DENV-2-E	RLITVNPIVTEKDSP	26.6667	579	DENV-3-E	ITANPVVTKKEEPVN	33.3333	779	DENV-4-E	RVISATPLAENTNSV	20	978	ZIKV-E	QTLTPVGRLITANPV	40
180	DENV-1-E	ITANPIVTDKEKPVN	20	380	DENV-2-E	ITVNPIVTEKDSPVN	46.6667	580	DENV-3-E	ANPVVTKKEEPVNIE	40	780	DENV-4-E	ISATPLAENTNSVTN	26.6667	979	ZIKV-E	LTPVGRLITANPVIT	0
181	DENV-1-E	ANPIVTDKEKPVNIE	20	381	DENV-2-E	VNPIVTEKDSPVNIE	33.3333	581	DENV-3-E	PVVTKKEEPVNIEAE	53.3333	781	DENV-4-E	ATPLAENTNSVTNIE	66.6667	980	ZIKV-E	PVGRLITANPVITES	40
182	DENV-1-E	PIVTDKEKPVNIETE	20	382	DENV-2-E	PIVTEKDSPVNIEAE	46.6667	582	DENV-3-E	VTKKEEPVNIEAEPP	40	782	DENV-4-E	PLAENTNSVTNIELE	66.6667	981	ZIKV-E	GRLITANPVITESTE	33.3333
183	DENV-1-E	VTDKEKPVNIETEPP	13.3333	383	DENV-2-E	VTEKDSPVNIEAEPP	40	583	DENV-3-E	KKEEPVNIEAEPPFG	60	783	DENV-4-E	AENTNSVTNIELEPP	66.6667	982	ZIKV-E	LITANPVITESTENS	53.3333
184	DENV-1-E	DKEKPVNIETEPPFG	13.3333	384	DENV-2-E	EKDSPVNIEAEPPFG	66.6667	584	DENV-3-E	EEPVNIEAEPPFGES	86.6667	784	DENV-4-E	NTNSVTNIELEPPFG	73.3333	983	ZIKV-E	TANPVITESTENSKM	26.6667
185	DENV-1-E	EKPVNIETEPPFGES	73.3333	385	DENV-2-E	DSPVNIEAEPPFGDS	66.6667	585	DENV-3-E	PVNIEAEPPFGESNI	80	785	DENV-4-E	NSVTNIELEPPFGDS	53.3333	984	ZIKV-E	NPVITESTENSKMML	33.3333
186	DENV-1-E	PVNIETEPPFGESYI	53.3333	386	DENV-2-E	PVNIEAEPPFGDSYI	53.3333	586	DENV-3-E	NIEAEPPFGESNIVI	46.6667	786	DENV-4-E	VTNIELEPPFGDSYI	53.3333	985	ZIKV-E	VITESTENSKMMLEL	46.6667
187	DENV-1-E	NIETEPPFGESYIVV	73.3333	387	DENV-2-E	NIEAEPPFGDSYIIV	40	587	DENV-3-E	EAEPPFGESNIVIGI	66.6667	787	DENV-4-E	NIELEPPFGDSYIVI	60	986	ZIKV-E	TESTENSKMMLELDP	6.66667
188	DENV-1-E	ETEPPFGESYIVVGA	73.3333	388	DENV-2-E	EAEPPFGDSYIIVGV	80	588	DENV-3-E	EPPFGESNIVIGIGD	60	788	DENV-4-E	ELEPPFGDSYIVIGV	46.6667	987	ZIKV-E	STENSKMMLELDPPF	20
189	DENV-1-E	EPPFGESYIVVGAGE	66.6667	389	DENV-2-E	EPPFGDSYIIVGVEP	53.3333	589	DENV-3-E	PFGESNIVIGIGDNA	40	789	DENV-4-E	EPPFGDSYIVIGVGN	40	988	ZIKV-E	ENSKMMLELDPPFGD	53.3333
190	DENV-1-E	PFGESYIVVGAGEKA	13.3333	390	DENV-2-E	PFGDSYIIVGVEPGQ	33.3333	590	DENV-3-E	GESNIVIGIGDNALK	6.66667	790	DENV-4-E	PFGDSYIVIGVGNSA	33.3333	989	ZIKV-E	SKMMLELDPPFGDSY	46.6667
191	DENV-1-E	GESYIVVGAGEKALK	6.66667	391	DENV-2-E	GDSYIIVGVEPGQLK	13.3333	591	DENV-3-E	SNIVIGIGDNALKIN	26.6667	791	DENV-4-E	GDSYIVIGVGNSALT	40	990	ZIKV-E	MMLELDPPFGDSYIV	46.6667
192	DENV-1-E	SYIVVGAGEKALKLS	20	392	DENV-2-E	SYIIVGVEPGQLKLN	20	592	DENV-3-E	IVIGIGDNALKINWY	20	792	DENV-4-E	SYIVIGVGNSALTLH	26.6667	991	ZIKV-E	LELDPPFGDSYIVIG	40
193	DENV-1-E	IVVGAGEKALKLSWF	13.3333	393	DENV-2-E	IIVGVEPGQLKLNWF	26.6667	593	DENV-3-E	IGIGDNALKINWYKG	0	793	DENV-4-E	IVIGVGNSALTLHWF	20	992	ZIKV-E	LDPPFGDSYIVIGVG	26.6667
194	DENV-1-E	VGAGEKALKLSWFKG	0	394	DENV-2-E	VGVEPGQLKLNWFKG	0	594	DENV-3-E	IGDNALKINWYKGSG	6.66667	794	DENV-4-E	IGVGNSALTLHWFRG	13.3333	993	ZIKV-E	PPFGDSYIVIGVGEK	26.6667
195	DENV-1-E	AGEKALKLSWFKGSG	0	395	DENV-2-E	VEPGQLKLNWFKGSG	0	595	DENV-3-E	DNALKINWYKGSGSG	13.3333	795	DENV-4-E	VGNSALTLHWFRGSG	0	994	ZIKV-E	FGDSYIVIGVGEKKI	13.3333
196	DENV-1-E	EKALKLSWFKGSGSG	6.66667	396	DENV-2-E	PGQLKLNWFKGSGSG	6.66667	596	DENV-3-E	ALKINWYKGSGSGSG	20	796	DENV-4-E	NSALTLHWFRGSGSG	13.3333	995	ZIKV-E	DSYIVIGVGEKKITH	26.6667
197	DENV-1-E	ALKLSWFKGSGSGSG	13.3333	397	DENV-2-E	QLKLNWFKGSGSGSG	20	597	DENV-3/4-E	KINWYKGSGSGSGMR	20	797	DENV-4-E	ALTLHWFRGSGSGSG	0	996	ZIKV-E	YIVIGVGEKKITHHW	0
198	DENV-1/2-E	KLSWFKGSGSGSGMR	13.3333	398	DENV-2/3-E	KLNWFKGSGSGSGMR	20	598	DENV-3/4-E	NWYKGSGSGSGMRCV	20	798	DENV-4/ZIKV-E	TLHWFRGSGSGSGMR	6.66667	997	ZIKV-E	VIGVGEKKITHHWHR	0
199	DENV-1/2-E	SWFKGSGSGSGMRCI	26.6667	399	DENV-2/3-E	NWFKGSGSGSGMRCV	26.6667	599	DENV-3/4-E	YKGSGSGSGMRCVGV	13.3333	799	DENV-4/ZIKV-E	HWFRGSGSGSGMRCI	0	998	ZIKV-E	GVGEKKITHHWHRGS	6.66667
200	DENV-1/2-E	FKGSGSGSGMRCIGI	13.3333	400	DENV-2/3-E	FKGSGSGSGMRCVGV	13.3333						DENV-4/ZIKV-E	FRGSGSGSGMRCIGV	0	999	ZIKV-E	GEKKITHHWHRGSGS	0
																		KKITHHWHRGSGSGS	0
1005	DENV-1-NS1	SGSGSGDSGCVINWK	0	1184	DENV-2-NS1	GSGSGSGDSGCIVSW	26.6667	1364	DENV-3-NS1	SGSGSGDMGCVINWK	0	1543	DENV-4-NS1	GSGSGSGDMGCVVSW	6.66667	1723	ZIKV-NS1	SGSGSGDVGCSVDFS	20
1006	DENV-1-NS1	SGSGDSGCVINWKGR	0	1185	DENV-2-NS1	GSGSGDSGCIVSWKN	0	1365	DENV-3-NS1	SGSGDMGCVINWKGK	0	1544	DENV-4-NS1	GSGSGDMGCVVSWSG	6.66667	1724	ZIKV-NS1	SGSGDVGCSVDFSKK	0
1007	DENV-1-NS1	SGDSGCVINWKGREL	6.66667	1186	DENV-2-NS1	GSGDSGCIVSWKNKE	13.3333	1366	DENV-3-NS1	SGDMGCVINWKGKEL	6.66667	1545	DENV-4-NS1	GSGDMGCVVSWSGRE	20	1725	ZIKV-NS1	SGDVGCSVDFSKKET	0
1008	DENV-1-NS1	DSGCVINWKGRELKC	0	1187	DENV-2-NS1	GDSGCIVSWKNKELK	0	1367	DENV-3-NS1	DMGCVINWKGKELKC	0	1546	DENV-4-NS1	GDMGCVVSWSGRELK	6.66667	1726	ZIKV-NS1	DVGCSVDFSKKETRC	6.66667
1009	DENV-1-NS1	GCVINWKGRELKCGS	0	1188	DENV-2-NS1	SGCIVSWKNKELKCG	0	1368	DENV-3-NS1	GCVINWKGKELKCGS	0	1547	DENV-4-NS1	MGCVVSWSGRELKCG	0	1727	ZIKV-NS1	GCSVDFSKKETRCGT	0
1010	DENV-1-NS1	VINWKGRELKCGSGI	6.66667	1189	DENV-2-NS1	CIVSWKNKELKCGSG	0	1369	DENV-3-NS1	VINWKGKELKCGSGI	0	1548	DENV-4-NS1	CVVSWSGRELKCGSG	0	1728	ZIKV-NS1	SVDFSKKETRCGTGV	0
1011	DENV-1-NS1	NWKGRELKCGSGIFV	6.66667	1190	DENV-2-NS1	VSWKNKELKCGSGIF	0	1370	DENV-3-NS1	NWKGKELKCGSGIFV	0	1549	DENV-4-NS1	VSWSGRELKCGSGIF	13.3333	1729	ZIKV-NS1	DFSKKETRCGTGVFV	6.66667
1012	DENV-1-NS1	KGRELKCGSGIFVTN	0	1191	DENV-2-NS1	WKNKELKCGSGIFIT	0	1371	DENV-3-NS1	KGKELKCGSGIFVTN	0	1550	DENV-4-NS1	WSGRELKCGSGIFVV	13.3333	1730	ZIKV-NS1	SKKETRCGTGVFVYN	0
1013	DENV-1-NS1	RELKCGSGIFVTNEV	33.3333	1192	DENV-2-NS1	NKELKCGSGIFITDN	46.6667	1372	DENV-3-NS1	KELKCGSGIFVTNEV	33.3333	1551	DENV-4-NS1	GRELKCGSGIFVVDN	40	1731	ZIKV-NS1	KETRCGTGVFVYNDV	6.66667
1014	DENV-1-NS1	LKCGSGIFVTNEVHT	13.3333	1193	DENV-2-NS1	ELKCGSGIFITDNVH	40	1373	DENV-3-NS1	LKCGSGIFVTNEVHT	13.3333	1552	DENV-4-NS1	ELKCGSGIFVVDNVH	53.3333	1732	ZIKV-NS1	TRCGTGVFVYNDVEA	20
1015	DENV-1-NS1	CGSGIFVTNEVHTWT	26.6667	1194	DENV-2-NS1	KCGSGIFITDNVHTW	20	1374	DENV-3-NS1	CGSGIFVTNEVHTWT	13.3333	1553	DENV-4-NS1	KCGSGIFVVDNVHTW	53.3333	1733	ZIKV-NS1	CGTGVFVYNDVEAWR	26.6667
1016	DENV-1-NS1	SGIFVTNEVHTWTEQ	20	1195	DENV-2-NS1	GSGIFITDNVHTWTE	40	1375	DENV-3-NS1	SGIFVTNEVHTWTEQ	33.3333	1554	DENV-4-NS1	GSGIFVVDNVHTWTE	53.3333	1734	ZIKV-NS1	TGVFVYNDVEAWRDR	26.6667
1017	DENV-1-NS1	IFVTNEVHTWTEQYK	13.3333	1196	DENV-2-NS1	GIFITDNVHTWTEQY	26.6667	1376	DENV-3-NS1	IFVTNEVHTWTEQYK	20	1555	DENV-4-NS1	GIFVVDNVHTWTEQY	53.3333	1735	ZIKV-NS1	VFVYNDVEAWRDRYK	33.3333
1018	DENV-1-NS1	VTNEVHTWTEQYKFQ	33.3333	1197	DENV-2-NS1	FITDNVHTWTEQYKF	13.3333	1377	DENV-3-NS1	VTNEVHTWTEQYKFQ	26.6667	1556	DENV-4-NS1	FVVDNVHTWTEQYKF	26.6667	1736	ZIKV-NS1	VYNDVEAWRDRYKYH	40
1019	DENV-1-NS1	NEVHTWTEQYKFQAD	40	1198	DENV-2-NS1	TDNVHTWTEQYKFQP	0	1378	DENV-3-NS1	NEVHTWTEQYKFQAD	46.6667	1557	DENV-4-NS1	VDNVHTWTEQYKFQP	60	1737	ZIKV-NS1	NDVEAWRDRYKYHPD	40
1020	DENV-1-NS1	VHTWTEQYKFQADSP	13.3333	1199	DENV-2-NS1	NVHTWTEQYKFQPES	33.3333	1379	DENV-3-NS1	VHTWTEQYKFQADSP	13.3333	1558	DENV-4-NS1	NVHTWTEQYKFQPES	13.3333	1738	ZIKV-NS1	VEAWRDRYKYHPDSP	20
1021	DENV-1-NS1	TWTEQYKFQADSPKR	0	1200	DENV-2-NS1	HTWTEQYKFQPESPS	0	1380	DENV-3-NS1	TWTEQYKFQADSPKR	0	1559	DENV-4-NS1	HTWTEQYKFQPESPA	0	1739	ZIKV-NS1	AWRDRYKYHPDSPRR	20
1022	DENV-1-NS1	TEQYKFQADSPKRLS	0	1201	DENV-2-NS1	WTEQYKFQPESPSKL	6.66667	1381	DENV-3-NS1	TEQYKFQADSPKRLA	0	1560	DENV-4-NS1	WTEQYKFQPESPARL	0	1740	ZIKV-NS1	RDRYKYHPDSPRRLA	26.6667
1023	DENV-1-NS1	QYKFQADSPKRLSAA	0	1202	DENV-2-NS1	EQYKFQPESPSKLAS	6.66667	1382	DENV-3-NS1	QYKFQADSPKRLATA	0	1561	DENV-4-NS1	EQYKFQPESPARLAS	20	1741	ZIKV-NS1	RYKYHPDSPRRLAAA	0
1024	DENV-1-NS1	KFQADSPKRLSAAIG	6.66667	1203	DENV-2-NS1	YKFQPESPSKLASAI	6.66667	1383	DENV-3-NS1	KFQADSPKRLATAIA	0	1562	DENV-4-NS1	YKFQPESPARLASAI	6.66667	1742	ZIKV-NS1	KYHPDSPRRLAAAVK	13.3333
1025	DENV-1-NS1	QADSPKRLSAAIGKA	0	1204	DENV-2-NS1	FQPESPSKLASAIQK	0	1384	DENV-3-NS1	QADSPKRLATAIAGA	0	1563	DENV-4-NS1	FQPESPARLASAILN	6.66667	1743	ZIKV-NS1	HPDSPRRLAAAVKQA	0
1026	DENV-1-NS1	DSPKRLSAAIGKAWE	26.6667	1205	DENV-2-NS1	PESPSKLASAIQKAH	0	1385	DENV-3-NS1	DSPKRLATAIAGAWE	26.6667	1564	DENV-4-NS1	PESPARLASAILNAH	6.66667	1744	ZIKV-NS1	DSPRRLAAAVKQAWE	33.3333
1027	DENV-1-NS1	PKRLSAAIGKAWEEG	6.66667	1206	DENV-2-NS1	SPSKLASAIQKAHEE	20	1386	DENV-3-NS1	PKRLATAIAGAWENG	0	1565	DENV-4-NS1	SPARLASAILNAHKD	13.3333	1745	ZIKV-NS1	PRRLAAAVKQAWEDG	6.66667
1028	DENV-1-NS1	RLSAAIGKAWEEGVC	6.66667	1207	DENV-2-NS1	SKLASAIQKAHEEGI	13.3333	1387	DENV-3-NS1	RLATAIAGAWENGVC	6.66667	1566	DENV-4-NS1	ARLASAILNAHKDGV	13.3333	1746	ZIKV-NS1	RLAAAVKQAWEDGIC	20
1029	DENV-1-NS1	SAAIGKAWEEGVCGI	20	1208	DENV-2-NS1	LASAIQKAHEEGICG	13.3333	1388	DENV-3-NS1	ATAIAGAWENGVCGI	0	1567	DENV-4-NS1	LASAILNAHKDGVCG	6.66667	1747	ZIKV-NS1	AAAVKQAWEDGICGI	20
1030	DENV-1-NS1	AIGKAWEEGVCGIRS	0	1209	DENV-2-NS1	SAIQKAHEEGICGIR	26.6667	1389	DENV-3-NS1	AIAGAWENGVCGIRS	0	1568	DENV-4-NS1	SAILNAHKDGVCGIR	20	1748	ZIKV-NS1	AVKQAWEDGICGISS	0
1031	DENV-1-NS1	GKAWEEGVCGIRSAT	0	1210	DENV-2-NS1	IQKAHEEGICGIRSV	13.3333	1390	DENV-3-NS1	AGAWENGVCGIRSTT	13.3333	1569	DENV-4-NS1	ILNAHKDGVCGIRST	0	1749	ZIKV-NS1	KQAWEDGICGISSVS	33.3333
1032	DENV-1-NS1	AWEEGVCGIRSATRL	0	1211	DENV-2-NS1	KAHEEGICGIRSVTR	6.66667	1391	DENV-3-NS1	AWENGVCGIRSTTRM	0	1570	DENV-4-NS1	NAHKDGVCGIRSTTR	26.6667	1750	ZIKV-NS1	AWEDGICGISSVSRM	13.3333
1033	DENV-1-NS1	EEGVCGIRSATRLEN	46.6667	1212	DENV-2-NS1	HEEGICGIRSVTRLE	6.66667	1392	DENV-3-NS1	ENGVCGIRSTTRMEN	13.3333	1571	DENV-4-NS1	HKDGVCGIRSTTRLE	0	1751	ZIKV-NS1	EDGICGISSVSRMEN	46.6667
1034	DENV-1-NS1	GVCGIRSATRLENIM	0	1213	DENV-2-NS1	EGICGIRSVTRLENL	26.6667	1393	DENV-3-NS1	GVCGIRSTTRMENLL	0	1572	DENV-4-NS1	DGVCGIRSTTRLENV	13.3333	1752	ZIKV-NS1	GICGISSVSRMENIM	20
1035	DENV-1-NS1	CGIRSATRLENIMWK	0	1214	DENV-2-NS1	ICGIRSVTRLENLMW	13.3333	1394	DENV-3-NS1	CGIRSTTRMENLLWK	0	1573	DENV-4-NS1	VCGIRSTTRLENVMW	6.66667	1753	ZIKV-NS1	CGISSVSRMENIMWR	13.3333
1036	DENV-1-NS1	IRSATRLENIMWKQI	0	1215	DENV-2-NS1	GIRSVTRLENLMWKQ	0	1395	DENV-3-NS1	IRSTTRMENLLWKQI	0	1574	DENV-4-NS1	GIRSTTRLENVMWKQ	0	1754	ZIKV-NS1	ISSVSRMENIMWRSV	40
1037	DENV-1-NS1	SATRLENIMWKQISN	6.66667	1216	DENV-2-NS1	RSVTRLENLMWKQIT	0	1396	DENV-3-NS1	STTRMENLLWKQIAN	0	1575	DENV-4-NS1	RSTTRLENVMWKQIT	0	1755	ZIKV-NS1	SVSRMENIMWRSVEG	0
1038	DENV-1-NS1	TRLENIMWKQISNEL	26.6667	1217	DENV-2-NS1	VTRLENLMWKQITPE	0	1397	DENV-3-NS1	TRMENLLWKQIANEL	33.3333	1576	DENV-4-NS1	TTRLENVMWKQITNE	40	1756	ZIKV-NS1	SRMENIMWRSVEGEL	40
1039	DENV-1-NS1	LENIMWKQISNELNH	20	1218	DENV-2-NS1	RLENLMWKQITPELN	6.66667	1398	DENV-3-NS1	MENLLWKQIANELNY	60	1577	DENV-4-NS1	RLENVMWKQITNELN	53.3333	1757	ZIKV-NS1	MENIMWRSVEGELNA	46.6667
1040	DENV-1-NS1	NIMWKQISNELNHIL	33.3333	1219	DENV-2-NS1	ENLMWKQITPELNHI	40	1399	DENV-3-NS1	NLLWKQIANELNYIL	6.66667	1578	DENV-4-NS1	ENVMWKQITNELNYV	33.3333	1758	ZIKV-NS1	NIMWRSVEGELNAIL	60
1041	DENV-1-NS1	MWKQISNELNHILLE	6.66667	1220	DENV-2-NS1	LMWKQITPELNHILS	13.3333	1400	DENV-3-NS1	LWKQIANELNYILWE	0	1579	DENV-4-NS1	VMWKQITNELNYVLW	6.66667	1759	ZIKV-NS1	MWRSVEGELNAILEE	66.6667
1042	DENV-1-NS1	KQISNELNHILLEND	26.6667	1221	DENV-2-NS1	WKQITPELNHILSEN	66.6667	1401	DENV-3-NS1	KQIANELNYILWENN	46.6667	1580	DENV-4-NS1	WKQITNELNYVLWEG	33.3333	1760	ZIKV-NS1	RSVEGELNAILEENG	66.6667
1043	DENV-1-NS1	ISNELNHILLENDMK	46.6667	1222	DENV-2-NS1	QITPELNHILSENEV	40	1402	DENV-3-NS1	IANELNYILWENNIK	53.3333	1581	DENV-4-NS1	QITNELNYVLWEGGH	26.6667	1761	ZIKV-NS1	VEGELNAILEENGVQ	40
1044	DENV-1-NS1	NELNHILLENDMKFT	53.3333	1223	DENV-2-NS1	TPELNHILSENEVKL	20	1403	DENV-3-NS1	NELNYILWENNIKLT	33.3333	1582	DENV-4-NS1	TNELNYVLWEGGHDL	53.3333	1762	ZIKV-NS1	GELNAILEENGVQLT	26.6667
1045	DENV-1-NS1	LNHILLENDMKFTVV	46.6667	1224	DENV-2-NS1	ELNHILSENEVKLTI	33.3333	1404	DENV-3-NS1	LNYILWENNIKLTVV	26.6667	1583	DENV-4-NS1	ELNYVLWEGGHDLTV	33.3333	1763	ZIKV-NS1	LNAILEENGVQLTVV	33.3333
1046	DENV-1-NS1	HILLENDMKFTVVVG	13.3333	1225	DENV-2-NS1	NHILSENEVKLTIMT	40	1405	DENV-3-NS1	YILWENNIKLTVVVG	20	1584	DENV-4-NS1	NYVLWEGGHDLTVVA	13.3333	1764	ZIKV-NS1	AILEENGVQLTVVVG	20
1047	DENV-1-NS1	LLENDMKFTVVVGDA	20	1226	DENV-2-NS1	ILSENEVKLTIMTGD	6.66667	1406	DENV-3-NS1	LWENNIKLTVVVGDI	40	1585	DENV-4-NS1	VLWEGGHDLTVVAGD	20	1765	ZIKV-NS1	LEENGVQLTVVVGSV	6.66667
1048	DENV-1-NS1	ENDMKFTVVVGDANG	20	1227	DENV-2-NS1	SENEVKLTIMTGDIK	6.66667	1407	DENV-3-NS1	ENNIKLTVVVGDIIG	33.3333	1586	DENV-4-NS1	WEGGHDLTVVAGDVK	13.3333	1766	ZIKV-NS1	ENGVQLTVVVGSVKN	13.3333
1049	DENV-1-NS1	DMKFTVVVGDANGIL	6.66667	1228	DENV-2-NS1	NEVKLTIMTGDIKGI	20	1408	DENV-3-NS1	NIKLTVVVGDIIGVL	33.3333	1587	DENV-4-NS1	GGHDLTVVAGDVKGV	13.3333	1767	ZIKV-NS1	GVQLTVVVGSVKNPM	6.66667
1050	DENV-1-NS1	KFTVVVGDANGILAQ	6.66667	1229	DENV-2-NS1	VKLTIMTGDIKGIMQ	6.66667	1409	DENV-3-NS1	KLTVVVGDIIGVLEQ	20	1588	DENV-4-NS1	HDLTVVAGDVKGVLT	13.3333	1768	ZIKV-NS1	QLTVVVGSVKNPMWR	6.66667
1051	DENV-1-NS1	TVVVGDANGILAQGK	6.66667	1230	DENV-2-NS1	LTIMTGDIKGIMQAG	0	1410	DENV-3-NS1	TVVVGDIIGVLEQGK	13.3333	1589	DENV-4-NS1	LTVVAGDVKGVLTKG	13.3333	1769	ZIKV-NS1	TVVVGSVKNPMWRGP	26.6667
1052	DENV-1-NS1	VVGDANGILAQGKKM	0	1231	DENV-2-NS1	IMTGDIKGIMQAGKR	0	1411	DENV-3-NS1	VVGDIIGVLEQGKRT	6.66667	1590	DENV-4-NS1	VVAGDVKGVLTKGKR	0	1770	ZIKV-NS1	VVGSVKNPMWRGPQR	6.66667
1053	DENV-1-NS1	GDANGILAQGKKMIR	0	1232	DENV-2-NS1	TGDIKGIMQAGKRSL	0	1412	DENV-3-NS1	GDIIGVLEQGKRTLT	0	1591	DENV-4-NS1	AGDVKGVLTKGKRAL	0	1771	ZIKV-NS1	GSVKNPMWRGPQRLP	6.66667
1054	DENV-1-NS1	ANGILAQGKKMIRPQ	0	1233	DENV-2-NS1	DIKGIMQAGKRSLRP	0	1413	DENV-3-NS1	IIGVLEQGKRTLTPQ	0	1592	DENV-4-NS1	DVKGVLTKGKRALTP	0	1772	ZIKV-NS1	VKNPMWRGPQRLPVP	0
1055	DENV-1-NS1	GILAQGKKMIRPQPM	0	1234	DENV-2-NS1	KGIMQAGKRSLRPQP	0	1414	DENV-3-NS1	GVLEQGKRTLTPQPM	0	1593	DENV-4-NS1	KGVLTKGKRALTPPA	0	1773	ZIKV-NS1	NPMWRGPQRLPVPVN	20
1056	DENV-1-NS1	LAQGKKMIRPQPMEH	0	1235	DENV-2-NS1	IMQAGKRSLRPQPTE	0	1415	DENV-3-NS1	LEQGKRTLTPQPMEL	0	1594	DENV-4-NS1	VLTKGKRALTPPASD	0	1774	ZIKV-NS1	MWRGPQRLPVPVNEL	40
1057	DENV-1-NS1	QGKKMIRPQPMEHKY	0	1236	DENV-2-NS1	QAGKRSLRPQPTELK	0	1416	DENV-3-NS1	QGKRTLTPQPMELKY	0	1595	DENV-4-NS1	TKGKRALTPPASDLK	6.66667	1775	ZIKV-NS1	RGPQRLPVPVNELPH	13.3333
1058	DENV-1-NS1	KKMIRPQPMEHKYSW	0	1237	DENV-2-NS1	GKRSLRPQPTELKYS	0	1417	DENV-3-NS1	KRTLTPQPMELKYSW	0	1596	DENV-4-NS1	GKRALTPPASDLKYS	0	1776	ZIKV-NS1	PQRLPVPVNELPHGW	26.6667
1059	DENV-1-NS1	MIRPQPMEHKYSWKS	0	1238	DENV-2-NS1	RSLRPQPTELKYSWK	0	1418	DENV-3-NS1	TLTPQPMELKYSWKT	0	1597	DENV-4-NS1	RALTPPASDLKYSWK	0	1777	ZIKV-NS1	RLPVPVNELPHGWKA	0
1060	DENV-1-NS1	RPQPMEHKYSWKSWG	0	1239	DENV-2-NS1	LRPQPTELKYSWKTW	0	1419	DENV-3-NS1	TPQPMELKYSWKTWG	0	1598	DENV-4-NS1	LTPPASDLKYSWKTW	6.66667	1778	ZIKV-NS1	PVPVNELPHGWKAWG	26.6667
1061	DENV-1-NS1	QPMEHKYSWKSWGKA	6.66667	1240	DENV-2-NS1	PQPTELKYSWKTWGK	0	1420	DENV-3-NS1	QPMELKYSWKTWGKA	6.66667	1599	DENV-4-NS1	PPASDLKYSWKTWGK	0	1779	ZIKV-NS1	PVNELPHGWKAWGKS	6.66667
1062	DENV-1-NS1	MEHKYSWKSWGKAKI	13.3333	1241	DENV-2-NS1	PTELKYSWKTWGKAK	6.66667	1421	DENV-3-NS1	MELKYSWKTWGKAKI	13.3333	1600	DENV-4-NS1	ASDLKYSWKTWGKAK	6.66667	1780	ZIKV-NS1	NELPHGWKAWGKSYF	13.3333
1063	DENV-1-NS1	HKYSWKSWGKAKIIG	6.66667	1242	DENV-2-NS1	ELKYSWKTWGKAKML	13.3333	1422	DENV-3-NS1	LKYSWKTWGKAKIVT	6.66667	1601	DENV-4-NS1	DLKYSWKTWGKAKIF	6.66667	1781	ZIKV-NS1	LPHGWKAWGKSYFVR	0
1064	DENV-1-NS1	YSWKSWGKAKIIGAD	20	1243	DENV-2-NS1	KYSWKTWGKAKMLST	13.3333	1423	DENV-3-NS1	YSWKTWGKAKIVTAE	20	1602	DENV-4-NS1	KYSWKTWGKAKIFTP	6.66667	1782	ZIKV-NS1	HGWKAWGKSYFVRAA	0
1065	DENV-1-NS1	WKSWGKAKIIGADIQ	20	1244	DENV-2-NS1	SWKTWGKAKMLSTES	0	1424	DENV-3-NS1	WKTWGKAKIVTAETQ	20	1603	DENV-4-NS1	SWKTWGKAKIFTPEA	0	1783	ZIKV-NS1	WKAWGKSYFVRAAKT	0
1066	DENV-1-NS1	SWGKAKIIGADIQNT	6.66667	1245	DENV-2-NS1	KTWGKAKMLSTESHN	0	1425	DENV-3-NS1	TWGKAKIVTAETQNS	13.3333	1604	DENV-4-NS1	KTWGKAKIFTPEARN	0	1784	ZIKV-NS1	AWGKSYFVRAAKTNN	40
1067	DENV-1-NS1	GKAKIIGADIQNTTF	26.6667	1246	DENV-2-NS1	WGKAKMLSTESHNQT	0	1426	DENV-3-NS1	GKAKIVTAETQNSSF	40	1605	DENV-4-NS1	WGKAKIFTPEARNST	0	1785	ZIKV-NS1	GKSYFVRAAKTNNSF	46.6667
1068	DENV-1-NS1	AKIIGADIQNTTFII	20	1247	DENV-2-NS1	KAKMLSTESHNQTFL	6.66667	1427	DENV-3-NS1	AKIVTAETQNSSFII	46.6667	1606	DENV-4-NS1	KAKIFTPEARNSTFL	0	1786	ZIKV-NS1	SYFVRAAKTNNSFVV	20
1069	DENV-1-NS1	IIGADIQNTTFIIDG	0	1248	DENV-2-NS1	KMLSTESHNQTFLID	13.3333	1428	DENV-3-NS1	IVTAETQNSSFIIDG	53.3333	1607	DENV-4-NS1	KIFTPEARNSTFLID	13.3333	1787	ZIKV-NS1	FVRAAKTNNSFVVDG	60
1070	DENV-1-NS1	GADIQNTTFIIDGPD	13.3333	1249	DENV-2-NS1	LSTESHNQTFLIDGP	26.6667	1429	DENV-3-NS1	TAETQNSSFIIDGPN	20	1608	DENV-4-NS1	FTPEARNSTFLIDGP	13.3333	1788	ZIKV-NS1	RAAKTNNSFVVDGDT	53.3333
1071	DENV-1-NS1	DIQNTTFIIDGPDTP	26.6667	1250	DENV-2-NS1	TESHNQTFLIDGPET	13.3333	1430	DENV-3-NS1	ETQNSSFIIDGPNTP	33.3333	1609	DENV-4-NS1	PEARNSTFLIDGPDT	26.6667	1789	ZIKV-NS1	AKTNNSFVVDGDTLK	26.6667
1072	DENV-1-NS1	QNTTFIIDGPDTPEC	40	1251	DENV-2-NS1	SHNQTFLIDGPETAE	20	1431	DENV-3-NS1	QNSSFIIDGPNTPEC	40	1610	DENV-4-NS1	ARNSTFLIDGPDTSE	13.3333	1790	ZIKV-NS1	TNNSFVVDGDTLKEC	60
1073	DENV-1-NS1	TTFIIDGPDTPECPD	53.3333	1252	DENV-2-NS1	NQTFLIDGPETAECP	20	1432	DENV-3-NS1	SSFIIDGPNTPECPS	26.6667	1611	DENV-4-NS1	NSTFLIDGPDTSECP	40	1791	ZIKV-NS1	NSFVVDGDTLKECPL	40
1074	DENV-1-NS1	FIIDGPDTPECPDGQ	13.3333	1253	DENV-2-NS1	TFLIDGPETAECPNT	13.3333	1433	DENV-3-NS1	FIIDGPNTPECPSAS	6.66667	1612	DENV-4-NS1	TFLIDGPDTSECPNE	26.6667	1792	ZIKV-NS1	FVVDGDTLKECPLKH	6.66667
1075	DENV-1-NS1	IDGPDTPECPDGQRA	13.3333	1254	DENV-2-NS1	LIDGPETAECPNTNR	20	1434	DENV-3-NS1	IDGPNTPECPSASRA	0	1613	DENV-4-NS1	LIDGPDTSECPNERR	6.66667	1793	ZIKV-NS1	VDGDTLKECPLKHRA	13.3333
1076	DENV-1-NS1	GPDTPECPDGQRAWN	13.3333	1255	DENV-2-NS1	DGPETAECPNTNRAW	26.6667	1435	DENV-3-NS1	GPNTPECPSASRAWN	0	1614	DENV-4-NS1	DGPDTSECPNERRAW	20	1794	ZIKV-NS1	GDTLKECPLKHRAWN	0
1077	DENV-1-NS1	DTPECPDGQRAWNIW	20	1256	DENV-2-NS1	PETAECPNTNRAWNS	6.66667	1436	DENV-3-NS1	NTPECPSASRAWNVW	26.6667	1615	DENV-4-NS1	PDTSECPNERRAWNS	0	1795	ZIKV-NS1	TLKECPLKHRAWNSF	0
1078	DENV-1-NS1	PECPDGQRAWNIWEV	26.6667	1257	DENV-2-NS1	TAECPNTNRAWNSLE	33.3333	1437	DENV-3-NS1	PECPSASRAWNVWEV	26.6667	1616	DENV-4-NS1	TSECPNERRAWNSFE	26.6667	1796	ZIKV-NS1	KECPLKHRAWNSFLV	0
1079	DENV-1-NS1	CPDGQRAWNIWEVED	53.3333	1258	DENV-2-NS1	ECPNTNRAWNSLEVE	80	1438	DENV-3-NS1	CPSASRAWNVWEVED	73.3333	1617	DENV-4-NS1	ECPNERRAWNSFEVE	53.3333	1797	ZIKV-NS1	CPLKHRAWNSFLVED	13.3333
1080	DENV-1-NS1	DGQRAWNIWEVEDYG	73.3333	1259	DENV-2-NS1	PNTNRAWNSLEVEDY	53.3333	1439	DENV-3-NS1	SASRAWNVWEVEDYG	60	1618	DENV-4-NS1	PNERRAWNSFEVEDY	0	1798	ZIKV-NS1	LKHRAWNSFLVEDHG	13.3333
1081	DENV-1-NS1	QRAWNIWEVEDYGFG	13.3333	1260	DENV-2-NS1	TNRAWNSLEVEDYGF	26.6667	1440	DENV-3-NS1	SRAWNVWEVEDYGFG	0	1619	DENV-4-NS1	ERRAWNSFEVEDYGF	20	1799	ZIKV-NS1	HRAWNSFLVEDHGFG	20
1082	DENV-1-NS1	AWNIWEVEDYGFGVF	20	1261	DENV-2-NS1	RAWNSLEVEDYGFGV	0	1441	DENV-3-NS1	AWNVWEVEDYGFGVF	6.66667	1620	DENV-4-NS1	RAWNSFEVEDYGFGM	6.66667	1800	ZIKV-NS1	AWNSFLVEDHGFGVF	20
1083	DENV-1-NS1	NIWEVEDYGFGVFTT	66.6667	1262	DENV-2-NS1	WNSLEVEDYGFGVFT	6.66667	1442	DENV-3-NS1	NVWEVEDYGFGVFTT	60	1621	DENV-4-NS1	WNSFEVEDYGFGMFT	6.66667	1801	ZIKV-NS1	NSFLVEDHGFGVFHT	20
1084	DENV-1-NS1	WEVEDYGFGVFTTNI	33.3333	1263	DENV-2-NS1	SLEVEDYGFGVFTTN	46.6667	1443	DENV-3-NS1	WEVEDYGFGVFTTNI	40	1622	DENV-4-NS1	SFEVEDYGFGMFTTN	26.6667	1802	ZIKV-NS1	FLVEDHGFGVFHTSV	26.6667
1085	DENV-1-NS1	VEDYGFGVFTTNIWL	46.6667	1264	DENV-2-NS1	EVEDYGFGVFTTNIW	80	1444	DENV-3-NS1	VEDYGFGVFTTNIWL	26.6667	1623	DENV-4-NS1	EVEDYGFGMFTTNIW	53.3333	1803	ZIKV-NS1	VEDHGFGVFHTSVWL	6.66667
1086	DENV-1-NS1	DYGFGVFTTNIWLKL	13.3333	1265	DENV-2-NS1	EDYGFGVFTTNIWLK	26.6667	1445	DENV-3-NS1	DYGFGVFTTNIWLKL	20	1624	DENV-4-NS1	EDYGFGMFTTNIWMK	13.3333	1804	ZIKV-NS1	DHGFGVFHTSVWLKV	0
1087	DENV-1-NS1	GFGVFTTNIWLKLRD	26.6667	1266	DENV-2-NS1	YGFGVFTTNIWLKLR	20	1446	DENV-3-NS1	GFGVFTTNIWLKLRE	20	1625	DENV-4-NS1	YGFGMFTTNIWMKFR	0	1805	ZIKV-NS1	GFGVFHTSVWLKVRE	6.66667
1088	DENV-1-NS1	GVFTTNIWLKLRDSY	33.3333	1267	DENV-2-NS1	FGVFTTNIWLKLREK	6.66667	1447	DENV-3-NS1	GVFTTNIWLKLREVY	26.6667	1626	DENV-4-NS1	FGMFTTNIWMKFREG	0	1806	ZIKV-NS1	GVFHTSVWLKVREDY	26.6667
1089	DENV-1-NS1	FTTNIWLKLRDSYTQ	0	1268	DENV-2-NS1	VFTTNIWLKLREKQD	26.6667	1448	DENV-3-NS1	FTTNIWLKLREVYTQ	6.66667	1627	DENV-4-NS1	MFTTNIWMKFREGSS	0	1807	ZIKV-NS1	FHTSVWLKVREDYSL	33.3333
1090	DENV-1-NS1	TNIWLKLRDSYTQMC	0	1269	DENV-2-NS1	TTNIWLKLREKQDVF	40	1449	DENV-3-NS1	TNIWLKLREVYTQLC	20	1628	DENV-4-NS1	TTNIWMKFREGSSEV	26.6667	1808	ZIKV-NS1	TSVWLKVREDYSLEC	46.6667
1091	DENV-1-NS1	IWLKLRDSYTQMCDH	6.66667	1270	DENV-2-NS1	NIWLKLREKQDVFCD	13.3333	1450	DENV-3-NS1	IWLKLREVYTQLCDH	6.66667	1629	DENV-4-NS1	NIWMKFREGSSEVCD	53.3333	1809	ZIKV-NS1	VWLKVREDYSLECDP	33.3333
1092	DENV-1-NS1	LKLRDSYTQMCDHRL	0	1271	DENV-2-NS1	WLKLREKQDVFCDSK	13.3333	1451	DENV-3-NS1	LKLREVYTQLCDHRL	6.66667	1630	DENV-4-NS1	WMKFREGSSEVCDHR	6.66667	1810	ZIKV-NS1	LKVREDYSLECDPAV	26.6667
1093	DENV-1-NS1	LRDSYTQMCDHRLMS	0	1272	DENV-2-NS1	KLREKQDVFCDSKLM	6.66667	1452	DENV-3-NS1	LREVYTQLCDHRLMS	0	1631	DENV-4-NS1	KFREGSSEVCDHRLM	6.66667	1811	ZIKV-NS1	VREDYSLECDPAVIG	33.3333
1094	DENV-1-NS1	DSYTQMCDHRLMSAA	20	1273	DENV-2-NS1	REKQDVFCDSKLMSA	0	1453	DENV-3-NS1	EVYTQLCDHRLMSAA	13.3333	1632	DENV-4-NS1	REGSSEVCDHRLMSA	0	1812	ZIKV-NS1	EDYSLECDPAVIGTA	33.3333
1095	DENV-1-NS1	YTQMCDHRLMSAAIK	0	1274	DENV-2-NS1	KQDVFCDSKLMSAAI	6.66667	1454	DENV-3-NS1	YTQLCDHRLMSAAVK	6.66667	1633	DENV-4-NS1	GSSEVCDHRLMSAAI	6.66667	1813	ZIKV-NS1	YSLECDPAVIGTAVK	0
1096	DENV-1-NS1	QMCDHRLMSAAIKDS	6.66667	1275	DENV-2-NS1	DVFCDSKLMSAAIKD	20	1455	DENV-3-NS1	QLCDHRLMSAAVKDE	26.6667	1634	DENV-4-NS1	SEVCDHRLMSAAIKD	13.3333	1814	ZIKV-NS1	LECDPAVIGTAVKGK	0
1097	DENV-1-NS1	CDHRLMSAAIKDSKA	6.66667	1276	DENV-2-NS1	FCDSKLMSAAIKDNR	0	1456	DENV-3-NS1	CDHRLMSAAVKDERA	20	1635	DENV-4-NS1	VCDHRLMSAAIKDQK	0	1815	ZIKV-NS1	CDPAVIGTAVKGKEA	0
1098	DENV-1-NS1	HRLMSAAIKDSKAVH	6.66667	1277	DENV-2-NS1	DSKLMSAAIKDNRAV	20	1457	DENV-3-NS1	HRLMSAAVKDERAVH	13.3333	1636	DENV-4-NS1	DHRLMSAAIKDQKAV	6.66667	1816	ZIKV-NS1	PAVIGTAVKGKEAVH	0
1099	DENV-1-NS1	LMSAAIKDSKAVHAD	0	1278	DENV-2-NS1	KLMSAAIKDNRAVHA	0	1458	DENV-3-NS1	LMSAAVKDERAVHAD	20	1637	DENV-4-NS1	RLMSAAIKDQKAVHA	0	1817	ZIKV-NS1	VIGTAVKGKEAVHSD	6.66667
1100	DENV-1-NS1	SAAIKDSKAVHADMG	26.6667	1279	DENV-2-NS1	MSAAIKDNRAVHADM	0	1459	DENV-3-NS1	SAAVKDERAVHADMG	13.3333	1638	DENV-4-NS1	MSAAIKDQKAVHADM	6.66667	1818	ZIKV-NS1	GTAVKGKEAVHSDLG	0
1101	DENV-1-NS1	AIKDSKAVHADMGYW	6.66667	1280	DENV-2-NS1	AAIKDNRAVHADMGY	6.66667	1460	DENV-3-NS1	AVKDERAVHADMGYW	0	1639	DENV-4-NS1	AAIKDQKAVHADMGY	0	1819	ZIKV-NS1	AVKGKEAVHSDLGYW	6.66667
1102	DENV-1-NS1	KDSKAVHADMGYWIE	20	1281	DENV-2-NS1	IKDNRAVHADMGYWI	6.66667	1461	DENV-3-NS1	KDERAVHADMGYWIE	13.3333	1640	DENV-4-NS1	IKDQKAVHADMGYWI	13.3333	1820	ZIKV-NS1	KGKEAVHSDLGYWIE	6.66667
1103	DENV-1-NS1	SKAVHADMGYWIESE	26.6667	1282	DENV-2-NS1	DNRAVHADMGYWIES	26.6667	1462	DENV-3-NS1	ERAVHADMGYWIESQ	13.3333	1641	DENV-4-NS1	DQKAVHADMGYWIES	13.3333	1821	ZIKV-NS1	KEAVHSDLGYWIESE	26.6667
1104	DENV-1-NS1	AVHADMGYWIESEKN	0	1283	DENV-2-NS1	RAVHADMGYWIESAL	0	1463	DENV-3-NS1	AVHADMGYWIESQKN	0	1642	DENV-4-NS1	KAVHADMGYWIESSK	0	1822	ZIKV-NS1	AVHSDLGYWIESEKN	13.3333
1105	DENV-1-NS1	HADMGYWIESEKNET	13.3333	1284	DENV-2-NS1	VHADMGYWIESALND	46.6667	1464	DENV-3-NS1	HADMGYWIESQKNGS	0	1643	DENV-4-NS1	VHADMGYWIESSKNQ	13.3333	1823	ZIKV-NS1	HSDLGYWIESEKNDT	13.3333
1106	DENV-1-NS1	DMGYWIESEKNETWK	13.3333	1285	DENV-2-NS1	ADMGYWIESALNDTW	26.6667	1465	DENV-3-NS1	DMGYWIESQKNGSWK	6.66667	1644	DENV-4-NS1	ADMGYWIESSKNQTW	0	1824	ZIKV-NS1	DLGYWIESEKNDTWR	33.3333
1107	DENV-1-NS1	GYWIESEKNETWKLA	13.3333	1286	DENV-2-NS1	MGYWIESALNDTWKM	13.3333	1466	DENV-3-NS1	GYWIESQKNGSWKLE	6.66667	1645	DENV-4-NS1	MGYWIESSKNQTWQI	0	1825	ZIKV-NS1	GYWIESEKNDTWRLK	0
1108	DENV-1-NS1	WIESEKNETWKLARA	0	1287	DENV-2-NS1	YWIESALNDTWKMEK	13.3333	1467	DENV-3-NS1	WIESQKNGSWKLEKA	0	1646	DENV-4-NS1	YWIESSKNQTWQIER	13.3333	1826	ZIKV-NS1	WIESEKNDTWRLKRA	0
1109	DENV-1-NS1	ESEKNETWKLARASF	33.3333	1288	DENV-2-NS1	IESALNDTWKMEKAS	26.6667	1468	DENV-3-NS1	ESQKNGSWKLEKASL	13.3333	1647	DENV-4-NS1	IESSKNQTWQIERAS	6.66667	1827	ZIKV-NS1	ESEKNDTWRLKRAHL	26.6667
1110	DENV-1-NS1	EKNETWKLARASFIE	40	1289	DENV-2-NS1	SALNDTWKMEKASFI	26.6667	1469	DENV-3-NS1	QKNGSWKLEKASLIE	20	1648	DENV-4-NS1	SSKNQTWQIERASLI	33.3333	1828	ZIKV-NS1	EKNDTWRLKRAHLIE	20
1111	DENV-1-NS1	NETWKLARASFIEVK	26.6667	1290	DENV-2-NS1	LNDTWKMEKASFIEV	40	1470	DENV-3-NS1	NGSWKLEKASLIEVK	46.6667	1649	DENV-4-NS1	KNQTWQIERASLIEV	33.3333	1829	ZIKV-NS1	NDTWRLKRAHLIEMK	20
1112	DENV-1-NS1	TWKLARASFIEVKTC	0	1291	DENV-2-NS1	DTWKMEKASFIEVKS	13.3333	1471	DENV-3-NS1	SWKLEKASLIEVKTC	13.3333	1650	DENV-4-NS1	QTWQIERASLIEVKT	0	1830	ZIKV-NS1	TWRLKRAHLIEMKTC	0
1113	DENV-1-NS1	KLARASFIEVKTCTW	0	1292	DENV-2-NS1	WKMEKASFIEVKSCH	6.66667	1472	DENV-3-NS1	KLEKASLIEVKTCTW	13.3333	1651	DENV-4-NS1	WQIERASLIEVKTCL	6.66667	1831	ZIKV-NS1	RLKRAHLIEMKTCEW	13.3333
1114	DENV-1-NS1	ARASFIEVKTCTWPK	13.3333	1293	DENV-2-NS1	MEKASFIEVKSCHWP	6.66667	1473	DENV-3-NS1	EKASLIEVKTCTWPK	13.3333	1652	DENV-4-NS1	IERASLIEVKTCLWP	13.3333	1832	ZIKV-NS1	KRAHLIEMKTCEWPK	0
1115	DENV-1-NS1	ASFIEVKTCTWPKSH	0	1294	DENV-2-NS1	KASFIEVKSCHWPKS	0	1474	DENV-3-NS1	ASLIEVKTCTWPKSH	0	1653	DENV-4-NS1	RASLIEVKTCLWPKT	0	1833	ZIKV-NS1	AHLIEMKTCEWPKSH	6.66667
1116	DENV-1-NS1	FIEVKTCTWPKSHTL	0	1295	DENV-2-NS1	SFIEVKSCHWPKSHT	6.66667	1475	DENV-3-NS1	LIEVKTCTWPKSHTL	0	1654	DENV-4-NS1	SLIEVKTCLWPKTHT	0	1834	ZIKV-NS1	LIEMKTCEWPKSHTL	0
1117	DENV-1-NS1	EVKTCTWPKSHTLWS	6.66667	1296	DENV-2-NS1	IEVKSCHWPKSHTLW	13.3333	1476	DENV-3-NS1	EVKTCTWPKSHTLWS	0	1655	DENV-4-NS1	IEVKTCLWPKTHTLW	13.3333	1835	ZIKV-NS1	EMKTCEWPKSHTLWT	13.3333
1118	DENV-1-NS1	KTCTWPKSHTLWSNG	0	1297	DENV-2-NS1	VKSCHWPKSHTLWSN	0	1477	DENV-3-NS1	KTCTWPKSHTLWSNG	0	1656	DENV-4-NS1	VKTCLWPKTHTLWSN	0	1836	ZIKV-NS1	KTCEWPKSHTLWTDG	6.66667
1119	DENV-1-NS1	CTWPKSHTLWSNGVL	6.66667	1298	DENV-2-NS1	SCHWPKSHTLWSNGV	0	1478	DENV-3-NS1	CTWPKSHTLWSNGVL	0	1657	DENV-4-NS1	TCLWPKTHTLWSNGV	0	1837	ZIKV-NS1	CEWPKSHTLWTDGIE	13.3333
1120	DENV-1-NS1	WPKSHTLWSNGVLES	0	1299	DENV-2-NS1	HWPKSHTLWSNGVLE	6.66667	1479	DENV-3-NS1	WPKSHTLWSNGVLES	6.66667	1658	DENV-4-NS1	LWPKTHTLWSNGVLE	20	1838	ZIKV-NS1	WPKSHTLWTDGIEES	20
1121	DENV-1-NS1	KSHTLWSNGVLESEM	6.66667	1300	DENV-2-NS1	PKSHTLWSNGVLESE	33.3333	1480	DENV-3-NS1	KSHTLWSNGVLESDM	13.3333	1659	DENV-4-NS1	PKTHTLWSNGVLESQ	6.66667	1839	ZIKV-NS1	KSHTLWTDGIEESDL	33.3333
1122	DENV-1-NS1	HTLWSNGVLESEMII	6.66667	1301	DENV-2-NS1	SHTLWSNGVLESEMV	46.6667	1481	DENV-3-NS1	HTLWSNGVLESDMII	26.6667	1660	DENV-4-NS1	THTLWSNGVLESQML	20	1840	ZIKV-NS1	HTLWTDGIEESDLII	26.6667
1123	DENV-1-NS1	LWSNGVLESEMIIPK	0	1302	DENV-2-NS1	TLWSNGVLESEMVIP	6.66667	1482	DENV-3-NS1	LWSNGVLESDMIIPK	6.66667	1661	DENV-4-NS1	TLWSNGVLESQMLIP	20	1841	ZIKV-NS1	LWTDGIEESDLIIPK	26.6667
1124	DENV-1-NS1	SNGVLESEMIIPKIF	0	1303	DENV-2-NS1	WSNGVLESEMVIPKN	0	1483	DENV-3-NS1	SNGVLESDMIIPKSL	20	1662	DENV-4-NS1	WSNGVLESQMLIPKS	13.3333	1842	ZIKV-NS1	TDGIEESDLIIPKSL	20
1125	DENV-1-NS1	GVLESEMIIPKIFGG	20	1304	DENV-2-NS1	NGVLESEMVIPKNFA	0	1484	DENV-3-NS1	GVLESDMIIPKSLAG	13.3333	1663	DENV-4-NS1	NGVLESQMLIPKSYA	20	1843	ZIKV-NS1	GIEESDLIIPKSLAG	20
1126	DENV-1-NS1	LESEMIIPKIFGGPI	20	1305	DENV-2-NS1	VLESEMVIPKNFAGP	6.66667	1485	DENV-3-NS1	LESDMIIPKSLAGPI	26.6667	1664	DENV-4-NS1	VLESQMLIPKSYAGP	26.6667	1844	ZIKV-NS1	EESDLIIPKSLAGPL	53.3333
1127	DENV-1-NS1	SEMIIPKIFGGPISQ	6.66667	1306	DENV-2-NS1	ESEMVIPKNFAGPVS	40	1486	DENV-3-NS1	SDMIIPKSLAGPISQ	6.66667	1665	DENV-4-NS1	ESQMLIPKSYAGPFS	26.6667	1845	ZIKV-NS1	SDLIIPKSLAGPLSH	6.66667
1128	DENV-1-NS1	MIIPKIFGGPISQHN	13.3333	1307	DENV-2-NS1	EMVIPKNFAGPVSQH	40	1487	DENV-3-NS1	MIIPKSLAGPISQHN	13.3333	1666	DENV-4-NS1	QMLIPKSYAGPFSQH	6.66667	1846	ZIKV-NS1	LIIPKSLAGPLSHHN	13.3333
1129	DENV-1-NS1	IPKIFGGPISQHNYR	6.66667	1308	DENV-2-NS1	VIPKNFAGPVSQHNY	33.3333	1488	DENV-3-NS1	IPKSLAGPISQHNHR	0	1667	DENV-4-NS1	LIPKSYAGPFSQHNY	13.3333	1847	ZIKV-NS1	IPKSLAGPLSHHNTR	6.66667
1130	DENV-1-NS1	KIFGGPISQHNYRPG	6.66667	1309	DENV-2-NS1	PKNFAGPVSQHNYRP	13.3333	1489	DENV-3-NS1	KSLAGPISQHNHRPG	13.3333	1668	DENV-4-NS1	PKSYAGPFSQHNYRQ	0	1848	ZIKV-NS1	KSLAGPLSHHNTREG	6.66667
1131	DENV-1-NS1	FGGPISQHNYRPGYF	33.3333	1310	DENV-2-NS1	NFAGPVSQHNYRPGY	33.3333	1490	DENV-3-NS1	LAGPISQHNHRPGYH	6.66667	1669	DENV-4-NS1	SYAGPFSQHNYRQGY	13.3333	1849	ZIKV-NS1	LAGPLSHHNTREGYR	6.66667
1132	DENV-1-NS1	GPISQHNYRPGYFTQ	6.66667	1311	DENV-2-NS1	AGPVSQHNYRPGYHT	6.66667	1491	DENV-3-NS1	GPISQHNHRPGYHTQ	6.66667	1670	DENV-4-NS1	AGPFSQHNYRQGYAT	6.66667	1850	ZIKV-NS1	GPLSHHNTREGYRTQ	6.66667
1133	DENV-1-NS1	ISQHNYRPGYFTQTA	6.66667	1312	DENV-2-NS1	PVSQHNYRPGYHTQT	6.66667	1492	DENV-3-NS1	ISQHNHRPGYHTQTA	13.3333	1671	DENV-4-NS1	PFSQHNYRQGYATQT	13.3333	1851	ZIKV-NS1	LSHHNTREGYRTQMK	0
1134	DENV-1-NS1	QHNYRPGYFTQTAGP	6.66667	1313	DENV-2-NS1	SQHNYRPGYHTQTAG	0	1493	DENV-3-NS1	QHNHRPGYHTQTAGP	13.3333	1672	DENV-4-NS1	SQHNYRQGYATQTVG	6.66667	1852	ZIKV-NS1	HHNTREGYRTQMKGP	6.66667
1135	DENV-1-NS1	NYRPGYFTQTAGPWH	20	1314	DENV-2-NS1	HNYRPGYHTQTAGPW	6.66667	1494	DENV-3-NS1	NHRPGYHTQTAGPWH	20	1673	DENV-4-NS1	HNYRQGYATQTVGPW	13.3333	1853	ZIKV-NS1	NTREGYRTQMKGPWH	20
1136	DENV-1-NS1	RPGYFTQTAGPWHLG	0	1315	DENV-2-NS1	YRPGYHTQTAGPWHL	0	1495	DENV-3-NS1	RPGYHTQTAGPWHLG	0	1674	DENV-4-NS1	YRQGYATQTVGPWHL	0	1854	ZIKV-NS1	REGYRTQMKGPWHSE	6.66667
1137	DENV-1-NS1	GYFTQTAGPWHLGKL	6.66667	1316	DENV-2-NS1	PGYHTQTAGPWHLGK	0	1496	DENV-3-NS1	GYHTQTAGPWHLGKL	6.66667	1675	DENV-4-NS1	QGYATQTVGPWHLGK	0	1855	ZIKV-NS1	GYRTQMKGPWHSEEL	0
1138	DENV-1-NS1	FTQTAGPWHLGKLEL	6.66667	1317	DENV-2-NS1	YHTQTAGPWHLGKLE	6.66667	1497	DENV-3-NS1	HTQTAGPWHLGKLEL	6.66667	1676	DENV-4-NS1	YATQTVGPWHLGKLE	6.66667	1856	ZIKV-NS1	RTQMKGPWHSEELEI	20
1139	DENV-1-NS1	QTAGPWHLGKLELDF	33.3333	1318	DENV-2-NS1	TQTAGPWHLGKLEMD	13.3333	1498	DENV-3-NS1	QTAGPWHLGKLELDF	20	1677	DENV-4-NS1	TQTVGPWHLGKLEID	46.6667	1857	ZIKV-NS1	QMKGPWHSEELEIRF	33.3333
1140	DENV-1-NS1	AGPWHLGKLELDFDL	26.6667	1319	DENV-2-NS1	TAGPWHLGKLEMDFD	26.6667	1499	DENV-3-NS1	AGPWHLGKLELDFNY	20	1678	DENV-4-NS1	TVGPWHLGKLEIDFG	46.6667	1858	ZIKV-NS1	KGPWHSEELEIRFEE	33.3333
1141	DENV-1-NS1	PWHLGKLELDFDLCE	33.3333	1320	DENV-2-NS1	GPWHLGKLEMDFDFC	33.3333	1500	DENV-3-NS1	PWHLGKLELDFNYCE	20	1679	DENV-4-NS1	GPWHLGKLEIDFGEC	13.3333	1859	ZIKV-NS1	PWHSEELEIRFEECP	20
1142	DENV-1-NS1	HLGKLELDFDLCEGT	20	1321	DENV-2-NS1	WHLGKLEMDFDFCEG	46.6667	1501	DENV-3-NS1	HLGKLELDFNYCEGT	26.6667	1680	DENV-4-NS1	WHLGKLEIDFGECPG	6.66667	1860	ZIKV-NS1	HSEELEIRFEECPGT	13.3333
1143	DENV-1-NS1	GKLELDFDLCEGTTV	40	1322	DENV-2-NS1	LGKLEMDFDFCEGTT	60	1502	DENV-3-NS1	GKLELDFNYCEGTTV	40	1681	DENV-4-NS1	LGKLEIDFGECPGTT	26.6667	1861	ZIKV-NS1	EELEIRFEECPGTKV	53.3333
1144	DENV-1-NS1	LELDFDLCEGTTVVV	53.3333	1323	DENV-2-NS1	KLEMDFDFCEGTTVV	53.3333	1503	DENV-3-NS1	LELDFNYCEGTTVVI	6.66667	1682	DENV-4-NS1	KLEIDFGECPGTTVT	6.66667	1862	ZIKV-NS1	LEIRFEECPGTKVHV	13.3333
1145	DENV-1-NS1	LDFDLCEGTTVVVDE	0	1324	DENV-2-NS1	EMDFDFCEGTTVVVT	33.3333	1504	DENV-3-NS1	LDFNYCEGTTVVITE	20	1683	DENV-4-NS1	EIDFGECPGTTVTIQ	20	1863	ZIKV-NS1	IRFEECPGTKVHVEE	20
1146	DENV-1-NS1	FDLCEGTTVVVDEHC	13.3333	1325	DENV-2-NS1	DFDFCEGTTVVVTED	46.6667	1505	DENV-3-NS1	FNYCEGTTVVITENC	13.3333	1684	DENV-4-NS1	DFGECPGTTVTIQEN	40	1864	ZIKV-NS1	FEECPGTKVHVEETC	13.3333
1147	DENV-1-NS1	LCEGTTVVVDEHCGN	6.66667	1326	DENV-2-NS1	DFCEGTTVVVTEDCE	40	1506	DENV-3-NS1	YCEGTTVVITENCGT	6.66667	1685	DENV-4-NS1	GECPGTTVTIQENCD	26.6667	1865	ZIKV-NS1	ECPGTKVHVEETCGT	0
1148	DENV-1-NS1	EGTTVVVDEHCGNRG	33.3333	1327	DENV-2-NS1	CEGTTVVVTEDCEKR	13.3333	1507	DENV-3-NS1	EGTTVVITENCGTRG	20	1686	DENV-4-NS1	CPGTTVTIQENCDHR	13.3333	1866	ZIKV-NS1	PGTKVHVEETCGTRG	0
1149	DENV-1-NS1	TTVVVDEHCGNRGPS	20	1328	DENV-2-NS1	GTTVVVTEDCEKRGP	6.66667	1508	DENV-3-NS1	TTVVITENCGTRGPS	20	1687	DENV-4-NS1	GTTVTIQENCDHRGP	20	1867	ZIKV-NS1	TKVHVEETCGTRGPS	6.66667
1150	DENV-1-NS1	VVVDEHCGNRGPSLR	20	1329	DENV-2-NS1	TVVVTEDCEKRGPSL	20	1509	DENV-3-NS1	VVITENCGTRGPSLR	6.66667	1688	DENV-4-NS1	TVTIQENCDHRGPSL	26.6667	1868	ZIKV-NS1	VHVEETCGTRGPSLR	13.3333
1151	DENV-1-NS1	VDEHCGNRGPSLRTT	20	1330	DENV-2-NS1	VVTEDCEKRGPSLRT	33.3333	1510	DENV-3-NS1	ITENCGTRGPSLRTT	6.66667	1689	DENV-4-NS1	TIQENCDHRGPSLRT	0	1869	ZIKV-NS1	VEETCGTRGPSLRST	6.66667
1152	DENV-1-NS1	EHCGNRGPSLRTTTV	20	1331	DENV-2-NS1	TEDCEKRGPSLRTTT	13.3333	1511	DENV-3-NS1	ENCGTRGPSLRTTTV	6.66667	1690	DENV-4-NS1	QENCDHRGPSLRTTT	13.3333	1870	ZIKV-NS1	ETCGTRGPSLRSTTA	13.3333
1153	DENV-1-NS1	CGNRGPSLRTTTVTG	20	1332	DENV-2-NS1	DCEKRGPSLRTTTAS	0	1512	DENV-3-NS1	CGTRGPSLRTTTVSG	6.66667	1691	DENV-4-NS1	NCDHRGPSLRTTTAS	6.66667	1871	ZIKV-NS1	CGTRGPSLRSTTASG	0
1154	DENV-1-NS1	NRGPSLRTTTVTGKI	33.3333	1333	DENV-2-NS1	EKRGPSLRTTTASGK	6.66667	1513	DENV-3-NS1	TRGPSLRTTTVSGKL	13.3333	1692	DENV-4-NS1	DHRGPSLRTTTASGK	0	1872	ZIKV-NS1	TRGPSLRSTTASGRV	6.66667
1155	DENV-1-NS1	GPSLRTTTVTGKIIH	20	1334	DENV-2-NS1	RGPSLRTTTASGKLI	13.3333	1514	DENV-3-NS1	GPSLRTTTVSGKLIH	13.3333	1693	DENV-4-NS1	RGPSLRTTTASGKLV	6.66667	1873	ZIKV-NS1	GPSLRSTTASGRVIE	6.66667
1156	DENV-1-NS1	SLRTTTVTGKIIHEW	33.3333	1335	DENV-2-NS1	PSLRTTTASGKLITE	33.3333	1515	DENV-3-NS1	SLRTTTVSGKLIHEW	33.3333	1694	DENV-4-NS1	PSLRTTTASGKLVTQ	6.66667	1874	ZIKV-NS1	SLRSTTASGRVIEEW	6.66667
1157	DENV-1-NS1	RTTTVTGKIIHEWCC	13.3333	1336	DENV-2-NS1	LRTTTASGKLITEWC	13.3333	1516	DENV-3-NS1	RTTTVSGKLIHEWCC	13.3333	1695	DENV-4-NS1	LRTTTASGKLVTQWC	6.66667	1875	ZIKV-NS1	RSTTASGRVIEEWCC	13.3333
1158	DENV-1-NS1	TTVTGKIIHEWCCRS	13.3333	1337	DENV-2-NS1	TTTASGKLITEWCCR	20	1517	DENV-3-NS1	TTVSGKLIHEWCCRS	6.66667	1696	DENV-4-NS1	TTTASGKLVTQWCCR	13.3333	1876	ZIKV-NS1	TTASGRVIEEWCCRE	20
1159	DENV-1-NS1	VTGKIIHEWCCRSCT	0	1338	DENV-2-NS1	TASGKLITEWCCRSC	13.3333	1518	DENV-3-NS1	VSGKLIHEWCCRSCT	0	1697	DENV-4-NS1	TASGKLVTQWCCRSC	6.66667	1877	ZIKV-NS1	ASGRVIEEWCCRECT	6.66667
1160	DENV-1-NS1	GKIIHEWCCRSCTLP	0	1339	DENV-2-NS1	SGKLITEWCCRSCTL	0	1519	DENV-3-NS1	GKLIHEWCCRSCTLP	0	1698	DENV-4-NS1	SGKLVTQWCCRSCTM	0	1878	ZIKV-NS1	GRVIEEWCCRECTMP	0
1161	DENV-1-NS1	IIHEWCCRSCTLPPL	13.3333	1340	DENV-2-NS1	KLITEWCCRSCTLPP	0	1520	DENV-3-NS1	LIHEWCCRSCTLPPL	13.3333	1699	DENV-4-NS1	KLVTQWCCRSCTMPP	0	1879	ZIKV-NS1	VIEEWCCRECTMPPL	20
1162	DENV-1-NS1	HEWCCRSCTLPPLRF	0	1341	DENV-2-NS1	ITEWCCRSCTLPPLR	13.3333	1521	DENV-3-NS1	HEWCCRSCTLPPLRY	0	1700	DENV-4-NS1	VTQWCCRSCTMPPLR	6.66667	1880	ZIKV-NS1	EEWCCRECTMPPLSF	26.6667
1163	DENV-1-NS1	WCCRSCTLPPLRFRG	0	1342	DENV-2-NS1	EWCCRSCTLPPLRYR	0	1522	DENV-3-NS1	WCCRSCTLPPLRYMG	13.3333	1701	DENV-4-NS1	QWCCRSCTMPPLRFL	0	1881	ZIKV-NS1	WCCRECTMPPLSFRA	0
1164	DENV-1-NS1	CRSCTLPPLRFRGED	13.3333	1343	DENV-2-NS1	CCRSCTLPPLRYRGE	6.66667	1523	DENV-3-NS1	CRSCTLPPLRYMGED	6.66667	1702	DENV-4-NS1	CCRSCTMPPLRFLGE	6.66667	1882	ZIKV-NS1	CRECTMPPLSFRAKD	13.3333
1165	DENV-1-NS1	SCTLPPLRFRGEDGC	26.6667	1344	DENV-2-NS1	RSCTLPPLRYRGEDG	6.66667	1524	DENV-3-NS1	SCTLPPLRYMGEDGC	13.3333	1703	DENV-4-NS1	RSCTMPPLRFLGEDG	33.3333	1883	ZIKV-NS1	ECTMPPLSFRAKDGC	6.66667
1166	DENV-1-NS1	TLPPLRFRGEDGCWY	13.3333	1345	DENV-2-NS1	CTLPPLRYRGEDGCW	26.6667	1525	DENV-3-NS1	TLPPLRYMGEDGCWY	20	1704	DENV-4-NS1	CTMPPLRFLGEDGCW	13.3333	1884	ZIKV-NS1	TMPPLSFRAKDGCWY	0
1167	DENV-1-NS1	PPLRFRGEDGCWYGM	13.3333	1346	DENV-2-NS1	LPPLRYRGEDGCWYG	13.3333	1526	DENV-3-NS1	PPLRYMGEDGCWYGM	20	1705	DENV-4-NS1	MPPLRFLGEDGCWYG	26.6667	1885	ZIKV-NS1	PPLSFRAKDGCWYGM	0
1168	DENV-1-NS1	LRFRGEDGCWYGMEI	26.6667	1347	DENV-2-NS1	PLRYRGEDGCWYGME	13.3333	1527	DENV-3-NS1	LRYMGEDGCWYGMEI	6.66667	1706	DENV-4-NS1	PLRFLGEDGCWYGME	13.3333	1886	ZIKV-NS1	LSFRAKDGCWYGMEI	13.3333
1169	DENV-1-NS1	FRGEDGCWYGMEIRP	6.66667	1348	DENV-2-NS1	RYRGEDGCWYGMEIR	6.66667	1528	DENV-3-NS1	YMGEDGCWYGMEIRP	13.3333	1707	DENV-4-NS1	RFLGEDGCWYGMEIR	13.3333	1887	ZIKV-NS1	FRAKDGCWYGMEIRP	0
1170	DENV-1-NS1	GEDGCWYGMEIRPVK	0	1349	DENV-2-NS1	RGEDGCWYGMEIRPL	13.3333	1529	DENV-3-NS1	GEDGCWYGMEIRPIS	20	1708	DENV-4-NS1	LGEDGCWYGMEIRPL	20	1888	ZIKV-NS1	AKDGCWYGMEIRPRK	0
1171	DENV-1-NS1	DGCWYGMEIRPVKEK	0	1350	DENV-2-NS1	EDGCWYGMEIRPLKE	26.6667	1530	DENV-3-NS1	DGCWYGMEIRPISEK	20	1709	DENV-4-NS1	EDGCWYGMEIRPLSE	40	1889	ZIKV-NS1	DGCWYGMEIRPRKEP	6.66667
1172	DENV-1-NS1	CWYGMEIRPVKEKEE	13.3333	1351	DENV-2-NS1	GCWYGMEIRPLKEKE	6.66667	1531	DENV-3-NS1	CWYGMEIRPISEKEE	33.3333	1710	DENV-4-NS1	GCWYGMEIRPLSEKE	20	1890	ZIKV-NS1	CWYGMEIRPRKEPES	0
1173	DENV-1-NS1	YGMEIRPVKEKEENL	6.66667	1352	DENV-2-NS1	WYGMEIRPLKEKEEN	13.3333	1532	DENV-3-NS1	YGMEIRPISEKEENM	6.66667	1711	DENV-4-NS1	WYGMEIRPLSEKEEN	33.3333	1891	ZIKV-NS1	YGMEIRPRKEPESNL	0
1174	DENV-1-NS1	MEIRPVKEKEENLVR	6.66667	1353	DENV-2-NS1	GMEIRPLKEKEENLV	6.66667	1533	DENV-3-NS1	MEIRPISEKEENMVK	6.66667	1712	DENV-4-NS1	GMEIRPLSEKEENMV	6.66667	1892	ZIKV-NS1	MEIRPRKEPESNLVR	6.66667
1175	DENV-1-NS1	IRPVKEKEENLVRSM	0	1354	DENV-2-NS1	EIRPLKEKEENLVNS	20	1534	DENV-3-NS1	IRPISEKEENMVKSL	6.66667	1713	DENV-4-NS1	EIRPLSEKEENMVKS	13.3333	1893	ZIKV-NS1	IRPRKEPESNLVRSM	0
1176	DENV-1-NS1	PVKEKEENLVRSMVS	33.3333	1355	DENV-2-NS1	RPLKEKEENLVNSLV	6.66667	1535	DENV-3-NS1	PISEKEENMVKSLVS	40	1714	DENV-4-NS1	RPLSEKEENMVKSQV	0	1894	ZIKV-NS1	PRKEPESNLVRSMVT	6.66667
1177	DENV-1-NS1	KEKEENLVRSMVSAG	0	1356	DENV-2-NS1	LKEKEENLVNSLVTA	20	1536	DENV-3-NS1	SEKEENMVKSLVSAG	6.66667	1715	DENV-4-NS1	LSEKEENMVKSQVTA	0	1895	ZIKV-NS1	KEPESNLVRSMVTAG	0
1178	DENV-1-NS1	KEENLVRSMVSAGSG	0	1357	DENV-2-NS1	EKEENLVNSLVTAGS	20	1537	DENV-3-NS1	KEENMVKSLVSAGSG	6.66667	1716	DENV-4-NS1	EKEENMVKSQVTAGS	13.3333	1896	ZIKV-NS1	PESNLVRSMVTAGSG	0
1179	DENV-1-NS1	ENLVRSMVSAGSGSG	13.3333	1358	DENV-2-NS1	EENLVNSLVTAGSGS	40	1538	DENV-3-NS1	ENMVKSLVSAGSGSG	6.66667	1717	DENV-4-NS1	EENMVKSQVTAGSGS	20	1897	ZIKV-NS1	SNLVRSMVTAGSGSG	0
1180	DENV-1-NS1	LVRSMVSAGSGSGSG	0	1359	DENV-2-NS1	NLVNSLVTAGSGSGS	20	1539	DENV-3-NS1	MVKSLVSAGSGSGSG	0	1718	DENV-4-NS1	NMVKSQVTAGSGSGS	33.3333	1898	ZIKV-NS1	LVRSMVTAGSGSGSG	0
1181	DENV-1/2-NS1	RSMVSAGSGSGSGDS	6.66667	1360	DENV-2/3-NS1	VNSLVTAGSGSGSGD	33.3333	1540	DENV-3/4-NS1	KSLVSAGSGSGSGDM	6.66667	1719	DENV-4-ZIKV-NS1	VKSQVTAGSGSGSGD	20
1182	DENV-1/2-NS1	MVSAGSGSGSGDSGC	20	1361	DENV-2/3-NS1	SLVTAGSGSGSGDMG	6.66667	1541	DENV-3/4-NS1	LVSAGSGSGSGDMGC	13.3333	1720	DENV-4-ZIKV-NS1	SQVTAGSGSGSGDVG	13.3333
1183	DENV-1/2-NS1	SAGSGSGSGDSGCIV	13.3333	1362	DENV-2/3-NS1	VTAGSGSGSGDMGCV	0	1542	DENV-3/4-NS1	SAGSGSGSGDMGCVV	13.3333	1721	DENV-4-ZIKV-NS1	VTAGSGSGSGDVGCS	20
				1363	DENV-2/3-NS1	AGSGSGSGDMGCVIN	20					1722	DENV-4-ZIKV-NS1	AGSGSGSGDVGCSVD	26.6667
